# Supplementary material for: Transcriptome Profiling of Etridiazole-Exposed Zebrafish (Danio rerio) Embryos Reveals Pathways Associated with Cardiac and Ocular Toxicities
Source: MDPI journal article supplement (doi:10.3390/ijms242015067), 2023-10-11
Supplement: s1 [file s1]

# Transcriptome Profiling of Etridiazole-Exposed Zebrafish (*Danio rerio*) Embryos Reveals Pathways Associated with Cardiac and Ocular Toxicities

Bala Murali Krishna Vasamsetti<sup>1</sup>, Kyongmi Chon<sup>1,\*</sup>, Chang-Young Yoon<sup>1</sup>, Juyeong Kim<sup>1</sup>, Ji-Yeong Choi<sup>1</sup>, Sajeong Hawng<sup>1</sup>, and Kyeong-Hun Park<sup>1</sup>

<sup>1</sup>Toxicity and Risk Assessment Division, Department of Agro-Food Safety and Crop Protection, National Institute of Agricultural Sciences, Rural Development Administration, Wanju-gun 55365, Republic of Korea

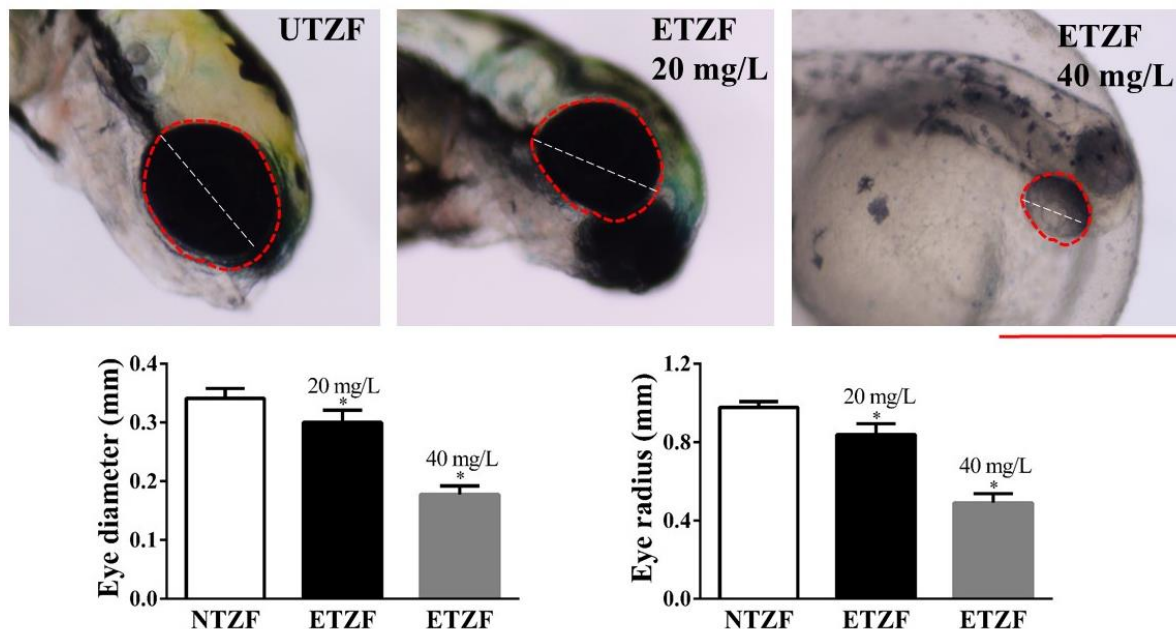

**Figure S1.** Etridiazole exposure induced ocular toxicity in zebrafish. Pictures showing retinal pigment accumulation and eye size at 96 hpf in the UTZF and ETZF. Graphs show the percentage of the eye diameter (mm) (left graph) and eye circumference (mm) (right graph) of the UTZF and ETZF. Red dotted circles: eyes; white dotted line: eye diameter; UTZF: untreated zebrafish; ETZF: etridiazole-treated zebrafish. Scale = 0.5mm.

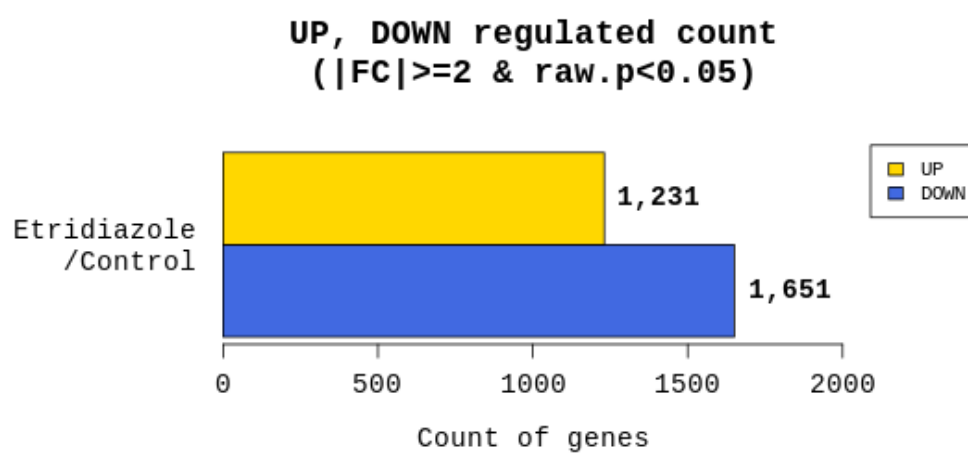

**Figure S2.** Images showing the number of up- and down- regulated DEGs after etridiazole exposure.

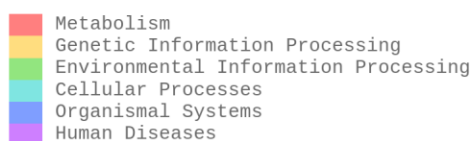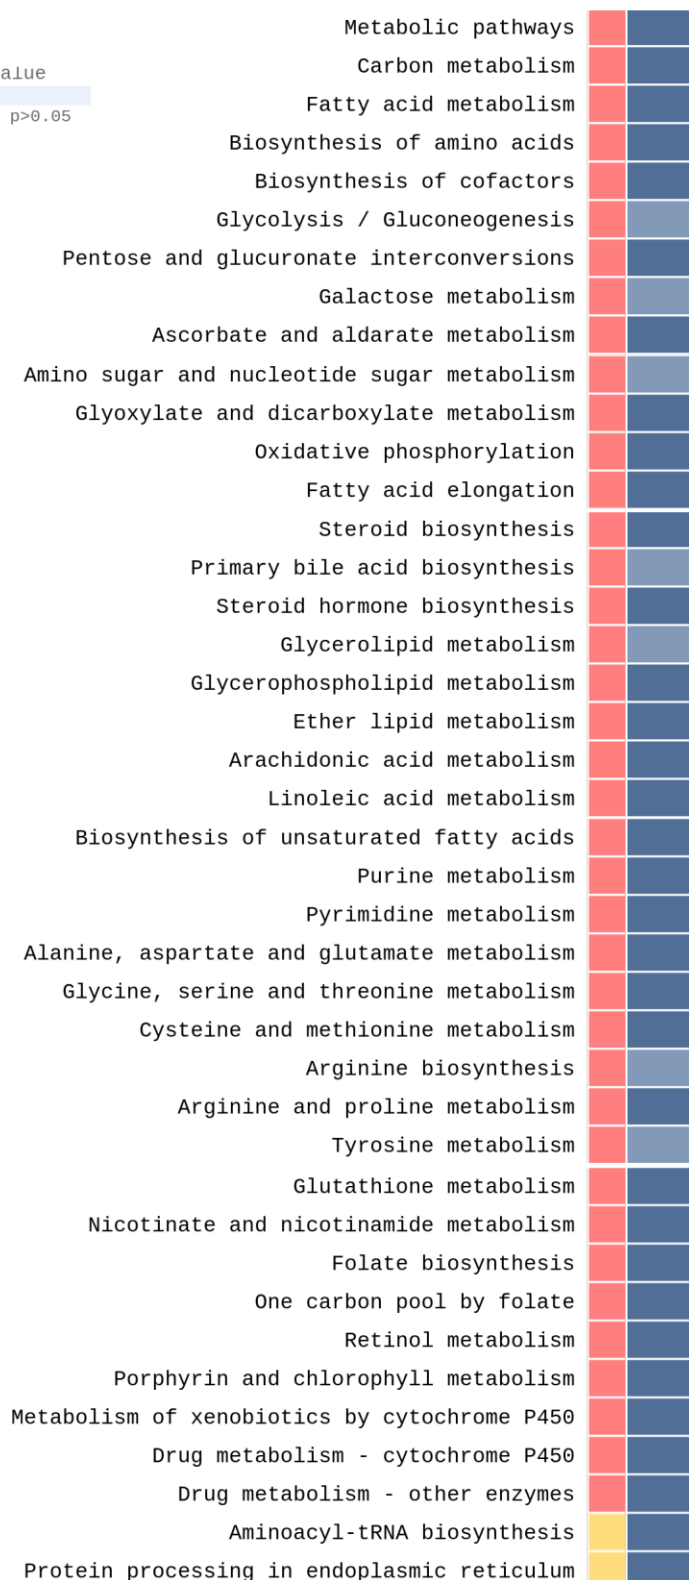

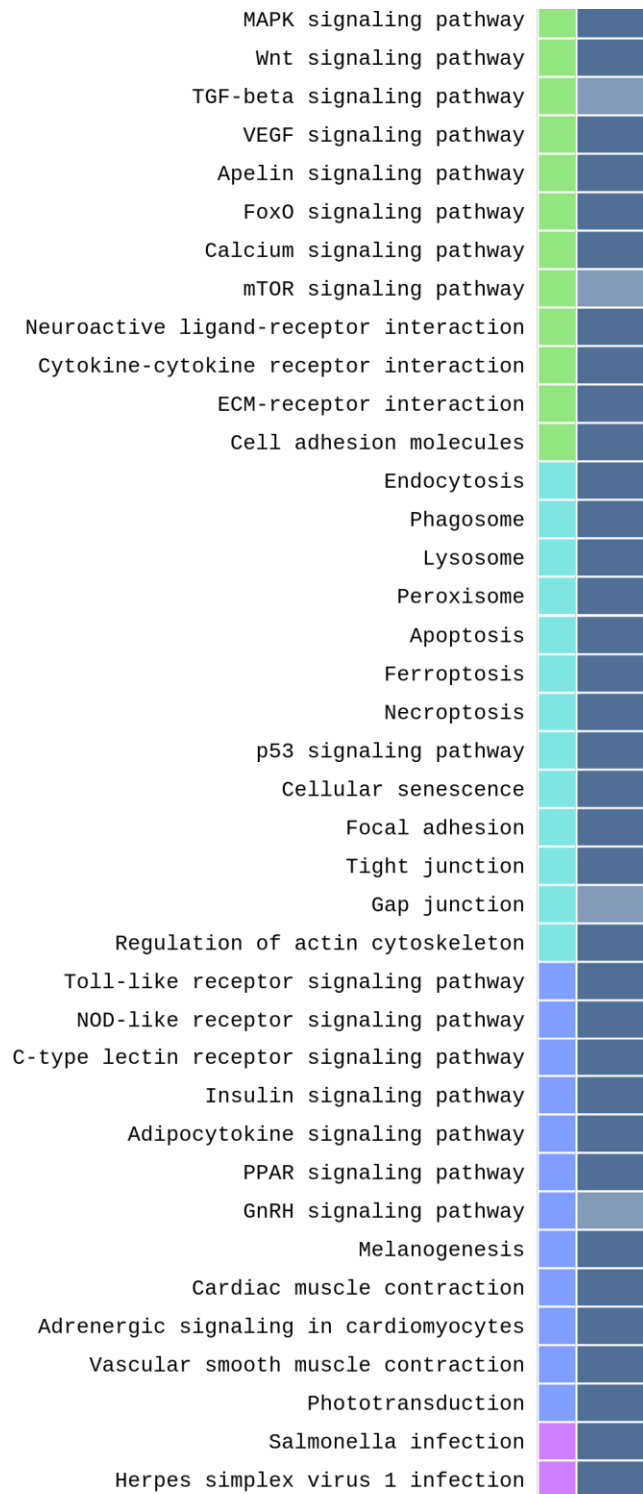

**Figure S3.** Graph showing the list of enriched KEGG pathways after etridiazole treatment.
