# Supplementary material for: Transcriptome Profiling of Etridiazole-Exposed Zebrafish (Danio rerio) Embryos Reveals Pathways Associated with Cardiac and Ocular Toxicities
Source: Int J Mol Sci. 2023 Oct 11;24(20):15067. doi: 10.3390/ijms242015067 (PMC10606920; doi:10.3390/ijms242015067)
Supplement: Supplementary file 1 [file ijms-24-15067-s001.zip › Supplementary data 1.xlsx]

## Sheet: DEGs UTZF vs ETZF
Gene_ID	Transcript_ID	Gene_Symbol	Description	gene_biotype	Protein_ID	ZFIN	locus_tag	Etridiazole/Control.fc	Etridiazole/Control.baseMean	Etridiazole/Control.lfcSE	Etridiazole/Control.stat	Etridiazole/Control.raw.pval	Etridiazole/Control.bh.pval	Etridiazole.mean	Control.mean	N_C1	N_CP2	N_C3	N_ED1	N_ED2	N_ED3	C1_Read_Count	CP2_Read_Count	C3_Read_Count	ED1_Read_Count	ED2_Read_Count	ED3_Read_Count	C1_FPKM	CP2_FPKM	C3_FPKM	ED1_FPKM	ED2_FPKM	ED3_FPKM	C1_TPM	CP2_TPM	C3_TPM	ED1_TPM	ED2_TPM	ED3_TPM
30077	NM_130920,XM_021480010	rbp4	retinol binding protein 4, plasma	protein_coding	NP_570995.1;XP_021335685.1	ZDB-GENE-000210-19	.	-2.15662	465.29	0.224526	-4.93827	7.88194e-07	1.15987e-05	8.20367	9.31234	8.86106	9.00656	9.32665	8.44891	8.51406	8.41406	447	497	725	429	313	290	23.7589	25.7485	40.5933	13.7417	15.251	13.2184	77.2539	80.3145	136.027	44.9619	48.2625	43.6158
30078	NM_130921	nccrp1	non-specific cytotoxic cell receptor protein 1	protein_coding	NP_570996.2	ZDB-GENE-000210-13	.	2.20758	105.917	0.318153	3.59093	0.000329494	0.00222845	7.18733	6.04627	6.24353	6.64969	6.15195	6.88302	6.91698	6.93946	48	87	38	206	145	158	1.22636	2.17089	1.0272	3.1975	3.40777	3.46904	3.98759	6.77142	3.44211	10.462	10.784	11.4465
30095	NM_130932	ckma	creatine kinase, muscle a	protein_coding	NP_571007.2	ZDB-GENE-980526-109	.	2.31981	15529.6	0.283309	4.28511	1.82649e-05	0.000186225	14.4056	13.1917	13.2988	13.8043	13.0842	14.2116	14.1506	14.1285	7099	12360	5047	33700	21141	21858	198.154	337.196	148.596	568.237	541.196	524.146	644.312	1051.78	497.94	1859.23	1712.63	1729.48
30100	NM_001008611	ube2kb	ubiquitin-conjugating enzyme E2Kb (UBC1 homolog, yeast)	protein_coding	NP_001008611.1	ZDB-GENE-980605-9	.	-2.27225	254.355	0.180923	-6.5449	5.95353e-11	1.98777e-09	7.27869	8.4653	8.26923	8.23094	8.14654	7.62654	7.56135	7.55272	343	307	282	245	149	156	10.0307	8.77946	8.67919	4.32965	3.98578	3.90841	32.6156	27.3848	29.0836	14.1663	12.6131	12.8963
30104	NM_130936	klf1	Kruppel-like factor 1 (erythroid)	protein_coding	NP_571011.1	ZDB-GENE-980526-55	.	-3.07526	29.6241	0.44802	-3.6175	0.000297467	0.00204157	3.84065	5.48933	4.92078	5.01705	5.1215	4.62569	4.35618	4.56242	34	38	46	29	7	17	0.582387	0.639212	0.82925	0.298838	0.097832	0.246452	1.89367	1.99382	2.77878	0.977779	0.309594	0.813197
30129	NM_130952	dmrt2a	doublesex and mab-3 related transcription factor 2a	protein_coding	NP_571027.1	ZDB-GENE-990621-7	.	2.02497	71.5941	0.295082	3.44956	0.00056151	0.00349731	6.58224	5.56588	5.70757	5.99408	5.93663	6.29102	6.35598	6.32993	30	49	45	134	99	101	0.640087	1.03215	1.02032	1.74334	1.95314	1.86551	2.08129	3.21946	3.41904	5.7041	6.1808	6.15546
30144	NM_130959	wnt8b	wingless-type MMTV integration site family, member 8b	protein_coding	NP_571034.1	ZDB-GENE-990415-279	.	3.15319	38.6441	0.412435	4.01715	5.89057e-05	0.000513519	5.87281	4.22412	4.77115	4.86179	4.9983	5.55004	5.22186	5.52623	12	15	22	101	40	70	0.424253	0.526073	0.86594	2.28215	1.38188	2.2597	1.37949	1.64092	2.90173	7.46706	4.37301	7.45616
30167	NM_130977	drl	draculin	protein_coding	NP_571052.1	ZDB-GENE-991213-3	.	-2.25966	14.9419	0.586368	-2.00575	0.0448831	0.118289	3.17268	4.38313	4.00879	4.05555	3.82608	3.83491	3.66369	3.62546	21	22	12	21	7	6	0.489607	0.495533	0.283356	0.293031	0.142011	0.117143	1.59199	1.54566	0.949515	0.958777	0.449401	0.386529
30176	NM_130985	twist3	twist3	protein_coding	NP_571060.2	ZDB-GENE-000210-7	.	-3.26653	53.1304	0.457932	-3.72928	0.000192026	0.00140523	4.63877	6.34605	5.92303	6.15627	5.46828	5.16347	5.02303	5.4227	78	100	36	33	14	40	1.86665	2.35516	0.908688	0.472372	0.304245	0.831478	6.06956	7.34618	3.04497	1.54557	0.962795	2.74356
30199	NM_131005	epd	ependymin	protein_coding	NP_571080.1	ZDB-GENE-980526-111	.	-3.99122	225.747	0.233221	-8.56195	1.10971e-17	8.85106e-16	6.50685	8.49407	8.1318	8.17676	7.97335	6.88094	7.10289	7.16899	342	337	271	100	96	113	16.8714	16.2884	14.1092	2.95823	4.31428	4.77621	54.8587	50.8067	47.2793	9.67913	13.6527	15.7597
30202	NM_131008	spon2b	spondin 2b, extracellular matrix protein	protein_coding	NP_571083.4	ZDB-GENE-990415-161	.	-4.64515	110.755	0.417958	-5.30131	1.14977e-07	2.04899e-06	5.2916	7.5105	6.58672	7.5197	6.6159	5.99441	5.96647	5.91029	98	280	97	63	39	37	3.21518	9.03261	3.35514	1.24311	1.17089	1.03001	10.4544	28.1744	11.243	4.06738	3.70532	3.39866
30208	NM_131014,XM_005156049,XM_005156050,XM_009306481,XM_009306483,XM_009306485,XM_017358425,XM_017358426,XM_021480020,XM_021480021	cmn	calymmin	protein_coding	NP_571089.1;XP_005156106.1;XP_005156107.1;XP_009304756.1;XP_009304758.1;XP_009304760.1;XP_017213914.1;XP_017213915.1;XP_021335695.1;XP_021335696.1	ZDB-GENE-000208-9	.	-2.80846	1027.15	0.343404	-4.33827	1.43608e-05	0.000151183	9.07477	10.5652	9.93651	10.7658	9.77386	9.50327	9.34088	9.30093	969	2226	761	927	502	504	10.133	23.486	8.51717	6.05531	4.85379	4.56998	32.9481	73.2573	28.5407	19.8126	15.36	15.0792
30244	NM_131045	en1a	engrailed homeobox 1a	protein_coding	NP_571120.1	ZDB-GENE-980526-216	.	-2.63367	26.1065	0.430743	-3.24341	0.00118109	0.00649373	3.85945	5.23643	4.73648	4.8672	4.85895	4.31187	4.46056	4.4798	29	35	35	15	16	18	0.693094	0.835709	0.891734	0.219008	0.341689	0.37946	2.25365	2.60673	2.98816	0.716581	1.08129	1.25207
30271	NM_131065,XM_005159500	nr1d2b	nuclear receptor subfamily 1, group D, member 2b	protein_coding	NP_571140.1;XP_005159557.1	ZDB-GENE-990415-244	.	-2.22099	4473.4	0.157836	-7.29367	3.01626e-13	1.44347e-11	11.4399	12.5907	12.4324	12.2626	12.413	11.588	11.7568	11.728	6016	4664	5599	3578	2973	3038	68.4751	52.4637	67.7498	24.9541	31.2439	29.902	222.652	163.644	227.027	81.6481	98.8724	98.6653
30280	NM_131073	jak1	Janus kinase 1	protein_coding	NP_571148.1	ZDB-GENE-980526-142	.	2.26815	3859.89	0.134968	8.75402	2.0588e-18	1.75158e-16	12.3874	11.2059	11.4493	11.5391	11.4149	12.1326	12.1875	12.1727	2102	2203	1912	7625	5433	5662	24.1027	24.6862	23.1339	52.8273	57.1408	55.7814	78.3718	77.0009	77.5206	172.847	180.824	184.057
30295	NM_131084	rho	rhodopsin	protein_coding	NP_571159.1	ZDB-GENE-990415-271	.	-10.7735	6419.96	0.265198	-12.9315	2.98856e-38	1.07266e-35	10.0916	13.5202	13.1888	12.5761	13.0139	10.8033	11.1618	10.9564	13552	6773	10817	1189	1410	1090	385.105	188.117	324.27	20.4065	36.7485	26.5971	1252.2	586.771	1086.62	66.7687	116.292	87.7602
30301	NM_131090	her4.2	hairy-related 4, tandem duplicate 2	protein_coding	NP_571165.3	ZDB-GENE-060815-1	.	2.01019	342.214	0.168484	5.97877	2.24827e-09	5.74473e-08	8.83635	7.82866	8.13819	8.02525	8.05978	8.64796	8.64984	8.58992	226	181	193	688	463	457	5.7414	4.5058	5.17405	10.5872	10.8103	10.0054	18.6686	14.0544	17.338	34.6407	34.2094	33.0141
30303	NM_131091	atoh1a	atonal bHLH transcription factor 1a	protein_coding	NP_571166.2	ZDB-GENE-990415-17	.	-2.25584	26.6364	0.447992	-2.61983	0.00879732	0.0336245	4.02323	5.20996	4.96332	4.74493	4.80727	4.5823	4.53225	4.34386	42	26	30	31	18	10	1.12792	0.665745	0.833675	0.489917	0.423879	0.21487	3.6675	2.07658	2.79361	1.60298	1.34138	0.708991
30314	NM_131098,XM_005158086	apoeb	apolipoprotein Eb	protein_coding	NP_571173.1;XP_005158143.1	ZDB-GENE-980526-368	.	2.70644	1544.75	0.181397	7.91853	2.40326e-15	1.50608e-13	11.1396	9.70279	10.1288	9.91654	10.0408	10.8231	11.0103	10.7539	862	609	731	3165	2604	2082	24.9542	19.0905	23.8232	57.5041	76.4212	56.4778	81.1402	59.5467	79.8306	188.15	241.838	186.355
30324	NM_131105	tpma	alpha-tropomyosin	protein_coding	NP_571180.1	ZDB-GENE-990415-269	.	2.57082	10171.1	0.275422	4.94596	7.57678e-07	1.11783e-05	13.8381	12.476	12.63	13.1076	12.4345	13.6384	13.5722	13.5037	4360	7394	3172	23183	14469	14220	139.47	231.158	107.035	447.997	424.501	390.801	453.498	721.026	358.67	1465.82	1343.35	1289.49
30331	NM_131110	cahz	carbonic anhydrase	protein_coding	NP_571185.1	ZDB-GENE-980526-39	.	-2.55595	296.654	0.207994	-6.50914	7.55826e-11	2.4803e-09	7.38354	8.73582	8.6283	8.33664	8.38261	7.6829	7.67728	7.80463	473	316	339	233	154	196	13.5258	8.82924	10.2251	4.02575	4.02475	4.79495	43.9801	27.5401	34.2639	13.172	12.7365	15.8215
30335	NM_131114,XM_005171553	eve1	even-skipped-like1	protein_coding	NP_571189.1;XP_005171610.1	ZDB-GENE-980526-69	.	-2.47001	14.2031	0.594253	-2.19522	0.0281477	0.0830335	3.02586	4.34067	3.7865	4.08204	3.75362	3.62783	3.56286	3.65219	14	27	12	13	6	10	0.365279	0.644359	0.31084	0.191936	0.120704	0.204192	1.18773	2.00988	1.04161	0.628003	0.381974	0.673757
30355	NM_131128	apoa1a	apolipoprotein A-Ia	protein_coding	NP_571203.1	ZDB-GENE-990415-14	.	2.75373	10662.6	0.272602	5.36088	8.28188e-08	1.52194e-06	13.9334	12.4719	12.8255	12.6045	12.8956	13.3165	14.0151	13.4856	5475	3836	5685	15942	22782	13696	251.05	171.897	274.978	441.569	958.038	539.5	816.307	536.178	921.439	1444.79	3031.75	1780.14
30370	NM_131140	fzd2	frizzled class receptor 2	protein_coding	NP_571215.1	ZDB-GENE-990415-224	.	-2.71162	449.192	0.273353	-5.26484	1.40313e-07	2.45105e-06	7.91969	9.35809	8.94325	9.40198	8.72419	8.18032	8.24975	8.33144	523	814	384	322	237	281	9.78076	14.8718	7.57657	3.63672	4.05275	4.50358	31.8028	46.3878	25.3888	11.8991	12.8251	14.8601
30396	NM_131159,XM_017358977,XM_017358978,XM_017358979,XM_017358980	ef1	E74-like factor 1 (ets domain transcription factor)	protein_coding	NP_571234.2;XP_017214466.1;XP_017214467.1;XP_017214468.1;XP_017214469.1	ZDB-GENE-980526-335	.	2.63684	901.091	0.166228	8.41501	3.92849e-17	2.94907e-15	10.3516	8.95293	9.25919	9.37067	9.20772	10.0908	10.1676	9.98779	439	476	389	1939	1416	1228	4.30405	4.56131	4.00493	11.5358	12.7961	10.3904	13.9949	14.2276	13.4204	37.7443	40.4936	34.2845
30413	NM_001313715	opn1lw1	opsin 1 (cone pigments), long-wave-sensitive, 1	protein_coding	NP_001300644.1	ZDB-GENE-990604-41	.	-5.65168	548.488	0.284597	-8.7797	1.63906e-18	1.41545e-16	7.36828	9.8638	9.68452	8.95556	9.44335	7.86429	8.03808	8.1204	1144	485	845	193	169	203	29.4539	12.2077	22.939	2.98779	3.97155	4.47549	95.7716	38.0782	76.8676	9.77584	12.5681	14.7674
30432	NM_131191	smn1	survival of motor neuron 1, telomeric	protein_coding	NP_571266.1	ZDB-GENE-990715-16	.	2.54488	132.276	0.237184	5.68165	1.334e-08	2.89907e-07	7.56802	6.22482	6.61244	6.62652	6.60749	7.4199	7.18408	7.1978	68	65	64	334	168	181	2.93806	2.74199	2.92253	8.73391	6.6426	6.70608	9.55332	8.55278	9.79326	28.5768	21.0207	22.1275
30435	NM_131192	opn1sw2	opsin 1 (cone pigments), short-wave-sensitive 2	protein_coding	NP_571267.1	ZDB-GENE-990604-40	.	-10.9003	3684.47	0.280374	-12.2917	1.00316e-34	2.9169e-32	9.2754	12.7205	12.399	11.6938	12.2381	10.0112	10.3558	10.1317	7911	3585	6405	693	805	602	249.809	110.64	213.34	13.2162	23.291	16.3234	812.272	345.108	714.894	43.2427	73.7053	53.861
30442	NM_131197	ednrba	endothelin receptor Ba	protein_coding	NP_571272.1	ZDB-GENE-980526-16	.	-2.61717	109.278	0.324753	-4.27405	1.91954e-05	0.000194589	5.92501	7.30193	7.03623	6.67177	7.15118	6.09946	6.46904	6.33835	156	90	171	61	77	66	4.58438	2.57243	5.32041	1.07275	2.06276	1.65938	14.9064	8.02389	17.8285	3.50999	6.52769	5.47532
30449	NM_001309823,NM_131204	serpinh1b	serpin peptidase inhibitor, clade H (heat shock protein 47), member 1b	protein_coding	NP_001296752.1;NP_571279.2	ZDB-GENE-990415-93	.	2.95616	2494.72	0.271242	5.76504	8.16388e-09	1.86599e-07	11.8642	10.3008	10.3795	10.9378	10.5358	11.7724	11.485	11.3964	798	1556	944	6871	3383	3249	17.1936	33.1746	21.6213	89.7122	67.7707	60.6548	55.9063	103.478	72.452	293.533	214.463	200.138
30452	NM_001309209,NM_131205,XM_005165860,XM_005165861	etv5b	ets variant 5b	protein_coding	NP_001296138.1;NP_571280.2;XP_005165917.1;XP_005165918.1	ZDB-GENE-991228-4	.	-2.34712	630.844	0.166137	-7.40888	1.27366e-13	6.33276e-12	8.55896	9.7888	9.62084	9.44291	9.56911	8.82466	8.92197	8.79161	877	671	787	540	411	366	13.4478	10.0341	12.7264	4.98773	5.75507	4.81092	43.7266	31.2981	42.6456	16.3195	18.2122	15.8742
30455	NM_131208	lhx3	LIM homeobox 3	protein_coding	NP_571283.1	ZDB-GENE-980526-131	.	2.57806	498.068	0.162209	8.42299	3.67003e-17	2.77317e-15	9.48701	8.12178	8.47141	8.47099	8.42295	9.30572	9.18679	9.16425	260	243	231	1163	683	705	9.2017	8.4133	8.63611	24.9174	22.2083	21.4601	29.92	26.2427	28.9392	81.5282	70.2789	70.8101
30456	NM_131209	pcdh8	protocadherin 8	protein_coding	NP_571284.1	ZDB-GENE-980526-242	.	2.18444	659.586	0.245991	4.58255	4.5934e-06	5.55052e-05	9.82179	8.69405	9.09731	8.63534	9.05202	9.57334	9.47676	9.71405	458	228	411	1305	784	1086	6.5176	3.16939	6.15885	11.2186	10.2314	13.2708	21.1924	9.88591	20.638	36.7064	32.3778	43.7887
30503	NM_131253	opn1mw1	opsin 1 (cone pigments), medium-wave-sensitive, 1	protein_coding	NP_571328.2	ZDB-GENE-990604-42	.	-19.9631	7416.26	0.308541	-13.999	1.58061e-44	1.03738e-41	9.46762	13.7859	13.3821	12.5854	13.2207	10.5167	10.8853	10.5881	16788	7056	13637	768	994	626	473.404	194.459	405.664	13.0685	25.6868	15.1549	1539.31	606.554	1359.36	42.7592	81.287	50.0054
30554	NM_131295	pla2g4aa	phospholipase A2, group IVAa (cytosolic, calcium-dependent)	protein_coding	NP_571370.1	ZDB-GENE-990415-45	.	2.33357	379.267	0.204511	5.97785	2.261e-09	5.77082e-08	9.05284	7.82931	8.07614	8.22259	8.07859	8.6976	8.97558	8.71602	193	221	184	691	638	502	3.27848	3.65505	3.29116	7.08448	9.9266	7.32372	10.6602	11.4008	11.0285	23.18	31.4131	24.1655
30582	NM_131319	opn1sw1	opsin 1 (cone pigments), short-wave-sensitive 1	protein_coding	NP_571394.1	ZDB-GENE-991109-25	.	-18.0081	19958.1	0.285783	-14.5935	3.09023e-48	2.6291e-45	11.0365	15.2067	14.7926	14.1114	14.648	12.0029	12.3759	12.145	43645	20597	36015	2194	2835	2038	1099.74	507.238	957.326	33.3875	65.5006	44.102	3575.88	1582.17	3207.96	109.242	207.279	145.52
30591	NM_131328	hsp90aa1.1	heat shock protein 90, alpha (cytosolic), class A member 1, tandem duplicate 1	protein_coding	NP_571403.1	ZDB-GENE-990415-94	.	3.56832	674.861	0.301127	6.09459	1.09715e-09	2.98965e-08	10.042	8.20706	8.46518	8.9951	8.35082	9.57358	9.69503	9.78177	207	402	164	1371	1052	1224	3.8083	7.24078	3.17892	15.2829	17.8116	19.4095	12.383	22.5854	10.6524	50.0048	56.3654	64.0438
30597	NM_182940	hbae1	hemoglobin, alpha embryonic 1	protein_coding	NP_891985.1	ZDB-GENE-980526-80	.	-4.85141	155.87	0.370637	-6.14726	7.88313e-10	2.20028e-08	5.73623	8.01366	7.3999	7.96424	6.99405	6.3673	6.46131	6.34872	203	358	116	76	59	51	16.7214	28.8746	10.1018	3.76651	4.43562	3.57683	54.3709	90.0651	33.8506	12.3238	14.0367	11.8022
30598	NM_131333,XM_005158663	vsx1	visual system homeobox 1 homolog, chx10-like	protein_coding	NP_571408.1;XP_005158720.1	ZDB-GENE-990415-205	.	2.28495	1647.78	0.277292	4.29929	1.71346e-05	0.000176186	11.1627	9.97019	10.4911	9.80852	10.26	10.8395	10.9252	10.9986	1273	483	910	3079	2272	2609	35.6397	13.2304	26.9065	52.0743	58.31	62.6535	115.885	41.268	90.1625	170.384	184.524	206.733
30600	NM_131335	mid1ip1a	MID1 interacting protein 1a	protein_coding	NP_571410.1	ZDB-GENE-990415-81	.	2.85527	125.384	0.319671	4.73495	2.1911e-06	2.87611e-05	7.53597	6.02632	6.30956	6.45644	6.60042	7.39786	7.2681	6.84405	45	55	71	348	201	123	1.60863	1.92939	2.6852	7.52931	6.60517	3.77569	5.23057	6.01811	8.99799	24.6354	20.9023	12.4583
30601	NM_183066	hbae3	hemoglobin alpha embryonic-3	protein_coding	NP_898889.2	ZDB-GENE-990706-3	.	-2.81172	673.358	0.357564	-4.17115	3.03064e-05	0.000289828	8.46535	9.95604	9.51363	10.1095	8.99835	8.61544	8.82563	8.87948	790	1405	407	416	371	422	59.0749	102.789	32.1247	18.792	25.4618	27.1106	192.086	320.618	107.649	61.4862	80.5748	89.4548
30604	NM_131338,XM_021468751	cfb	complement factor B	protein_coding	NP_571413.2;XP_021324426.1	ZDB-GENE-980526-487	.	9.10703	425.148	0.326568	9.759	1.68804e-22	2.1189e-20	9.58171	6.39278	7.3592	7.14753	7.42367	8.52942	9.38852	8.97481	83	51	88	660	1108	765	1.49888	0.888238	1.65358	7.18978	18.364	11.8842	4.87373	2.77058	5.54108	23.5245	58.1137	39.2134
30642	XM_689471	gdf7	growth differentiation factor 7	protein_coding	XP_694563.2	ZDB-GENE-990714-1	.	-2.01366	54.4221	0.336618	-2.9999	0.00270072	0.0129139	5.1837	6.17989	5.94046	6.01301	5.73377	5.34863	5.58528	5.55437	70	73	48	39	42	42	0.721722	0.741493	0.522606	0.243269	0.394231	0.371497	2.34673	2.31286	1.75123	0.795962	1.24756	1.2258
30648	NM_131375	psme1	proteasome activator subunit 1	protein_coding	NP_571450.1	ZDB-GENE-991110-17	.	2.10623	23.1233	0.457091	2.35109	0.0187184	0.0607317	4.97032	3.89705	4.23629	4.37738	4.41685	4.59762	4.59091	4.72768	9	14	16	42	28	39	0.356376	0.549208	0.672355	1.03096	1.02291	1.34096	1.15878	1.71308	2.25303	3.37325	3.23705	4.42464
30671	NM_131397	hsp70.3	heat shock cognate 70-kd protein, tandem duplicate 3	protein_coding	NP_571472.2	ZDB-GENE-110713-1	.	75.5774	9107.95	0.205444	30.3726	1.26282e-202	9.66943e-199	14.1339	7.89503	9.99274	10.1506	10.0594	13.1307	13.3358	13.4381	171	253	200	22312	18244	21310	3.19012	4.61315	3.93754	251.612	312.346	341.757	10.3729	14.3893	13.1945	823.258	988.432	1127.67
30689	NM_131415	epha2a	eph receptor A2 a	protein_coding	NP_571490.1	ZDB-GENE-990415-63	.	3.07059	719	0.181611	8.91201	5.01159e-19	4.46207e-17	10.083	8.46494	8.71083	8.97906	8.86271	9.73236	9.82054	9.77483	262	356	309	1522	1126	1134	3.22835	4.29884	4.0174	11.3605	12.7557	12.0392	10.4972	13.4089	13.4621	37.1708	40.3661	39.7246
30708	NM_131431,XM_005170903	fabp2	fatty acid binding protein 2, intestinal	protein_coding	NP_571506.1;XP_005170960.1	ZDB-GENE-991019-5	.	-3.40157	200.849	0.322764	-5.47211	4.44716e-08	8.67196e-07	6.51532	8.27716	8.00508	7.39965	8.14958	6.8391	7.02	7.06387	320	143	358	108	96	109	20.3433	8.44945	24.5457	3.89853	4.88179	5.52817	66.1477	26.3554	82.2515	12.7557	15.4486	18.2409
30735	NM_131451,XM_009306383,XM_017358430	irbp	interphotoreceptor retinoid-binding protein	protein_coding	NP_571526.2;XP_009304658.1;XP_017213919.1	ZDB-GENE-990415-132	.	-4.39446	1272.55	0.273172	-7.8181	5.36286e-15	3.15872e-13	8.88242	11.0176	10.8306	10.1021	10.7838	9.34714	9.45541	9.3575	2362	996	2139	658	512	473	41.6749	17.0984	39.6777	6.47414	7.88035	6.60589	135.509	53.3333	132.958	21.183	24.9377	21.7969
30757	NM_131471	mhc1uba	major histocompatibility complex class I UBA	protein_coding	NP_571546.1	ZDB-GENE-990415-145	.	3.72292	38.4127	0.415414	4.56517	4.99082e-06	5.98977e-05	5.91911	4.02813	4.81032	4.78962	4.82922	5.60875	5.49374	5.18171	15	13	15	113	65	41	0.332766	0.27944	0.342608	1.57389	1.37429	0.793808	1.08201	0.871625	1.14806	5.14968	4.34899	2.61926
30767	NM_131479,XM_005163793,XM_005163794,XM_005163795,XM_005163796,XM_021469347	stat3	signal transducer and activator of transcription 3 (acute-phase response factor)	protein_coding	NP_571554.1;XP_005163850.2;XP_005163851.2;XP_005163852.2;XP_005163853.1;XP_021325022.1	ZDB-GENE-980526-68	.	4.03358	3106.56	0.222922	9.02585	1.78302e-19	1.70657e-17	12.2816	10.2696	10.5692	10.9694	10.6413	11.8544	12.0407	11.8448	882	1422	930	6863	5610	4825	9.25269	16.1901	10.7364	52.4396	58.1077	47.2533	30.0858	50.4999	35.9774	171.579	183.884	155.918
30768	NM_131480	stat1a	signal transducer and activator of transcription 1a	protein_coding	NP_571555.1	ZDB-GENE-980526-499	.	2.14058	1297.92	0.138943	7.90258	2.73185e-15	1.69604e-13	10.789	9.69084	9.92713	9.91569	9.97596	10.5623	10.6373	10.5302	742	684	751	2564	1870	1757	12.944	11.6653	13.8254	27.0396	29.9458	26.3468	42.0883	36.3864	46.3282	88.4717	94.7647	86.9343
57933	NM_131505	caspa	caspase a	protein_coding	NP_571580.1	ZDB-GENE-000616-3	.	2.30134	23.7878	0.447344	2.68802	0.0071876	0.0286731	5.04986	3.85304	4.35916	4.44949	4.27721	4.75155	4.63379	4.69814	13	16	9	54	29	35	0.369903	0.451404	0.268571	0.970428	0.786966	0.873061	1.20277	1.40801	0.899972	3.17518	2.49038	2.88077
58022	NM_131510,XM_005165837	casp8	caspase 8, apoptosis-related cysteine peptidase	protein_coding	NP_571585.2;XP_005165894.1	ZDB-GENE-000713-1	.	2.29974	186.484	0.205251	5.85367	4.80854e-09	1.15059e-07	8.02183	6.821	7.03538	7.16828	7.22151	7.74012	7.75508	7.80024	87	100	110	371	254	284	1.84768	2.06883	2.48734	4.85857	5.01684	5.24744	6.00786	6.45307	8.33497	15.8969	15.876	17.3146
58045	NM_001328159,NM_131530,XM_005172774	hoxc6b	homeobox C6b	protein_coding	NP_001315088.1;NP_571605.2;XP_005172831.1	ZDB-GENE-000822-1	.	-2.42687	572.04	0.309727	-4.12976	3.63142e-05	0.000340618	8.38283	9.66228	9.2976	9.78547	8.89984	8.67008	8.57166	8.73416	666	1065	394	499	292	385	6.92695	10.8371	4.31906	3.35094	2.91792	3.58503	22.5235	33.8028	14.473	10.964	9.23386	11.8292
58054	NM_131539	pim2	Pim-2 proto-oncogene, serine/threonine kinase	protein_coding	NP_571614.2	ZDB-GENE-000831-6	.	7.97764	601.296	0.221975	13.4969	1.6316e-41	7.4959e-39	10.0616	7.06543	7.81787	7.90469	7.98755	9.36015	9.76356	9.47373	105	114	133	1291	1325	1037	1.85996	1.96802	2.48547	13.8234	21.5371	15.7971	6.0478	6.13863	8.32869	45.2294	68.1549	52.1245
58062	NM_131545	hoxc12b	homeobox C12b	protein_coding	NP_571620.1	ZDB-GENE-000329-17	.	-2.52404	21.3702	0.606562	-2.20214	0.0276552	0.0821289	3.59516	4.93807	4.31512	4.82342	4.12619	4.12009	4.01149	4.18045	20	49	11	19	8	16	0.997011	2.42435	0.558541	0.586822	0.374855	0.681168	3.24185	7.56198	1.87165	1.92005	1.18624	2.2476
58068	NM_131550	pcxb	pyruvate carboxylase b	protein_coding	NP_571625.2	ZDB-GENE-000831-1	.	-2.49829	751.171	0.232907	-5.67154	1.41523e-08	3.05282e-07	8.74803	10.0666	9.89938	9.55686	9.91972	8.83522	9.15338	9.12754	1087	690	1057	473	487	499	8.50913	5.28126	8.73336	2.23581	3.49576	3.35501	27.668	16.4732	29.2651	7.31544	11.0625	11.0703
58085	NM_131566	prph2a	peripherin 2a (retinal degeneration, slow)	protein_coding	NP_571641.1	ZDB-GENE-000616-8	.	-4.98367	2734.75	0.317602	-7.29596	2.96544e-13	1.42211e-11	9.83688	12.1532	11.9879	11.2287	11.8248	10.1024	10.6363	10.3065	5448	2262	4379	904	1285	870	98.5697	39.9917	83.5662	9.87151	21.3135	13.5125	320.506	124.742	280.027	32.2989	67.4474	44.586
58094	NM_131573,XM_017357715	dap1b	death associated protein 1b	protein_coding	NP_571648.1;XP_017213204.1	ZDB-GENE-000511-4	.	2.25629	554.793	0.205947	5.70026	1.19626e-08	2.61956e-07	9.58703	8.41144	8.79182	8.55708	8.69846	9.21347	9.52112	9.29475	357	243	300	967	920	755	20.7316	13.7793	18.3888	34.1665	49.0065	37.8559	67.4103	42.9801	61.6201	111.791	155.083	124.91
58112	NM_131589	nkx2.4b	NK2 homeobox 4b	protein_coding	NP_571664.1	ZDB-GENE-000830-1	.	2.27644	118.663	0.287708	4.12495	3.70818e-05	0.000346262	7.36368	6.18246	6.42932	6.438	6.66852	7.30791	6.97187	6.95012	57	54	80	317	140	144	2.17428	1.9822	3.20331	7.30602	4.90291	4.72014	7.06983	6.18285	10.7342	23.9048	15.5155	15.5747
58114	NM_131591	actc1b	actin, alpha, cardiac muscle 1b	protein_coding	NP_571666.1	ZDB-GENE-000322-1	.	2.79112	56564.7	0.315966	4.68672	2.77613e-06	3.55664e-05	16.3458	14.865	15.0916	15.5534	14.6925	16.1084	16.0639	15.9903	24456	40487	13292	130030	83113	81282	854.394	1382.44	489.856	2744.19	2663.01	2439.52	2778.12	4312.08	1641.49	8978.83	8427.2	8049.48
58120	NM_131597,XM_021468514	nme6	NME/NM23 nucleoside diphosphate kinase 6	protein_coding	NP_571672.2;XP_021324189.1	ZDB-GENE-000710-3	.	-2.04258	85.2409	0.291345	-3.53666	0.000405214	0.00265872	5.80834	6.83849	6.51034	6.58725	6.63319	6.06628	5.94011	6.29263	95	99	107	77	40	79	3.57021	3.63786	4.28517	1.76324	1.35988	2.55408	11.6088	11.3472	14.3594	5.76921	4.30338	8.42748
58126	NM_131603,XM_021475829,XM_021475832	runx1	runt-related transcription factor 1	protein_coding	NP_571678.1;XP_021331504.1;XP_021331507.1	ZDB-GENE-000605-1	.	3.08528	234.912	0.233732	6.95411	3.54783e-12	1.46314e-10	8.47065	6.84644	7.2333	7.17989	7.42361	8.23693	8.20708	7.9566	97	83	123	583	379	299	1.26308	1.41145	1.87096	5.1159	5.75392	3.3579	4.107	4.40257	6.26952	16.7389	18.2085	11.0798
58148	NM_131624	slc34a2a	solute carrier family 34 (type II sodium/phosphate cotransporter), member 2a	protein_coding	NP_571699.1	ZDB-GENE-000524-1	.	-11.5083	98.0765	0.359866	-9.79421	1.19229e-22	1.52156e-20	3.9734	7.49542	6.74055	6.63904	7.07831	5.35591	5.5	5.22054	147	122	206	24	22	9	2.47569	2.0038	3.66783	0.24192	0.336134	0.121083	8.04987	6.25024	12.2907	0.791547	1.06371	0.399529
58215	NM_131631,XM_021468899	fech	ferrochelatase	protein_coding	NP_571706.1;XP_021324574.1	ZDB-GENE-000928-1	.	-2.13965	390.315	0.214914	-5.1061	3.28876e-07	5.33974e-06	7.95826	9.05509	8.59834	9.00236	8.84075	8.16269	8.19731	8.28718	370	555	469	341	239	286	5.61112	8.19077	8.07415	4.66573	4.2237	4.16892	18.245	25.5485	27.0561	15.266	13.3661	13.7558
60632	NM_001007185,XM_005163660	wnt3a	wingless-type MMTV integration site family, member 3A	protein_coding	NP_001007186.1;XP_005163717.1	ZDB-GENE-001106-1	.	2.15959	156.776	0.331751	3.34816	0.000813504	0.00476223	7.74436	6.63115	7.19628	6.52505	6.92663	7.47072	7.54346	7.43816	135	42	87	310	228	212	1.52629	0.51339	1.06052	2.38056	2.36827	2.06686	4.96283	1.60136	3.55376	7.78903	7.49448	6.81985
60635	NM_131637	cldn7b	claudin 7b	protein_coding	NP_571712.1	ZDB-GENE-001103-5	.	2.63985	123.223	0.254168	5.50997	3.58902e-08	7.11947e-07	7.48109	6.08288	6.38625	6.51721	6.57384	7.2255	7.26196	7.00834	51	60	67	281	198	152	1.15335	1.31833	1.58431	3.84067	4.10962	2.93802	3.75021	4.1121	5.30894	12.5664	13.005	9.69434
60636	NM_131638,XM_005170922,XM_005170923	pax5	paired box 5	protein_coding	NP_571713.1;XP_005170979.1;XP_005170980.1	ZDB-GENE-001030-2	.	2.11729	597.75	0.258926	4.17965	2.91962e-05	0.000280378	9.66557	8.58258	8.94799	8.46071	8.98797	9.36047	9.47435	9.48708	410	195	410	1090	833	895	6.60237	3.23618	6.87224	11.2997	12.5173	12.7414	21.4681	10.0943	23.0286	36.9719	39.6116	42.0419
60641	NM_131643	sox9a	SRY (sex determining region Y)-box 9a	protein_coding	NP_571718.1	ZDB-GENE-001103-1	.	2.02347	1816.42	0.236244	4.30415	1.6763e-05	0.000173062	11.2474	10.231	10.2236	10.7103	10.3446	11.1655	11.0013	10.9526	818	1415	913	4100	2292	2298	20.176	34.1079	23.7462	61.1111	51.8597	48.6947	65.6036	106.389	79.5724	199.952	164.112	160.674
64264	NM_175576	plp1a	proteolipid protein 1a	protein_coding	NP_783166.1	ZDB-GENE-001202-1	.	-2.06588	256.396	0.32443	-3.22644	0.0012534	0.00684053	7.3898	8.4308	8.44422	8.06697	8.00483	7.25317	7.87828	7.6491	422	254	239	141	232	181	4.07059	2.39443	2.42833	0.818515	2.05406	1.4967	13.2358	7.46866	8.13722	2.67813	6.50016	4.93856
64269	NM_131669,XM_021469844	atp1b2a	ATPase, Na+/K+ transporting, beta 2a polypeptide	protein_coding	NP_571744.1;XP_021325519.1	ZDB-GENE-001127-2	.	-2.34873	11203.9	0.234188	-5.26021	1.43888e-07	2.50588e-06	12.7082	13.9399	13.8695	13.4901	13.7107	12.7072	13.1356	13.0238	17204	10607	13776	6977	8106	7483	201.16	123.608	172.521	51.2901	89.3656	77.1431	654.085	385.557	578.109	167.818	282.801	254.543
64274	NM_131672,XM_021481056,XM_021481057	csf1ra	colony stimulating factor 1 receptor, a	protein_coding	NP_571747.1;XP_021336731.1;XP_021336732.1	ZDB-GENE-001205-1	.	2.01504	560.892	0.22133	4.56697	4.94825e-06	5.95111e-05	9.55025	8.53932	8.78222	8.95537	8.52789	9.29336	9.31914	9.41419	345	403	231	1043	721	851	4.23459	4.84934	2.96588	7.72044	8.14141	9.12164	13.7691	15.126	9.93854	25.2608	25.7638	30.0979
64607	NM_131682	alas2	aminolevulinate, delta-, synthase 2	protein_coding	NP_571757.1	ZDB-GENE-001229-1	.	-4.28143	142.031	0.260181	-8.06398	7.38496e-16	4.86074e-14	5.76156	7.8443	7.39312	7.45651	7.38414	6.19488	6.43283	6.52445	205	207	193	55	57	71	3.63274	3.58335	3.60834	0.583103	0.912979	1.06926	11.8121	11.1772	12.0914	1.90787	2.88916	3.52816
64611	NM_131685	atp1a3b	ATPase, Na+/K+ transporting, alpha 3b polypeptide	protein_coding	NP_571760.2	ZDB-GENE-001212-8	.	-2.83199	3492.06	0.130698	-11.4907	1.46885e-30	3.34069e-28	10.8318	12.3336	12.0624	12.0649	12.0413	11.1742	11.2284	11.1201	4742	4450	4406	2685	1930	1775	43.598	39.9913	42.738	14.9095	16.2702	14.0222	141.762	124.74	143.213	48.7829	51.4877	46.2679
64613	NM_131687	atp1a1a.2	ATPase, Na+/K+ transporting, alpha 1a polypeptide, tandem duplicate 2	protein_coding	NP_571762.1	ZDB-GENE-001212-2	.	2.31355	387.486	0.34297	3.52831	0.000418221	0.0027308	9.07959	7.86995	7.86009	7.8024	8.56649	8.85896	8.75571	8.8274	142	121	351	838	500	575	1.93234	1.60741	5.03204	6.88296	6.23622	6.72213	6.28315	5.01381	16.8621	22.5206	19.7347	22.1805
64671	NM_131692	cmlc1	cardiac myosin light chain-1	protein_coding	NP_571767.2	ZDB-GENE-030522-1	.	2.14854	61.6019	0.282975	3.89912	9.65415e-05	0.000785011	6.39341	5.29059	5.63735	5.686	5.66328	6.11925	6.13005	6.09932	34	35	34	124	85	86	1.84796	1.8631	1.94834	4.09075	4.27451	4.0433	6.00879	5.81135	6.52879	13.3847	13.5268	13.3413
64698	NM_131697	dcn	decorin	protein_coding	NP_571772.1	ZDB-GENE-010102-1	.	-2.25421	868.393	0.237485	-4.93767	7.90628e-07	1.16197e-05	9.06029	10.2323	9.94172	10.2705	9.69503	9.24172	9.36721	9.34557	1033	1389	738	711	561	578	19.1737	25.2082	14.4588	7.97445	9.5529	9.21602	62.3446	78.6292	48.4507	26.0919	30.2305	30.4093
65223	NM_131708	try	trypsin	protein_coding	NP_571783.2	ZDB-GENE-010131-7	.	-3.73614	186.942	0.370385	-5.13399	2.83671e-07	4.67781e-06	6.30865	8.2027	8.07076	7.25633	7.88084	6.57389	7.04446	6.75231	369	130	284	78	112	75	18.9705	6.4997	15.4127	2.40064	5.252	3.31682	61.6841	20.2738	51.6474	7.85474	16.6201	10.9442
65228	NM_131713	aspn	asporin (LRR class 1)	protein_coding	NP_571788.2	ZDB-GENE-041105-7	.	-2.51499	112.393	0.324892	-4.09537	4.21502e-05	0.000386058	6.00427	7.3273	6.86836	7.27849	6.81501	6.16621	6.38072	6.53483	122	191	108	66	64	87	2.72873	4.17536	2.55991	0.886208	1.31281	1.6741	8.87267	13.0237	8.57816	2.89962	4.15445	5.52391
79378	NM_213162	agxtb	alanine-glyoxylate aminotransferase b	protein_coding	NP_998327.1	ZDB-GENE-010302-3	.	-3.65571	302.58	0.22415	-8.34333	7.22288e-17	5.1849e-15	7.02627	8.8912	8.62986	8.29598	8.61185	7.40365	7.58836	7.54906	488	312	455	162	143	143	13.7091	8.55074	13.4706	2.7463	3.67431	3.43508	44.5761	26.6713	45.1393	8.98573	11.6275	11.3345
79381	NM_131734	gstp1	glutathione S-transferase pi 1	protein_coding	NP_571809.1	ZDB-GENE-020806-4	.	3.64749	707.256	0.195282	9.56003	1.17719e-21	1.35206e-19	10.1164	8.25	8.79413	8.65645	8.67896	9.93428	9.74803	9.59524	312	240	252	1957	1074	960	15.1749	11.4108	12.9213	57.549	47.9209	40.1386	49.3422	35.5924	43.2986	188.297	151.648	132.442
81538	NM_198073	hbbe1.1	hemoglobin beta embryonic-1.1	protein_coding	NP_932339.1	ZDB-GENE-030616-7	.	-3.77258	882.224	0.29289	-6.54018	6.14464e-11	2.04563e-09	8.53162	10.4454	10.1699	10.3318	9.59565	8.76304	9.099	9.04056	1407	1563	704	400	431	422	106.178	115.333	56.0108	18.2283	29.8314	27.3347	345.246	359.744	187.69	59.6418	94.4026	90.1942
81580	NM_131762	cldna	claudin a	protein_coding	NP_571837.2	ZDB-GENE-010328-1	.	-2.08733	63.6013	0.288735	-3.67693	0.000236057	0.00167206	5.36293	6.42709	6.06228	6.26708	6.10484	5.71884	5.73412	5.65388	69	87	70	63	43	39	1.62092	2.01572	1.73481	0.899654	0.920156	0.790718	5.27055	6.2874	5.81328	2.94361	2.91187	2.60907
81581	NM_131763	cldnb	claudin b	protein_coding	NP_571838.1	ZDB-GENE-010328-2	.	3.7525	253.082	0.289944	6.58008	4.70206e-11	1.60492e-09	8.64242	6.73554	6.98438	7.2249	7.48382	8.23187	8.4303	8.09309	61	87	131	569	478	345	2.36682	3.28101	5.34922	13.3793	17.0874	11.5537	7.69588	10.2341	17.925	43.7764	54.0738	38.1229
81582	NM_131764	cldnc	claudin c	protein_coding	NP_571839.1	ZDB-GENE-010328-3	.	2.37529	77.9809	0.364366	3.42542	0.000613856	0.00376324	6.78047	5.5245	6.05763	5.81931	5.82554	6.19709	6.76474	6.33004	55	33	34	111	161	96	1.29381	0.760467	0.855737	1.59597	3.50406	1.96511	4.20693	2.37204	2.86754	5.22191	11.0887	6.48412
81584	NM_131765	cldne	claudin e	protein_coding	NP_571840.1	ZDB-GENE-010328-5	.	2.26546	222.908	0.264659	4.45782	8.27968e-06	9.36909e-05	8.27214	7.09456	7.14828	7.42402	7.56401	8.11733	8.08372	7.82733	85	122	151	512	331	257	1.92485	2.68969	3.59927	7.01175	6.88992	5.01182	6.25879	8.38966	12.061	22.942	21.8034	16.5371
81589	NM_131769	cldnj	claudin j	protein_coding	NP_571844.2	ZDB-GENE-010328-10	.	-2.39099	26.8348	0.419198	-3.00003	0.00269955	0.012911	3.97044	5.2477	4.85517	4.92023	4.81581	4.56412	4.39221	4.50027	34	36	30	29	11	17	0.877515	0.907169	0.804496	0.443867	0.260377	0.381996	2.8533	2.82963	2.69583	1.45231	0.823973	1.26044
81590	NM_131770	cldn1	claudin 1	protein_coding	NP_571845.1	ZDB-GENE-010328-11	.	2.54986	111.497	0.392356	3.44182	0.000577822	0.00358107	7.32273	5.97511	5.92482	6.36838	6.64211	7.06973	7.08227	6.82588	23	55	86	257	176	134	1.37924	3.31851	5.56268	9.59776	9.96659	7.07875	4.48471	10.3511	18.6403	31.4033	31.5396	23.3572
81886	NM_131779	vipr2	vasoactive intestinal peptide receptor 2	protein_coding	NP_571854.1	ZDB-GENE-010406-4	.	-2.02104	131.158	0.250334	-4.05496	5.0143e-05	0.000444723	6.44648	7.45205	7.17712	7.18069	7.28554	6.54689	6.86898	6.70967	152	143	166	98	108	90	5.06413	4.6512	5.815	1.95738	3.29081	2.55804	16.4664	14.508	19.4858	6.40441	10.4139	8.44055
83412	NM_131781,XM_017355860,XR_002458693	glrba	glycine receptor, beta a	protein_coding	NP_571856.1;XP_017211349.1	ZDB-GENE-010410-2	.	-2.67228	195.477	0.205169	-6.91174	4.7873e-12	1.9259e-10	6.73275	8.15278	7.81766	7.89605	7.84245	7.12056	7.00523	7.20828	249	256	244	159	88	128	4.4242	4.42486	4.60499	1.70056	1.42896	2.00825	14.3856	13.802	15.4311	5.56411	4.522	6.62645
83776	NM_131788,XM_005155405	cry5	cryptochrome circadian clock 5	protein_coding	NP_571863.1;XP_005155462.1	ZDB-GENE-010426-8	.	-2.44975	88.0364	0.403841	-3.20086	0.00137019	0.00737976	5.67183	6.96687	6.40286	7.01219	6.31345	6.02452	5.80574	6.21846	84	173	70	75	32	73	1.6637	3.8518	1.36554	1.23212	0.537538	1.16329	5.40965	12.0145	4.57586	4.03142	1.70106	3.83843
83780	NM_131792,XM_009295768,XM_021469382	cry1bb	cryptochrome circadian clock 1bb	protein_coding	NP_571867.2;XP_009294043.2;XP_021325057.1	ZDB-GENE-010426-5	.	-2.09758	635.97	0.171849	-6.219	5.00336e-10	1.44006e-08	8.68061	9.75091	9.41378	9.65556	9.52824	8.98446	8.89663	8.8999	682	841	740	652	389	414	8.71574	10.8106	9.93292	5.04747	4.79892	4.69346	28.3399	33.7203	33.2848	16.515	15.1864	15.4866
84040	NM_199524,XM_005161114	clic3	chloride intracellular channel 3	protein_coding	NP_955818.1;XP_005161171.1	ZDB-GENE-010507-2	.	2.24303	37.6266	0.450619	2.58633	0.00970047	0.0363388	5.6992	4.54213	4.81029	4.98011	5.06539	5.54251	5.44365	5.02745	14	21	26	101	59	29	0.328232	0.491285	0.679569	1.57248	1.45022	0.638254	1.06727	1.53241	2.27721	5.14504	4.58929	2.106
84702	NM_131802	cp	ceruloplasmin	protein_coding	NP_571877.1	ZDB-GENE-010522-1	.	4.18529	439.143	0.315851	6.53893	6.19606e-11	2.05679e-09	9.46983	7.40253	8.05196	7.70527	7.97536	8.63898	9.42709	8.98465	187	102	159	643	1031	679	2.45791	1.31007	2.20016	5.10445	12.4349	7.67371	7.99206	4.08636	7.37265	16.7014	39.3509	25.3203
84703	NM_198338	slc4a1a	solute carrier family 4 (anion exchanger), member 1a (Diego blood group)	protein_coding	NP_938152.1	ZDB-GENE-010525-1	.	-2.65327	242.021	0.279419	-5.03822	4.6988e-07	7.27332e-06	7.04934	8.45775	7.91262	8.49151	7.9534	7.39395	7.36648	7.44172	240	440	240	194	124	147	3.04707	5.4693	3.21708	1.48531	1.44484	1.60485	9.90775	17.0598	10.7803	4.85984	4.57225	5.29541
114403	NM_131809	gja8b	gap junction protein alpha 8 paralog b	protein_coding	NP_571884.2	ZDB-GENE-010607-3	.	-4.43305	153.124	0.309785	-6.93481	4.06773e-12	1.65088e-10	5.80909	7.96682	7.42516	7.71741	7.38515	6.55131	6.18375	6.58091	204	268	185	99	31	73	3.802	4.88649	3.64355	1.11099	0.526403	1.16139	12.3625	15.2419	12.2094	3.63509	1.66582	3.83216
114404	NM_131810,XM_005166218,XM_021476749	cx44.2	connexin 44.2	protein_coding	NP_571885.2;XP_005166275.1;XP_021332424.1	ZDB-GENE-010619-1	.	-2.33554	29.0202	0.395732	-3.09239	0.0019855	0.0100504	4.12218	5.34435	4.97987	4.99978	4.96057	4.60238	4.67939	4.52156	37	36	34	26	21	14	0.657004	0.791092	0.68848	0.282202	0.346678	0.255005	2.1363	2.46757	2.30707	0.923347	1.09708	0.84142
114405	NM_131811	cx27.5	connexin 27.5	protein_coding	NP_571886.1	ZDB-GENE-010619-2	.	-2.52671	17.2043	0.530148	-2.52243	0.0116548	0.0417925	3.29203	4.62139	4.25375	4.20609	4.09458	3.86615	3.98353	3.77635	26	22	17	14	14	6	0.832608	0.660692	0.546245	0.270382	0.408169	0.143274	2.70729	2.06082	1.83045	0.884673	1.29167	0.47275
114418	NM_173231	crybb1	crystallin, beta B1	protein_coding	NP_775338.2	ZDB-GENE-010813-1	.	-8.33304	21075.7	0.308919	-9.90176	4.09029e-23	5.36904e-21	12.1409	15.1998	14.3423	15.1208	14.3665	12.844	12.7111	13.0781	24331	50296	23734	6215	3378	6197	1147.93	2319.27	1181.3	177.134	146.152	251.174	3732.56	7234.24	3958.48	579.571	462.502	828.78
114421	NM_131818,XM_021476750,XM_021476751	angptl3	angiopoietin-like 3	protein_coding	NP_571893.2;XP_021332425.1;XP_021332426.1	ZDB-GENE-010817-3	.	-2.43274	323.505	0.306431	-4.18555	2.84475e-05	0.000274566	7.55941	8.8404	8.40092	8.87396	8.24848	7.7368	7.81205	8.05893	347	581	273	222	168	257	3.9732	6.52414	3.68926	1.95109	2.63602	2.68882	12.9192	20.35	12.3625	6.38384	8.34179	8.87208
114424	NM_131820	cdh1	cadherin 1, type 1, E-cadherin (epithelial)	protein_coding	NP_571895.1	ZDB-GENE-010606-1	.	2.24726	1032.8	0.163501	7.14469	9.01979e-13	4.04675e-11	10.4814	9.31289	9.48673	9.59271	9.65413	10.1629	10.3363	10.2592	513	552	607	1899	1547	1504	6.85813	7.20446	8.55531	15.3369	18.9696	17.2674	22.2997	22.4721	28.6685	50.1812	60.03	56.9759
114426	NM_131801	odc1	ornithine decarboxylase 1	protein_coding	NP_571876.1	ZDB-GENE-010816-1	.	2.54369	1373.4	0.196186	6.86554	6.62398e-12	2.58801e-10	10.9453	9.59815	9.77517	10.0543	9.86352	10.5238	10.775	10.7451	595	802	637	2421	2147	2201	12.3154	16.2332	13.9095	30.3097	40.7932	39.1875	40.0443	50.6343	46.61	99.1713	129.092	129.304
114427	NM_001311346	vars	valyl-tRNA synthetase	protein_coding	NP_001298275.1	ZDB-GENE-010601-1	.	2.3197	1720.58	0.156502	7.75674	8.71429e-15	4.9795e-13	11.2314	10.018	10.2209	10.3127	10.3397	11.1116	10.9481	10.9303	862	909	956	4008	2244	2330	9.37898	9.66759	10.9773	26.3622	22.404	21.7946	30.4964	30.155	36.7844	86.2555	70.8982	71.9139
114457	NM_131838,XM_005165260	atp1b2b	ATPase, Na+/K+ transporting, beta 2b polypeptide	protein_coding	NP_571913.1;XP_005165317.1	ZDB-GENE-010718-1	.	-3.68962	850.86	0.181959	-10.3511	4.13764e-25	6.37891e-23	8.50542	10.3862	10.1387	9.90813	10.0517	8.84222	9.00153	9.03757	1363	992	1180	451	378	421	24.6773	17.5446	22.5297	4.92713	6.26201	6.5354	80.2401	54.7248	75.496	16.1213	19.8164	21.5643
114461	NM_131840	tnfrsfa	tumor necrosis factor receptor superfamily, member a	protein_coding	NP_571915.2	ZDB-GENE-010802-1	.	2.0536	724.891	0.206346	5.03114	4.87565e-07	7.50158e-06	9.9292	8.89124	9.01556	9.33158	8.99577	9.68976	9.79317	9.67575	374	526	346	1387	1046	970	8.49867	11.6898	8.30429	19.0667	21.8215	18.9587	27.634	36.4627	27.8273	62.3851	69.0551	62.5565
114463	NM_131842	mafbb	v-maf avian musculoaponeurotic fibrosarcoma oncogene homolog Bb	protein_coding	NP_571917.2	ZDB-GENE-010605-4	.	2.69398	93.6089	0.306394	4.66635	3.06604e-06	3.88472e-05	7.09373	5.6618	6.01558	6.1147	6.17645	6.65479	6.9999	6.56933	39	44	50	175	183	111	1.0412	1.17301	1.42984	2.87748	4.57	2.58821	3.38555	3.65884	4.79133	9.41494	14.4619	8.54011
114466	NM_131843,XM_005172247	tnfsf10l	TNF superfamily member 10, like	protein_coding	NP_571918.2;XP_005172304.1	ZDB-GENE-010801-1	.	-2.21812	675.917	0.232013	-4.95378	7.27857e-07	1.07868e-05	8.71493	9.86362	9.73682	9.79577	9.28805	8.91601	8.97847	9.02225	958	957	542	575	418	469	8.10652	7.02247	4.46978	3.24861	3.17865	2.8729	26.3589	21.9044	14.9781	10.6293	10.059	9.47949
114549	NM_131846	ache	acetylcholinesterase	protein_coding	NP_571921.1	ZDB-GENE-010906-1	.	-2.91788	3026.4	0.203329	-7.59815	3.00395e-14	1.60474e-12	10.5937	12.1381	11.8677	12.0224	11.6158	10.8158	11.0354	10.9627	4201	4641	3024	1926	1723	1662	38.4821	41.548	29.2177	10.6538	14.4739	13.0774	125.127	129.596	97.9073	34.8586	45.8031	43.1503
114834	NM_131848,XM_005166704,XM_005166705	tfe3a	transcription factor binding to IGHM enhancer 3a	protein_coding	NP_571923.2;XP_005166761.1;XP_005166762.1	ZDB-GENE-010919-2	.	3.21077	1612.49	0.175186	9.60649	7.50655e-22	8.70873e-20	11.264	9.58067	10.016	9.90985	9.9971	10.8803	11.1191	10.835	738	598	684	3351	2909	2265	13.1173	10.6371	12.6871	38.7	47.9978	35.5608	42.6518	33.179	42.5141	126.624	151.891	117.337
116990	NM_131851	sox32	SRY (sex determining region Y)-box 32	protein_coding	NP_571926.1	ZDB-GENE-011026-1	.	2.85516	15.1602	0.63085	2.39926	0.0164282	0.0546757	4.48978	2.97318	3.82882	3.5598	3.71088	4.09889	3.87284	4.07916	12	2	7	39	15	27	0.435479	0.07129	0.245701	0.842852	0.471253	0.815851	1.41599	0.222365	0.823334	2.75776	1.4913	2.692
140424	NM_131864,XM_009291611,XM_009291614,XM_017359197,XM_021481329	gucy2f	guanylate cyclase 2F, retinal	protein_coding	NP_571939.2;XP_009289886.1;XP_009289889.1;XP_017214686.1;XP_021337004.1	ZDB-GENE-011128-7	.	-4.25393	306.88	0.295395	-7.0712	1.53599e-12	6.6322e-11	6.8714	8.95616	8.74982	8.06814	8.68397	7.28611	7.49457	7.45588	569	244	504	141	130	130	4.70171	1.99065	4.36974	0.673491	0.986747	0.890318	15.2879	6.2092	14.6428	2.20362	3.1226	2.93771
140425	NM_001109695,XM_017356806,XM_021477384	gc2	guanylyl cyclase 2	protein_coding	NP_001103165.1;XP_017212295.1;XP_021333059.1	ZDB-GENE-011128-8	.	-2.01488	201.212	0.285353	-3.54191	0.000397234	0.00261532	7.06258	8.07012	8.0683	7.51419	7.85794	7.23844	7.47072	7.18695	322	152	239	179	166	117	3.60802	1.67861	2.87369	1.13279	1.74599	1.2777	11.7317	5.23591	9.62963	3.70642	5.52525	4.21591
140426	NM_131866,XM_005165261,XM_021475989	gc3	guanylyl cyclase 3	protein_coding	NP_571941.1;XP_005165318.1;XP_021331664.1	ZDB-GENE-011128-9	.	-4.47002	2846.34	0.227255	-9.50599	1.98154e-21	2.20161e-19	10.0238	12.1835	11.9052	11.467	11.9473	10.4477	10.6701	10.4726	4772	2786	4741	1358	1235	998	42.0286	24.6069	44.5334	6.95657	11.6738	8.96007	136.659	76.7534	149.23	22.7614	36.9421	29.5648
140428	NM_131868	gnat1	guanine nucleotide binding protein (G protein), alpha transducing activity polypeptide 1	protein_coding	NP_571943.1	ZDB-GENE-011128-11	.	-10.9879	674.95	0.270654	-12.7759	2.23541e-37	7.78025e-35	6.81987	10.2725	9.9779	9.30702	9.68462	7.68055	7.91985	7.78843	1512	704	1067	135	136	115	35.3401	16.0693	26.3103	1.90408	2.90758	2.30201	114.911	50.1232	88.1646	6.23002	9.20114	7.59577
140429	NM_131869	gnat2	guanine nucleotide binding protein (G protein), alpha transducing activity polypeptide 2	protein_coding	NP_571944.1	ZDB-GENE-011128-10	.	-7.45098	5454.1	0.315309	-9.18917	3.95868e-20	3.97096e-18	10.3345	13.2314	12.9979	12.202	12.827	10.8145	11.2897	10.951	11566	4707	9255	1342	1814	1182	242.785	96.5693	204.933	17.0087	34.9195	21.2992	789.431	301.218	686.723	55.6515	110.504	70.2791
140431	NM_131871	guca1b	guanylate cyclase activator 1B	protein_coding	NP_571946.1	ZDB-GENE-011128-6	.	-4.25902	43.61	0.459102	-4.5535	5.27602e-06	6.30242e-05	4.04739	6.14335	5.84059	5.126	5.70064	4.87734	4.78572	4.88672	90	27	71	27	13	19	3.15984	0.92533	2.61613	0.572343	0.38819	0.569435	10.2745	2.88628	8.76654	1.87267	1.22844	1.87892
140508	rna-trnK	trnK	tRNA-Lys	tRNA	.	ZDB-GENE-011205-31	.	-6.77544	23.0147	0.496163	-5.56332	2.64693e-08	5.39029e-07	2.54996	5.32816	4.6999	4.64165	4.59979	3.98644	3.95952	3.97467	40	34	32	10	5	6	23.5473	19.6531	20.2557	3.52005	2.71591	2.99538	76.5658	61.3017	67.876	11.5174	8.59459	9.88362
140510	rna-trnG	trnG	tRNA-Gly	tRNA	.	ZDB-GENE-011205-32	.	-3.74676	12.9618	0.60074	-3.17216	0.0015131	0.00801047	2.45846	4.35243	3.81969	3.66332	3.81875	3.39041	3.41297	3.45641	21	13	20	7	5	7	12.9632	7.81361	12.7689	2.65164	2.40404	3.53563	42.1509	24.3721	42.7882	8.676	7.60766	11.6662
140511	rna-trnP	trnP	tRNA-Pro	tRNA	.	ZDB-GENE-011205-38	.	-3.41986	9.05208	0.722094	-2.45666	0.0140235	0.0483395	2.0575	3.80132	3.32068	3.11254	3.21732	2.9152	2.96801	3.01543	17	8	12	4	4	6	10.4789	4.38143	7.5733	1.19981	2.02715	3.15585	34.0727	13.6665	25.3778	3.92571	6.415	10.4131
140512	gene-CYTB	CYTB	cytochrome b	protein_coding	NP_059343.1	ZDB-GENE-011205-17	.	-2.02885	13506.9	0.225035	-4.53556	5.74514e-06	6.7782e-05	13.1227	14.1432	14.0038	13.9362	13.8854	13.0477	13.5583	13.3418	17657	15339	14729	9040	11527	9392	681.174	578.37	599.46	210.662	407.836	311.265	2214.89	1804.04	2008.76	689.271	1290.61	1027.06
140513	rna-ZDB-GENE-011205-27	trnC	tRNA-Cys	tRNA	.	ZDB-GENE-011205-27	ZDB-GENE-011205-27	-3.13621	24.2531	0.439819	-3.74931	0.000177319	0.00131224	3.53621	5.20574	4.66707	4.76585	4.74155	4.32175	4.2129	4.2665	30	34	33	21	9	12	17.7793	20.0431	20.723	7.71997	4.78735	5.87242	57.8107	62.5183	69.4418	25.2592	15.1497	19.3767
140514	rna-trnY	trnY	tRNA-Tyr	tRNA	.	ZDB-GENE-011205-28	.	-3.80442	47.3908	0.345616	-5.57752	2.43978e-08	5.00841e-07	4.31485	6.2265	5.72693	5.84152	5.67315	4.96292	5.1469	5.01652	66	73	58	24	25	19	40.8272	44.0145	37.3454	8.96202	14.0616	9.90775	132.753	137.289	125.143	29.3232	44.4984	32.6918
140515	rna-trnR	trnR	tRNA-Arg	tRNA	.	ZDB-GENE-011205-33	.	-3.23055	53.3043	0.315866	-5.35601	8.50787e-08	1.55601e-06	4.65853	6.34612	5.8845	5.9866	5.89816	5.24717	5.35474	5.19988	70	76	68	36	30	22	43.4323	46.1252	44.5744	13.5474	17.0978	11.8223	141.223	143.873	149.367	44.3261	54.1065	39.0091
140516	rna-trnQ	trnQ	tRNA-Gln	tRNA	.	ZDB-GENE-011205-22	.	-3.60229	85.8248	0.310192	-5.96055	2.51391e-09	6.3319e-08	5.22334	7.06923	6.47509	6.85846	6.55611	5.79591	5.94049	5.71872	98	150	104	53	46	31	60.3707	90.7894	67.8643	19.522	26.1242	16.4579	196.299	283.189	227.41	63.8749	82.6709	54.3049
140517	rna-trnH	trnH	tRNA-His	tRNA	.	ZDB-GENE-011205-34	.	-7.74432	13.3971	0.668468	-4.41777	9.97247e-06	0.000110071	1.57801	4.57341	3.90012	3.71507	3.82168	3.33752	3.29014	3.31364	26	16	21	6	2	3	15.8464	9.28395	13.4087	2.17764	0.593049	1.58608	51.5258	28.9584	44.9318	7.12509	1.87673	5.23348
140518	rna-trnT	trnT	tRNA-Thr	tRNA	.	ZDB-GENE-011205-39	.	-3.05192	10.2784	0.658518	-2.44445	0.0145073	0.0496197	2.33572	3.95502	3.48552	3.41322	3.35755	3.16696	3.10594	3.20873	17	13	11	8	3	7	10.0728	7.57876	6.6988	2.74252	1.53226	3.52582	32.7523	23.6396	22.4474	8.97335	4.8489	11.6338
140519	gene-ATP6	ATP6	ATP synthase F0 subunit 6	protein_coding	NP_059336.1	ZDB-GENE-011205-18	.	-2.97669	4411.47	0.221229	-7.11348	1.13151e-12	5.00806e-11	11.1159	12.689	12.5168	12.3839	12.268	11.2349	11.6674	11.4569	6873	5576	4990	2384	2824	2288	442.284	350.686	338.746	92.6652	166.642	126.462	1438.12	1093.86	1135.12	303.195	527.345	417.277
140520	gene-ATP8	ATP8	ATP synthase F0 subunit 8	protein_coding	NP_059335.1	ZDB-GENE-011205-19	.	-4.5969	529.076	0.274569	-8.01497	1.10162e-15	7.06852e-14	7.56763	9.76229	9.50369	9.33473	9.18659	7.8034	8.30619	8.19536	935	730	630	167	243	220	249.204	190.161	177.089	26.9126	59.3494	50.3438	810.306	593.147	593.419	88.0563	187.813	166.115
140521	rna-trnI	trnI	tRNA-Ile	tRNA	.	ZDB-GENE-011205-21	.	-3.69328	68.3275	0.312734	-6.02719	1.66839e-09	4.36001e-08	4.86407	6.74863	6.15591	6.48251	6.24296	5.51006	5.5858	5.45373	80	116	86	43	33	26	47.3853	67.3236	53.7599	15.2257	17.7374	12.7869	154.077	209.995	180.147	49.8174	56.1307	42.1918
140522	rna-trnM	trnM	tRNA-Met	tRNA	.	ZDB-GENE-011205-23	.	-3.40276	75.9672	0.309994	-5.69916	1.20398e-08	2.63146e-07	5.10894	6.87559	6.31409	6.6293	6.40584	5.69911	5.80426	5.57044	88	125	95	52	42	27	55.8002	77.7616	63.5169	19.7194	24.1918	14.673	181.438	242.553	212.842	64.5208	76.5558	48.4154
140524	rna-trnN	trnN	tRNA-Asn	tRNA	.	ZDB-GENE-011205-26	.	-4.67545	18.9787	0.534664	-4.16169	3.15897e-05	0.000300973	2.75904	4.96292	4.2877	4.33652	4.41926	3.77123	3.80188	3.9432	25	26	31	7	5	11	14.5798	15.125	19.4747	2.19281	2.75971	5.29321	47.4072	47.1775	65.2589	7.17475	8.73322	17.4656
140525	rna-trnF	trnF	tRNA-Phe	tRNA	.	ZDB-GENE-011205-2	.	-2.09194	57.8308	0.298612	-3.56597	0.000362514	0.00242082	5.21941	6.29288	5.93497	6.1122	5.96724	5.63071	5.53495	5.54651	64	78	64	62	34	37	40.59	48.1596	42.6467	23.8556	19.6848	20.1483	131.981	150.219	142.907	78.0541	62.2932	66.4817
140526	rna-trnD	trnD	tRNA-Asp	tRNA	.	ZDB-GENE-011205-30	.	-7.33701	44.7152	0.38088	-7.54882	4.39222e-14	2.29826e-12	3.44829	6.2949	5.67824	5.5958	5.71312	4.61531	4.76705	4.72458	73	61	73	12	13	12	46.2875	37.5597	48.9904	4.24304	7.18338	6.07759	150.507	117.156	164.165	13.883	22.7321	20.0537
140527	rna-trnE	trnE	tRNA-Glu	tRNA	.	ZDB-GENE-011205-37	.	-5.02008	10.8982	0.673483	-3.45622	0.0005478	0.00342129	1.82733	4.18963	3.49726	3.56597	3.46655	3.1747	3.13434	3.12669	16	18	14	7	3	3	10.138	10.9086	9.01577	2.37335	1.61047	1.6442	32.9645	34.026	30.2115	7.76546	5.09639	5.42525
140529	rna-trnS2	trnS2	tRNA-Ser	tRNA	.	ZDB-GENE-011205-35	.	-6.98602	6.72911	0.895918	-3.13027	0.00174643	NA	0.724153	3.56148	2.73305	2.80406	2.79987	2.50121	2.47824	2.50582	9	11	11	3	1	2	5.35411	6.38576	6.78901	1.11715	0.120738	0.95999	17.4093	19.9184	22.7497	3.65524	0.382078	3.1676
140530	rna-trnL1	trnL1	tRNA-Leu	tRNA	.	ZDB-GENE-011205-6	.	-2.9342	115.472	0.241896	-6.41996	1.36307e-10	4.29508e-09	5.87517	7.42836	7.04412	7.21201	6.97132	6.33681	6.37076	6.30831	150	173	130	87	61	58	85.7078	96.5243	78.3902	29.9253	31.853	28.2811	278.685	301.077	262.682	97.9135	100.8	93.3168
140531	gene-ND1	ND1	NADH dehydrogenase subunit 1	protein_coding	NP_059331.1	ZDB-GENE-011205-7	.	-2.90204	8465.52	0.220822	-6.96065	3.38701e-12	1.40693e-10	12.0834	13.6201	13.3635	13.4221	13.1996	12.1679	12.6077	12.4512	11882	11842	9448	4521	5404	4699	536.443	522.532	449.966	123.28	223.75	182.239	1744.28	1629.87	1507.82	403.363	708.065	601.32
140532	gene-ND2	ND2	NADH dehydrogenase subunit 2	protein_coding	NP_059332.1	ZDB-GENE-011205-8	.	-2.64564	4857.55	0.222539	-6.30728	2.83985e-10	8.47196e-09	11.3802	12.7833	12.6011	12.5308	12.4098	11.4472	11.9098	11.6572	7049	6113	5438	2845	3471	2677	296.35	251.19	241.185	72.2323	133.814	96.6733	963.603	783.507	808.201	236.34	423.46	318.985
140533	gene-ND3	ND3	NADH dehydrogenase subunit 3	protein_coding	NP_059338.1	ZDB-GENE-011205-9	.	-3.60188	1799.43	0.194485	-9.50586	1.98395e-21	2.20161e-19	9.61253	11.4595	11.1601	11.0953	11.1057	9.84242	10.1856	10.0845	2681	2340	2404	865	929	861	336.135	286.736	318.009	65.4905	106.831	92.7414	1092.97	894.382	1065.64	214.281	338.071	306.011
140534	gene-ND4	ND4	NADH dehydrogenase subunit 4	protein_coding	NP_059340.1	ZDB-GENE-011205-10	.	-2.33408	12246.7	0.228526	-5.35106	8.74417e-08	1.59668e-06	12.8429	14.0656	13.8902	13.899	13.6868	12.8194	13.2996	13.1385	16714	15792	12698	7439	9230	8022	532.759	491.978	426.978	143.226	269.805	219.66	1732.3	1534.57	1430.79	468.627	853.809	724.794
140535	gene-ND5	ND5	NADH dehydrogenase subunit 5	protein_coding	NP_059341.1	ZDB-GENE-011205-12	.	-2.36535	7878.34	0.222368	-5.58559	2.32902e-08	4.81547e-07	12.1931	13.4349	13.2738	13.1945	13.1146	12.1851	12.6646	12.4777	10997	9439	8781	4796	5949	5004	265.83	222.997	223.906	70.0202	131.874	103.91	864.366	695.569	750.3	229.102	417.321	342.865
140536	gene-ND6	ND6	NADH dehydrogenase subunit 6	protein_coding	NP_059342.1	ZDB-GENE-011205-13	.	-2.32247	2479.71	0.243003	-5.00264	5.65492e-07	8.60259e-06	10.5443	11.7591	11.5758	11.5884	11.3864	10.481	11.0072	10.8606	3360	3188	2589	1424	1894	1674	284.956	264.238	231.618	72.9558	147.298	121.97	926.553	824.207	776.144	238.707	466.13	402.454
140537	rna-trnL2	trnL2	tRNA-Leu	tRNA	.	ZDB-GENE-011205-36	.	-6.73279	4.35068	1.08956	-2.52506	0.0115679	NA	0.147407	2.92482	2.1354	2.14771	2.11428	1.94283	1.93869	1.93548	7	7	6	2	1	1	4.11362	4.00298	3.47043	0.400333	0.39972	0.420585	13.3757	12.486	11.6293	1.30986	1.26493	1.38777
140538	gene-ND4L	ND4L	NADH dehydrogenase subunit 4L	protein_coding	NP_059339.1	ZDB-GENE-011205-11	.	-3.43063	834.153	0.194726	-9.1332	6.65038e-20	6.58474e-18	8.55928	10.3344	10.049	10.0147	9.93714	8.81276	9.13351	8.98988	1241	1119	1044	434	454	396	183.804	162.017	163.115	38.8572	61.6432	50.3245	597.651	505.362	546.592	127.138	195.072	166.052
140541	gene-COX3	COX3	cytochrome c oxidase subunit III	protein_coding	NP_059337.1	ZDB-GENE-011205-16	.	-2.34369	31988.5	0.229656	-5.35054	8.76937e-08	1.59874e-06	14.2239	15.4526	15.2169	15.2705	15.1583	14.1772	14.6968	14.5196	40954	40633	36509	18748	24478	20871	2293.62	2224.07	2156.98	634.244	1257.24	1004.15	7457.86	6937.3	7227.94	2075.21	3978.59	3313.33
140622	NM_001082796	atic	5-aminoimidazole-4-carboxamide ribonucleotide formyltransferase/IMP cyclohydrolase	protein_coding	NP_001076265.2	ZDB-GENE-011212-4	.	2.02461	317.933	0.174755	5.82327	5.77085e-09	1.35544e-07	8.7341	7.71457	8.0148	7.96486	7.91667	8.45009	8.57247	8.54427	205	179	170	575	446	457	4.59291	3.92991	4.02065	7.80729	9.17958	8.80812	14.9342	12.2581	13.473	25.545	29.0491	29.0634
140633	NM_182857,XM_009298837,XM_021478636,XM_021478637	per2	period circadian clock 2	protein_coding	NP_878277.2;XP_009297112.1;XP_021334311.1;XP_021334312.1	ZDB-GENE-011220-2	.	-2.92482	1935.29	0.217865	-7.10691	1.18673e-12	5.24237e-11	9.9456	11.4941	10.9501	11.4721	11.1086	10.3075	10.3167	10.2616	1994	3296	2264	1478	1002	987	16.1664	26.3445	19.5284	7.26804	7.46707	6.87929	52.5663	82.1735	65.439	23.7806	23.6298	22.699
140634	NM_131879	cyp1a	cytochrome P450, family 1, subfamily A	protein_coding	NP_571954.1	ZDB-GENE-011219-1	.	-3.84181	49.0039	0.397611	-4.88364	1.04145e-06	1.48869e-05	4.35825	6.27609	5.59972	5.96065	5.77652	4.87014	5.12713	5.1842	53	84	66	17	23	28	0.888226	1.3818	1.17238	0.172829	0.350981	0.405864	2.88813	4.31009	3.9286	0.565487	1.11069	1.3392
140746	NM_131881	irx7	iroquois homeobox 7	protein_coding	NP_571956.1	ZDB-GENE-020103-1	.	2.33633	99.992	0.328339	3.72859	0.000192556	0.00140821	7.12985	5.90518	6.42035	6.00958	6.31695	6.90169	6.59558	6.97353	71	31	57	224	100	175	2.63274	1.09412	2.2289	5.01795	3.40236	5.58435	8.56055	3.41277	7.46896	16.4184	10.7669	18.4262
140747	NM_131882	cxcr4a	chemokine (C-X-C motif) receptor 4a	protein_coding	NP_571957.2	ZDB-GENE-020102-1	.	6.96622	92.6366	0.361924	7.73747	1.01413e-14	5.70969e-13	7.3392	4.54514	5.47152	5.79913	5.4712	6.89759	6.86916	6.5493	15	32	14	272	178	127	0.417215	0.891994	0.400535	4.73856	4.70545	3.14038	1.3566	2.7823	1.34218	15.5043	14.8906	10.362
140811	NM_001309267,NM_131883,XM_017358676	psap	prosaposin	protein_coding	NP_001296196.1;NP_571958.2;XP_017214165.1	ZDB-GENE-020108-1	.	2.02366	2919.04	0.140588	7.23368	4.70078e-13	2.18586e-11	11.932	10.915	11.1224	11.1859	11.1079	11.7358	11.8118	11.6578	1725	1748	1610	5753	4197	3744	31.7394	31.3482	31.1066	63.1161	71.2528	58.8629	103.203	97.7809	104.237	206.512	225.482	194.225
140814	NM_131884	cebpb	CCAAT/enhancer binding protein (C/EBP), beta	protein_coding	NP_571959.2	ZDB-GENE-020111-3	.	8.53975	1577.34	0.193667	15.9769	1.85249e-57	2.83691e-54	11.4635	8.36942	9.12929	9.15712	9.28775	10.9176	11.1192	10.7719	272	266	332	4043	3336	2467	7.87556	7.52692	10.1316	70.8204	88.7069	61.4547	25.608	23.4779	33.9506	231.72	280.716	202.777
142987	NM_152977,NM_178163	dmbx1a	diencephalon/mesencephalon homeobox 1a	protein_coding	NP_694509.1;NP_835457.2	ZDB-GENE-020117-1	.	2.57258	330.173	0.284224	4.79626	1.61652e-06	2.20925e-05	8.89373	7.52908	8.10921	7.49905	7.88732	8.587	8.58107	8.66095	236	89	166	682	455	528	7.3647	2.66908	5.51906	12.9359	13.1382	14.248	23.9469	8.32536	18.4941	42.3256	41.5762	47.013
171477	NM_199528	rbp5	retinol binding protein 1a, cellular	protein_coding	NP_955822.2	ZDB-GENE-020320-1	.	-2.36215	228.414	0.186799	-6.6387	3.16462e-11	1.10143e-09	7.08261	8.32771	8.05088	8.08854	8.05721	7.4766	7.33893	7.39698	288	282	276	222	121	140	10.0288	9.59618	10.1338	4.66242	3.83909	4.1616	32.6094	29.9323	33.958	15.2552	12.1489	13.7317
171480	NM_182859	crabp2a	cellular retinoic acid binding protein 2, a	protein_coding	NP_878279.1	ZDB-GENE-020320-4	.	-2.60953	229.135	0.327482	-4.22554	2.38365e-05	0.0002351	6.9905	8.37117	8.00052	8.41529	7.61981	7.14477	7.37033	7.43576	281	422	166	143	134	156	4.92748	7.22032	3.06914	1.5054	2.14406	2.35025	16.0221	22.5215	10.2846	4.92557	6.78495	7.75494
192124	NM_152965,XM_021477569	glra3	glycine receptor, alpha 3	protein_coding	NP_694497.1;XP_021333244.1	ZDB-GENE-020402-1	.	-2.00554	695.95	0.229455	-4.37555	1.21128e-05	0.000130569	8.85581	9.85891	9.83969	9.32844	9.72324	9.01121	9.0812	9.13597	1045	542	873	627	460	523	13.2939	6.67357	11.9636	4.8717	5.57236	6.17833	43.2261	20.8161	40.0896	15.9399	17.6339	20.3861
192294	NM_153666	tbx6	T-box 6	protein_coding	NP_705952.2	ZDB-GENE-020416-5	.	2.6421	93.9703	0.272392	5.14584	2.66322e-07	4.4171e-06	7.0896	5.69318	6.09256	6.23374	6.05826	6.90126	6.7283	6.66218	44	53	39	237	128	124	0.631247	0.737663	0.593543	2.05859	1.69458	1.53601	2.05254	2.30091	1.98894	6.73558	5.36257	5.06823
192326	NM_201455	cct2	chaperonin containing TCP1, subunit 2 (beta)	protein_coding	NP_958863.1	ZDB-GENE-020419-6	.	2.06687	2373.05	0.167163	6.26601	3.70425e-10	1.07846e-08	11.6431	10.596	10.7503	10.9365	10.7835	11.5548	11.4025	11.3551	1281	1516	1271	5347	3029	3042	56.7093	65.6037	59.3344	143.025	122.994	115.725	184.394	204.63	198.827	467.969	389.219	381.849
245700	NM_001123229	insrb	insulin receptor b	protein_coding	NP_001116701.1	ZDB-GENE-020503-4	.	2.0634	5165.7	0.123622	8.45337	2.83009e-17	2.167e-15	12.7646	11.7197	11.9146	11.9867	11.9471	12.5835	12.5669	12.5481	2944	3016	2916	10458	6885	7142	32.0193	32.0618	33.4509	68.7146	68.6753	66.7325	104.113	100.007	112.092	224.83	217.325	220.192
246092	NM_199271	cpa5	carboxypeptidase A5	protein_coding	NP_954965.1	ZDB-GENE-020514-1	.	-3.08476	119.613	0.378387	-4.29497	1.74719e-05	0.000178933	5.8778	7.49525	7.34297	6.65618	7.21714	6.17852	6.58043	6.1617	217	84	178	67	87	45	7.08007	2.66699	6.09853	1.31817	2.5847	1.24317	23.0213	8.31883	20.4359	4.31296	8.17938	4.102
246227	NM_153657	ptgs2a	prostaglandin-endoperoxide synthase 2a	protein_coding	NP_705943.1	ZDB-GENE-020530-2	.	4.92033	548.298	0.26192	8.77657	1.68538e-18	1.44857e-16	9.83196	7.53279	8.01792	7.99192	8.33814	9.24879	9.656	9.26568	142	127	218	1129	1174	818	2.91533	2.55484	4.74148	14.0498	22.1964	14.4787	9.47942	7.96902	15.8885	45.9699	70.2412	47.7741
252851	NM_212614	mycn	MYCN proto-oncogene, bHLH transcription factor	protein_coding	NP_997779.2	ZDB-GENE-020711-1	.	2.47758	992.439	0.159572	8.20274	2.34966e-16	1.59686e-14	10.4658	9.15657	9.54442	9.39789	9.43429	10.2435	10.2724	10.1238	581	448	478	2151	1490	1337	9.35304	7.04226	8.10576	20.912	21.9985	18.4896	30.4121	21.9661	27.1621	68.4226	69.6151	61.0085
259260	NM_152980	mst1	macrophage stimulating 1	protein_coding	NP_694512.1	ZDB-GENE-020806-3	.	2.23124	359.133	0.241284	4.7987	1.597e-06	2.18795e-05	8.95458	7.7953	8.02261	7.94947	8.22614	8.56431	8.93976	8.58997	189	159	237	614	635	450	3.4183	2.8074	4.52424	6.71247	10.5402	6.99234	11.1148	8.75681	15.1606	21.9628	33.3547	23.0721
259306	NM_152954	cyp2ad2	cytochrome P450, family 2, subfamily AD, polypeptide 2	protein_coding	NP_694486.1	ZDB-GENE-020812-2	.	-2.66639	46.108	0.347635	-4.07004	4.70042e-05	0.000422167	4.65938	6.06492	5.64293	5.79239	5.61603	5.10428	5.29157	5.0736	57	67	52	33	33	21	1.32183	1.50629	1.26703	0.456383	0.696499	0.40498	4.29803	4.69841	4.24575	1.49326	2.2041	1.33628
266676	NM_200462	dnah9	dynein, axonemal, heavy chain 9	protein_coding	NP_956756.1	ZDB-GENE-020925-1	.	2.05496	160.83	0.227549	4.56653	4.95854e-06	5.96037e-05	7.75697	6.71901	6.96951	7.13482	6.87406	7.53307	7.45609	7.58625	92	110	75	321	196	244	2.05782	2.40618	1.76118	4.34228	4.02712	4.69382	6.69114	7.50533	5.90164	14.2077	12.744	15.4878
266987	NM_001014345	cbsb	cystathionine-beta-synthase b	protein_coding	NP_001014367.2	ZDB-GENE-021030-3	.	2.04374	1607.31	0.154446	6.67682	2.4418e-11	8.73686e-10	11.0758	10.0447	10.2013	10.3851	10.2279	10.8639	10.9181	10.8456	877	1036	863	3138	2236	2184	13.6005	15.7147	14.1161	29.4215	31.8289	29.1216	44.223	49.0172	47.3024	96.2652	100.724	96.0902
286777	NM_173268	ddx54	DEAD (Asp-Glu-Ala-Asp) box polypeptide 54	protein_coding	NP_775375.1	ZDB-GENE-021220-2	.	2.06448	325.176	0.255645	4.09074	4.30002e-05	0.000392123	8.77436	7.7312	7.73906	8.19178	7.95336	8.71711	8.44767	8.46882	137	241	178	780	383	416	2.11611	3.64634	2.90482	7.31686	5.44675	5.55368	6.88067	11.3736	9.73394	23.9403	17.2365	18.325
317638	NM_173283	igfbp1a	insulin-like growth factor binding protein 1a	protein_coding	NP_775390.2	ZDB-GENE-021231-1	.	4.60712	790.545	0.201704	10.9262	8.6357e-28	1.54977e-25	10.3433	8.13939	8.6857	8.7976	8.59958	9.91341	10.1157	9.77375	253	278	211	1853	1543	1131	6.60198	7.09222	5.79748	29.2113	36.9405	25.355	21.4668	22.122	19.4271	95.5777	116.9	83.662
321046	NM_131242	c3a.1	complement component c3a, duplicate 1	protein_coding	NP_571317.1	ZDB-GENE-990415-35	.	6.69241	2333.29	0.327436	8.37578	5.48615e-17	4.03918e-15	11.9873	9.24433	10.077	9.63329	9.96579	10.9986	11.9027	11.4021	703	334	571	3507	6057	3849	6.10065	2.83035	5.22356	18.4005	48.2442	28.7207	19.8367	8.82839	17.5039	60.2054	152.671	94.7673
321061	NM_198978,XM_005161791	pdcd4b	programmed cell death 4b	protein_coding	NP_945329.1;XP_005161848.1	ZDB-GENE-030131-9847	.	2.52699	2054.85	0.165183	8.09659	5.65225e-16	3.73097e-14	11.5239	10.1861	10.529	10.373	10.5566	11.1614	11.3003	11.3436	1119	853	1102	3843	3006	3338	22.6683	16.876	23.5345	47.0191	55.8342	58.0942	73.7076	52.6394	78.8632	153.844	176.689	191.689
321113	NM_199534	zgc:65851	zgc:65851	protein_coding	NP_955828.1	ZDB-GENE-030131-9669	.	-2.29691	622.512	0.252308	-4.75489	1.98555e-06	2.63908e-05	8.56013	9.76085	9.32116	9.82043	9.31857	8.87974	8.68953	8.90652	634	1038	601	595	308	437	12.8816	20.6066	12.8661	7.29909	5.73763	7.61914	41.8856	64.2758	43.1138	23.8822	18.1569	25.1403
321166	NM_001030062,XM_005160629	apobb.1	apolipoprotein Bb, tandem duplicate 1	protein_coding	NP_001025233.1;XP_005160686.1	ZDB-GENE-030131-9732	.	2.48163	25325.2	0.248317	5.28069	1.28701e-07	2.2637e-06	15.1398	13.8285	14.151	13.8735	14.2595	14.5776	15.1117	14.9012	14023	9141	15249	37734	45484	38446	53.2046	33.8969	61.0327	86.4829	158.272	125.311	172.999	105.731	204.518	282.967	500.857	413.479
321177	XM_003199845	si:ch211-153b23.5	si:ch211-153b23.5	protein_coding	XP_003199893.1	ZDB-GENE-030131-9744	.	8.98829	163.318	0.303876	10.4254	1.89762e-25	3.00622e-23	8.19875	5.03672	5.99843	6.16786	6.22945	7.86346	7.56298	7.40407	21	30	35	559	271	239	0.913529	1.27705	1.64329	15.1821	11.1473	9.2053	2.9704	3.98335	5.50661	49.675	35.2759	30.374
321193	NM_199537	paics	phosphoribosylaminoimidazole carboxylase, phosphoribosylaminoimidazole succinocarboxamide synthetase	protein_coding	NP_955831.1	ZDB-GENE-030131-9762	.	2.26126	909.381	0.195284	6.02774	1.66265e-09	4.34996e-08	10.3006	9.12298	9.35644	9.25036	9.54511	9.99	10.1924	10.015	486	394	589	1699	1429	1242	13.7496	10.8783	17.5749	29.0436	37.0816	30.1925	44.7077	33.9315	58.8926	95.029	117.346	99.6236
321330	NM_201178,XM_005168961	rhpn2	rhophilin, Rho GTPase binding protein 2	protein_coding	NP_957472.1;XP_005169018.1	ZDB-GENE-030131-9927	.	2.06247	573.907	0.235876	4.42763	9.52742e-06	0.000105676	9.5941	8.5505	8.51346	8.97404	8.82101	9.40739	9.46115	9.26141	234	407	340	1175	838	706	4.56314	7.78165	7.01217	13.8932	15.0458	11.9047	14.8374	24.2724	23.4975	45.4577	47.613	39.2811
321383	NM_201466,XM_005171152	pfn2l	profilin 2 like	protein_coding	NP_958874.2;XP_005171209.1	ZDB-GENE-030131-34	.	-2.12442	2627.31	0.223344	-4.86724	1.13169e-06	1.60767e-05	10.7163	11.8026	11.7557	11.4657	11.5219	10.6929	11.0835	11.0292	3914	2658	2877	1773	1964	1946	64.3456	42.7892	49.8599	18.0051	30.0294	28.119	209.224	133.467	167.079	58.9116	95.029	92.7819
321442	NM_198800	nppa	natriuretic peptide A	protein_coding	NP_942095.2	ZDB-GENE-030131-95	.	2.00856	33.2086	0.473704	2.12403	0.0336673	0.0952077	5.47083	4.4639	4.84653	5.0365	4.55152	5.10933	5.1249	5.25141	21	30	7	59	41	54	0.548807	0.778862	0.181716	0.954559	1.01057	1.24165	1.78448	2.42942	0.608924	3.12326	3.19798	4.09698
321453	NM_212584,XM_005165268,XM_021476007	ctsla	cathepsin La	protein_coding	NP_997749.1;XP_005165325.1;XP_021331682.1	ZDB-GENE-030131-106	.	3.856	4232.98	0.191127	10.1875	2.25484e-24	3.27822e-22	12.7148	10.7676	11.1763	11.27	11.2202	12.1483	12.5685	12.3294	1493	1586	1507	7856	8258	6794	44.8418	46.6298	48.1442	143.043	230.586	175.662	145.806	145.447	161.329	468.026	729.699	579.617
321461	NM_199543	cd63	CD63 molecule	protein_coding	NP_955837.1	ZDB-GENE-030131-180	.	2.09472	445.462	0.213445	4.9978	5.79877e-07	8.80976e-06	9.23679	8.16791	8.43421	8.40202	8.42037	8.78236	9.2065	9.02029	268	240	250	674	739	634	10.0672	8.83583	9.93634	15.3385	25.5092	20.4979	32.7344	27.5606	33.2963	50.1867	80.7249	67.6352
321618	NM_199552	h1f0	H1 histone family, member 0	protein_coding	NP_955846.1	ZDB-GENE-030131-337	.	2.11661	6418.46	0.249938	4.32809	1.50408e-05	0.000157476	13.0898	12.0079	12.4069	12.042	12.2174	12.5627	13.127	12.8561	4652	2750	3504	9037	11347	8953	153.83	88.8872	122.25	180.531	344.152	254.356	500.19	277.256	409.655	590.685	1089.08	839.277
321621	NM_199554	gldc	glycine dehydrogenase (decarboxylating)	protein_coding	NP_955848.1	ZDB-GENE-030131-340	.	4.98192	1851.74	0.199618	11.6057	3.85544e-31	9.32246e-29	11.5908	9.27403	9.744	9.93682	9.83912	11.0294	11.3884	11.0868	489	603	534	3870	3792	2925	7.49038	9.0302	8.63942	35.8476	53.3322	38.5392	24.3555	28.1669	28.9503	117.291	168.772	127.165
321806	NM_213100	irx3b	iroquois homeobox 3b	protein_coding	NP_998265.1	ZDB-GENE-030131-525	.	2.12631	169.008	0.236037	4.61093	4.00863e-06	4.90582e-05	7.84508	6.75597	7.11365	7.14692	6.85747	7.59887	7.67853	7.53155	109	107	69	336	249	220	3.91919	3.78527	2.60916	7.32597	8.26428	6.83876	12.7435	11.807	8.7432	23.9701	26.1526	22.5653
321928	NM_199577	phgdh	phosphoglycerate dehydrogenase	protein_coding	NP_955871.2	ZDB-GENE-030131-647	.	2.31643	972.85	0.202362	5.9888	2.11389e-09	5.4134e-08	10.4082	9.19668	9.33734	9.68179	9.35972	10.1594	10.1862	10.1688	447	654	438	1976	1366	1419	8.26776	11.8396	8.54413	22.1142	23.2047	22.5761	26.8832	36.9298	28.631	72.3564	73.4322	74.4925
321932	NM_001045281	hfe2	hemochromatosis type 2	protein_coding	NP_001038746.1	ZDB-GENE-030131-651	.	-2.1829	193.337	0.399247	-2.82093	0.00478843	0.020746	6.92432	8.05102	7.46658	8.29217	7.21175	7.16107	7.17385	7.16699	167	413	112	178	121	127	4.2836	10.3606	3.01799	2.7587	2.83911	2.78293	13.9284	32.3167	10.1132	9.02628	8.98447	9.18259
322228	NM_001012480	bhmt	betaine-homocysteine methyltransferase	protein_coding	NP_001012498.1	ZDB-GENE-030131-947	.	3.37227	9232.71	0.174308	10.0611	8.21024e-24	1.13613e-21	13.7979	12.0442	12.4479	12.5694	12.3068	13.4748	13.5654	13.3903	3858	4228	3030	20899	15438	13549	115.135	123.301	95.3724	376.758	422.542	347.362	374.37	384.599	319.589	1232.73	1337.15	1146.16
322327	NM_001130586	apoa2	apolipoprotein A-II	protein_coding	NP_001124058.1	ZDB-GENE-030131-1046	.	2.28882	1496.85	0.281278	4.24707	2.1658e-05	0.000216213	11.0249	9.82968	10.2316	9.8475	10.1312	10.3662	11.047	10.8197	1002	567	840	1907	2752	2277	66.4276	36.6936	58.7226	76.331	167.287	129.65	215.994	114.454	196.777	249.75	529.385	427.796
322331	XM_005173023,XM_021480878	ephx5	epoxide hydrolase 5, transcript variant X1	protein_coding	XP_005173080.4;XP_021336553.1	ZDB-GENE-030131-1050	.	-2.15391	53.5003	0.395465	-2.79914	0.00512395	0.0218615	5.07756	6.19443	5.77481	6.13293	5.66223	5.51494	5.22012	5.53178	57	90	45	59	20	43	1.28431	1.94893	1.05046	0.790655	0.411476	0.821315	4.17603	6.07907	3.52007	2.58697	1.30213	2.71002
322341	NM_001328513,XM_009304859,XR_002459470,XR_662665	cyp27a1.4	cytochrome P450, family 27, subfamily A, polypeptide 1, gene 4	protein_coding	NP_001315442.1;XP_009303134.1	ZDB-GENE-030131-1060	.	-2.69691	108.304	0.273116	-5.24065	1.60008e-07	2.75528e-06	5.88087	7.30085	6.89923	6.87582	7.12153	6.13316	6.3834	6.35681	131	119	165	65	67	68	3.37445	3.02223	4.30101	0.941235	1.46963	1.4024	10.9722	9.4269	14.4125	3.07966	4.65069	4.6274
322358	NM_194368,XM_009296811,XM_021469746,XM_021469747,XM_021469748,XM_021469749	hnf4a	hepatocyte nuclear factor 4, alpha	protein_coding	NP_919349.1;XP_009295086.1;XP_021325421.1;XP_021325422.1;XP_021325423.1;XP_021325424.1	ZDB-GENE-030131-1077	.	-2.11423	94.9089	0.291773	-3.70196	0.000213942	0.00153146	5.9317	7.00873	6.80703	6.63434	6.77637	6.16135	6.08259	6.44172	128	95	117	79	45	88	3.80171	2.83337	3.67518	1.07835	0.91305	1.84943	12.3615	8.83782	12.3154	3.5283	2.88938	6.1024
322451	NM_212618	ctrb1	chymotrypsinogen B1	protein_coding	NP_997783.1	ZDB-GENE-030131-1171	.	-4.18099	102.452	0.379159	-5.44322	5.23263e-08	1.00753e-06	5.31701	7.36667	7.20378	6.47917	6.88568	5.73716	6.0841	6.00698	217	81	141	37	50	46	11.2558	4.10074	7.71494	1.13618	2.35496	2.01208	36.599	12.791	25.8525	3.71751	7.45235	6.6391
322453	NM_199605	prss59.1	protease, serine, 59, tandem duplicate 1	protein_coding	NP_955899.2	ZDB-GENE-030131-1173	.	-3.09688	125.218	0.269386	-6.05383	1.41441e-09	3.75611e-08	5.93843	7.56308	7.38705	6.96228	7.21017	6.33959	6.4581	6.44093	216	119	166	80	65	67	11.1855	5.97374	9.01728	2.49312	3.08553	2.97336	36.3706	18.6332	30.2165	8.15734	9.76427	9.81095
322462	NM_214686	sult6b1	sulfotransferase family, cytosolic, 6b, member 1	protein_coding	NP_999851.1	ZDB-GENE-050417-228	.	2.03764	212.974	0.241454	4.25298	2.10945e-05	0.000211323	8.15756	7.13345	7.24783	7.60046	7.29381	8.02552	7.89633	7.8734	103	160	105	469	270	278	4.02335	6.14599	4.32895	11.1341	9.71499	9.38297	13.0822	19.1705	14.5061	36.4302	30.7434	30.9602
322468	NM_001316326,XM_009307025	chs1	chitin synthase 1	protein_coding	NP_001303255.1;XP_009305300.1	ZDB-GENE-030131-1188	.	-2.93931	159.981	0.232433	-6.69216	2.19902e-11	7.90511e-10	6.34683	7.89826	7.64321	7.43569	7.60384	6.74526	6.90232	6.68279	239	174	217	114	97	72	2.25811	1.60429	2.17107	0.650225	0.841372	0.58345	7.34242	5.00409	7.27515	2.1275	2.66255	1.92516
322481	NM_199607	cel.1	carboxyl ester lipase, tandem duplicate 1	protein_coding	NP_955901.1	ZDB-GENE-030131-1201	.	-2.58444	42.0522	0.5924	-2.31238	0.020757	0.0656761	4.56035	5.91911	5.867	4.86268	5.45268	4.82735	5.23155	4.76517	96	15	51	25	40	14	2.35232	0.349608	1.32191	0.370807	0.903794	0.284855	7.64873	1.09049	4.42967	1.21326	2.86009	0.939913
322482	NM_001001946	adh8a	alcohol dehydrogenase 8a	protein_coding	NP_001001946.3	ZDB-GENE-030529-3	.	3.03824	19.8934	0.504592	3.17729	0.00148659	0.00788832	4.90426	3.29888	4.103	4.09707	3.95459	4.43575	4.38074	4.51157	11	10	5	43	26	36	0.306855	0.281631	0.14477	0.77259	0.694109	0.896591	0.997762	0.878461	0.485118	2.52787	2.19653	2.95841
322485	NM_198063	agt	angiotensinogen	protein_coding	NP_932329.1	ZDB-GENE-030131-1205	.	2.3175	155.396	0.347177	3.49266	0.000478227	0.00305658	7.7633	6.54733	6.75928	6.74023	7.04293	7.09539	7.83207	7.35906	73	66	107	196	327	197	1.92813	1.70543	2.9857	3.12804	7.93095	4.46313	6.26945	5.31955	10.0049	10.2347	25.0978	14.7266
322493	NM_001042721	slc2a2	solute carrier family 2 (facilitated glucose transporter), member 2	protein_coding	NP_001036186.1	ZDB-GENE-030131-1213	.	-2.05297	74.1749	0.335549	-3.09257	0.00198431	0.0100467	5.61223	6.63567	6.34309	6.25915	6.47882	5.64966	5.96794	6.07246	88	73	101	43	53	67	1.42629	1.15226	1.71905	0.41929	0.778511	0.92943	4.63767	3.59412	5.76046	1.37189	2.46363	3.06677
322508	NM_199276	h1fx	H1 histone family, member X	protein_coding	NP_954970.1	ZDB-GENE-030131-1228	.	3.74838	1358.48	0.277086	6.8797	5.99781e-12	2.38366e-10	11.0668	9.15974	9.79953	9.32631	9.62775	10.3867	10.949	10.7135	678	326	513	2220	2739	2261	22.7212	10.6594	18.1348	44.9805	84.2645	65.165	73.8796	33.2486	60.7691	147.173	266.658	215.02
322509	NM_212620	acta2	actin, alpha 2, smooth muscle, aorta	protein_coding	NP_997785.2	ZDB-GENE-030131-1229	.	-2.28529	452.748	0.233977	-5.09613	3.46668e-07	5.55846e-06	8.10889	9.29789	8.97376	9.20926	8.95761	8.19671	8.58719	8.33421	524	641	489	313	355	269	14.4923	17.3295	14.2654	5.21831	8.99861	6.38872	47.1228	54.0541	47.8029	17.074	28.4764	21.0804
322533	NM_001089325	anpepb	alanyl (membrane) aminopeptidase b	protein_coding	NP_001082794.1	ZDB-GENE-030131-1253	.	-3.22639	323.627	0.231114	-7.31208	2.63044e-13	1.27208e-11	7.25681	8.94929	8.50559	8.42294	8.85049	7.75309	7.64638	7.66982	400	340	561	248	141	155	5.38653	4.47232	7.96673	2.00998	1.74064	1.79329	17.5147	13.95	26.6962	6.57654	5.50833	5.91717
322617	NM_199612	cx32.3	connexin 32.3	protein_coding	NP_955906.1	ZDB-GENE-030131-1337	.	-2.85678	12.7813	0.688956	-2.19809	0.0279425	0.0826614	2.7506	4.23517	3.46444	3.85064	3.7661	3.33467	3.52305	3.43646	7	23	19	5	10	7	0.225883	0.715355	0.64219	0.092865	0.290327	0.182325	0.734475	2.23133	2.15195	0.30385	0.918749	0.601604
322977	NM_213439	mid1ip1l	MID1 interacting protein 1, like	protein_coding	NP_998604.1	ZDB-GENE-030131-1697	.	-2.9822	212.009	0.189756	-8.30739	9.78302e-17	6.93598e-15	6.73711	8.30989	7.99887	8.02544	7.93054	7.11152	7.18684	7.18895	294	284	258	146	109	116	10.4651	9.87194	9.7054	3.12546	3.56574	3.54154	34.0281	30.7924	32.5224	10.2263	11.2839	11.6857
322997	NM_001083812,XM_021468754	ell2	elongation factor, RNA polymerase II, 2	protein_coding	NP_001077281.2;XP_021324429.1	ZDB-GENE-030131-1717	.	-2.62459	505.117	0.200976	-6.92664	4.30948e-12	1.74283e-10	8.12514	9.5138	9.37668	9.17223	9.1524	8.30755	8.4847	8.56355	778	579	575	334	286	337	8.06411	5.85309	6.27976	2.0864	2.71408	2.99434	26.221	18.2569	21.0432	6.82656	8.58881	9.88017
323285	NM_178131	scinla	scinderin like a	protein_coding	NP_835232.2	ZDB-GENE-030131-2005	.	-5.77826	1181.37	0.218017	-11.6075	3.77403e-31	9.22269e-29	8.44343	10.9763	10.5789	10.6935	10.2708	9.20629	9.05931	8.97238	1938	2044	1325	614	331	307	31.5606	32.5415	22.7705	6.03707	4.94325	4.29021	102.622	101.503	76.3029	19.7529	15.6431	14.156
323465	NM_214688	vcanb	versican b	protein_coding	NP_999853.1	ZDB-GENE-030131-2185	.	-2.23959	1370.83	0.243769	-4.77188	1.82514e-06	2.45177e-05	9.72474	10.8884	10.4348	10.9738	10.465	10.0169	9.87407	10.03	1348	2289	1327	1315	732	949	10.6168	17.6223	11.0249	6.25835	5.28488	6.42082	34.5212	54.9672	36.9439	20.4769	16.7242	21.1863
323473	NM_199515	prdm1a	PR domain containing 1a, with ZNF domain	protein_coding	NP_955809.2	ZDB-GENE-030131-2193	.	3.10315	369.504	0.21069	7.75422	8.88899e-15	5.06672e-13	9.12637	7.49296	7.91254	8.05951	7.73283	8.79668	8.74905	8.87033	165	190	119	814	518	629	1.97444	2.22032	1.49461	5.87825	5.67727	6.46343	6.42002	6.92558	5.00838	19.2333	17.9659	21.3268
323588	XM_021477349	pik3r5	phosphoinositide-3-kinase, regulatory subunit 5, transcript variant X1	protein_coding	XP_021333024.1	ZDB-GENE-030131-2308	.	3.0542	92.1851	0.339703	4.74177	2.11859e-06	2.78889e-05	7.11671	5.51049	5.8164	6.28601	5.88607	6.81398	6.76585	6.65404	27	62	30	222	141	129	0.283104	0.634536	0.323353	1.40566	1.35756	1.15701	0.920532	1.97924	1.08354	4.59922	4.29605	3.81769
323659	NM_001256603,XM_005163382,XM_005163383,XM_005163384,XM_005163385,XM_021478828,XM_021478829	asph	aspartate beta-hydroxylase	protein_coding	NP_001243532.1;XP_005163439.1;XP_005163440.1;XP_005163441.1;XP_005163442.1;XP_021334503.1;XP_021334504.1	ZDB-GENE-031112-5	.	-2.02459	1002.6	0.173905	-5.85165	4.86724e-09	1.16118e-07	9.37375	10.39	10.2188	10.2738	10.0639	9.48354	9.65064	9.66074	1266	1260	1009	839	698	749	17.8743	17.8764	16.0128	7.47325	9.48894	9.37617	58.1194	55.7599	53.6581	24.452	30.0281	30.9378
323681	NM_001130587,XM_005170905,XM_009307741	tmem154	transmembrane protein 154	protein_coding	NP_001124059.1;XP_005170962.1;XP_009306016.1	ZDB-GENE-030131-2401	.	2.6967	102.335	0.3447	4.15201	3.29566e-05	0.0003127	7.22329	5.78772	6.26999	6.05786	6.28994	6.72172	7.20766	6.61819	56	35	55	178	220	110	1.12632	0.433537	1.18741	2.68302	2.9565	1.26678	3.66232	1.35228	3.97897	8.77866	9.35595	4.17988
323739	NM_001193525	fam213aa	family with sequence similarity 213, member Aa	protein_coding	NP_001180454.1	ZDB-GENE-030131-2459	.	-2.12158	271.881	0.197063	-5.50657	3.65898e-08	7.25199e-07	7.44725	8.52842	8.37465	8.1644	8.34736	7.62216	7.75424	7.76207	368	268	339	226	182	195	12.7356	9.07557	12.3736	4.71472	5.76384	5.77746	41.4108	28.3084	41.4635	15.4263	18.2399	19.0634
323754	XM_021466904,XM_021466905	atp8b2	ATPase, aminophospholipid transporter, class I, type 8B, member 2, transcript variant X1	protein_coding	XP_021322579.1;XP_021322580.1	ZDB-GENE-030131-2474	.	-2.16427	647.382	0.21153	-5.26583	1.39554e-07	2.43965e-06	8.67627	9.79063	9.56082	9.31733	9.76977	8.96085	8.88326	8.94324	804	567	965	629	380	436	4.30666	2.99327	5.39	2.025	1.92556	2.01789	14.0034	9.33657	18.0617	6.62568	6.09352	6.65828
323926	NM_001077430	nsrp1	nuclear speckle splicing regulatory protein 1	protein_coding	NP_001070898.1	ZDB-GENE-030131-2646	.	2.13874	68.8142	0.297423	3.68755	0.000226427	0.00160961	6.55186	5.45306	5.71207	5.85663	5.84786	6.20172	6.41733	6.19081	33	41	41	124	113	87	0.83963	1.01794	1.07957	1.90578	2.63545	1.90399	2.73012	3.17516	3.61761	6.2356	8.33997	6.28242
323944	NM_001199968	si:ch1073-155h21.1	si:ch1073-155h21.1	protein_coding	NP_001186897.2	ZDB-GENE-030131-2664	.	2.34556	15.9599	0.620935	1.98077	0.0476167	0.123726	4.48694	3.24735	3.75059	3.67576	3.94412	3.88689	4.04657	4.24162	7	4	14	20	21	34	0.11055	0.061991	0.241159	0.191872	0.308053	0.47976	0.359462	0.193363	0.808113	0.627792	0.974844	1.58302
324010	NM_205546	hnf4b	hepatic nuclear factor 4, beta	protein_coding	NP_991109.1	ZDB-GENE-030131-2730	.	2.14502	90.6425	0.253775	4.33845	1.4349e-05	0.000151183	6.95129	5.84635	6.25207	6.10067	6.19753	6.63462	6.73938	6.691	59	42	51	169	131	130	1.80871	1.23693	1.62239	3.13276	3.68222	3.42229	5.88114	3.8582	5.43656	10.2502	11.6525	11.2922
324015	NM_199664	ube2d1b	ubiquitin-conjugating enzyme E2D 1b	protein_coding	NP_955958.1	ZDB-GENE-030131-2735	.	-2.05445	330.396	0.226456	-4.58699	4.49688e-06	5.45107e-05	7.76077	8.79412	8.575	8.63162	8.51543	7.76202	8.1244	8.09266	405	405	359	226	251	255	17.1548	16.7703	16.0503	5.78078	9.76662	9.2821	55.7799	52.3096	53.784	18.9143	30.9068	30.6274
324025	NM_001077611	dars	aspartyl-tRNA synthetase	protein_coding	NP_001071079.1	ZDB-GENE-061110-135	.	2.14953	2314.89	0.160806	6.86553	6.62465e-12	2.58801e-10	11.6255	10.5218	10.748	10.8557	10.6897	11.4886	11.4464	11.2968	1310	1404	1155	5060	3239	2902	25.8219	27.0517	24.0138	60.2756	58.5719	49.1656	83.9618	84.3795	80.4694	197.218	185.353	162.228
324079	NM_199668	adi1	acireductone dioxygenase 1	protein_coding	NP_955962.1	ZDB-GENE-030131-2799	.	2.63622	207.112	0.260794	5.36235	8.21453e-08	1.5132e-06	8.23139	6.82893	7.26168	7.19964	7.13422	7.63447	8.1308	7.97293	114	97	89	307	374	330	3.72951	3.09585	3.05837	6.07532	11.2515	9.28826	12.1268	9.65652	10.2485	19.8781	35.6058	30.6477
324096	NM_001305553	slitrk6	SLIT and NTRK-like family, member 6	protein_coding	NP_001292482.1	ZDB-GENE-030131-2816	.	2.13401	1297.16	0.206193	5.30362	1.13526e-07	2.02627e-06	10.7868	9.69297	10.0408	9.68423	10.0414	10.567	10.5211	10.625	863	505	821	2590	1650	1963	9.76373	5.57794	9.78986	17.7022	17.1219	19.075	31.7475	17.3986	32.8054	57.9204	54.1829	62.9401
324123	NM_001089330	dgcr14	DiGeorge syndrome critical region gene 14	protein_coding	NP_001082799.2	ZDB-GENE-030131-2843	.	2.05743	613.088	0.159562	6.52312	6.88585e-11	2.26937e-09	9.68849	8.6476	8.85464	8.97642	8.83486	9.46075	9.5342	9.44867	349	383	323	1187	866	832	6.09502	6.53536	5.9489	12.5215	13.8755	12.4811	19.8184	20.385	19.9345	40.9696	43.9095	41.1829
324358	XM_005174119,XR_002456555	si:ch211-200e2.1	si:ch211-200e2.1, transcript variant X2	protein_coding	XP_005174176.1	ZDB-GENE-030131-3078	.	3.45029	38.0497	0.398219	4.48678	7.23088e-06	8.30918e-05	5.88335	4.09344	4.83525	4.81632	4.83279	5.40205	5.60121	5.24756	16	14	15	83	76	46	0.260332	0.220795	0.256701	0.856693	1.25618	0.672293	0.846487	0.6887	0.860194	2.80305	3.97521	2.21831
324372	XM_021477213	si:dkey-195m11.8	si:dkey-195m11.8	protein_coding	XP_021332888.1	ZDB-GENE-030131-3092	.	-3.25563	348.009	0.228544	-7.45124	9.24647e-14	4.67843e-12	7.35194	9.05706	8.90548	8.68305	8.5344	7.83573	7.63584	7.86974	598	437	374	260	128	193	6.7613	4.8366	4.46619	1.77808	1.32945	1.87433	21.9849	15.0863	14.966	5.81778	4.20711	6.18457
324413	NM_212679	bhlhe40	basic helix-loop-helix family, member e40	protein_coding	NP_997844.2	ZDB-GENE-030131-3133	.	-2.16315	2531.54	0.211908	-5.25292	1.49708e-07	2.59347e-06	10.6445	11.7575	11.6447	11.2584	11.6668	10.876	10.9924	10.7762	3548	2149	3456	2333	1809	1456	57.0409	33.7608	58.5996	22.6529	26.6675	20.0965	185.473	105.306	196.365	74.1189	84.3904	66.3108
324520	XM_694448	abraa	actin binding Rho activating protein a	protein_coding	XP_699540.2	ZDB-GENE-120730-1	.	-3.15327	299.318	0.295099	-5.61454	1.97081e-08	4.13815e-07	7.16944	8.82872	8.39556	8.82487	8.10504	7.65558	7.45644	7.62352	375	566	252	237	117	160	5.89079	8.70783	4.17408	2.25302	1.6784	2.15504	19.1543	27.1613	13.9872	7.37173	5.31135	7.11082
324556	NM_199687	taldo1	transaldolase 1	protein_coding	NP_955981.1	ZDB-GENE-030131-3277	.	2.47361	404.393	0.222196	5.88049	4.0905e-09	9.93266e-08	9.16962	7.86361	8.07199	8.39503	8.03623	8.89553	8.96504	8.8553	182	265	164	838	609	569	7.31365	10.4006	6.94502	20.3334	22.4232	19.6503	23.7808	32.4415	23.2725	66.5297	70.9591	64.8385
324610	XM_021476836,XM_021476837,XM_021476839,XM_021476842,XM_021476843,XM_021476844,XM_021476846,XM_021476851,XM_021476854,XR_002459000	wu:fc34e06	wu:fc34e06, transcript variant X10	protein_coding	XP_021332511.1;XP_021332512.1;XP_021332514.1;XP_021332517.1;XP_021332518.1;XP_021332519.1;XP_021332521.1;XP_021332526.1;XP_021332529.1	ZDB-GENE-030131-3331	.	-2.0195	223.474	0.348029	-2.91354	0.00357355	0.01631	7.21106	8.22295	7.63925	7.85688	8.32084	7.32685	7.71927	7.18453	178	220	385	187	214	106	0.845999	1.01097	1.90982	0.530307	0.90934	0.422801	2.75083	3.15341	6.39972	1.73513	2.87764	1.39508
324714	NM_001305565	styk1	serine/threonine/tyrosine kinase 1	protein_coding	NP_001292494.1	ZDB-GENE-030131-3435	.	3.52502	81.7333	0.305689	5.94602	2.74735e-09	6.88967e-08	6.99093	5.18065	5.65632	5.88538	5.83459	6.73549	6.54609	6.45225	24	37	34	226	120	112	0.489343	0.742134	0.742319	2.82985	2.27933	1.99498	1.59113	2.31485	2.48748	9.25908	7.21303	6.58267
324910	NM_001114885,NM_001328508	sema7a	semaphorin 7A	protein_coding	NP_001108357.2;NP_001315437.1	ZDB-GENE-030131-3633	.	-2.81556	292.842	0.191405	-7.80244	6.07234e-15	3.55836e-13	7.25985	8.7563	8.56336	8.41462	8.37402	7.71236	7.64359	7.57257	447	353	342	250	151	144	7.82892	6.00402	6.36641	2.70598	2.38965	2.2923	25.4563	18.7277	21.3336	8.8538	7.56215	7.56371
324940	NM_001040035,NM_001044310,XM_005159050	aars	alanyl-tRNA synthetase	protein_coding	NP_001035124.2;NP_001037775.1;XP_005159107.1	ZDB-GENE-030131-3663	.	2.66447	4426.26	0.135302	10.4495	1.47253e-25	2.34899e-23	12.6521	11.2383	11.5718	11.5851	11.5174	12.4415	12.4135	12.3102	2243	2135	1987	10038	6530	6176	27.6025	25.2946	25.813	73.8448	73.2665	65.0746	89.7516	78.8986	86.4984	241.616	231.855	214.721
324942	NM_001305567,XM_001923728,XM_017351597,XM_021467117	grhl1	grainyhead-like transcription factor 1	protein_coding	NP_001292496.1;XP_001923763.1;XP_017207086.1;XP_021322792.1	ZDB-GENE-030131-3665	.	2.36475	250.518	0.295787	4.19791	2.69393e-05	0.000261769	8.4604	7.21723	7.45068	7.25913	7.78834	8.02567	8.39303	8.11637	122	84	186	426	440	338	1.13775	0.764294	2.15727	3.34458	4.15802	3.48549	3.69949	2.38398	7.22893	10.9433	13.1582	11.5008
324947	NM_199701,XM_005159006	sephs1	selenophosphate synthetase 1	protein_coding	NP_955995.2;XP_005159063.1	ZDB-GENE-030131-3670	.	-2.4354	266.882	0.215283	-5.96498	2.4466e-09	6.19207e-08	7.28397	8.56193	8.40509	8.27617	8.19072	7.44226	7.67617	7.67937	392	316	290	181	170	181	7.65923	6.02331	5.95171	2.12914	3.03717	3.01896	24.9045	18.7878	19.9439	6.96641	9.61122	9.96142
325004	NM_212691	sdcbp2	syndecan binding protein (syntenin) 2	protein_coding	NP_997856.1	ZDB-GENE-030131-3727	.	2.37018	1214.84	0.160447	7.75955	8.52332e-15	4.88252e-13	10.7389	9.49328	9.7786	9.82644	9.72778	10.3695	10.5802	10.5393	658	655	585	2175	1846	1869	11.5352	11.226	10.8191	23.0587	29.7031	28.1712	37.5075	35.0161	36.2545	75.4466	93.9965	92.9543
325276	NM_001082996	cfap45	cilia and flagella associated protein 45	protein_coding	NP_001076465.2	ZDB-GENE-070209-143	.	2.58692	149.542	0.220935	6.2065	5.41792e-10	1.55181e-08	7.75252	6.38262	6.65166	6.83052	6.8283	7.44125	7.45555	7.47531	62	78	79	311	213	231	1.44682	1.77151	1.94481	4.4169	4.59059	4.65577	4.70445	5.52567	6.51697	14.4518	14.5271	15.3623
325423	NM_001017860	fstl1a	follistatin-like 1a	protein_coding	NP_001017860.1	ZDB-GENE-030131-4148	.	2.26926	87.0115	0.293992	4.02127	5.78851e-05	0.000505581	6.91706	5.73265	6.12341	6.23875	5.89804	6.54083	6.63999	6.70753	51	58	31	157	121	140	1.50904	1.67877	0.955416	2.82685	3.30399	3.57644	4.90676	5.23638	3.20156	9.24926	10.4556	11.8009
325557	NM_181761	anxa2a	annexin A2a	protein_coding	NP_861426.1	ZDB-GENE-030131-4282	.	3.48564	621.223	0.237373	7.58901	3.22366e-14	1.71811e-12	9.91489	8.11432	8.30403	8.73864	8.57839	9.57222	9.68375	9.4482	173	304	248	1422	1078	881	5.41425	9.33142	8.1985	26.9847	31.0575	23.7672	17.6048	29.1064	27.4728	88.2923	98.2826	78.4226
325712	NM_001305569,NM_001305570	ndufab1b	NADH dehydrogenase (ubiquinone) 1, alpha/beta subcomplex, 1b	protein_coding	NP_001292498.1;NP_001292499.1	ZDB-GENE-030131-4437	.	-2.06123	139.8	0.217705	-4.7932	1.64139e-06	2.23765e-05	6.51569	7.55535	7.33309	7.21607	7.39552	6.7468	6.83893	6.80758	175	141	180	125	96	97	11.3939	8.91849	12.3481	4.91527	5.67829	5.38315	37.0482	27.8184	41.3779	16.0825	17.9692	17.7623
325875	NM_199730,XR_001796551	dgat1a	diacylglycerol O-acyltransferase 1a	protein_coding	NP_956024.1	ZDB-GENE-030131-4600	.	-2.55786	300.023	0.253217	-5.3509	8.75174e-08	1.59679e-06	7.39649	8.75342	8.55964	8.12592	8.64961	7.81058	7.6814	7.6923	437	244	460	279	155	167	7.2719	3.9568	7.9506	2.80039	2.50752	2.67398	23.6451	12.342	26.6421	9.16269	7.93515	8.82313
325886	NM_001020482	cpa1	carboxypeptidase A1 (pancreatic)	protein_coding	NP_001018318.1	ZDB-GENE-050522-438	.	-3.53192	13.5041	0.72143	-2.5234	0.0116227	0.0417295	2.59327	4.3905	3.73804	3.93386	3.73205	3.34516	3.34414	3.64812	16	24	15	4	2	14	0.483326	0.688769	0.453722	0.072352	0.056033	0.342983	1.57157	2.1484	1.5204	0.236732	0.177318	1.13171
325906	NM_199731	ttpa	tocopherol (alpha) transfer protein	protein_coding	NP_956025.2	ZDB-GENE-030131-4631	.	-2.38073	101.368	0.309858	-4.03864	5.37622e-05	0.000473713	5.91165	7.15521	7.02098	6.85982	6.64176	6.16587	6.46717	6.12956	161	123	93	75	82	49	3.85281	2.87653	2.33121	1.08351	1.79472	0.999752	12.5277	8.97245	7.81178	3.54518	5.67945	3.2988
326020	XM_017352544,XM_021468555	si:dkey-121j17.5	si:dkey-121j17.5, transcript variant X2	protein_coding	XP_017208033.2;XP_021324230.1	ZDB-GENE-030131-4745	.	-4.20413	87.8377	0.307207	-6.74401	1.54074e-11	5.67187e-10	5.06814	7.15104	6.8225	6.49193	6.72386	5.86506	5.79858	5.62676	153	94	129	61	35	25	2.18106	1.31983	1.94028	0.518837	0.45673	0.308436	7.09188	4.11681	6.50179	1.6976	1.44534	1.01772
326281	XM_001340280,XM_002665557,XM_002665561,XM_002665562,XM_005170079,XM_005170080,XM_005170081,XM_005170082,XM_021468312	mbpa	myelin basic protein a, transcript variant X1	protein_coding	XP_001340316.2;XP_002665603.1;XP_002665607.1;XP_002665608.1;XP_005170136.1;XP_005170137.1;XP_005170138.1;XP_005170139.1;XP_021323987.1	ZDB-GENE-030128-2	.	-3.81645	943.341	0.214899	-8.99134	2.44236e-19	2.27139e-17	8.61558	10.5454	10.188	10.3544	9.98515	8.91714	9.1924	9.11514	1366	1528	1039	457	451	430	31.4553	34.4112	25.3585	6.40631	9.50824	8.36559	102.279	107.335	84.9752	20.961	30.0892	27.6032
326287	NM_175084	epb41b	erythrocyte membrane protein band 4.1b	protein_coding	NP_778259.1	ZDB-GENE-030130-1	.	-9.04625	202.215	0.24324	-13.0625	5.3936e-39	2.21244e-36	5.32628	8.50902	7.76362	8.08114	7.94206	6.3789	6.30982	6.41698	274	364	318	62	34	46	2.39516	3.11014	2.92834	0.324393	0.269565	0.345552	7.78803	9.70111	9.81274	1.0614	0.853049	1.14019
326672	NM_001023580	ets2	v-ets avian erythroblastosis virus E26 oncogene homolog 2	protein_coding	NP_001018874.1	ZDB-GENE-050522-552	.	2.06735	626.325	0.174554	6.00263	1.94146e-09	4.99969e-08	9.72159	8.67371	8.83702	8.90664	9.00034	9.49272	9.62055	9.41481	335	344	395	1216	943	790	7.23346	7.25535	9.01019	15.8777	18.6896	14.6636	23.5201	22.6308	30.1928	51.9507	59.144	48.3842
326722	XM_005168803	si:ch1073-159d7.13	si:ch1073-159d7.13	protein_coding	XP_005168860.1	ZDB-GENE-030131-4921	.	2.35818	185.268	0.260459	4.75188	2.01538e-06	2.67294e-05	8.02453	6.78327	7.17731	6.96291	7.18084	7.52827	7.74481	7.94445	111	74	106	290	255	342	4.59871	2.98141	4.63121	7.25502	9.66713	12.1813	14.953	9.29957	15.519	23.738	30.592	40.1936
326845	NM_001348086,XM_021474933	slco1d1	solute carrier organic anion transporter family, member 1D1	protein_coding	NP_001335015.1;XP_021330608.1	ZDB-GENE-030131-5044	.	-2.31404	363.043	0.262816	-4.60554	4.114e-06	5.02674e-05	7.7774	8.98495	9.00725	8.46675	8.6392	7.90633	8.06467	8.18828	632	317	396	261	218	273	9.67352	5.19845	7.24346	2.31273	3.05971	3.23264	31.4541	16.2149	24.2725	7.5671	9.68257	10.6665
327067	NM_214702	slc25a4	solute carrier family 25 (mitochondrial carrier; adenine nucleotide translocator), member 4	protein_coding	NP_999867.1	ZDB-GENE-030131-5275	.	-2.88207	886.118	0.328301	-4.65154	3.29473e-06	4.14022e-05	8.83503	10.3615	9.95697	10.4648	9.50191	8.99641	9.14535	9.32255	1087	1754	609	536	440	588	33.7944	53.3173	19.9758	10.0613	12.5374	15.6932	109.885	166.307	66.9379	32.9199	39.675	51.7816
327162	NM_001102617	tmem51b	transmembrane protein 51b	protein_coding	NP_001096087.1	ZDB-GENE-030131-5373	.	2.13465	43.6384	0.359258	3.04516	0.00232555	0.0114709	5.89412	4.79731	5.1305	5.28159	5.15236	5.52329	5.74965	5.48291	22	29	22	78	75	52	0.677341	0.889995	0.723234	1.49728	2.18671	1.42618	2.20242	2.77606	2.42353	4.89902	6.91991	4.70585
327179	XM_002666402	top1	topoisomerase (DNA) I	protein_coding	XP_002666448.2	ZDB-GENE-030131-5390	.	-3.73172	71.3378	0.316583	-6.00108	1.96014e-09	5.04214e-08	4.90837	6.81564	6.22102	6.27614	6.57257	5.61418	5.58928	5.48661	84	85	127	50	31	26	1.27852	1.25998	2.0307	0.457299	0.430617	0.337954	4.15719	3.93011	6.80479	1.49625	1.3627	1.11512
327214	NM_213663,XM_017358989	tmem33	transmembrane protein 33	protein_coding	NP_998828.1;XP_017214478.1	ZDB-GENE-030131-5425	.	-2.19139	191.758	0.268364	-4.21759	2.46922e-05	0.000242603	6.91471	8.03818	7.93662	7.73871	7.66286	6.94352	7.35556	7.25005	287	212	196	120	149	136	7.52851	5.40353	5.37315	1.91382	3.58697	3.06343	24.4795	16.8546	18.0052	6.2619	11.3511	10.1081
327244	NM_199773	dnajb1b	DnaJ (Hsp40) homolog, subfamily B, member 1b	protein_coding	NP_956067.1	ZDB-GENE-030131-5455	.	12.742	1804.47	0.221314	16.5896	8.28315e-62	1.5856e-58	11.7083	8.03705	9.01715	9.21529	8.93729	10.9079	11.1677	11.2515	221	288	181	3972	3478	4008	5.61105	7.14999	4.83531	61.0124	81.1151	87.558	18.2447	22.3022	16.2029	199.629	256.692	288.908
327285	NM_212709,XM_005161147	ppp1r3b	protein phosphatase 1, regulatory subunit 3B	protein_coding	NP_997874.1;XP_005161204.1	ZDB-GENE-030131-5496	.	-6.57713	44.2995	0.450805	-6.02802	1.6598e-09	4.34746e-08	3.56442	6.26244	5.62139	5.72792	5.56776	4.59059	4.59013	4.93783	68	74	60	11	6	23	1.48775	1.38443	1.06482	0.109761	0.093951	0.336058	4.83753	4.3183	3.56817	0.359131	0.29731	1.10886
327377	NM_199795	tuba4l	tubulin, alpha 4 like	protein_coding	NP_956089.1	ZDB-GENE-030131-5588	.	2.01809	37.5671	0.425424	2.38113	0.0172597	0.0569236	5.65051	4.63826	4.78236	5.08667	5.09661	5.2423	5.25441	5.52948	12	26	27	61	42	70	0.33334	0.724848	0.807842	1.04867	1.10021	1.72405	1.08388	2.26093	2.70705	3.43118	3.48165	5.68872
327379	NM_182967	calm3a	calmodulin 3a (phosphorylase kinase, delta)	protein_coding	NP_892012.1	ZDB-GENE-030131-5590	.	-2.54342	1618.13	0.181546	-7.41835	1.18589e-13	5.94782e-12	9.83579	11.1814	11.0054	10.9729	10.7829	10.0186	10.2605	10.1279	2315	2091	1720	1147	1053	941	48.0672	42.4331	37.6545	14.3766	20.0525	16.7816	156.294	132.357	126.179	47.0392	63.4568	55.3728
327387	NM_199796,XM_005166011	bin2b	bridging integrator 2b	protein_coding	NP_956090.1;XP_005166068.1	ZDB-GENE-030131-5598	.	2.67274	58.0453	0.338528	4.18967	2.7936e-05	0.000270881	6.4014	4.98004	5.39731	5.37365	5.63838	5.95099	6.1654	6.00894	24	21	38	108	99	84	0.418478	0.36282	0.709409	1.17742	1.62687	1.29733	1.36071	1.1317	2.3772	3.85243	5.14829	4.28071
327396	NM_199798,XM_021477407,XM_021477408	rrad	Ras-related associated with diabetes	protein_coding	NP_956092.1;XP_021333082.1;XP_021333083.1	ZDB-GENE-030131-5607	.	2.49155	514.724	0.196613	6.69868	2.10314e-11	7.60808e-10	9.5209	8.2036	8.46052	8.61961	8.47065	9.21077	9.42089	9.12776	248	288	239	1023	869	661	6.20776	7.00632	6.32435	15.5348	20.0351	14.2815	20.185	21.854	21.1926	50.8287	63.4019	47.1237
327506	NM_001308608,NM_001308609	ckmt2a	creatine kinase, mitochondrial 2a (sarcomeric)	protein_coding	NP_001295537.1;NP_001295538.1	ZDB-GENE-030131-5717	.	-2.33729	1015.72	0.178317	-6.86887	6.47132e-12	2.54542e-10	9.24987	10.4743	10.3469	10.0362	10.299	9.51488	9.54338	9.52853	1468	968	1324	882	613	637	43.6757	28.1244	41.5574	15.8389	16.6974	16.2538	142.015	87.7252	139.257	51.824	52.8395	53.6314
327512	NM_199819	psat1	phosphoserine aminotransferase 1	protein_coding	NP_956113.1	ZDB-GENE-030131-5723	.	2.81273	571.925	0.183161	8.14568	3.77168e-16	2.52593e-14	9.72126	8.22764	8.68477	8.49977	8.57959	9.31846	9.53901	9.42975	311	225	256	1093	939	881	8.29792	5.87537	7.22079	17.6445	23.0109	20.2383	26.9813	18.3264	24.1966	57.7318	72.8188	66.7786
327586	XM_009296424,XM_017351148	si:ch73-40a17.3	si:ch73-40a17.3, transcript variant X1	protein_coding	XP_009294699.1;XP_017206637.2	ZDB-GENE-030131-5797	.	-6.09067	24.6537	0.523008	-4.98387	6.2326e-07	9.42522e-06	2.77268	5.4085	4.71347	4.51953	4.94061	4.10153	3.98856	4.0853	37	24	51	13	4	8	0.577211	0.356888	0.832741	0.11563	0.045608	0.108283	1.87684	1.1132	2.79048	0.378335	0.14433	0.357293
327635	NM_199841,XM_021479111	gnsb	glucosamine (N-acetyl)-6-sulfatase (Sanfilippo disease IIID), b	protein_coding	NP_956135.2;XP_021334786.1	ZDB-GENE-030131-5846	.	2.13849	556.644	0.207525	5.28414	1.26297e-07	2.22654e-06	9.56744	8.46989	8.71855	8.85726	8.57935	9.19937	9.48924	9.32841	321	360	252	944	882	779	3.01073	3.47771	2.96818	7.70597	8.91674	7.13468	9.78961	10.8476	9.94624	25.2134	28.2174	23.5417
333938	NM_001098177,XM_005165694,XM_005165695,XM_021476787	myh9a	myosin, heavy chain 9a, non-muscle	protein_coding	NP_001091647.2;XP_005165751.1;XP_005165752.1;XP_021332462.1	ZDB-GENE-030131-5870	.	2.52867	1944.98	0.239796	5.58131	2.38707e-08	4.92663e-07	11.4447	10.1065	10.1868	10.2899	10.6642	11.2501	11.257	11.0339	754	812	1328	4411	2981	2467	4.92253	5.34046	9.42867	17.8432	17.952	14.2861	16.006	16.6579	31.5951	58.3818	56.8098	47.1387
334036	NM_001040389,NM_212718	si:dkeyp-50f7.2	si:dkeyp-50f7.2	protein_coding	NP_001035479.1;NP_997883.1	ZDB-GENE-030131-5968	.	2.0866	59.2172	0.317313	3.34419	0.000825224	0.00481397	6.32351	5.26102	5.62724	5.67636	5.53316	5.98976	5.9264	6.20454	36	37	28	108	66	105	0.65293	0.664669	0.547613	1.21181	1.11451	1.67325	2.12305	2.07323	1.83503	3.96497	3.52691	5.52108
334082	NM_199856,XM_021479554	tdo2b	tryptophan 2,3-dioxygenase b	protein_coding	NP_956150.1;XP_021335229.1	ZDB-GENE-030131-6014	.	3.07741	80.073	0.312662	5.18679	2.13947e-07	3.60699e-06	6.91891	5.29065	6.01079	5.65282	5.80514	6.46432	6.5868	6.57319	50	22	32	160	127	132	1.20498	0.51245	0.807855	2.37494	2.84423	2.76666	3.91809	1.59843	2.70709	7.77066	9.00066	9.12892
334151	NM_001328536,NM_199866,XM_005167008,XM_009303986	tmem9	transmembrane protein 9	protein_coding	NP_001315465.1;NP_956160.2;XP_005167065.1;XP_009302261.1	ZDB-GENE-030131-6083	.	-2.30721	172.998	0.230094	-5.242	1.58845e-07	2.73876e-06	6.71343	7.91321	7.76797	7.57006	7.59523	6.93499	7.16988	6.9715	254	187	196	134	127	100	5.38844	3.81106	4.39649	1.68125	2.41569	1.78443	17.5209	11.8874	14.7325	5.50095	7.64455	5.88794
334273	NM_199881,XM_017357732,XM_021479039,XM_021479043	pls1	plastin 1 (I isoform)	protein_coding	NP_956175.1;XP_017213221.1;XP_021334714.1;XP_021334718.1	ZDB-GENE-030131-6205	.	-2.17805	160.947	0.233205	-4.81566	1.46713e-06	2.03821e-05	6.66032	7.78625	7.63186	7.47386	7.48821	6.99614	6.79935	7.06682	227	175	181	158	77	124	3.17154	2.40936	2.96566	1.33402	0.975922	1.52057	10.3125	7.51523	9.93781	4.36483	3.08834	5.01731
334296	NM_199884,XM_005158494	mtfr1l	mitochondrial fission regulator 1-like	protein_coding	NP_956178.1;XP_005158551.1	ZDB-GENE-030131-6228	.	-2.14103	516.509	0.206239	-5.32542	1.0072e-07	1.81036e-06	8.36213	9.45938	9.40325	9.15069	9.13084	8.55263	8.52486	8.75536	776	545	541	446	287	413	12.9405	8.90527	9.45973	4.64778	4.42644	6.4936	42.0771	27.7772	31.6992	15.2073	14.0076	21.4264
334393	NM_199896	iars	isoleucyl-tRNA synthetase	protein_coding	NP_956190.2	ZDB-GENE-030131-6325	.	2.79034	2657.72	0.15257	9.70335	2.91754e-22	3.58389e-20	11.934	10.4539	10.7411	10.8962	10.7318	11.7194	11.6346	11.6203	1196	1369	1123	6160	3767	3928	13.3035	14.8837	13.175	41.4114	38.4468	37.5582	43.2571	46.425	44.149	135.496	121.666	123.928
334402	NM_199898,XM_017358699	brf1a	BRF1, RNA polymerase III transcription initiation factor a	protein_coding	NP_956192.1;XP_017214188.1	ZDB-GENE-030131-6334	.	3.86958	683.167	0.218823	8.92125	4.61048e-19	4.12091e-17	10.0843	8.13307	8.47463	8.80602	8.54295	9.78386	9.79588	9.56705	207	311	218	1713	1165	960	2.4347	3.57372	2.71133	12.2263	12.6309	9.7701	7.91661	11.1471	9.08556	40.0037	39.9709	32.2376
334459	XM_002664481	si:ch211-113d11.5	si:ch211-113d11.5	protein_coding	XP_002664527.1	ZDB-GENE-030131-6391	.	-7.86952	103.585	0.32492	-9.16002	5.18862e-20	5.15965e-18	4.57375	7.5185	6.93018	6.92123	6.95637	5.4564	5.84986	5.56536	166	154	163	22	37	20	3.1276	2.83285	3.23995	0.241971	0.631164	0.312046	10.1696	8.83618	10.8569	0.791715	1.99734	1.02963
334561	NM_001099739	acsl4b	acyl-CoA synthetase long-chain family member 4b	protein_coding	NP_001093209.1	ZDB-GENE-030131-6493	.	2.40141	458.235	0.200927	6.29027	3.16915e-10	9.35713e-09	9.33756	8.07413	8.25245	8.55727	8.29837	9.0485	9.12044	9.08565	206	292	209	914	666	678	2.41682	3.34787	2.59336	6.49849	7.18567	6.84858	7.85846	10.4426	8.69023	21.2627	22.7393	22.5977
334599	NM_199917	synj2bp	synaptojanin 2 binding protein	protein_coding	NP_956211.1	ZDB-GENE-030131-6531	.	-2.00217	75.676	0.282885	-3.54054	0.00039931	0.00262748	5.66424	6.65307	6.38485	6.41517	6.39598	5.79521	6.0173	6.05309	90	88	87	55	55	62	2.4135	2.2925	2.46716	0.888758	1.34396	1.42839	7.84766	7.15073	8.26736	2.90796	4.25301	4.71314
334613	NM_001013261,XM_005160284,XM_009305554	fn1b	fibronectin 1b	protein_coding	NP_001013279.1;XP_005160341.1;XP_009303829.1	ZDB-GENE-030131-6545	.	2.74491	6950.53	0.166038	8.77364	1.72987e-18	1.47721e-16	13.3147	11.858	12.0828	12.3258	12.1322	13.0241	13.1026	13.0042	2959	3786	3003	14693	10728	10212	15.5136	19.6339	16.8807	47.1659	51.8642	46.5428	50.4435	61.2419	56.5665	154.324	164.126	153.573
335032	XM_017353005	rapgef6	Rap guanine nucleotide exchange factor (GEF) 6	protein_coding	XP_017208494.2	ZDB-GENE-030131-6972	.	2.24234	4547.58	0.16936	6.87888	6.03257e-12	2.39334e-10	12.6188	11.454	11.6	11.7257	11.7965	12.5224	12.3657	12.2893	2220	2442	2711	10637	6007	5843	24.1675	25.9779	31.1329	69.9584	59.977	54.6511	78.5825	81.0298	104.325	228.899	189.8	180.328
335176	NM_212734	pon2	paraoxonase 2	protein_coding	NP_997899.1	ZDB-GENE-030131-7116	.	-2.58927	92.4313	0.321592	-4.26798	1.97254e-05	0.000199083	5.67763	7.06262	6.45669	6.83933	6.83899	6.25445	6.05349	5.94097	84	132	134	100	47	40	3.21082	4.91128	5.37388	2.29994	1.64998	1.31471	10.4402	15.3192	18.0076	7.52526	5.22141	4.33805
335206	NM_199939,XM_005155942	arrdc2	arrestin domain containing 2	protein_coding	NP_956233.1;XP_005155999.1	ZDB-GENE-030131-7146	.	3.84045	1872.78	0.220591	8.80032	1.36427e-18	1.18259e-16	11.5371	9.59572	10.0395	10.2214	9.87066	11.0539	11.3722	11.0896	692	826	517	3815	3596	2818	11.391	13.3065	8.97397	38.0436	54.4309	39.9646	37.0386	41.5056	30.0714	124.476	172.249	131.868
335278	XM_021478401	si:rp71-61h23.4	si:rp71-61h23.4	protein_coding	XP_021334076.1	ZDB-GENE-030131-7218	.	4.18886	199.992	0.273518	7.55547	4.17336e-14	2.19373e-12	8.3349	6.26855	6.72887	7.0375	6.80485	7.79616	8.14211	7.7902	55	87	60	410	409	290	1.35008	2.09126	1.55945	6.1137	9.25682	6.13827	4.38988	6.52302	5.22565	20.0036	29.2936	20.2539
335340	XM_002666688	dnah5l	dynein, axonemal, heavy chain 5 like	protein_coding	XP_002666734.3	ZDB-GENE-091204-287	.	2.74627	1662.49	0.186306	7.823	5.15792e-15	3.05095e-13	11.251	9.79399	9.99349	10.3012	10.0627	11.0216	10.9256	10.9797	676	947	706	3775	2279	2562	2.07705	2.84331	2.28913	7.01097	6.4259	6.76664	6.75369	8.86881	7.67077	22.9394	20.335	22.3273
335380	NM_001201557	si:dkey-33c12.3	si:dkey-33c12.3	protein_coding	NP_001188486.1	ZDB-GENE-030131-7320	.	-3.14806	1530.67	0.133089	-12.4313	1.76764e-35	5.4871e-33	9.52801	11.1818	10.8456	10.8865	10.8964	9.87917	9.91992	9.95148	2050	2006	2060	1035	732	809	30.7913	29.444	32.6395	9.39027	10.0829	10.4414	100.12	91.8414	109.374	30.7244	31.9078	34.4527
335386	XM_002663243,XM_009304328	cfap74	cilia and flagella associated protein 74, transcript variant X1	protein_coding	XP_002663289.3;XP_009302603.1	ZDB-GENE-081104-480	.	3.82094	439.05	0.171333	11.2875	1.51234e-29	3.24673e-27	9.44261	7.50985	8.00043	8.00785	8.035	9.16786	9.06866	8.99596	163	154	163	1129	680	664	1.39199	1.28465	1.47124	5.88978	5.3527	4.89369	4.52614	4.00707	4.93006	19.271	16.9388	16.1473
335392	NM_001305473	si:ch211-153b23.4	si:ch211-153b23.4	protein_coding	NP_001292402.1	ZDB-GENE-030131-7332	.	4.55117	164.725	0.247069	8.8487	8.85432e-19	7.76308e-17	8.07666	5.8943	6.4333	6.62056	6.63091	7.74638	7.67517	7.49785	42	56	58	446	277	238	0.596376	0.781577	0.868882	3.87852	3.64979	2.94076	1.93916	2.43788	2.91159	12.6903	11.5499	9.70338
335409	NM_199950	socs3a	suppressor of cytokine signaling 3a	protein_coding	NP_956244.1	ZDB-GENE-030131-7349	.	4.06395	1312.97	0.203096	9.96022	2.27569e-23	3.03924e-21	11.0414	9.01783	9.53226	9.54737	9.43889	10.423	10.8602	10.6889	490	468	408	2365	2544	2247	11.1569	10.4014	9.7901	32.521	53.1177	43.952	36.2774	32.4439	32.8062	106.407	168.093	145.025
335475	NM_001308554	wu:fj16a03	wu:fj16a03	protein_coding	NP_001295483.1	ZDB-GENE-030131-7415	.	2.08218	41.7771	0.384124	2.75457	0.00587694	0.0244431	5.82014	4.75786	5.0876	5.2878	5.01218	5.40146	5.67265	5.46432	22	32	17	68	71	54	2.32848	3.35347	1.95236	4.51232	7.14	5.04582	7.57121	10.4601	6.54227	14.764	22.5948	16.6493
335494	NM_212740	fuca1.1	fucosidase, alpha-L- 1, tissue, tandem duplicate 1	protein_coding	NP_997905.1	ZDB-GENE-030131-7434	.	2.21709	491.515	0.168652	6.81087	9.70133e-12	3.67738e-10	9.40382	8.25574	8.56689	8.51066	8.51323	9.25042	9.20613	9.06002	293	254	259	1087	694	621	7.7489	6.56075	7.22568	17.3972	16.8733	14.1331	25.1961	20.4642	24.2129	56.9227	53.3961	46.6338
335530	XM_021477420	wu:fj19g03	wu:fj19g03	protein_coding	XP_021333095.1	ZDB-GENE-030131-7470	.	2.70685	88.4061	0.313173	4.58729	4.49027e-06	5.44855e-05	7.01131	5.57908	5.78823	6.08323	6.17803	6.74039	6.71752	6.56084	26	45	54	206	135	116	0.439196	0.729466	0.948592	2.09835	2.08692	1.68361	1.42808	2.27534	3.17869	6.86567	6.60412	5.55526
335616	NM_001012481	agr2	anterior gradient 2	protein_coding	NP_001012499.1	ZDB-GENE-050417-214	.	2.2805	71.8856	0.415277	2.86399	0.00418347	0.0184947	6.64438	5.45071	5.8025	5.97723	5.58978	6.08182	6.68705	6.06446	40	51	24	104	159	72	1.53587	1.90781	0.957884	2.42952	5.68999	2.40221	4.99401	5.95083	3.20983	7.94925	18.0062	7.92639
335650	NM_199964	rcvrn2	recoverin 2	protein_coding	NP_956258.1	ZDB-GENE-030131-7590	.	-2.1359	2893.46	0.305963	-3.57836	0.000345764	0.00232851	10.8501	11.9444	11.9599	11.3999	11.7153	10.7011	11.3807	11.0099	4685	2351	3416	1672	2661	1793	109.393	53.6441	84.1488	23.5822	56.9834	35.9529	355.701	167.326	281.979	77.1596	180.326	118.631
335651	NM_199965	rbp4l	retinol binding protein 4, like	protein_coding	NP_956259.1	ZDB-GENE-030131-7591	.	-2.32522	687.881	0.283182	-4.29888	1.71663e-05	0.000176433	8.69401	9.90931	9.77714	9.2873	9.82664	8.71853	9.18593	8.92023	1003	534	1007	439	546	411	52.6183	27.3724	55.7309	13.9012	26.2582	18.5141	171.092	85.3797	186.752	45.4839	83.0949	61.0894
335654	NM_199966,XM_021469304	camk1ga	calcium/calmodulin-dependent protein kinase IGa	protein_coding	NP_956260.1;XP_021324979.1	ZDB-GENE-030131-7594	.	-8.90936	451.046	0.330795	-9.5386	1.44778e-21	1.63827e-19	6.50088	9.66449	9.20673	8.68029	9.32683	7.62307	7.37376	7.13799	823	437	886	195	85	56	19.5225	10.1942	22.2056	2.8832	1.83771	1.17902	63.4789	31.7975	74.4102	9.43364	5.8155	3.89032
335656	NM_199967	gngt1	guanine nucleotide binding protein (G protein), gamma transducing activity polypeptide 1	protein_coding	NP_956261.1	ZDB-GENE-030131-7596	.	-15.2181	677.355	0.355706	-11.042	2.39535e-28	4.5853e-26	6.39108	10.3115	9.96547	8.98129	9.804	7.31026	7.67495	7.58678	1574	528	1275	78	106	96	101.842	33.39	87.0466	3.03665	6.28737	5.30194	331.148	104.15	291.69	9.93572	19.8966	17.4944
335715	NM_199969	mdh1ab	malate dehydrogenase 1Ab, NAD (soluble)	protein_coding	NP_956263.1	ZDB-GENE-030131-7655	.	-2.75338	278.744	0.205379	-7.11466	1.1219e-12	4.97512e-11	7.21872	8.67431	8.43131	8.43898	8.24843	7.45949	7.64592	7.65593	397	375	305	181	159	171	10.5433	9.71074	8.53057	2.89324	3.86851	3.88399	34.2823	30.2896	28.5856	9.4665	12.242	12.8157
335716	NM_199970,XM_021480031	nme2a	NME/NM23 nucleoside diphosphate kinase 2a	protein_coding	NP_956264.1;XP_021335706.1	ZDB-GENE-030131-7656	.	-5.39888	209.623	0.281273	-8.64875	5.20678e-18	4.30234e-16	6.04198	8.46498	8.17703	7.66631	8.06461	6.60073	6.87318	6.75183	396	207	333	75	80	69	25.283	12.904	22.1062	2.80658	4.63428	3.75926	82.2095	40.25	74.0768	9.18294	14.6654	12.4041
335732	NM_199972	elovl4b	ELOVL fatty acid elongase 4b	protein_coding	NP_956266.1	ZDB-GENE-030131-7672	.	-5.52673	824.019	0.272069	-9.06544	1.24104e-19	1.20797e-17	7.98261	10.4462	10.276	9.60612	10.0068	8.41943	8.71146	8.64969	1703	777	1223	282	293	284	31.1081	13.8651	23.5616	3.10272	4.904	4.45064	101.15	43.2477	78.954	10.1519	15.5189	14.6854
335789	NM_001013262	crygmx	crystallin, gamma MX	protein_coding	NP_001013280.1	ZDB-GENE-030131-7732	.	-15.4819	677.058	0.263571	-14.996	7.79494e-51	8.13898e-48	6.36207	10.3127	9.63551	9.88738	9.47085	7.48795	7.41077	7.74664	1111	1342	891	107	58	121	60.2174	71.0929	50.9455	3.49562	2.8581	5.5896	195.801	221.752	170.716	11.4374	9.04456	18.4435
335863	NM_199980,XM_021479096	itm2cb	integral membrane protein 2Cb	protein_coding	NP_956274.1;XP_021334771.1	ZDB-GENE-030131-7806	.	-2.13487	437.576	0.220887	-4.95343	7.29185e-07	1.07995e-05	8.12702	9.21818	9.17932	8.7962	8.96521	8.23785	8.43304	8.45763	672	404	501	339	296	324	15.7969	9.32722	12.39	4.99198	6.47879	6.34159	51.3648	29.0933	41.5184	16.3335	20.5024	20.9248
335865	NM_214716	hspa4a	heat shock protein 4a	protein_coding	NP_999881.1	ZDB-GENE-040426-2832	.	2.67472	1601.45	0.189923	7.47347	7.81071e-14	3.96946e-12	11.187	9.76732	9.99524	10.1591	10.1119	10.7184	10.9343	11.0704	700	813	777	2752	2348	2883	9.55427	10.8491	11.1867	22.7111	29.4124	33.8363	31.0664	33.8403	37.486	74.3094	93.0768	111.647
335916	NM_199987	jun	jun proto-oncogene	protein_coding	NP_956281.1	ZDB-GENE-030131-7859	.	3.27429	3010.73	0.21672	7.89582	2.88404e-15	1.77612e-13	12.1714	10.4602	10.7753	11.0615	10.6791	11.7621	11.9963	11.7889	1159	1576	964	6152	5308	4500	27.4088	36.4365	24.0457	87.9487	115.206	91.4739	89.1215	113.652	80.5762	287.762	364.573	301.829
335987	NM_001005394	gypc	glycophorin C (Gerbich blood group)	protein_coding	NP_001005394.1	ZDB-GENE-030131-7930	.	-2.76265	58.6231	0.382914	-3.82867	0.000128837	0.000999158	4.95702	6.42937	6.1047	6.25713	5.67437	5.48836	5.32284	5.50542	86	99	42	51	23	37	2.73962	3.09951	1.41061	0.975375	0.660065	1.01406	8.90805	9.66796	4.72689	3.19137	2.0888	3.34602
336034	NR_120357	si:ch211-285j22.3	si:ch211-285j22.3	lncRNA	.	ZDB-GENE-141216-187	.	-2.4601	36.9563	0.450647	-2.88189	0.003953	0.0176972	4.42257	5.71336	5.43653	4.99829	5.47952	4.83896	5.03227	4.7416	57	24	58	29	30	15	5.28888	2.13169	5.75272	1.60844	2.53955	1.16496	17.1972	6.64913	19.2771	5.26273	8.03651	3.84393
336038	NM_212750	junbb	jun B proto-oncogene b	protein_coding	NP_997915.1	ZDB-GENE-040426-2666	.	3.10995	2099.14	0.185051	8.84565	9.09988e-19	7.94804e-17	11.6335	9.99615	10.3745	10.2845	10.4574	11.1572	11.4899	11.3152	932	772	988	3875	3732	3276	24.8318	20.1164	27.7887	62.3994	91.2343	75.0288	80.7425	62.7469	93.1187	204.167	288.714	247.566
336159	NM_001100066,XM_021474935,XM_021474936	optn	optineurin	protein_coding	NP_001093536.2;XP_021330610.1;XP_021330611.1	ZDB-GENE-030131-8103	.	2.25447	353.368	0.208469	5.62573	1.8473e-08	3.9038e-07	8.93586	7.76156	8.1215	7.97129	8.04762	8.64172	8.87077	8.54508	219	166	188	678	592	430	4.49493	3.19536	4.09162	8.85401	11.0676	7.30754	14.6156	9.96692	13.7109	28.9698	35.0239	24.1121
336211	NM_001159664	zwi	zwilling	protein_coding	NP_001153136.1	ZDB-GENE-030131-8155	.	-3.34329	478.204	0.258783	-6.7287	1.71191e-11	6.26572e-10	7.78517	9.52322	9.17076	9.42477	8.87627	8.02281	8.31003	8.26809	664	820	451	248	251	251	7.12341	8.60099	5.10505	1.60274	2.46538	2.31136	23.1623	26.8281	17.1068	5.24406	7.80179	7.62661
336290	NM_001045375	rnasekb	ribonuclease, RNase K b	protein_coding	NP_001038840.1	ZDB-GENE-060825-160	.	-2.1003	613.785	0.256714	-4.17039	3.04082e-05	0.000290681	8.63057	9.69912	9.61817	9.13481	9.60607	8.66155	8.94036	8.9695	890	475	835	443	431	474	41.5157	21.641	41.1067	12.4664	18.4372	18.9889	134.991	67.5023	137.747	40.7892	58.3451	62.656
336303	NM_200008	ppdpfb	pancreatic progenitor cell differentiation and proliferation factor b	protein_coding	NP_956302.1	ZDB-GENE-030131-8247	.	3.41908	4458.67	0.206434	8.59164	8.57403e-18	6.935e-16	12.7523	10.9785	11.4823	11.4045	11.2552	12.2612	12.6514	12.3238	2092	1768	1467	8501	8659	6467	120.802	99.8185	89.371	296.634	458.764	320.944	392.796	311.353	299.479	970.568	1451.78	1058.99
336346	NM_213122	sox4a	SRY (sex determining region Y)-box 4a	protein_coding	NP_998287.1	ZDB-GENE-030131-8290	.	2.23377	8207.34	0.202034	5.73903	9.52192e-09	2.13602e-07	13.469	12.3094	12.724	12.3648	12.5599	13.1285	13.3798	13.2151	5671	3365	4402	14668	12965	11473	76.5408	44.3888	62.6808	119.605	160.5	133.047	248.878	138.457	210.041	391.339	507.908	439.004
336380	XM_002663518,XM_005155644	si:dkey-242g16.2	si:dkey-242g16.2, transcript variant X1	protein_coding	XP_002663564.1;XP_005155701.1	ZDB-GENE-030131-8324	.	-4.21671	93.1282	0.312164	-6.65072	2.91672e-11	1.02603e-09	5.17295	7.23056	6.78013	6.63894	6.88791	5.64137	5.87249	5.99644	138	108	150	34	37	50	3.40197	2.60626	3.90764	0.507007	0.82216	1.04678	11.0617	8.12942	13.0943	1.65889	2.60175	3.45398
336478	XM_021466906,XM_021466907,XM_021466908	si:dkey-92i15.4	si:dkey-92i15.4, transcript variant X1	protein_coding	XP_021322581.1;XP_021322582.1;XP_021322583.1	ZDB-GENE-030131-8422	.	2.73034	129.535	0.239447	6.05178	1.43256e-09	3.79553e-08	7.56636	6.11955	6.50403	6.51389	6.619	7.33262	7.29413	7.11358	59	56	68	308	198	167	0.546464	0.505098	0.668033	1.73199	1.69246	1.36682	1.77687	1.57549	2.23855	5.66696	5.35584	4.50999
336526	NM_198876	b3gnt5a	UDP-GlcNAc:betaGal beta-1,3-N-acetylglucosaminyltransferase 5a	protein_coding	NP_942577.1	ZDB-GENE-030131-8470	.	-2.18751	412.564	0.286807	-3.93746	8.23479e-05	0.00068761	8.01673	9.14502	8.72971	9.26058	8.58621	8.18023	8.39398	8.21827	423	722	338	339	302	253	7.99385	13.3474	6.72941	3.86551	5.23003	4.10481	25.9926	41.633	22.55	12.6477	16.5506	13.5443
336623	NM_001089344,XM_009301921	gsnb	gelsolin b	protein_coding	NP_001082813.1;XP_009300196.1	ZDB-GENE-030131-8567	.	2.58057	143.083	0.343249	3.98455	6.76073e-05	0.000580671	7.68711	6.32333	6.48507	6.61398	6.92315	7.63399	7.37636	7.0202	51	60	99	413	205	137	0.812135	0.918667	1.66203	4.41883	3.22739	1.85819	2.64072	2.86549	5.5694	14.4581	10.2132	6.13131
336770	NM_201315	abcf2a	ATP-binding cassette, sub-family F (GCN20), member 2a	protein_coding	NP_958472.2	ZDB-GENE-030131-8714	.	-2.62884	875.356	0.191571	-7.27888	3.36611e-13	1.59429e-11	8.91328	10.309	9.9831	10.1584	9.96608	9.29237	9.06969	9.33143	1087	1235	1014	765	378	571	19.7656	21.9611	19.4473	8.40239	6.29275	8.91356	64.2693	68.5008	65.1672	27.4921	19.9136	29.4113
337230	XM_017353962	gars	glycyl-tRNA synthetase	protein_coding	XP_017209451.1	ZDB-GENE-030131-9174	.	2.20548	1728.05	0.153412	7.43812	1.02125e-13	5.14455e-12	11.2154	10.0746	10.2695	10.4362	10.2782	11.0418	10.9996	10.9473	909	1052	874	3684	2358	2356	15.2847	17.2798	15.4946	37.4255	36.3681	34.0376	49.6994	53.899	51.9217	122.454	115.088	112.311
337315	NM_212774	fgb	fibrinogen beta chain	protein_coding	NP_997939.1	ZDB-GENE-030131-9261	.	4.45021	499.538	0.356439	6.04275	1.51511e-09	3.99581e-08	9.67231	7.51681	8.17497	7.81066	8.1033	8.65181	9.67675	9.16999	203	108	174	610	1269	786	5.16519	2.66801	4.6703	9.39136	29.6645	17.2018	16.795	8.32201	15.65	30.7279	93.8745	56.7593
337325	NM_001128670	pdzk1	PDZ domain containing 1	protein_coding	NP_001122142.2	ZDB-GENE-031222-1	.	-4.41568	149.834	0.298269	-7.18357	6.79143e-13	3.07704e-11	5.78725	7.93335	7.57236	7.22	7.62628	6.44707	6.23076	6.58267	246	151	249	85	36	75	4.67309	2.80262	4.98249	0.971286	0.611591	1.21602	15.1949	8.74188	16.6961	3.17799	1.9354	4.01242
337495	XM_002664905,XM_009292363,XM_009292366	rnf41l	ring finger protein 41, like, transcript variant X3	protein_coding	XP_002664951.1;XP_009290638.1;XP_009290641.1	ZDB-GENE-030131-9441	.	-2.71681	249.616	0.233384	-6.17829	6.48005e-10	1.83054e-08	7.07219	8.51042	8.2657	7.96785	8.35745	7.36169	7.53879	7.41331	355	233	375	177	153	135	5.54845	3.5663	6.12262	1.63179	1.93716	1.8507	18.0412	11.1239	20.5167	5.33912	6.13023	6.10659
337514	NM_001351837,NM_212779,XM_021479113	mpx	myeloid-specific peroxidase	protein_coding	NP_001338766.1;NP_997944.2;XP_021334788.1	ZDB-GENE-030131-9460	.	2.73299	83.8572	0.447286	3.24285	0.00118339	0.00650481	6.93903	5.49221	5.88157	6.23186	5.53535	6.79422	6.60038	6.25896	38	65	15	238	126	83	0.50702	0.85163	0.209342	1.94998	1.58469	0.962641	1.64861	2.65639	0.701497	6.38021	5.01482	3.17635
337596	NM_200071	rhbg	Rh family, B glycoprotein (gene/pseudogene)	protein_coding	NP_956365.2	ZDB-GENE-030131-9542	.	-2.50101	597.896	0.225546	-5.8636	4.52946e-09	1.08949e-07	8.41617	9.73841	9.5534	9.19741	9.62291	8.7363	8.82488	8.59733	852	530	875	513	386	300	9.49316	5.76864	10.2784	3.4474	3.93871	2.87073	30.8677	17.9935	34.4425	11.2797	12.4642	9.47233
337597	NM_200072,XM_021481352	lgals9l1	lectin, galactoside-binding, soluble, 9 (galectin 9)-like 1	protein_coding	NP_956366.1;XP_021337027.1	ZDB-GENE-030131-9543	.	3.21614	59.1554	0.375333	4.49023	7.11472e-06	8.20031e-05	6.49662	4.80802	5.51527	5.53366	5.15107	6.02913	6.18234	6.04317	32	31	11	122	102	89	0.638117	0.591565	0.210838	1.4633	1.85328	1.5054	2.07488	1.8452	0.70651	4.78783	5.86477	4.96726
337696	NM_194379	cbr1l	carbonyl reductase 1-like	protein_coding	NP_919360.1	ZDB-GENE-030131-9642	.	2.07406	177.59	0.221191	4.75815	1.95379e-06	2.60479e-05	7.90443	6.85285	7.20201	7.16107	7.02593	7.75063	7.7206	7.53887	117	103	85	387	251	212	3.17746	2.74975	2.42959	6.38721	6.30106	4.97088	10.3317	8.57698	8.14147	20.8985	19.94	16.402
337795	NM_001077794	dact2	dishevelled-binding antagonist of beta-catenin 2	protein_coding	NP_001071262.2	ZDB-GENE-030131-9975	.	2.13495	157.298	0.264008	4.14458	3.40443e-05	0.000321427	7.74246	6.6503	6.91566	7.1296	6.74512	7.58247	7.53759	7.35629	88	113	63	350	223	188	1.26229	1.57335	0.944629	3.03531	2.93294	2.31057	4.10442	4.90756	3.16541	9.93133	9.28138	7.624
338155	NM_200075	hspbp1	HSPA (heat shock 70kDa) binding protein, cytoplasmic cochaperone 1	protein_coding	NP_956369.1	ZDB-GENE-030219-55	.	3.37586	232.986	0.226432	7.7518	9.05997e-15	5.1514e-13	8.49011	6.73343	7.21511	7.3413	7.0758	8.00325	8.20026	8.19934	97	110	73	452	382	404	2.36824	2.61418	1.87651	6.68086	8.57729	8.49873	7.70052	8.15412	6.28812	21.8593	27.1432	28.0426
338183	NM_200076	mars	methionyl-tRNA synthetase	protein_coding	NP_956370.1	ZDB-GENE-030219-83	.	2.01408	1213.51	0.188413	5.36123	8.26583e-08	1.52021e-06	10.6631	9.65375	9.79455	10.0286	9.79168	10.5897	10.4255	10.364	660	831	625	2749	1535	1516	9.18008	11.3024	9.17494	23.1115	19.5922	18.1216	29.8497	35.2542	30.7448	75.6192	62.0001	59.7943
338304	NM_200079	ppdpfa	pancreatic progenitor cell differentiation and proliferation factor a	protein_coding	NP_956373.1	ZDB-GENE-030219-204	.	-2.06861	382.901	0.211291	-4.96311	6.93731e-07	1.03478e-05	7.96571	9.01071	8.79347	8.89225	8.68233	8.06915	8.3771	8.16422	471	494	393	303	307	245	23.9894	24.6051	21.1312	9.31524	14.3244	10.7324	78.0033	76.7478	70.8097	30.4789	45.3301	35.413
352912	NM_178437	krt18	keratin 18	protein_coding	NP_848524.1	ZDB-GENE-030411-6	.	2.51873	3118.3	0.225376	5.91322	3.35484e-09	8.27756e-08	12.1242	10.7916	10.9979	11.3343	10.8621	11.8783	11.9257	11.7982	1444	2065	1143	6651	4697	4326	36.4467	50.9598	30.4283	101.467	108.787	93.8525	118.509	158.953	101.964	331.993	344.261	309.678
352916	NM_178288	msrb1a	methionine sulfoxide reductase B1a	protein_coding	NP_840073.2	ZDB-GENE-030411-3	.	-2.05367	99.1845	0.374814	-2.76993	0.00560684	0.0235413	6.02614	7.05744	6.65283	7.11062	6.47504	6.0916	6.52456	6.20971	102	172	75	68	92	59	1.35715	2.23697	1.04579	0.541595	1.12427	0.675053	4.41289	6.97753	3.5044	1.77207	3.55778	2.22742
352918	NM_178289	opn4.1	opsin 4.1	protein_coding	NP_840074.2	ZDB-GENE-030314-2	.	-3.4433	593.672	0.221935	-8.03744	9.1736e-16	5.93597e-14	8.06364	9.84518	9.64504	9.25685	9.57082	8.37935	8.47165	8.62861	979	595	859	333	254	335	13.4941	8.01755	12.4826	2.76834	3.20891	3.96018	43.8771	25.0082	41.8287	9.05783	10.1547	13.0671
352923	NM_178294	sep15	selenoprotein 15	protein_coding	NP_840079.1	ZDB-GENE-030327-1	.	-2.74788	181.652	0.242395	-6.01629	1.7846e-09	4.62687e-08	6.59374	8.05918	7.6654	7.86006	7.69907	7.12115	7.01578	6.81141	221	261	219	174	99	75	10.0503	11.5972	10.4996	4.77478	4.12879	2.90682	32.6792	36.1737	35.1837	15.6228	13.0657	9.59139
352934	NM_178299,XM_005165120,XM_005165121,XM_021476023	npas2	neuronal PAS domain protein 2	protein_coding	NP_840084.1;XP_005165177.1;XP_005165178.1;XP_021331698.1	ZDB-GENE-030408-3	.	-2.13083	942.955	0.195386	-5.58595	2.32426e-08	4.80997e-07	9.23534	10.3255	10.1979	9.90788	10.1961	9.39424	9.59638	9.43744	1293	870	1227	795	691	597	14.1315	9.61687	12.1695	5.341	6.87325	5.59839	45.9496	29.9968	40.7796	17.4754	21.7507	18.4725
353151	NM_180970,XM_005159179	mc1r	melanocortin 1 receptor	protein_coding	NP_851301.1;XP_005159236.1	ZDB-GENE-030502-1	.	-3.40765	27.9488	0.420963	-4.20175	2.64865e-05	0.000257806	3.65681	5.43579	4.90566	4.8448	5.06085	4.44818	4.41368	4.39571	37	31	46	21	12	12	0.995307	0.849625	1.27107	0.368869	0.461406	0.399521	3.23631	2.65014	4.25929	1.20692	1.46013	1.31827
353221	NM_181438	pomca	proopiomelanocortin a	protein_coding	NP_852103.1	ZDB-GENE-030513-2	.	3.21723	46.63	0.352323	4.78487	1.711e-06	2.3134e-05	6.15284	4.46647	5.03637	5.16199	5.15511	5.64463	5.69001	5.85597	16	21	21	91	66	89	0.543818	0.730688	0.76945	1.97494	2.15895	2.76041	1.76826	2.27915	2.5784	6.46188	6.83207	9.1083
353248	NM_181499	tnnt2c	troponin T2c, cardiac	protein_coding	NP_852476.1	ZDB-GENE-030520-1	.	2.90644	91.3096	0.396625	3.88087	0.000104083	0.000836559	7.08536	5.54899	5.78596	6.3701	5.77739	6.68841	6.64898	6.80961	26	72	24	192	123	160	0.59347	1.62455	0.583348	2.69454	2.61781	3.17746	1.92971	5.06729	1.95477	8.81636	8.28416	10.4844
360151	NM_182891	opn1mw2	opsin 1 (cone pigments), medium-wave-sensitive, 2	protein_coding	NP_878311.1	ZDB-GENE-030728-5	.	-4.95771	63.9521	0.417491	-5.53227	3.16116e-08	6.32536e-07	4.42761	6.73314	6.46128	5.6637	6.27751	5.21967	5.27448	5.2663	137	42	104	30	22	23	3.63783	1.09067	2.91169	0.480206	0.5383	0.526965	11.8287	3.40199	9.75695	1.5712	1.70347	1.73879
368217	NM_200082	calm1b	calmodulin 1b	protein_coding	NP_956376.1	ZDB-GENE-030804-2	.	-2.22673	2378.13	0.178814	-6.45878	1.05548e-10	3.37684e-09	10.5261	11.6802	11.5342	11.496	11.3342	10.6284	10.8774	10.821	3256	2922	2478	1783	1645	1624	100.295	87.9619	80.5137	33.1649	46.4662	42.9724	326.115	274.37	269.798	108.513	147.044	141.793
368235	NM_201316,XM_005159598,XM_021468004	yars	tyrosyl-tRNA synthetase	protein_coding	NP_958473.1;XP_005159655.1;XP_021323679.1	ZDB-GENE-030425-2	.	2.3549	663.255	0.159601	7.74218	9.77263e-15	5.51565e-13	9.86272	8.62737	8.94581	8.97583	8.83032	9.66331	9.63761	9.56295	374	364	304	1437	937	912	7.50924	7.14306	6.44333	17.4493	17.281	15.7721	24.4168	22.2805	21.5913	57.0929	54.6864	52.0418
368243	NM_001008615	hspb1	heat shock protein, alpha-crystallin-related, 1	protein_coding	NP_001008615.2	ZDB-GENE-030326-4	.	9.78356	196.692	0.270293	12.1733	4.31236e-34	1.19348e-31	8.47956	5.18737	6.34892	6.42174	6.1615	7.74287	7.97432	7.97595	36	39	21	439	382	405	1.64307	1.75222	0.995143	12.3544	16.3317	16.2312	5.34255	5.46552	3.33468	40.4229	51.6824	53.5568
368256	NM_183345,XM_005158330	paqr7b	progestin and adipoQ receptor family member VII, b	protein_coding	NP_899188.1;XP_005158387.1	ZDB-GENE-030728-2	.	-2.19499	1984.85	0.228372	-4.96653	6.81615e-07	1.01936e-05	10.2796	11.4129	11.3849	10.9834	11.1606	10.2998	10.6553	10.584	3082	1846	2292	1365	1447	1403	19.778	11.1642	14.9657	5.10339	8.81659	7.45887	64.3096	34.8231	50.1494	16.6979	27.9004	24.6114
368367	XM_021476561	hsd20b2	hydroxysteroid (20-beta) dehydrogenase 2	protein_coding	XP_021332236.1	ZDB-GENE-030804-21	.	-4.09729	142.808	0.363798	-5.59285	2.23369e-08	4.63926e-07	5.81557	7.84106	7.15822	7.72707	7.21337	6.12517	6.37737	6.62874	156	285	159	49	53	86	2.99954	5.36559	3.23493	0.570926	0.92967	1.41867	9.75321	16.7363	10.8401	1.86803	2.94198	4.68106
368410	NM_001007160	pde6a	phosphodiesterase 6A, cGMP-specific, rod, alpha	protein_coding	NP_001007161.1	ZDB-GENE-030616-42	.	-2.94727	574.205	0.258827	-6.02479	1.6933e-09	4.4201e-08	8.18493	9.74383	9.61989	9.00703	9.57016	8.54214	8.60841	8.49818	960	447	865	425	311	283	13.7899	6.28025	13.1069	3.68861	4.09694	3.48597	44.8389	19.5893	43.9208	12.0689	12.9649	11.5024
368421	NM_001007199	gpr161	G protein-coupled receptor 161	protein_coding	NP_001007200.2	ZDB-GENE-030616-58	.	-2.61068	105.795	0.272685	-5.077	3.8344e-07	6.08288e-06	5.87534	7.25632	7.00104	7.06356	6.69936	6.22454	6.26436	6.35084	152	154	97	79	56	69	2.83759	2.80067	1.8991	0.887822	0.959906	1.094	9.22664	8.73582	6.36381	2.9049	3.03766	3.60979
368429	XM_003199914,XM_009291181,XM_009291182,XM_009291183	si:rp71-46j2.7	si:rp71-46j2.7, transcript variant X2	protein_coding	XP_003199962.2;XP_009289456.1;XP_009289457.1;XP_009289458.1	ZDB-GENE-160113-120	.	4.0322	814.114	0.17995	11.1785	5.19781e-29	1.07567e-26	10.3495	8.3378	8.75236	8.92817	8.83052	9.8696	10.103	9.95751	260	313	277	1702	1471	1332	3.6464	4.27061	4.24402	14.1959	19.121	16.3211	11.8565	13.3208	14.2215	46.4482	60.509	53.8535
368481	NM_200091,XM_005167878,XM_009304879,XM_021478619,XM_021478620,XM_021478621,XM_021478622,XM_021478623,XR_002459471,XR_002459472	stat1b	signal transducer and activator of transcription 1b	protein_coding	NP_956385.2;XP_005167935.1;XP_009303154.1;XP_021334294.1;XP_021334295.1;XP_021334296.1;XP_021334297.1;XP_021334298.1	ZDB-GENE-030616-23	.	7.37667	49.3616	0.388513	7.42053	1.16656e-13	5.8637e-12	6.44157	3.56142	4.83756	4.95629	4.77641	5.85361	5.88945	5.78217	10	14	7	129	92	84	0.098125	0.138055	0.071656	1.14015	1.11832	1.0822	0.319061	0.43062	0.240116	3.73049	3.53895	3.57084
368491	XM_021469919,XM_021469920	si:rp71-79p20.2	si:rp71-79p20.2, transcript variant X2	protein_coding	XP_021325594.1;XP_021325595.1	ZDB-GENE-030616-83	.	-2.66158	647.544	0.184758	-7.64399	2.10585e-14	1.14358e-12	8.46783	9.8781	9.70042	9.51711	9.58543	8.6978	8.76215	8.93146	956	729	800	453	331	440	4.89061	3.62676	4.29838	1.39398	1.56031	1.9216	15.9022	11.3125	14.4037	4.56103	4.93765	6.34054
368498	NM_001004506	fkbp7	FK506 binding protein 7	protein_coding	NP_001004506.1	ZDB-GENE-030616-182	.	-2.32083	42.6667	0.470732	-2.58032	0.00987085	0.0368508	4.68412	5.89787	5.60009	5.79626	5.0382	5.0724	5.15384	4.99574	61	76	20	38	30	22	3.07049	3.74335	1.06116	1.15093	1.38265	0.938864	9.98392	11.6762	3.55591	3.76576	4.37546	3.09789
368621	NM_001004512	si:busm1-57f23.1	si:busm1-57f23.1	protein_coding	NP_001004512.2	ZDB-GENE-030616-512	.	-2.84344	128.612	0.287054	-5.25211	1.5037e-07	2.60298e-06	6.06921	7.57045	7.30147	7.06183	7.31128	6.42249	6.70407	6.32118	189	131	182	88	92	51	8.9946	6.08387	9.13578	2.51476	4.00805	2.07498	29.2466	18.9767	30.6136	8.22813	12.6836	6.84664
368632	NM_200093	ormdl1	ORMDL sphingolipid biosynthesis regulator 1	protein_coding	NP_956387.1	ZDB-GENE-030616-529	.	-2.00548	146.725	0.250589	-4.00633	6.16685e-05	0.000535316	6.61276	7.61163	7.54416	7.17517	7.36788	6.79808	6.91149	6.9346	222	128	168	126	101	111	5.97206	3.34779	4.75383	2.04886	2.49085	2.55309	19.4186	10.4424	15.9299	6.70374	7.88238	8.42423
368636	NM_001040046	ankar	ankyrin and armadillo repeat containing	protein_coding	NP_001035135.2	ZDB-GENE-030616-533	.	2.35379	53.0643	0.346025	3.56907	0.000358248	0.00239712	6.21748	4.98713	5.26242	5.52514	5.43957	5.9503	5.98566	5.73861	20	34	29	118	84	61	0.197538	0.333206	0.312906	0.725894	0.786142	0.531753	0.642308	1.03933	1.04853	2.37508	2.48778	1.75458
368645	NM_001003574,NM_001004514	tmem267	transmembrane protein 267	protein_coding	NP_001003574.1;NP_001004514.1	ZDB-GENE-030616-546	.	-2.06117	217.229	0.209861	-4.97217	6.62092e-07	9.9275e-06	7.14778	8.19304	8.11536	7.85768	7.90544	7.46887	7.41282	7.35321	319	219	236	227	140	136	9.92254	6.68852	7.76786	4.40481	4.05694	3.67167	32.2638	20.8627	26.0298	14.4123	12.8383	12.1151
368657	NM_001003458,XM_005156784	calhm2	calcium homeostasis modulator 2	protein_coding	NP_001003458.1;XP_005156841.1	ZDB-GENE-030616-561	.	-3.56725	48.359	0.410042	-4.47469	7.65209e-06	8.74073e-05	4.40469	6.23911	5.65713	6.05142	5.49131	5.03415	4.98342	5.18799	59	96	43	29	16	29	0.642977	1.11872	0.645038	0.188947	0.212819	0.270025	2.09069	3.48951	2.1615	0.618222	0.673473	0.890979
368662	NM_207641	ptf1a	pancreas specific transcription factor, 1a	protein_coding	NP_997524.1	ZDB-GENE-030616-579	.	2.54295	38.1628	0.450941	2.98598	0.00282672	0.0134103	5.77799	4.42318	5.05881	4.76287	4.9332	5.21165	5.2423	5.66191	27	11	19	59	42	86	0.990945	0.381415	0.711415	1.29614	1.40956	2.71464	3.22213	1.1897	2.38392	4.24089	4.4606	8.95729
368671	NM_001007120	homeza	homeobox and leucine zipper encoding a	protein_coding	NP_001007121.2	ZDB-GENE-030616-592	.	4.17902	395.959	0.230529	8.94968	3.56505e-19	3.23687e-17	9.32	7.25524	7.75422	7.7981	7.84532	8.64886	9.1134	8.97184	130	130	142	686	773	702	1.92116	1.87594	2.21055	6.13471	10.4913	8.93473	6.24679	5.85142	7.40748	20.0724	33.2003	29.4812
368722	NM_001007760	pdzk1ip1	PDZK1 interacting protein 1	protein_coding	NP_001007761.1	ZDB-GENE-030616-128	.	-3.10295	52.8147	0.32351	-5.04973	4.42428e-07	6.90422e-06	4.69528	6.31691	5.91837	5.95367	5.8422	5.20706	5.39551	5.21282	74	73	63	33	33	23	0.812328	0.78441	0.734384	0.216116	0.324698	0.212612	2.64134	2.44672	2.46089	0.707118	1.02752	0.701538
368824	NM_001002603,XM_005165699	ccdc65	coiled-coil domain containing 65	protein_coding	NP_001002603.1;XP_005165756.1	ZDB-GENE-030616-358	.	3.3509	246.276	0.193052	9.03669	1.61491e-19	1.55698e-17	8.56684	6.82459	7.24885	7.37439	7.28144	8.2899	8.17641	8.19694	95	108	95	603	356	386	2.03132	2.52654	2.31646	8.21768	6.99548	8.83724	6.60497	7.88075	7.76237	26.8877	22.1375	29.1595
368885	NM_001002513,XM_005156786	slc1a4	solute carrier family 1 (glutamate/neutral amino acid transporter), member 4	protein_coding	NP_001002513.2;XP_005156843.1	ZDB-GENE-030616-566	.	3.20771	727.277	0.200024	8.4067	4.21711e-17	3.12488e-15	10.1152	8.43228	8.98528	8.74318	8.77397	9.67815	9.9375	9.7569	384	257	273	1433	1279	1112	5.77504	3.77869	4.32329	13.0244	17.6511	14.3781	18.7779	11.7864	14.4872	42.6152	55.8577	47.4424
368917	NM_200637	adam8a	ADAM metallopeptidase domain 8a	protein_coding	NP_956931.1	ZDB-GENE-030616-622	.	2.39678	288.043	0.183119	6.88679	5.70641e-12	2.27968e-10	8.66715	7.40578	7.68744	7.81169	7.67918	8.35905	8.40106	8.46702	146	163	137	564	398	455	1.96457	2.14899	1.95044	4.61059	4.93374	5.29208	6.38793	6.70311	6.53585	15.0856	15.613	17.4618
368924	NM_213149,XM_005166021,XM_009302537,XM_021476795	fkbp5	FK506 binding protein 5	protein_coding	NP_998314.1;XP_005166078.1;XP_009300812.1;XP_021332470.1	ZDB-GENE-030616-630	.	-11.5801	2055.31	0.319252	-11.0683	1.7878e-28	3.4803e-26	8.35174	11.8857	11.0309	11.7286	10.9477	9.27984	9.06583	9.47196	2632	4975	2293	478	217	457	44.1848	81.9405	40.7355	4.86914	3.33329	6.57369	143.67	255.588	136.503	15.9315	10.5483	21.6907
373081	NM_201325,XM_005163803	mvp	major vault protein	protein_coding	NP_958482.1;XP_005163860.1	ZDB-GENE-030826-33	.	6.80414	2399.57	0.193279	14.3131	1.81342e-46	1.38853e-43	12.0307	9.26474	9.8354	10.1361	9.91254	11.598	11.5854	11.4907	456	668	489	6422	4252	4080	6.36235	9.20286	7.23196	55.0652	54.8362	49.5312	20.6876	28.7054	24.234	180.17	173.531	163.434
373089	NM_001328340,XM_005170442	tjp3	tight junction protein 3	protein_coding	NP_001315269.1;XP_005170499.1	ZDB-GENE-030828-10	.	2.69283	355.364	0.201685	7.0859	1.38142e-12	6.02137e-11	9.01781	7.58772	7.94887	7.88989	8.00086	8.69088	8.89522	8.58735	176	151	180	728	616	459	1.81023	1.44879	1.87202	4.33864	5.55756	3.88729	5.8861	4.51905	6.27305	14.1958	17.5871	12.8266
373099	NM_194393	guca1c	guanylate cyclase activator 1C	protein_coding	NP_919374.1	ZDB-GENE-030829-1	.	-9.38393	511.369	0.27476	-11.7564	6.5465e-32	1.67089e-29	6.62286	9.85203	9.40505	8.90899	9.48211	7.54277	7.67924	7.38509	947	522	975	147	122	76	22.9972	12.3873	24.9772	2.14752	2.70208	1.58262	74.7771	38.6383	83.6975	7.02655	8.55084	5.22204
373102	NM_194394	mcl1b	MCL1, BCL2 family apoptosis regulator b	protein_coding	NP_919375.2	ZDB-GENE-030825-1	.	3.35683	1829.42	0.200294	8.72271	2.71629e-18	2.28557e-16	11.461	9.7139	10.0326	10.2985	10.0085	11.0534	11.2728	11.0736	678	904	623	3790	3221	2753	29.3885	38.2985	28.4736	99.2718	128.082	102.549	95.559	119.46	95.4137	324.811	405.319	338.373
373115	XM_002666751,XM_021470744	dnaja	DnaJ (Hsp40) homolog, subfamily A member, transcript variant X1	protein_coding	XP_002666797.3;XP_021326419.1	ZDB-GENE-030828-8	.	3.76591	466.885	0.290769	6.5791	4.73303e-11	1.61309e-09	9.52725	7.61388	8.01626	8.33973	7.85308	8.85779	9.17859	9.36756	160	237	117	777	749	973	3.73959	5.23155	2.76105	10.6417	15.477	18.8773	12.1595	16.3182	9.25217	34.819	48.9776	62.2877
373121	NM_194402	mknk2b	MAP kinase interacting serine/threonine kinase 2b	protein_coding	NP_919383.1	ZDB-GENE-030829-2	.	5.92319	8627.24	0.181021	14.1772	1.268e-45	8.56682e-43	13.8496	11.2833	11.8575	12.01	11.8645	13.3674	13.5787	13.2528	2098	2439	2015	20857	17407	13127	43.6154	49.5665	44.1862	261.975	331.944	234.477	141.818	154.607	148.066	857.165	1050.45	773.684
373132	NM_001007285,XM_005173892,XM_005173893,XM_005173894,XM_009295689,XM_009295691	p4ha2	procollagen-proline, 2-oxoglutarate 4-dioxygenase (proline 4-hydroxylase), alpha polypeptide 2	protein_coding	NP_001007286.1;XP_005173949.1;XP_005173950.1;XP_005173951.1;XP_009293964.1;XP_009293966.1	ZDB-GENE-030827-1	.	2.98902	784.48	0.185464	8.51742	1.63142e-17	1.27035e-15	10.1989	8.62045	8.87963	9.13436	8.96532	9.99675	9.83567	9.85882	304	403	326	1927	1083	1177	5.32977	6.96016	6.06405	20.6181	17.7856	18.6533	17.3301	21.71	20.3204	67.461	56.2832	61.5489
378437	NM_194417	sepw2a	selenoprotein W, 2a	protein_coding	NP_919398.1	ZDB-GENE-030428-1	.	-2.01333	1336.46	0.262846	-3.84097	0.000122548	0.000955872	9.79376	10.802	10.7393	10.5622	10.4642	9.67265	10.2713	9.98522	1912	1470	1336	840	1215	905	31.2173	23.4444	23.0073	8.27854	18.1862	12.6925	101.505	73.1274	77.0965	27.0869	57.551	41.8803
378438	NM_194418	sepw2b	selenoprotein W, 2b	protein_coding	NP_919399.3	ZDB-GENE-030428-2	.	3.1932	98.3111	0.369137	4.53762	5.68932e-06	6.72617e-05	7.22523	5.55444	6.05598	5.8505	6.25739	7.14631	6.7175	6.56233	42	25	57	319	127	109	1.64097	0.941664	2.38252	7.6302	4.59139	3.70716	5.33574	2.93723	7.98372	24.9655	14.5296	12.2322
378440	NM_198069,XM_005167928	rdh1	retinol dehydrogenase 1	protein_coding	NP_932335.1;XP_005167985.1	ZDB-GENE-030912-15	.	-2.00925	22.9869	0.470124	-2.14126	0.0322533	0.0921848	3.92305	4.94509	4.51687	4.48563	4.7916	4.40107	4.28358	4.28684	23	20	38	28	13	14	0.87471	0.665669	1.39995	0.590026	0.432365	0.437867	2.84418	2.07635	4.69116	1.93053	1.36824	1.4448
378444	NM_194420	gjd2b	gap junction protein delta 2b	protein_coding	NP_919401.1	ZDB-GENE-030911-1	.	-2.39329	183.316	0.321762	-3.91283	9.1222e-05	0.000750523	6.75754	8.01364	7.89949	7.28198	7.88086	7.00887	7.25249	6.91804	290	125	270	146	139	89	13.9074	5.87563	13.6835	4.2174	6.09017	3.66607	45.2208	18.3272	45.8528	13.7991	19.2726	12.0966
378721	NM_213475,XM_005163999,XM_005164001,XM_021469768	gtpbp1	GTP binding protein 1	protein_coding	NP_998640.2;XP_005164056.1;XP_005164058.1;XP_021325443.1	ZDB-GENE-030909-12	.	3.37466	2153.78	0.179216	9.79122	1.22803e-22	1.55852e-20	11.6982	9.94351	10.3414	10.4221	10.2933	11.3956	11.5176	11.1887	884	921	787	5004	3824	2835	12.32	12.9108	11.2431	43.0119	49.7408	34.7926	40.0594	40.2712	37.675	140.732	157.406	114.802
378723	NM_213118	sox2	SRY (sex determining region Y)-box 2	protein_coding	NP_998283.1	ZDB-GENE-030909-1	.	2.04573	2141.9	0.167698	6.15759	7.38583e-10	2.07408e-08	11.4906	10.4578	10.7174	10.5284	10.7928	11.2591	11.3112	11.3017	1336	980	1395	4094	2910	3050	28.1767	20.2031	31.0467	52.1801	56.3029	55.2861	91.6186	63.0172	104.036	170.73	178.173	182.423
378848	NM_213058	hspa5	heat shock protein 5	protein_coding	NP_998223.1	ZDB-GENE-031001-11	.	4.1934	3716.25	0.136833	15.1142	1.30461e-51	1.57727e-48	12.5511	10.4828	10.9933	10.9102	11.0267	12.1551	12.2236	12.1725	1334	1112	1327	8578	6188	6208	25.0776	20.4381	26.3321	97.4694	106.756	100.313	81.5416	63.7504	88.2377	318.914	337.835	330.996
378966	NM_001030071	ncf1	neutrophil cytosolic factor 1	protein_coding	NP_001025242.1	ZDB-GENE-031006-6	.	3.00207	31.2695	0.419691	3.77886	0.000157545	0.00118888	5.55319	3.96204	4.60015	4.6229	4.66297	5.03502	5.28902	5.01875	13	13	15	59	61	41	0.252759	0.25123	0.325923	0.734548	1.15156	0.71918	0.821863	0.783634	1.09215	2.4034	3.64416	2.37302
378968	NM_201498	abat	4-aminobutyrate aminotransferase	protein_coding	NP_958906.2	ZDB-GENE-031006-4	.	2.40497	2401.84	0.180346	7.01995	2.21953e-12	9.40973e-11	11.7284	10.462	10.8321	10.6693	10.7274	11.3588	11.6566	11.4213	1438	1091	1196	4337	4037	3304	28.0781	20.8158	24.6319	51.1824	72.333	55.4508	91.2978	64.9285	82.5406	167.466	228.9	182.967
378986	NM_001194989	fga	fibrinogen alpha chain	protein_coding	NP_001181918.1	ZDB-GENE-031010-21	.	3.01566	479.01	0.287565	5.53779	3.06315e-08	6.1453e-07	9.49125	7.89675	8.48068	8.09683	8.21446	8.82446	9.45303	9.14053	287	156	189	712	969	729	5.36758	2.84979	3.72369	8.04966	16.6434	11.7203	17.4531	8.88903	12.4779	26.338	52.6688	38.6725
386590	NM_198210	hsp90b1	heat shock protein 90, beta (grp94), member 1	protein_coding	NP_937853.1	ZDB-GENE-031002-1	.	2.05058	2119.48	0.145431	7.1239	1.04918e-12	4.67975e-11	11.4765	10.4403	10.6678	10.6341	10.7079	11.2274	11.2203	11.3765	1264	1133	1264	3973	2643	3331	20.4544	17.9099	21.5652	38.8402	39.2276	46.3064	66.5089	55.8643	72.2639	127.083	124.137	152.794
386613	NM_001291500	pdca	phosducin a	protein_coding	NP_001278429.1	ZDB-GENE-031023-1	.	-9.68309	168.226	0.386296	-8.47917	2.26799e-17	1.75414e-15	4.99497	8.2506	7.96955	7.14439	7.64259	5.8131	6.20095	6.14569	397	147	266	25	41	39	5.87732	2.11954	4.14982	0.22367	0.552693	0.484318	19.1105	6.61124	13.9059	0.731835	1.74902	1.59806
386614	NM_001025464	pdcb	phosducin b	protein_coding	NP_001020635.2	ZDB-GENE-031023-2	.	-3.46496	1216.81	0.305401	-5.87044	4.34647e-09	1.04987e-07	9.09163	10.8827	10.7465	10.2097	10.5825	9.16697	9.79331	9.42929	2157	1123	1723	500	792	520	39.2266	19.9568	33.0498	5.48943	13.1982	8.12157	127.548	62.2491	110.748	17.9611	41.7662	26.7981
386629	NM_198363	tob1a	transducer of ERBB2, 1a	protein_coding	NP_938177.1	ZDB-GENE-031030-4	.	-2.44792	2449.88	0.153512	-8.41339	3.98312e-17	2.98033e-15	10.4731	11.7642	11.5156	11.6184	11.4173	10.6975	10.8185	10.7713	3158	3307	2692	1924	1507	1503	63.4059	64.8977	57.0109	23.3366	27.739	25.9252	206.169	202.428	191.041	76.3559	87.7811	85.5433
386643	NM_198374	pik3ip1	phosphoinositide-3-kinase interacting protein 1	protein_coding	NP_938188.1	ZDB-GENE-031030-14	.	2.15955	1015.11	0.211286	5.257	1.46422e-07	2.54807e-06	10.4387	9.32705	9.58246	9.59927	9.54218	9.95951	10.435	10.2059	592	566	534	1521	1743	1434	12.575	11.7549	11.9682	19.5171	33.9625	26.1821	40.8885	36.6656	40.1048	63.8588	107.476	86.391
386659	NM_198813,XM_009296582,XM_009296583	zhx3	zinc fingers and homeoboxes 3	protein_coding	NP_942108.1;XP_009294857.1;XP_009294858.1	ZDB-GENE-031107-1	.	2.10043	1070.19	0.18344	5.83671	5.32413e-09	1.25824e-07	10.5017	9.4315	9.62413	9.83492	9.53368	10.3426	10.2669	10.2642	592	724	499	2262	1394	1472	6.33793	7.69236	5.60752	14.7426	13.9699	13.6397	20.6082	23.9939	18.7906	48.2369	44.2083	45.0058
386661	NM_198815	scd	stearoyl-CoA desaturase (delta-9-desaturase)	protein_coding	NP_942110.2	ZDB-GENE-031106-3	.	2.66776	70.6485	0.329896	4.29114	1.77755e-05	0.000181961	6.68474	5.26389	5.67252	5.7506	5.77091	6.13831	6.57302	6.24602	31	34	36	114	139	95	0.433423	0.466138	0.53539	0.9869	1.81811	1.16395	1.40931	1.45397	1.79407	3.22907	5.75347	3.84059
386663	NM_198816,XM_005166025	pfkfb4b	6-phosphofructo-2-kinase/fructose-2,6-biphosphatase 4b	protein_coding	NP_942111.1;XP_005166082.1	ZDB-GENE-031031-4	.	-3.39322	1492.96	0.223045	-7.90269	2.72956e-15	1.69604e-13	9.4086	11.1714	10.7586	11.1173	10.5719	9.81507	9.78338	9.85262	1925	2644	1487	1000	641	746	31.687	42.5826	25.7852	9.94397	9.68828	10.5549	103.033	132.823	86.4053	32.536	30.6589	34.8272
386722	NM_001319131	dnaaf1	dynein, axonemal, assembly factor 1	protein_coding	NP_001306060.1	ZDB-GENE-031114-4	.	3.88758	95.4771	0.343806	5.69761	1.215e-08	2.65302e-07	7.24616	5.2906	5.89076	5.91051	5.98646	7.01241	6.92566	6.40299	33	32	38	284	173	92	0.727004	0.706804	0.899086	3.87544	3.57536	1.78344	2.3639	2.20465	3.0128	12.6802	11.3144	5.88466
386848	NM_001166122	pcp4a	Purkinje cell protein 4a	protein_coding	NP_001159594.1	ZDB-GENE-031118-105	.	-2.79317	409.58	0.255616	-5.79739	6.73556e-09	1.56128e-07	7.75735	9.23551	9.13423	8.78068	8.85831	7.96138	8.34199	7.98878	686	431	479	257	291	189	37.7589	23.1742	27.7934	8.53739	14.7026	8.92336	122.776	72.2846	93.1344	27.9338	46.527	29.4437
386933	NM_201035,XM_005159281,XM_021467600	kcnj1a.1	potassium inwardly-rectifying channel, subfamily J, member 1a, tandem duplicate 1	protein_coding	NP_957329.1;XP_005159338.1;XP_021323275.1	ZDB-GENE-031118-55	.	-2.45693	25.9112	0.453129	-2.862	0.00420977	0.0185895	3.89225	5.20844	4.69778	4.87821	4.83866	4.49346	4.27504	4.49476	27	36	34	27	8	19	0.497053	0.652283	0.803317	0.292708	0.131667	0.300201	1.6162	2.03459	2.69188	0.957723	0.416664	0.99055
386940	XM_021479917	traf3ip2b	TRAF3 interacting protein 2b	protein_coding	XP_021335592.1	ZDB-GENE-031118-74	.	3.44357	42.6054	0.435938	4.09211	4.27469e-05	0.000390282	6.04508	4.26151	5.13769	4.9565	4.7629	5.77149	5.55536	5.42234	27	16	8	125	62	53	0.911992	0.521269	0.271145	2.61617	1.96511	1.57968	2.96541	1.62594	0.908597	8.55994	6.21866	5.21234
386963	XM_021466313	pcp4b	Purkinje cell protein 4b	protein_coding	XP_021321988.1	ZDB-GENE-031118-117	.	-4.72311	389.876	0.364469	-6.1452	7.98605e-10	2.21823e-08	7.09572	9.32861	8.9693	9.02319	8.64577	7.15681	7.89517	7.78837	638	633	424	81	189	172	20.5186	19.9085	14.3747	1.56428	5.55953	4.74205	66.7178	62.0984	48.1691	5.11824	17.5934	15.647
386994	NM_200123	rab11al	RAB11a, member RAS oncogene family, like	protein_coding	NP_956417.1	ZDB-GENE-031118-188	.	2.06987	131.139	0.250904	4.18302	2.87656e-05	0.000277145	7.46601	6.4174	6.66746	6.66585	6.78913	7.27854	7.34403	7.02824	73	68	84	278	203	143	1.94879	1.76974	2.37714	4.50357	4.98115	3.29378	6.33664	5.52013	7.9657	14.7354	15.763	10.8682
387258	NM_198918	foxi3b	forkhead box I3b	protein_coding	NP_944600.1	ZDB-GENE-031126-4	.	2.36938	33.3018	0.409195	3.04137	0.00235506	0.0115916	5.55289	4.29712	4.8469	4.70503	4.80818	5.04168	5.35222	5.17053	21	13	18	52	60	47	0.679576	0.403363	0.633441	1.06001	1.83379	1.36492	2.20969	1.25817	2.12263	3.4683	5.80311	4.5037
387293	NM_001290479,XM_009305556	mmp13a	matrix metallopeptidase 13a	protein_coding	NP_001277408.1;XP_009303831.1	ZDB-GENE-031202-2	.	19.7852	118.474	0.40247	10.6998	1.0199e-26	1.69769e-24	7.81759	3.50501	5.41549	5.37128	5.36548	6.77627	7.42983	7.03335	12	9	9	224	315	216	0.288741	0.231412	0.247576	3.55504	7.58099	4.86512	0.938863	0.721817	0.829618	11.6319	23.9903	16.053
387526	NM_199215	ca2	carbonic anhydrase II	protein_coding	NP_954685.1	ZDB-GENE-031219-5	.	-2.27251	1149.9	0.173458	-6.82748	8.64188e-12	3.31407e-10	9.45787	10.6408	10.5148	10.397	10.3121	9.62981	9.83776	9.69776	1634	1342	1239	915	802	710	16.8714	13.5366	13.4962	5.70231	7.58695	6.28992	54.8586	42.2232	45.2253	18.6576	24.0092	20.7543
387527	NM_199216,XM_005157851	cyp4t8	cytochrome P450, family 4, subfamily T, polypeptide 8	protein_coding	NP_954686.1;XP_005157908.1	ZDB-GENE-031219-3	.	-3.05231	39.2459	0.393906	-4.08702	4.36942e-05	0.000397819	4.27007	5.88748	5.62069	5.2153	5.46701	4.92385	4.80872	4.91956	70	34	53	32	15	22	1.62968	0.774185	1.27184	0.444927	0.32183	0.435357	5.29901	2.41483	4.26189	1.45577	1.01845	1.43651
387533	NM_207642,XM_005167541,XM_005167542,XM_021478628,XM_021478629	gja3	gap junction protein, alpha 3	protein_coding	NP_997525.1;XP_005167598.1;XP_005167599.1;XP_021334303.1;XP_021334304.1	ZDB-GENE-031217-3	.	-3.39756	212.186	0.300518	-5.87153	4.31789e-09	1.04407e-07	6.58996	8.35773	8.05157	8.21606	7.59352	7.12072	6.88042	7.15693	323	364	177	157	70	117	3.83276	4.18055	2.21892	1.19024	0.920106	1.95671	12.4625	13.0399	7.43552	3.89438	2.91171	6.45641
387592	NM_199281	slc13a1	solute carrier family 13 member 1	protein_coding	NP_954975.1	ZDB-GENE-031222-3	.	-3.26807	38.642	0.438585	-3.89534	9.806e-05	0.000795949	4.17007	5.88953	5.61922	5.49237	5.05588	4.88738	4.74896	4.82757	73	57	27	32	14	19	1.33086	1.01056	0.510505	0.350824	0.231967	0.287695	4.32739	3.15212	1.71068	1.14787	0.734069	0.949284
393108	NM_200139	cyp2p6	cytochrome P450, family 2, subfamily P, polypeptide 6	protein_coding	NP_956433.1	ZDB-GENE-040426-790	.	-3.23849	87.5965	0.327146	-5.18215	2.19339e-07	3.68846e-06	5.3746	7.06292	6.43765	6.90788	6.58686	5.77553	5.8695	6.04347	90	155	105	48	38	56	1.57764	2.66864	1.94552	0.509279	0.603888	0.847243	5.12981	8.32398	6.51937	1.66633	1.91103	2.79558
393132	NM_200163	irak4	interleukin-1 receptor-associated kinase 4	protein_coding	NP_956457.1	ZDB-GENE-040426-738	.	2.28118	252.236	0.211756	5.61866	1.92448e-08	4.05005e-07	8.45351	7.26597	7.46861	7.72281	7.49731	8.26393	8.12171	8.22499	121	163	120	553	314	376	3.34682	4.43148	3.51856	9.31001	8.0164	8.98733	10.8824	13.8226	11.7905	30.4618	25.3682	29.6548
393153	NM_200184	serpine2	serpin peptidase inhibitor, clade E (nexin, plasminogen activator inhibitor type 1), member 2	protein_coding	NP_956478.1	ZDB-GENE-040426-848	.	2.00162	152.624	0.222871	4.49213	7.05144e-06	8.13554e-05	7.66879	6.66903	6.94811	6.99977	6.87	7.47295	7.3172	7.53392	94	95	79	310	171	238	2.6666	2.63927	2.3435	5.31142	4.43956	5.79787	8.67064	8.23237	7.85298	17.3786	14.0491	19.1308
393191	NM_200222	gpx8	glutathione peroxidase 8 (putative)	protein_coding	NP_956516.1	ZDB-GENE-040426-965	.	-2.98641	72.9905	0.356256	-4.43056	9.3989e-06	0.000104401	5.20146	6.77064	6.22025	6.66543	6.17238	5.54864	5.712	5.81625	80	135	71	40	37	48	2.22166	3.66051	2.08255	0.664284	0.921556	1.12469	7.22388	11.4178	6.97855	2.17349	2.9163	3.71105
393207	NM_200238,XM_005167920	vil1	villin 1	protein_coding	NP_956532.1;XP_005167977.1	ZDB-GENE-040426-799	.	-2.18819	540.701	0.203881	-5.54117	3.00455e-08	6.05949e-07	8.40706	9.53518	9.35941	9.07742	9.44773	8.58998	8.71561	8.69474	719	485	755	451	357	368	9.62141	6.34011	10.7896	3.68733	4.37992	4.18574	31.2847	19.776	36.1554	12.0647	13.8604	13.8114
393242	NM_200272,XM_005171227,XM_017357919	zgc:56628	zgc:56628	protein_coding	NP_956566.1;XP_005171284.1;XP_017213408.1	ZDB-GENE-040426-1099	.	-2.3799	32.7912	0.525917	-2.37852	0.0173824	0.0571724	4.29708	5.52118	5.33288	4.89676	5.11838	4.41837	4.88116	4.8051	58	25	39	10	28	25	1.97376	0.799661	1.31195	0.199841	0.851446	0.731172	6.41783	2.49429	4.3963	0.653866	2.69443	2.41259
393244	NM_200274	ankrd22	ankyrin repeat domain 22	protein_coding	NP_956568.1	ZDB-GENE-040426-1120	.	2.38415	13.457	0.59704	2.09948	0.0357749	0.099816	4.24692	2.98683	3.6666	3.63014	3.47816	3.81632	3.8628	3.84177	10	8	3	26	20	20	0.419665	0.340778	0.109969	0.701904	0.803561	0.761198	1.36457	1.06295	0.368501	2.29659	2.5429	2.51166
393284	NM_200314	pdgfrl	platelet-derived growth factor receptor-like	protein_coding	NP_956608.2	ZDB-GENE-040426-901	.	-2.10498	168.054	0.247354	-4.34117	1.41726e-05	0.0001497	6.75936	7.83145	7.68676	7.69392	7.32096	7.01765	7.08229	7.03967	237	224	140	153	113	112	7.34536	6.77261	4.58422	2.85136	3.19607	2.97215	23.884	21.125	15.3615	9.32945	10.1141	9.80695
393290	NM_001320347	cog6	component of oligomeric golgi complex 6	protein_coding	NP_001307276.1	ZDB-GENE-040426-909	.	2.29363	641.389	0.189207	6.32973	2.45593e-10	7.41328e-09	9.80273	8.60601	8.88448	8.80239	8.96449	9.70335	9.56903	9.40563	355	297	375	1534	886	778	6.23396	5.09687	6.94385	16.2906	14.2877	11.7521	20.2702	15.8981	23.2686	53.3017	45.2141	38.7773
393293	NM_200323	hsd11b1la	hydroxysteroid (11-beta) dehydrogenase 1-like a	protein_coding	NP_956617.2	ZDB-GENE-040426-1002	.	-2.45533	37.1807	0.3875	-3.34431	0.000824881	0.00481397	4.42407	5.72504	5.22928	5.25087	5.54361	4.91436	4.82689	4.96429	39	38	62	33	17	26	1.13804	1.09254	1.91819	0.588097	0.442672	0.651028	3.70043	3.40783	6.42776	1.92422	1.40085	2.14814
393305	NM_200334	hyi	hydroxypyruvate isomerase	protein_coding	NP_956628.1	ZDB-GENE-040426-1273	.	2.33501	116.73	0.29261	4.18108	2.90124e-05	0.00027873	7.35264	6.12965	6.22724	6.63863	6.53074	6.94599	7.09391	7.15574	40	77	66	205	167	191	1.39741	2.6701	2.45802	4.41168	5.43218	5.82722	4.54378	8.32853	8.23672	14.4347	17.1903	19.2276
393307	NM_200336	maff	v-maf avian musculoaponeurotic fibrosarcoma oncogene homolog F	protein_coding	NP_956630.1	ZDB-GENE-040426-1280	.	2.50078	881.655	0.16029	8.24992	1.58498e-16	1.09664e-14	10.299	8.9759	9.30223	9.28199	9.2718	9.97729	10.1688	9.97732	470	428	429	1721	1428	1223	14.033	12.4964	13.4943	31.0625	39.1227	31.391	45.6293	38.9785	45.219	101.634	123.805	103.578
393311	NM_200340	plekhf1	pleckstrin homology domain containing, family F (with FYVE domain) member 1	protein_coding	NP_956634.1	ZDB-GENE-040426-1289	.	3.50583	123.088	0.300521	6.02207	1.72203e-09	4.48489e-08	7.58083	5.77415	6.27277	6.27403	6.43142	7.36765	7.26606	6.8742	45	42	57	348	208	134	1.61781	1.45532	2.17442	7.60701	6.89855	4.15039	5.26043	4.53941	7.28639	24.8896	21.8307	13.6947
393312	NM_200341	slc25a27	solute carrier family 25, member 27	protein_coding	NP_956635.1	ZDB-GENE-040426-1290	.	-2.32115	18.7872	0.529914	-2.29252	0.0218755	0.0683304	3.48909	4.7195	4.49779	4.23807	4.16643	4.09066	4.00886	3.92128	35	19	16	22	11	8	1.23038	0.657722	0.570042	0.458489	0.329949	0.242489	4.00066	2.05156	1.91019	1.50015	1.04414	0.800123
393314	NM_001242942,NM_200343	pias4b	protein inhibitor of activated STAT, 4b	protein_coding	NP_001229871.1;NP_956637.2	ZDB-GENE-040426-1298	.	4.22387	34.9783	0.457242	4.54587	5.47078e-06	6.50463e-05	5.82262	3.73994	4.58445	4.77025	4.54837	5.0754	5.47403	5.30589	10	17	8	57	73	60	0.254743	0.430839	0.200171	0.909534	1.81242	1.37192	0.828314	1.34387	0.670764	2.97594	5.73548	4.52683
393316	NM_001327799,XM_009306385	zdhhc16b	zinc finger, DHHC-type containing 16b	protein_coding	NP_001314728.1;XP_009304660.1	ZDB-GENE-040426-1301	.	-2.37827	148.883	0.212706	-5.87626	4.1964e-09	1.01683e-07	6.46365	7.71087	7.49508	7.33006	7.46977	6.77408	6.81555	6.83342	206	157	190	124	88	96	3.54612	2.64572	3.4405	1.24447	1.37261	1.4095	11.5305	8.2525	11.529	4.07181	4.34367	4.65082
393320	NM_200349,XM_005158690,XM_021467125,XM_021467126	slc22a7b.1	solute carrier family 22 (organic anion transporter), member 7b, tandem duplicate 1	protein_coding	NP_956643.1;XP_005158747.1;XP_021322800.1;XP_021322801.1	ZDB-GENE-040426-1311	.	-5.98059	77.9309	0.341099	-7.56463	3.88968e-14	2.05402e-12	4.49094	7.05935	6.48565	6.58356	6.45439	5.31648	5.31161	5.64106	118	125	108	25	15	37	2.41319	2.53686	2.40313	0.295576	0.262021	0.648601	7.84665	7.91295	8.05279	0.967105	0.829175	2.14013
393321	NM_200350	ero1a	endoplasmic reticulum oxidoreductase alpha	protein_coding	NP_956644.2	ZDB-GENE-040426-1312	.	3.71518	127.9	0.248797	7.61035	2.73344e-14	1.47049e-12	7.65552	5.7596	6.42079	6.38535	6.24591	7.22203	7.36702	7.18129	56	49	38	283	227	192	1.31011	1.13309	0.932472	4.05402	4.93578	3.90153	4.25991	3.53433	3.12467	13.2645	15.6195	12.8736
393329	NM_200358	slc10a2	solute carrier family 10 (sodium/bile acid cotransporter), member 2	protein_coding	NP_956652.1	ZDB-GENE-040426-1328	.	-2.42098	47.5521	0.389605	-3.27407	0.00106011	0.00592587	4.80472	6.06943	5.49857	5.72044	5.88469	5.13028	5.41495	5.11745	43	58	75	33	40	22	1.02396	1.34417	1.90309	0.466871	0.879779	0.437373	3.32949	4.19272	6.37719	1.52757	2.78409	1.44317
393349	NM_200378	mis12	MIS12 kinetochore complex component	protein_coding	NP_956672.1	ZDB-GENE-040426-1372	.	-2.25633	37.557	0.439116	-2.67351	0.00750626	0.0296367	4.5283	5.70151	5.50682	5.11589	5.38523	4.90822	4.75195	5.1217	61	29	48	32	13	36	2.11918	0.974383	1.75999	0.661894	0.415722	1.0822	6.89068	3.03928	5.89766	2.16567	1.31557	3.57084
393353	NM_200382,XM_021469764	clcnk	chloride channel K	protein_coding	NP_956676.1;XP_021325439.1	ZDB-GENE-040426-1379	.	-2.32098	58.8694	0.364424	-3.3333	0.000858213	0.00497954	5.14109	6.36547	5.89473	6.30224	5.83784	5.61019	5.4024	5.57279	61	102	53	61	26	40	0.879816	1.54322	0.814351	0.542851	0.339463	0.506349	2.86079	4.81358	2.72886	1.77617	1.07424	1.67076
393364	NM_200393	ildr1a	immunoglobulin-like domain containing receptor 1a	protein_coding	NP_956687.1	ZDB-GENE-040426-1412	.	2.88648	166.231	0.357885	4.27319	1.92693e-05	0.000195252	7.94683	6.42164	6.48928	6.85239	7.062	7.89523	7.52258	7.31774	42	76	106	507	221	181	0.825452	1.46224	2.21246	6.09857	4.0278	3.08433	2.68402	4.56101	7.41388	19.9541	12.7461	10.1771
393367	NM_200396,XM_017352760	coro6	coronin 6	protein_coding	NP_956690.1;XP_017208249.1	ZDB-GENE-040426-1202	.	-2.72262	279.496	0.338945	-4.26322	2.01498e-05	0.000203009	7.22847	8.67606	7.96081	8.80333	8.09927	7.68992	7.53551	7.46726	232	573	262	263	141	135	6.193	14.8492	7.32193	4.20141	3.49877	3.0865	20.137	46.3174	24.5355	13.7467	11.072	10.1843
393368	NM_200397	zmynd10	zinc finger, MYND-type containing 10	protein_coding	NP_956691.1	ZDB-GENE-040426-1218	.	2.55521	36.6873	0.484226	2.79507	0.0051889	0.0220894	5.72342	4.36035	4.81954	4.88745	4.86032	4.87813	5.40821	5.5559	17	19	18	33	60	79	0.490977	0.526336	0.534261	0.575026	1.60611	1.98226	1.59645	1.64174	1.79029	1.88145	5.08258	6.54071
393370	NM_001045138	pdcd2	programmed cell death 2	protein_coding	NP_001038603.1	ZDB-GENE-040426-1236	.	-2.14436	38.1339	0.373595	-2.94583	0.00322084	0.0149535	4.60892	5.69671	5.22431	5.43766	5.453	4.8897	5.094	4.9881	36	49	51	28	30	25	1.10444	1.46794	1.67316	0.509572	0.844232	0.645016	3.59116	4.57879	5.60668	1.66729	2.67161	2.12831
393384	NM_200412,XM_009303623	spata6l	spermatogenesis associated 6-like	protein_coding	NP_956706.1;XP_009301898.1	ZDB-GENE-040426-1369	.	2.24385	78.9242	0.33111	3.52142	0.000429236	0.00279557	6.77169	5.60239	6.01771	6.12465	5.70175	6.3507	6.5573	6.52123	49	55	24	134	120	121	1.50366	1.50351	0.729423	2.58353	3.40151	3.39443	4.88926	4.68974	2.44427	8.45316	10.7642	11.2003
393393	NM_200421,XM_009306350,XM_021480035,XM_021480036	adprm	ADP-ribose/CDP-alcohol diphosphatase, manganese-dependent	protein_coding	NP_956715.1;XP_009304625.1;XP_021335710.1;XP_021335711.1	ZDB-GENE-040426-1406	.	2.05967	59.6503	0.41454	2.51463	0.0119157	0.0425357	6.32986	5.2802	5.70353	5.32479	5.732	5.83493	6.31456	5.88461	43	17	43	87	117	67	0.774767	0.285035	0.810178	0.959021	2.14448	1.17138	2.51921	0.889076	2.71487	3.13786	6.78629	3.8651
393394	NM_200422	btr30	bloodthirsty-related gene family, member 30	protein_coding	NP_956716.1	ZDB-GENE-040426-1407	.	3.41289	97.7666	0.352929	5.01798	5.22173e-07	7.98591e-06	7.23939	5.47347	5.73334	6.06302	6.24256	6.97036	6.85878	6.67663	20	40	56	260	153	128	0.392061	0.754144	1.14802	3.09457	2.75561	2.15478	1.27482	2.35231	3.84696	10.1252	8.72022	7.10995
393398	NM_200426,XM_017352203,XM_017352204	ctss1	cathepsin S, ortholog 1	protein_coding	NP_956720.1;XP_017207692.1;XP_017207693.1	ZDB-GENE-040426-1583	.	2.73137	29.605	0.495909	2.92317	0.00346487	0.015896	5.44165	3.97717	4.74295	4.43379	4.50591	4.76306	5.08001	5.16208	23	8	11	39	48	58	0.515486	0.158779	0.238407	0.488435	1.03102	1.02797	1.67614	0.495262	0.798892	1.59813	3.26271	3.39192
393408	NM_200436	znf800b	zinc finger protein 800b	protein_coding	NP_956730.1	ZDB-GENE-040426-1166	.	2.85906	292.711	0.17583	8.61932	6.73522e-18	5.48634e-16	8.76063	7.24508	7.58976	7.68081	7.65476	8.42941	8.49291	8.4547	128	137	134	617	446	452	2.11189	2.21278	2.3264	6.16363	6.75506	6.41725	6.86695	6.90209	7.79565	20.167	21.3767	21.1745
393421	NM_200449,XR_002459129	etnppl	ethanolamine-phosphate phospho-lyase	protein_coding	NP_956743.1	ZDB-GENE-040426-1133	.	-2.4019	228.619	0.213748	-5.91432	3.3325e-09	8.23128e-08	7.06823	8.33556	8.13677	8.11179	7.94145	7.44321	7.25541	7.47182	320	291	241	213	107	157	8.35005	7.39249	6.5728	3.36202	2.48078	3.6335	27.1508	23.0586	22.0252	11.0003	7.85052	11.9892
393442	NM_200470,XM_009298567	crispld1b	cysteine-rich secretory protein LCCL domain containing 1b	protein_coding	NP_956764.1;XP_009296842.1	ZDB-GENE-040426-1204	.	-3.61914	203.18	0.311958	-5.94838	2.70809e-09	6.79864e-08	6.45589	8.31549	7.65312	8.30505	7.67042	7.0359	6.90055	6.92232	211	417	205	148	79	87	3.72701	7.21291	3.82056	1.57598	1.27685	1.31719	12.1186	22.4984	12.8025	5.15652	4.04065	4.34621
393455	NM_200483,XM_005167544,XM_005167545	hao2	hydroxyacid oxidase 2 (long chain)	protein_coding	NP_956777.1;XP_005167601.1;XP_005167602.1	ZDB-GENE-040426-1239	.	-2.77219	136.919	0.228357	-6.44177	1.18087e-10	3.75182e-09	6.17733	7.65441	7.37405	7.39756	7.20771	6.66502	6.54782	6.58855	194	187	150	119	65	74	4.61355	4.27301	3.74846	1.73115	1.41778	1.49787	15.0013	13.3283	12.5609	5.66421	4.48662	4.9424
393460	XM_017356726	ldlrb	low density lipoprotein receptor b	protein_coding	XP_017212215.1	ZDB-GENE-040426-1254	.	2.25119	1502.42	0.206385	5.67236	1.40846e-08	3.04361e-07	11.0226	9.85256	9.95901	10.106	10.2511	10.973	10.7363	10.6456	689	783	956	3732	1928	1843	8.10162	9.00243	11.863	26.5345	20.8053	18.6273	26.343	28.0803	39.7523	86.8193	65.8393	61.4631
393463	NM_200491	tbc1d19	TBC1 domain family, member 19	protein_coding	NP_956785.1	ZDB-GENE-040426-1265	.	-2.1121	233.716	0.214448	-5.03002	4.90439e-07	7.53066e-06	7.2283	8.31055	8.06685	8.11315	8.0514	7.55703	7.3154	7.60619	286	283	267	240	112	182	6.85065	6.62835	6.73816	3.47317	2.45431	3.73872	22.2754	20.675	22.5793	11.364	7.76674	12.3363
393468	XM_009302090	vstm2l	V-set and transmembrane domain containing 2 like	protein_coding	XP_009300365.1	ZDB-GENE-040426-1548	.	2.18979	81.3724	0.289437	3.90687	9.35004e-05	0.000765158	6.80531	5.6697	5.98052	5.96602	6.11485	6.35499	6.54912	6.65573	43	39	52	129	114	139	2.36903	2.06535	3.0073	4.28995	5.75117	6.54514	7.70307	6.44223	10.0773	14.0364	18.1998	21.5965
393484	NM_200512,XM_005163733	cyp2k18	cytochrome P450, family 2, subfamily K, polypeptide 18	protein_coding	NP_956806.1;XP_005163790.1	ZDB-GENE-040426-1584	.	4.00884	144.13	0.288844	6.93517	4.05729e-12	1.64956e-10	7.84948	5.84858	6.46175	6.32837	6.57199	7.59253	7.15084	7.51327	53	38	61	407	161	265	0.903548	0.6206	1.0885	4.20366	2.52304	3.88548	2.93795	1.93577	3.64752	13.7541	7.98425	12.8206
393489	NM_200517,XM_005164201,XM_005164202,XM_009299701,XM_021469821	zfand2a	zinc finger, AN1-type domain 2A	protein_coding	NP_956811.1;XP_005164258.1;XP_005164259.1;XP_009297976.1;XP_021325496.1	ZDB-GENE-040426-1596	.	2.25454	612.256	0.189661	6.18383	6.2566e-10	1.77214e-08	9.72872	8.55474	8.76821	8.87029	8.84705	9.29937	9.57849	9.5845	316	339	334	997	921	982	9.00361	9.47921	9.89373	17.4344	24.5836	23.7304	29.2759	29.5674	33.1535	57.0442	77.7958	78.3013
393492	NM_200520	lbh	limb bud and heart development	protein_coding	NP_956814.1	ZDB-GENE-040426-1613	.	-2.3965	57.1815	0.365549	-3.44942	0.000561802	0.00349733	5.07738	6.3327	5.82388	6.26814	5.80967	5.38344	5.47844	5.56896	57	101	53	41	33	42	1.94786	3.38155	1.9169	0.831298	1.02282	1.21082	6.33362	10.5477	6.42346	2.71996	3.23676	3.99524
393493	NM_200521	gstt2	glutathione S-transferase theta 2	protein_coding	NP_956815.1	ZDB-GENE-040426-1617	.	-2.31323	58.9343	0.312407	-3.87286	0.000107566	0.000860573	5.16133	6.359	6.03569	6.15244	5.9297	5.4295	5.60577	5.61329	74	82	60	41	39	42	2.31723	2.52245	1.99832	0.769709	1.10724	1.11992	7.53463	7.86799	6.69629	2.51844	3.50391	3.69531
393497	NM_200525	ndufa11	NADH dehydrogenase (ubiquinone) 1 alpha subcomplex, 11	protein_coding	NP_956819.1	ZDB-GENE-040426-1631	.	-2.17856	61.1851	0.295885	-3.79667	0.00014665	0.00111546	5.26238	6.3921	6.19431	5.97843	6.10737	5.69106	5.60677	5.59074	88	60	74	64	36	37	7.5795	5.03186	6.77298	3.31699	2.85244	2.68558	24.6453	15.6953	22.696	10.853	9.02666	8.86139
393501	NM_200529	marveld3	MARVEL domain containing 3	protein_coding	NP_956823.1	ZDB-GENE-040426-1641	.	2.47614	26.5516	0.61567	2.12467	0.0336141	0.0950807	5.23686	3.94426	4.25208	4.69981	4.26516	5.13657	4.59755	4.6242	7	26	7	93	24	27	0.1596	0.613391	0.163304	1.35135	0.527825	0.546377	0.518951	1.91328	0.547226	4.42153	1.67032	1.80284
393530	NM_001331200,NM_200558,XM_017353529,XM_017353530	mybpha	myosin binding protein Ha	protein_coding	NP_001318129.1;NP_956852.2;XP_017209018.1;XP_017209019.1	ZDB-GENE-040426-1531	.	-3.11409	283.157	0.294755	-5.55991	2.6992e-08	5.48703e-07	7.10245	8.74448	8.14827	8.76694	8.1639	7.62179	7.48542	7.42157	291	549	282	238	130	125	5.89374	10.6447	5.81126	2.86931	2.50586	2.04725	19.1639	33.2027	19.4733	9.38822	7.9299	6.75515
393548	NM_200576	gadd45aa	growth arrest and DNA-damage-inducible, alpha, a	protein_coding	NP_956870.2	ZDB-GENE-040426-1501	.	2.40939	153.411	0.221254	5.734	9.80916e-09	2.19189e-07	7.76064	6.49121	6.87613	6.93487	6.7191	7.46158	7.51241	7.48051	86	88	63	310	222	226	3.04239	3.04963	2.37101	6.67958	7.27712	6.92576	9.89254	9.51237	7.94515	21.8552	23.0287	22.8524
393561	NM_200589	abcc2	ATP-binding cassette, sub-family C (CFTR/MRP), member 2	protein_coding	NP_956883.2	ZDB-GENE-040426-1523	.	2.43593	1294.94	0.179856	7.14168	9.21942e-13	4.12825e-11	10.8426	9.55758	9.8595	9.73661	9.94438	10.4889	10.7327	10.5515	696	553	738	2401	2109	1830	6.30497	4.89913	7.05119	13.1427	17.5275	14.2459	20.5011	15.2813	23.6283	43.002	55.4665	47.006
393568	NM_200596,XM_021478631	tmem30c	transmembrane protein 30C	protein_coding	NP_956890.1;XP_021334306.1	ZDB-GENE-040426-1127	.	-2.23088	44.5551	0.378842	-3.05565	0.0022457	0.0111513	4.79573	5.93864	5.72794	5.69703	5.36802	5.04753	5.27158	5.21414	67	60	35	30	33	31	0.642943	0.557336	0.350602	0.171671	0.284662	0.248213	2.09058	1.73844	1.17485	0.561698	0.900823	0.819008
393570	NM_200598	irf6	interferon regulatory factor 6	protein_coding	NP_956892.1	ZDB-GENE-040426-1137	.	3.33257	75.5025	0.316197	5.49226	3.96832e-08	7.82001e-07	6.86057	5.12089	5.77644	5.59072	5.7747	6.45817	6.61712	6.27841	36	22	34	170	141	95	0.568557	0.331225	0.572835	1.65041	2.08531	1.30286	1.8487	1.03315	1.91955	5.40003	6.59905	4.29896
393580	NM_200608,XM_021477437	bco1l	beta-carotene oxygenase 1, like	protein_coding	NP_956902.1;XP_021333112.1	ZDB-GENE-040426-1191	.	-6.70925	35.5183	0.512163	-5.36187	8.23664e-08	1.51606e-06	3.19271	5.95171	5.61353	4.95631	5.16557	4.47244	4.48333	4.31153	89	31	45	17	11	5	1.83689	0.615925	0.978922	0.212965	0.205478	0.087053	5.97278	1.92119	3.28033	0.696809	0.650242	0.28724
393586	NM_200614	hsc70	heat shock cognate 70	protein_coding	NP_956908.1	ZDB-GENE-040426-1221	.	-5.65963	565.76	0.315373	-7.92937	2.20252e-15	1.38995e-13	7.40753	9.9095	9.35857	9.84804	8.91112	8.11082	8.06427	7.94509	804	1256	463	279	173	152	14.3682	21.95	8.73179	3.00811	2.82387	2.3328	46.7193	68.4661	29.2599	9.84235	8.93624	7.69736
393592	NM_200620,XM_021468378	cyp2p9	cytochrome P450, family 2, subfamily P, polypeptide 9	protein_coding	NP_956914.1;XP_021324053.1	ZDB-GENE-040120-2	.	-4.37277	43.2209	0.429647	-4.95418	7.26343e-07	1.07713e-05	4.03079	6.13128	5.64568	5.49592	5.65848	4.65423	4.82361	5.05838	68	51	66	12	14	28	1.2071	0.937396	1.20372	0.12232	0.211968	0.411394	3.92497	2.92391	4.03363	0.400222	0.670781	1.35744
393611	NM_200638,XM_005161158,XM_005161159	c6	complement component 6	protein_coding	NP_956932.1;XP_005161215.1;XP_005161216.1	ZDB-GENE-040426-1358	.	2.8462	782.012	0.143975	10.4813	1.05308e-25	1.70355e-23	10.1766	8.66762	8.98529	9.05071	9.05326	9.86564	9.91485	9.89244	349	357	364	1658	1175	1214	5.06919	5.07723	5.5852	14.806	15.7062	14.8695	16.4828	15.8368	18.7158	48.4441	49.7029	49.0635
393629	NM_200656	guca1e	guanylate cyclase activator 1e	protein_coding	NP_956950.1	ZDB-GENE-040426-1577	.	-4.99179	290.787	0.240852	-9.63063	5.93651e-22	6.92222e-20	6.60509	8.91954	8.66185	8.24278	8.48808	7.17152	7.37196	7.18104	540	317	425	128	117	91	8.18764	4.69892	6.79181	1.16661	1.61611	1.17982	26.6227	14.6568	22.7591	3.81708	5.11424	3.89296
393650	NM_001313779,NM_200677	irf7	interferon regulatory factor 7	protein_coding	NP_001300708.1;NP_956971.2	ZDB-GENE-040426-1518	.	4.96469	73.6201	0.371727	6.21882	5.00896e-10	1.44006e-08	6.93607	4.6316	5.43458	5.6687	5.3158	6.65171	6.27124	6.34217	20	32	13	235	98	114	0.493646	0.846444	0.335394	3.65922	2.31833	2.52098	1.60512	2.64022	1.12389	11.9727	7.33645	8.31828
393653	NM_200680	rhogd	ras homolog gene family, member Gd	protein_coding	NP_956974.1	ZDB-GENE-040426-1504	.	-2.27834	94.3394	0.279268	-4.25391	2.10073e-05	0.000210593	5.85291	7.03213	6.79206	6.81121	6.62125	6.09893	6.36573	6.10539	127	122	96	72	75	51	1.59558	1.50564	1.27824	0.543496	0.866347	0.542876	5.18814	4.69638	4.28331	1.77828	2.74159	1.79128
393654	NM_200681	slc5a1	solute carrier family 5 (sodium/glucose cotransporter), member 1	protein_coding	NP_956975.1	ZDB-GENE-040426-1524	.	-5.19675	70.0606	0.310229	-7.66404	1.8017e-14	9.87752e-13	4.49209	6.87796	6.22014	6.34824	6.47333	5.41133	5.41543	5.30393	90	100	119	37	24	19	1.51482	1.6497	2.11067	0.371585	0.370424	0.263935	4.92555	5.14574	7.07276	1.2158	1.17222	0.870886
393665	NM_200692	ndrg1b	N-myc downstream regulated 1b	protein_coding	NP_956986.2	ZDB-GENE-040426-1648	.	3.41885	1179.39	0.327081	5.42223	5.8859e-08	1.11925e-06	10.8338	9.05973	9.6623	8.95586	9.61915	10.2812	10.6823	10.4651	635	211	571	2141	2219	1863	16.1705	5.24963	15.3575	32.9737	51.8846	40.7977	52.5797	16.3746	51.4623	107.888	164.191	134.617
393673	NM_200700	desi1a	desumoylating isopeptidase 1a	protein_coding	NP_956994.1	ZDB-GENE-040426-1657	.	-3.20029	420.396	0.167789	-10.0018	1.49581e-23	2.01607e-21	7.64689	9.32276	9.03386	9.01126	8.94793	8.03306	8.14849	8.02428	608	555	525	281	221	196	13.2342	11.8147	12.0595	3.6939	4.41176	3.65674	43.0321	36.8524	40.4111	12.0862	13.9612	12.0658
393677	NM_200704	aanat1	arylalkylamine N-acetyltransferase 1	protein_coding	NP_956998.1	ZDB-GENE-040329-1	.	-2.74209	25.6048	0.492004	-2.95786	0.00309788	0.0144578	3.79435	5.22247	4.91144	4.53852	4.85224	4.21735	4.46085	4.39954	43	19	37	12	18	16	1.16379	0.487283	1.07437	0.184528	0.43624	0.365285	3.78414	1.51993	3.60015	0.603764	1.3805	1.2053
393688	NM_001328572,NM_200715,XM_005164728	slc25a3a	solute carrier family 25 (mitochondrial carrier; phosphate carrier), member 3a	protein_coding	NP_001315501.1;NP_957009.1;XP_005164785.1	ZDB-GENE-040426-1673	.	-2.25283	374.997	0.195175	-6.00352	1.9309e-09	4.97809e-08	7.85159	9.01965	8.83778	8.63316	8.85542	8.0166	8.19465	8.1781	506	373	491	290	248	257	15.2867	10.0701	15.0721	5.12926	6.90061	6.66966	49.7059	31.4105	50.5058	16.7826	21.8372	22.0073
393692	NM_200719,XM_005169564	arl3l2	ADP-ribosylation factor-like 3, like 2	protein_coding	NP_957013.1;XP_005169621.1	ZDB-GENE-040426-1678	.	-2.09387	183.888	0.366311	-2.91057	0.0036077	0.0164234	6.89511	7.95856	7.94003	7.06002	7.87699	7.02521	7.24501	7.12939	303	90	268	149	137	123	11.9904	3.51807	11.1816	3.5485	4.93267	4.12584	38.9875	10.9735	37.4691	11.6105	15.6096	13.6137
393697	NM_200724,XM_005166796	guk1b	guanylate kinase 1b	protein_coding	NP_957018.1;XP_005166853.1	ZDB-GENE-020916-1	.	-2.43335	452.687	0.229318	-5.59461	2.21118e-08	4.60083e-07	8.0449	9.32481	9.21597	8.8058	9.12766	8.20912	8.46093	8.35377	694	405	598	322	304	279	25.0198	14.2625	22.7249	7.02471	10.0686	8.6164	81.3537	44.4875	76.1503	22.9844	31.8625	28.4308
393704	NM_200731,XM_005173112	gabra6a	gamma-aminobutyric acid (GABA) A receptor, alpha 6a	protein_coding	NP_957025.1;XP_005173169.1	ZDB-GENE-040426-1692	.	-5.46654	390.368	0.260178	-9.41904	4.5523e-21	4.90943e-19	6.92003	9.36553	9.00839	8.55689	9.08851	7.44676	7.69455	7.57588	670	380	694	145	143	126	11.0816	6.13024	12.1068	1.44637	2.16811	1.78921	36.0326	19.1214	40.5695	4.73243	6.86106	5.9037
393719	NM_200746	gnb5b	guanine nucleotide binding protein (G protein), beta 5b	protein_coding	NP_957040.1	ZDB-GENE-040426-1712	.	-2.05247	620.175	0.219648	-4.72283	2.32591e-06	3.03226e-05	8.66634	9.70402	9.61293	9.20346	9.60737	8.92568	8.81012	8.95864	873	508	825	620	356	459	21.6094	12.2854	21.5408	9.25974	8.08107	9.75416	70.2645	38.3205	72.1824	30.2973	25.5729	32.185
393733	NM_200760	fgf1a	fibroblast growth factor 1a	protein_coding	NP_957054.1	ZDB-GENE-040426-1729	.	-3.90381	63.5864	0.342813	-5.73165	9.94577e-09	2.22025e-07	4.71454	6.65703	6.22534	6.21671	6.13638	5.24907	5.60003	5.31771	96	89	81	27	39	22	2.44239	2.23052	2.17955	0.409208	0.911381	0.4819	7.94159	6.9574	7.30358	1.3389	2.8841	1.59009
393758	NM_001305554,NM_200785	pde6h	phosphodiesterase 6H, cGMP-specific, cone, gamma	protein_coding	NP_001292483.1;NP_957079.1	ZDB-GENE-040426-1754	.	-4.55385	282.09	0.293268	-7.45764	8.80847e-14	4.46665e-12	6.67415	8.85193	8.3805	8.30563	8.57131	7.00295	7.53225	7.17452	401	345	471	97	151	92	36.1812	30.4087	44.8439	5.21744	12.4454	7.05705	117.646	94.8503	150.27	17.0711	39.3839	23.2856
393761	NM_200788	rdh8b	retinol dehydrogenase 8b	protein_coding	NP_957082.2	ZDB-GENE-040426-1759	.	-3.62836	169.957	0.32138	-5.78543	7.23275e-09	1.66643e-07	6.19973	8.05751	7.77433	7.24263	7.85836	6.71239	6.8708	6.52989	278	136	291	109	93	55	5.85515	2.79412	6.46627	1.38412	1.78056	0.98806	19.0384	8.71538	21.6682	4.52876	5.63463	3.26022
393762	NM_200789	si:ch73-141c7.1	si:ch73-141c7.1	protein_coding	NP_957083.2	ZDB-GENE-040426-1760	.	-3.1734	259.437	0.249855	-6.66798	2.59355e-11	9.23664e-10	6.95878	8.62381	8.2575	8.52717	7.99288	7.35684	7.41463	7.4012	350	444	243	175	127	132	13.0606	16.1951	9.53458	3.92668	4.32912	4.21901	42.4675	50.5155	31.95	12.8478	13.6997	13.9211
393767	NM_200794	rom1a	retinal outer segment membrane protein 1a	protein_coding	NP_957088.1	ZDB-GENE-040426-1765	.	-5.41455	620.612	0.322413	-7.55814	4.08862e-14	2.15412e-12	7.5997	10.0324	9.88977	9.1924	9.53616	7.9443	8.47566	8.13392	1326	586	870	187	280	180	12.1264	5.23504	8.39111	1.02899	2.34879	1.40755	39.4299	16.3291	28.1183	3.36679	7.43285	4.64438
393775	NM_200802	clu	clusterin	protein_coding	NP_957096.1	ZDB-GENE-040426-1774	.	3.46428	544.396	0.166109	10.7914	3.77886e-27	6.57607e-25	9.72274	7.92974	8.38027	8.44632	8.31618	9.33731	9.45691	9.35849	222	228	192	1180	904	859	5.83567	5.85821	5.32154	18.7874	21.8527	19.4446	18.9751	18.2728	17.8323	61.471	69.1536	64.1599
393779	NM_200806	rprmb	reprimo, TP53 dependent G2 arrest mediator candidate b	protein_coding	NP_957100.1	ZDB-GENE-040426-1779	.	-2.6114	33.1021	0.583326	-2.37401	0.017596	0.0577096	4.18151	5.58674	5.20019	4.91458	5.31811	4.88223	4.34602	4.78714	47	26	54	42	3	24	1.88215	1.01479	2.27921	1.00725	0.096283	0.80009	6.11994	3.16533	7.63752	3.29564	0.304691	2.63999
393782	NM_200809,XM_005159422	dpm3	dolichyl-phosphate mannosyltransferase polypeptide 3	protein_coding	NP_957103.2;XP_005159479.1	ZDB-GENE-040426-1782	.	-3.17339	63.7092	0.505618	-3.29502	0.000984142	0.00557365	4.94676	6.59362	6.32326	5.82951	6.24808	5.01382	5.6053	5.64897	110	51	95	12	40	46	4.36708	1.95832	4.1277	0.284488	1.44406	1.55021	14.1999	6.10836	13.8317	0.930825	4.56978	5.11511
393792	NM_200819,XM_005169088,XM_009304180,XM_009304181,XM_009304183,XM_009304184,XM_021478217	kcnip3a	Kv channel interacting protein 3a, calsenilin	protein_coding	NP_957113.1;XP_005169145.1;XP_009302455.1;XP_009302456.1;XP_009302458.1;XP_009302459.1;XP_021333892.1	ZDB-GENE-040426-1791	.	-2.11412	634.016	0.184298	-5.86036	4.61858e-09	1.10976e-07	8.67013	9.74933	9.62553	9.33608	9.61233	8.88306	8.9268	8.94384	872	585	817	574	407	441	15.8527	10.6516	15.8688	6.48614	7.18334	7.20289	51.5462	33.2243	53.1756	21.2222	22.7319	23.7668
393802	NM_200829,XM_005174131,XM_005174132,XM_021469766	camk1gb	calcium/calmodulin-dependent protein kinase IGb	protein_coding	NP_957123.1;XP_005174188.2;XP_005174189.1;XP_021325441.1	ZDB-GENE-040426-1694	.	-3.64003	714.496	0.270345	-6.8947	5.39798e-12	2.164e-10	8.26802	10.1302	9.91501	9.31969	9.96458	8.57511	8.79044	8.75252	1195	574	1198	375	340	342	10.3621	6.94851	15.9336	2.20076	3.71609	3.41988	33.693	21.6737	53.3927	7.20075	11.7597	11.2843
393807	NM_200834	ppp1r3cb	protein phosphatase 1, regulatory subunit 3Cb	protein_coding	NP_957128.1	ZDB-GENE-040426-1733	.	-2.95635	665.832	0.189136	-8.2682	1.36e-16	9.49559e-15	8.39627	9.95818	9.76924	9.54067	9.65144	8.71212	8.90191	8.68333	1026	745	857	459	397	312	17.3507	12.311	15.2888	4.68624	6.16162	4.53295	56.417	38.4002	51.2323	15.3331	19.4987	14.957
393822	NM_200849,XM_005170332,XM_021468778	slc22a4	solute carrier family 22 (organic cation/zwitterion transporter), member 4	protein_coding	NP_957143.1;XP_005170389.1;XP_021324453.1	ZDB-GENE-040426-1517	.	-2.60897	39.8059	0.373766	-3.70146	0.000214361	0.00153398	4.47201	5.84346	5.42092	5.53341	5.42533	4.90897	5.13042	4.86687	49	55	47	28	31	17	0.676679	0.788707	0.655696	0.220283	0.546093	0.193247	2.20027	2.46012	2.19721	0.720751	1.72813	0.637641
393825	NM_201335	tppp3	tubulin polymerization-promoting protein family member 3	protein_coding	NP_958492.2	ZDB-GENE-040426-1909	.	-2.49983	123.386	0.335374	-3.94136	8.10213e-05	0.000677764	6.14245	7.46049	7.22582	7.38947	6.69451	6.38607	6.50148	6.59297	178	203	83	87	70	86	5.63509	6.3047	2.75439	1.65402	2.01765	2.33791	18.3229	19.6655	9.22985	5.41185	6.38493	7.71422
393828	NM_200854,XM_005170915	myoz2b	myozenin 2b	protein_coding	NP_957148.2;XP_005170972.1	ZDB-GENE-040426-1853	.	-2.91503	36.8188	0.408794	-3.77576	0.000159518	0.00120101	4.23283	5.77703	5.30548	5.56769	5.10138	4.81349	4.84849	4.78796	47	66	31	28	20	18	1.24837	1.71335	0.890182	0.437949	0.492903	0.393991	4.05915	5.34424	2.98296	1.43294	1.55981	1.30002
393832	NM_200858,XM_009299220	zgc:77748	zgc:77748	protein_coding	NP_957152.1;XP_009297495.1	ZDB-GENE-040426-1864	.	-3.75195	33.6653	0.495612	-3.84906	0.000118573	0.00093024	3.81581	5.73466	5.31153	4.89968	5.35506	4.67431	4.68219	4.39185	57	26	58	27	18	6	1.48299	0.65674	1.56082	0.416668	0.422676	0.132567	4.82206	2.04849	5.23024	1.36331	1.33757	0.43742
393845	NM_200871	pde6c	phosphodiesterase 6C, cGMP-specific, cone, alpha prime	protein_coding	NP_957165.1	ZDB-GENE-040426-1664	.	-6.76589	6287.43	0.275786	-10.0015	1.5008e-23	2.01607e-21	10.6615	13.4193	13.1509	12.5129	13.0529	11.1482	11.537	11.2744	12409	5945	10679	1803	2129	1553	120.663	56.498	109.541	10.5892	18.9845	12.9655	392.344	176.228	367.066	34.6472	60.0772	42.7811
393861	NM_200887	hhatla	hedgehog acyltransferase-like, a	protein_coding	NP_957181.1	ZDB-GENE-040426-1865	.	-2.1452	684.916	0.306957	-3.5872	0.000334249	0.00225891	8.76706	9.86754	9.47547	10.0379	9.1935	8.86624	9.05457	9.05678	715	1247	485	541	464	493	15.5788	26.5781	11.1603	7.11684	9.26844	9.23069	50.6556	82.9021	37.3975	23.2858	29.3303	30.4578
393873	NM_200899,XM_017356832	myoz2a	myozenin 2a	protein_coding	NP_957193.1;XP_017212321.1	ZDB-GENE-040426-1880	.	-3.20737	54.4059	0.397613	-4.22872	2.3503e-05	0.000232409	4.67981	6.37818	5.82179	6.22792	5.68305	5.40544	5.21761	5.17566	64	105	49	51	22	21	1.97645	3.16985	1.59548	0.954141	0.608787	0.552081	6.42655	9.88736	5.3464	3.12189	1.92653	1.82166
393874	NM_200900	tmem38a	transmembrane protein 38A	protein_coding	NP_957194.1	ZDB-GENE-040426-1888	.	-2.37263	452.577	0.314814	-3.95945	7.51233e-05	0.000633966	8.06871	9.31439	9.03855	9.3886	8.53871	8.22643	8.28224	8.49801	577	795	301	338	244	345	18.1794	24.4954	9.99001	6.42918	7.04941	9.34393	59.1116	76.4058	33.4761	21.0359	22.3081	30.8314
393875	NM_200901	sox4b	SRY (sex determining region Y)-box 4b	protein_coding	NP_957195.1	ZDB-GENE-040426-1274	.	3.53008	2843.49	0.175531	10.3668	3.51087e-25	5.44921e-23	12.1136	10.294	10.7065	10.5932	10.8445	11.8572	11.8032	11.6795	1125	900	1284	7077	4480	4151	16.4626	12.8689	19.8212	62.6014	60.1621	52.2196	53.5294	40.1405	66.42	204.828	190.385	172.305
393892	NM_200918,XM_005159605,XM_005159606,XM_005159607,XM_021468021	bzw2	basic leucine zipper and W2 domains 2	protein_coding	NP_957212.1;XP_005159662.1;XP_005159663.1;XP_005159664.1;XP_021323696.1	ZDB-GENE-040426-746	.	-2.4789	598.772	0.15825	-8.27618	1.27191e-16	8.93486e-15	8.42804	9.7366	9.49041	9.38834	9.55672	8.70541	8.7666	8.74424	787	656	806	486	353	363	19.9287	15.9759	21.145	7.42882	8.10687	7.799	64.7996	49.8319	70.856	24.3066	25.6545	25.7337
393906	NM_200932	nt5e	5'-nucleotidase, ecto (CD73)	protein_coding	NP_957226.1	ZDB-GENE-040426-1261	.	-3.3658	129.29	0.297798	-5.87965	4.11124e-09	9.97247e-08	5.88618	7.63977	7.20655	7.49085	7.00082	6.40497	6.25247	6.5218	172	226	126	89	44	76	3.59051	4.60715	2.76198	1.11482	0.830598	1.35906	11.6748	14.3705	9.25529	3.64762	2.62846	4.48439
393914	NM_001328095,XM_005169205,XM_009305596,XM_021479139	slc37a4b	solute carrier family 37 (glucose-6-phosphate transporter), member 4b	protein_coding	NP_001315024.1;XP_005169262.1;XP_009303871.1;XP_021334814.1	ZDB-GENE-040426-827	.	-2.08214	360.68	0.222927	-4.74625	2.07227e-06	2.74047e-05	7.86993	8.92905	8.6591	8.926	8.4854	8.14594	8.06427	8.14672	421	535	325	358	214	254	8.99347	10.9242	7.17391	4.88428	4.77721	4.81111	29.2429	34.0747	24.0395	15.981	15.1176	15.8748
393939	NM_200964,XM_021468382	atf3	activating transcription factor 3	protein_coding	NP_957258.1;XP_021324057.1	ZDB-GENE-040426-728	.	7.84322	1520.49	0.240772	12.3413	5.42613e-35	1.64005e-32	11.3972	8.42533	9.23631	9.27061	9.08371	10.5682	11.1627	10.8562	332	327	247	2830	3526	2729	5.65859	5.44404	4.34293	28.4881	54.1079	39.113	18.3993	16.981	14.553	93.2113	171.226	129.058
393942	NM_200967	efhc1	EF-hand domain (C-terminal) containing 1	protein_coding	NP_957261.1	ZDB-GENE-040426-1300	.	3.51845	129.139	0.28482	6.37225	1.86274e-10	5.72811e-09	7.65068	5.84121	6.21726	6.56878	6.36377	7.39099	7.10909	7.2783	37	66	47	343	164	214	0.887841	1.57046	1.19946	5.04301	3.66075	4.47753	2.88688	4.89857	4.01934	16.5004	11.5846	14.7742
393982	NM_201007,XM_005169273,XM_021479567	alpl	alkaline phosphatase, liver/bone/kidney	protein_coding	NP_957301.2;XP_005169330.1;XP_021335242.1	ZDB-GENE-040420-1	.	-2.021	762.104	0.23398	-4.33828	1.436e-05	0.000151183	8.98044	9.99308	9.94154	9.6788	9.71753	8.93099	9.32295	9.30923	1107	770	818	516	581	605	9.51832	6.99349	7.543	2.65809	4.95687	4.45003	30.9495	21.814	25.2763	8.69711	15.6862	14.6834
393989	NM_201014	rom1b	retinal outer segment membrane protein 1b	protein_coding	NP_957308.1	ZDB-GENE-040426-1073	.	-5.64933	254.022	0.661129	-3.77851	0.00015777	0.00119019	6.259	8.75308	8.58711	7.67579	8.28536	6.48382	7.23396	6.91223	567	190	391	47	122	78	15.9047	5.19051	11.5718	0.782117	3.12379	1.86757	51.7153	16.1902	38.7765	2.55904	9.88534	6.16228
393998	NM_201023	prkacba	protein kinase, cAMP-dependent, catalytic, beta a	protein_coding	NP_957317.1	ZDB-GENE-040426-1351	.	2.43233	24.9489	0.524009	2.44716	0.0143985	0.0493876	5.14757	3.85315	4.32179	4.31684	4.47712	4.41749	4.8674	4.87395	11	10	17	25	44	47	0.201298	0.177102	0.327784	0.273544	0.731006	0.733546	0.654534	0.552414	1.09839	0.895019	2.3133	2.42042
394005	NM_201030,XM_005157058	prkg1a	protein kinase, cGMP-dependent, type Ia	protein_coding	NP_957324.1;XP_005157115.1	ZDB-GENE-040426-1308	.	2.03291	1131.19	0.188063	5.44258	5.25157e-08	1.01033e-06	10.5662	9.54345	9.6235	9.9071	9.76366	10.4731	10.3478	10.2624	561	756	641	2522	1471	1414	7.8257	10.3624	9.44522	21.4076	18.9733	17.1132	25.4458	32.3222	31.6505	70.0443	60.0416	56.4671
394007	NM_201032	xpnpep2	X-prolyl aminopeptidase (aminopeptidase P) 2, membrane-bound	protein_coding	NP_957326.2	ZDB-GENE-040426-1151	.	-2.3614	46.0286	0.367387	-3.37422	0.000740263	0.00439509	4.76829	6.01804	5.74571	5.7139	5.54891	5.26185	5.0135	5.31365	66	59	46	46	16	36	1.02937	0.901195	0.752895	0.428875	0.219697	0.472724	3.34706	2.811	2.52292	1.40325	0.695239	1.55981
394023	NM_001320534	pdia2	protein disulfide isomerase family A, member 2	protein_coding	NP_001307463.1	ZDB-GENE-040426-705	.	-2.41317	98.8024	0.471804	-2.69376	0.00706503	0.028323	5.86263	7.12327	7.16145	6.2925	6.68684	5.79086	6.50714	6.08572	204	60	108	41	96	52	4.84823	1.38505	2.69579	0.578395	2.08788	1.06313	15.7644	4.32021	9.03349	1.89247	6.60719	3.50791
394038	NM_201063	chad	chondroadherin	protein_coding	NP_957357.1	ZDB-GENE-040426-1130	.	-5.20153	134.569	0.409312	-5.81203	6.1718e-09	1.44224e-07	5.45013	7.81647	7.28192	7.66971	6.78443	5.85952	6.28397	6.27032	200	290	102	34	54	56	3.37106	4.78482	1.82004	0.339229	0.83065	0.814082	10.9612	14.9247	6.09887	1.10993	2.62862	2.68616
394048	NM_201073	h2afx	H2A histone family, member X	protein_coding	NP_957367.1	ZDB-GENE-040426-987	.	-2.17718	141.332	0.215683	-5.2042	1.94834e-07	3.30785e-06	6.47841	7.59619	7.35886	7.31744	7.35308	6.70802	6.76401	6.87517	180	160	170	117	85	107	12.7828	11.1326	12.7354	5.00833	5.5475	6.51447	41.5641	34.7246	42.6756	16.3869	17.5553	21.4953
394066	NM_201091,XM_005159535,XM_009294134	lin28a	lin-28 homolog A (C. elegans)	protein_coding	NP_957385.1;XP_005159592.1;XP_009292409.1	ZDB-GENE-040426-747	.	3.00082	221.729	0.241429	6.56655	5.14941e-11	1.74208e-09	8.37765	6.79254	7.14684	7.40807	7.07701	7.96913	8.01197	8.16523	90	125	76	444	314	397	0.767878	1.04452	0.679271	2.76488	2.5869	3.26432	2.49681	3.25804	2.27621	9.0465	8.18635	10.771
394068	NM_201093	tnni2a.2	troponin I type 2a (skeletal, fast), tandem duplicate 2	protein_coding	NP_957387.1	ZDB-GENE-040426-970	.	-2.82202	691.59	0.265547	-5.6364	1.7364e-08	3.68641e-07	8.49949	9.99615	9.53036	10.0537	9.38344	8.81124	8.82402	8.8875	773	1283	620	513	349	403	14.1522	22.9587	11.9735	5.67382	5.86257	6.32748	46.0169	71.6123	40.1228	18.5644	18.5523	20.8783
394076	NM_201101	h3f3d	H3 histone, family 3D	protein_coding	NP_957395.1	ZDB-GENE-040426-1023	.	2.06922	717.62	0.15438	6.79551	1.07932e-11	4.05778e-10	9.91865	8.86847	9.12999	9.08431	9.12001	9.6144	9.75404	9.76038	437	385	410	1276	1004	1071	21.6212	18.6224	21.41	38.21	45.6352	45.602	70.303	58.0867	71.744	125.021	144.414	150.469
394124	NM_201149,XM_005163259	cdc14aa	cell division cycle 14Aa	protein_coding	NP_957443.1;XP_005163316.1	ZDB-GENE-040426-1214	.	-2.01451	148.695	0.307381	-3.28723	0.0010118	0.00570217	6.62494	7.63439	7.34833	7.02985	7.68788	6.86431	6.96004	6.80402	172	105	247	143	110	92	3.18658	1.89675	4.83465	1.61395	1.87803	1.46982	10.3614	5.91633	16.2007	5.28074	5.94308	4.84983
394127	NM_201152,XM_009300113,XM_009300114,XM_009300115	tspan12	tetraspanin 12	protein_coding	NP_957446.1;XP_009298388.1;XP_009298389.1;XP_009298390.1	ZDB-GENE-040426-1285	.	-2.60294	167.668	0.27514	-5.01614	5.27189e-07	8.04655e-06	6.54049	7.92035	7.60926	7.86091	7.29201	6.89306	6.92287	6.90524	220	277	140	135	94	97	5.87503	7.20717	3.92129	2.15093	2.2604	2.23249	19.1031	22.4805	13.1401	7.03772	7.15313	7.36637
394142	NM_201167,XM_005171729	hpda	4-hydroxyphenylpyruvate dioxygenase a	protein_coding	NP_957461.1;XP_005171786.1	ZDB-GENE-040426-986	.	-2.05229	43.4333	0.417332	-2.48539	0.0129411	0.0453223	4.83985	5.86366	5.81716	5.25447	5.50755	5.03268	5.24461	5.21622	79	29	47	31	33	33	1.90636	0.674671	1.19736	0.450463	0.729561	0.672685	6.19866	2.10443	4.0123	1.47389	2.30872	2.21961
394148	NM_201173	cyp7a1	cytochrome P450, family 7, subfamily A, polypeptide 1	protein_coding	NP_957467.2	ZDB-GENE-040426-1296	.	-25.7061	68.6107	0.483615	-9.68547	3.47602e-22	4.24722e-20	2.36713	7.04507	6.43452	5.83181	6.40257	4.64357	4.6795	4.74566	148	66	136	7	4	7	3.2841	1.41769	3.16905	0.091438	0.07264	0.124934	10.6785	4.42203	10.6194	0.299178	0.229871	0.412234
394151	NM_201176	atp5g3a	ATP synthase, H+ transporting, mitochondrial Fo complex, subunit C3 (subunit 9), genome duplicate a	protein_coding	NP_957470.1	ZDB-GENE-040426-857	.	-2.1342	868.955	0.201865	-5.41795	6.02856e-08	1.14353e-06	9.11582	10.2084	10.0536	10.1263	9.75533	9.26234	9.42719	9.38608	1159	1176	783	719	597	600	52.2201	51.7581	37.211	19.5598	24.6534	23.2158	169.798	161.443	124.692	63.9985	78.0165	76.6031
394160	NM_201185	bokb	BCL2-related ovarian killer b	protein_coding	NP_957479.1	ZDB-GENE-040426-1346	.	-5.65089	24.9857	0.522169	-4.78481	1.71153e-06	2.3134e-05	2.88694	5.41191	4.64862	4.55493	5.00671	4.13618	4.03422	4.10161	32	25	55	14	5	8	1.1073	0.837023	2.00863	0.28634	0.133028	0.225965	3.60046	2.61083	6.73083	0.936887	0.420973	0.7456
394183	NM_001308611,XM_005158451	grinab	glutamate receptor, ionotropic, N-methyl D-aspartate-associated protein 1b (glutamate binding)	protein_coding	NP_001295540.1;XP_005158508.1	ZDB-GENE-040426-1367	.	2.04186	1295.31	0.156276	6.59016	4.39339e-11	1.50403e-09	10.7641	9.73398	9.90074	9.91557	10.0707	10.5065	10.6072	10.5754	715	682	844	2403	1805	1845	19.0902	17.7859	23.7587	38.7729	44.2074	42.3243	62.0733	55.4776	79.6144	126.863	139.896	139.654
394184	NM_201209	sh3bgrl	SH3 domain binding glutamate-rich protein like	protein_coding	NP_957503.1	ZDB-GENE-040426-1376	.	-2.20451	439.956	0.280632	-4.0639	4.82602e-05	0.000430853	8.10341	9.24053	9.06872	9.16982	8.70053	8.0535	8.4956	8.46977	598	627	369	263	325	333	7.24953	7.41798	4.7158	1.92527	3.61289	3.46086	23.5724	23.1381	15.8024	6.29937	11.4331	11.4195
394198	NM_205569	fosab	v-fos FBJ murine osteosarcoma viral oncogene homolog Ab	protein_coding	NP_991132.1	ZDB-GENE-031222-4	.	2.01291	1028.47	0.249234	4.04955	5.13169e-05	0.000453908	10.4247	9.41449	9.76585	9.37966	9.70934	9.93292	10.3653	10.3053	737	416	653	1458	1601	1587	19.2614	10.622	17.9917	23.0287	38.3848	35.6391	62.6299	33.132	60.2894	75.3483	121.47	117.596
399646	NM_001007287,XM_009291101	fhl1a	four and a half LIM domains 1a	protein_coding	NP_001007288.1;XP_009289376.1	ZDB-GENE-040206-1	.	-2.10517	107.368	0.329934	-3.25501	0.00113388	0.00626714	6.10824	7.18734	6.89862	7.18735	6.57004	6.51265	6.40816	6.26294	130	175	78	122	69	57	4.43126	5.39632	2.70577	2.41907	2.10617	1.68934	14.4086	16.8321	9.06693	7.91503	6.66507	5.57418
399650	NR_125779	si:dkey-85k7.7	si:dkey-85k7.7	lncRNA	.	ZDB-GENE-040128-7	.	8.489	1535.67	0.282075	10.9389	7.50839e-28	1.36885e-25	11.4241	8.33786	9.20193	9.11998	9.09115	10.392	11.2487	10.8751	326	268	260	2374	3893	2823	5.91328	4.75045	4.98147	26.0743	64.9167	44.0937	19.2275	14.8175	16.6927	85.3135	205.431	145.493
402785	NM_203420	bicc2	bicaudal C homolog 2	protein_coding	NP_981965.1	ZDB-GENE-110110-3	.	3.9658	423.089	0.295397	6.7286	1.71297e-11	6.26572e-10	9.40012	7.41392	7.73899	8.24599	7.67194	9.09631	8.93975	9.00753	117	230	99	1086	614	701	1.72616	3.31377	1.5409	9.69187	8.31712	8.89622	5.61273	10.3363	5.1635	31.7112	26.3199	29.3541
402794	NM_001305613	enkur	enkurin, TRPC channel interacting protein	protein_coding	NP_001292542.1	ZDB-GENE-070718-1	.	2.47649	59.4957	0.318088	4.113	3.90553e-05	0.000362276	6.40707	5.09288	5.58677	5.59109	5.454	5.96101	6.21515	6.03786	34	32	24	105	102	84	1.31931	1.23259	1.00373	2.50889	3.67966	2.84447	4.28984	3.84469	3.36346	8.20894	11.6444	9.38565
402797	NM_001118894	sycp1	synaptonemal complex protein 1	protein_coding	NP_001112366.1	ZDB-GENE-040910-6	.	-2.15308	86.2181	0.309896	-3.57023	0.000356671	0.00238907	5.76617	6.88279	6.33937	6.69939	6.72013	6.22289	6.05475	5.98978	74	115	120	100	50	47	0.907199	1.37211	1.54936	0.738534	0.563583	0.487061	2.94982	4.27986	5.19185	2.41643	1.78348	1.60711
402806	NM_205573,XM_021469917	pvalb6	parvalbumin 6	protein_coding	NP_991136.1;XP_021325592.1	ZDB-GENE-040912-95	.	-2.21248	170.067	0.233302	-4.91066	9.07703e-07	1.31137e-05	6.73003	7.87024	7.76297	7.45832	7.60338	6.92666	7.04491	7.1102	255	164	200	134	107	125	11.2126	7.03666	9.28552	3.5609	4.3024	4.73093	36.4587	21.9487	31.1154	11.651	13.6151	15.6103
402807	NM_205574,XM_005161792	pvalb7	parvalbumin 7	protein_coding	NP_991137.2;XP_005161849.1	ZDB-GENE-040718-285	.	-3.36134	81.6463	0.280977	-6.22483	4.82068e-10	1.38941e-08	5.22095	6.97724	6.59871	6.62231	6.48899	5.86391	5.85776	5.66838	119	115	98	63	41	29	5.23618	5.32373	4.61311	1.55679	1.57517	1.02502	17.0258	16.6057	15.4583	5.09371	4.98468	3.38219
402809	NM_205575	tnni2a.3	troponin I type 2a (skeletal, fast), tandem duplicate 3	protein_coding	NP_991138.2	ZDB-GENE-040718-80	.	-2.94988	255.337	0.265907	-5.86918	4.37967e-09	1.05678e-07	7.01076	8.57636	8.15798	8.51733	8.00578	7.53443	7.28879	7.39743	313	441	248	228	105	132	16.889	23.2774	14.0951	7.41002	5.18999	6.11756	54.9157	72.6067	47.232	24.2451	16.4239	20.1856
402815	NM_001130592	nr1d2a	nuclear receptor subfamily 1, group D, member 2a	protein_coding	NP_001124064.2	ZDB-GENE-040504-1	.	-2.18904	3505.59	0.165752	-6.81922	9.15391e-12	3.49874e-10	11.1027	12.2324	12.0925	12.0107	11.9411	11.23	11.4674	11.3429	4774	4083	3839	2774	2512	2278	52.5938	43.961	44.6166	18.4639	25.3779	21.56	171.013	137.122	149.508	60.4129	80.3093	71.1397
402826	NM_001166353	si:ch73-71d17.1	si:ch73-71d17.1	protein_coding	NP_001159825.2	ZDB-GENE-160728-110	.	-2.20622	24.1472	0.518638	-2.20111	0.0277285	0.082283	3.92696	5.04808	4.87829	4.47033	4.62195	4.24231	4.52804	4.24596	44	18	26	16	24	11	1.08349	0.428937	0.674663	0.234923	0.547183	0.22751	3.52303	1.33794	2.26077	0.768654	1.73158	0.750696
402827	NM_001083542,XM_009292778	hao1	hydroxyacid oxidase (glycolate oxidase) 1	protein_coding	NP_001077011.1;XP_009291053.1	ZDB-GENE-060519-2	.	2.42413	122.594	0.279017	4.57846	4.68411e-06	5.65416e-05	7.44087	6.15861	6.47715	6.48745	6.60997	6.8845	7.30219	7.21143	60	57	71	181	208	197	2.04804	1.89484	2.61177	3.75242	6.57487	5.83494	6.65935	5.91037	8.75192	12.2777	20.8064	19.2531
402837	NM_001289794,NM_205583,XM_005170767	hamp	hepcidin antimicrobial peptide	protein_coding	NP_001276723.1;NP_991146.1;XP_005170824.1	ZDB-GENE-050726-1	.	2.81162	30.2856	0.5255	2.83807	0.00453879	0.0198365	5.48355	3.98455	4.71208	4.61213	4.37938	4.85071	4.86675	5.33314	21	15	6	46	32	74	1.15976	0.757192	0.301963	1.70945	1.7459	3.82073	3.77106	2.36182	1.01187	5.59321	5.52496	12.607
402843	NM_205585	sfrp1a	secreted frizzled-related protein 1a	protein_coding	NP_991148.1	ZDB-GENE-040310-5	.	-2.07536	114.138	0.328679	-3.20482	0.00135146	0.00729253	6.22172	7.26344	6.9584	7.12452	6.91789	6.14758	6.65781	6.61201	132	153	119	59	94	93	3.79466	4.29119	3.60285	1.02215	2.45763	2.28276	12.3386	13.385	12.073	3.34442	7.77725	7.53223
402848	NM_214725,XM_021467128	asb2b	ankyrin repeat and SOCS box containing 2b	protein_coding	NP_999890.1;XP_021322803.1	ZDB-GENE-040426-20	.	2.09546	636.748	0.211174	5.05396	4.32752e-07	6.76551e-06	9.75154	8.68473	8.70657	9.07635	8.96841	9.51896	9.6271	9.45686	277	425	376	1245	944	824	5.41933	8.12142	7.74775	14.8108	16.9348	14.0235	17.6213	25.3322	25.9624	48.46	53.5907	46.2722
402854	NM_001172565	ak7a	adenylate kinase 7a	protein_coding	NP_001166036.1	ZDB-GENE-040724-122	.	2.28996	353.692	0.190239	6.28327	3.3152e-10	9.75078e-09	8.94297	7.74972	7.90542	8.10178	8.11183	8.77689	8.65764	8.66404	161	199	205	791	463	494	3.27164	3.96718	4.40667	9.7542	8.66503	8.65829	10.638	12.3744	14.7666	31.9151	27.4208	28.5691
402880	XM_001333951	cox4i1l	cytochrome c oxidase subunit IV isoform 1, like	protein_coding	XP_001333987.2	ZDB-GENE-130814-2	.	5.08024	34.4973	0.489648	4.78894	1.67661e-06	2.27621e-05	5.84792	3.51066	4.51572	4.4813	4.65527	5.51753	5.28526	4.95793	9	7	14	119	58	35	0.490389	0.373193	0.809082	3.95648	2.9096	1.61344	1.59453	1.16406	2.7112	12.9454	9.20755	5.32374
402891	NM_205599	mmgt1	membrane magnesium transporter 1	protein_coding	NP_991162.1	ZDB-GENE-040801-65	.	-2.10643	247.705	0.197695	-5.43666	5.42875e-08	1.04093e-06	7.31967	8.39085	8.27528	8.04566	8.15263	7.52221	7.64959	7.58734	350	249	288	215	172	167	13.8882	9.65962	12.0636	5.1453	6.25073	5.70158	45.1586	30.1301	40.4247	16.8351	19.7807	18.813
402894	NM_205602	smim14	small integral membrane protein 14	protein_coding	NP_991165.1	ZDB-GENE-040426-22	.	-2.75134	130.252	0.28415	-5.1386	2.76786e-07	4.57742e-06	6.12802	7.57414	7.2382	7.22252	7.27843	6.26761	6.69754	6.59234	172	158	172	64	89	80	4.00718	3.60468	4.24322	0.895859	1.89676	1.60862	13.0296	11.2437	14.2189	2.9312	6.00236	5.30785
402910	NM_205617,XM_009294529,XM_009294530	cfap206	cilia and flagella associated protein 206	protein_coding	NP_991180.1;XP_009292804.1;XP_009292805.1	ZDB-GENE-050522-460	.	2.71537	42.9843	0.36106	3.99144	6.5674e-05	0.000566503	5.97304	4.53314	5.07794	5.06739	5.0995	5.65268	5.70223	5.41767	21	19	21	100	73	49	0.411264	0.355268	0.456909	1.26723	1.40335	0.887701	1.33725	1.10815	1.53108	4.14629	4.44095	2.92908
402914	NM_205619	her12	hairy-related 12	protein_coding	NP_991182.1	ZDB-GENE-040824-5	.	3.2167	128.999	0.311343	5.4139	6.16662e-08	1.16876e-06	7.62043	5.93591	6.24915	6.69817	6.30041	7.12834	7.29042	7.32842	39	80	41	248	204	226	1.63513	3.27556	1.7781	6.29639	7.83406	8.15827	5.31675	10.2171	5.95833	20.6014	24.7912	26.9192
402915	NM_205620,XM_021478222,XM_021478223,XM_021478224	sult1st4	sulfotransferase family 1, cytosolic sulfotransferase 4	protein_coding	NP_991183.1;XP_021333897.1;XP_021333898.1;XP_021333899.1	ZDB-GENE-040426-2054	.	2.0992	21.3566	0.52071	2.05458	0.0399195	0.108404	4.85759	3.77831	4.13259	4.17695	4.33756	4.33799	4.70201	4.43379	9	10	17	29	42	26	0.267149	0.312827	0.571681	0.530877	1.25229	0.680308	0.868652	0.975765	1.91568	1.737	3.96291	2.24476
402921	NM_205626,XM_005173943	bcor	BCL6 corepressor	protein_coding	NP_991189.1;XP_005174000.1	ZDB-GENE-040408-1	.	2.00296	8472.76	0.126353	7.93122	2.16996e-15	1.37317e-13	13.4643	12.4623	12.6992	12.6559	12.6884	13.3125	13.2129	13.2935	5266	4668	4940	17394	10440	12097	34.7951	30.2478	34.4057	69.8202	63.4815	68.5956	113.139	94.3486	115.292	228.447	200.89	226.339
402928	NM_205632,XM_009296258,XM_021468395	zgc:77358	zgc:77358	protein_coding	NP_991195.1;XP_009294533.1;XP_021324070.1	ZDB-GENE-040426-1824	.	4.43785	14.3838	0.765332	2.80906	0.00496869	0.0213378	4.5513	2.41171	3.4669	3.44529	3.56902	4.15548	3.97771	3.49979	4	3	7	55	27	6	0.148461	0.075347	0.244789	1.268	0.946448	0.196064	0.482731	0.235022	0.820278	4.1488	2.99507	0.646936
402933	NM_001320403,NM_205637,XR_002459336	rgl1	ral guanine nucleotide dissociation stimulator-like 1	protein_coding	NP_001307332.1;NP_991200.2	ZDB-GENE-040426-1816	.	2.06346	1883.43	0.186994	5.58875	2.28711e-08	4.74592e-07	11.309	10.264	10.4321	10.6733	10.347	11.095	11.1575	11.0617	1037	1312	882	3697	2658	2530	10.0028	12.3224	8.95268	21.551	23.4061	20.8681	32.5248	38.4359	30.0001	70.5135	74.0696	68.8568
402939	NM_205642,XM_005157313	zgc:77938	zgc:77938	protein_coding	NP_991205.1;XP_005157370.1	ZDB-GENE-040426-1910	.	-4.98874	55.3136	0.373245	-6.21221	5.22437e-10	1.49824e-08	4.21671	6.52409	5.89592	5.96081	6.09183	5.06086	5.2838	4.94304	74	76	92	25	28	11	1.8103	1.80416	2.35879	0.358515	0.615262	0.227946	5.88633	5.62752	7.90422	1.17304	1.94702	0.752134
402940	NM_205643	pnp4b	purine nucleoside phosphorylase 4b	protein_coding	NP_991206.1	ZDB-GENE-040426-1887	.	-4.09362	42.0269	0.355798	-5.71498	1.09718e-08	2.42573e-07	4.04394	6.07807	5.55399	5.48978	5.66198	4.86207	4.90325	4.82186	60	51	67	25	18	15	2.14855	1.75997	2.51133	0.536036	0.563792	0.458614	6.98618	5.48967	8.41537	1.75388	1.78414	1.51325
402944	NM_205647,XM_005155743	zgc:77929	zgc:77929	protein_coding	NP_991210.1;XP_005155800.1	ZDB-GENE-040426-1908	.	-2.24152	50.4931	0.354632	-3.28363	0.0010248	0.00576128	4.96736	6.12313	5.73211	5.98589	5.65721	5.23476	5.3254	5.47646	57	78	48	36	29	42	1.64113	2.19516	1.49858	0.625564	0.799167	1.02109	5.33626	6.84713	5.02168	2.0468	2.52899	3.36922
402945	NM_205648	dhrs13l1	dehydrogenase/reductase (SDR family) member 13 like 1	protein_coding	NP_991211.1	ZDB-GENE-040426-1907	.	2.96267	266.841	0.255174	6.1405	8.2263e-10	2.2767e-08	8.64055	7.0725	7.4859	7.33906	7.59901	8.27365	8.54661	8.08789	124	92	139	557	510	318	3.57229	2.58297	4.23678	9.72207	13.501	7.88255	11.6156	8.05676	14.1973	31.81	42.7244	26.0094
402953	NM_205655	pnp6	purine nucleoside phosphorylase 6	protein_coding	NP_991218.2	ZDB-GENE-040426-1800	.	-2.1171	258.032	0.231107	-4.68221	2.83797e-06	3.61569e-05	7.37265	8.4526	8.26378	7.9755	8.37775	7.58971	7.72943	7.58559	337	222	366	229	186	161	8.08748	5.21019	9.27186	3.32795	4.08943	3.31433	26.297	16.2516	31.0696	10.8888	12.9412	10.936
402956	NM_205658	emc4	ER membrane protein complex subunit 4	protein_coding	NP_991221.1	ZDB-GENE-040426-1891	.	-2.13234	69.8668	0.28017	-3.8992	9.65126e-05	0.000785011	5.48311	6.56994	6.24446	6.28973	6.33751	5.77777	5.93681	5.74444	81	81	88	61	54	40	6.73233	6.55966	7.76301	3.05377	4.11347	2.82241	21.8907	20.4608	26.0135	9.99175	13.0172	9.31287
402976	NM_001139458,XM_021469770	si:dkey-194e6.1	si:dkey-194e6.1	protein_coding	NP_001132930.1;XP_021325445.1	ZDB-GENE-100922-43	.	-3.74116	28.2952	0.466271	-4.08236	4.45816e-05	0.000403978	3.60476	5.47329	4.9164	4.85691	5.07138	4.22983	4.45024	4.49281	38	32	47	9	14	17	0.865349	0.704723	1.16013	0.116954	0.287708	0.317103	2.81374	2.19816	3.88754	0.382665	0.910461	1.04632
402981	NM_205681,XM_005163743,XM_005163744,XM_021469936,XM_021469942	amdhd2	amidohydrolase domain containing 2	protein_coding	NP_991244.1;XP_005163800.1;XP_005163801.1;XP_021325611.1;XP_021325617.1	ZDB-GENE-040426-1871	.	2.60929	366.893	0.20817	6.64676	2.99617e-11	1.05076e-09	9.05077	7.66852	7.98682	8.16049	7.86957	8.86809	8.77117	8.67391	179	213	143	869	523	495	3.98476	5.13172	3.70536	11.9861	11.3514	10.4872	12.9567	16.0068	12.4165	39.2178	35.9219	34.6037
402990	NM_205690,XM_005163003	rlbp1b	retinaldehyde binding protein 1b	protein_coding	NP_991253.1;XP_005163060.1	ZDB-GENE-040426-1870	.	-2.92018	419.919	0.292322	-5.28888	1.2307e-07	2.17633e-06	7.74479	9.28851	8.73662	9.30348	8.77165	7.9583	8.323	8.00512	436	769	432	255	283	193	13.469	23.3932	13.9054	4.72142	8.04489	5.03041	43.7955	72.9677	46.5965	15.4482	25.4583	16.5985
402991	NM_205691	gadd45ga	growth arrest and DNA-damage-inducible, gamma a	protein_coding	NP_991254.1	ZDB-GENE-040426-1882	.	4.02737	884.892	0.163507	12.292	9.99537e-35	2.9169e-32	10.4695	8.45917	9.05244	8.85814	8.95894	10.1385	10.0833	10.0876	366	259	305	2170	1372	1460	14.5971	10.1024	12.8423	52.3592	50.2578	50.0711	47.4635	31.5111	43.0338	171.316	159.043	165.215
402998	NM_205697	plxnd1	plexin D1	protein_coding	NP_991260.2	ZDB-GENE-040426-1828	.	2.07905	1037.85	0.236561	4.46365	8.0575e-06	9.13568e-05	10.4526	9.39735	9.46343	9.89071	9.46896	10.3595	10.1969	10.1523	495	798	474	2359	1320	1329	8.91711	14.0511	8.99424	25.677	21.8125	20.5571	28.9946	43.828	30.1393	84.0134	69.0264	67.8306
403001	NM_205700	cfl2	cofilin 2 (muscle)	protein_coding	NP_991263.1	ZDB-GENE-040426-1815	.	-3.32296	425.686	0.351689	-4.92614	8.38678e-07	1.22865e-05	7.62353	9.35352	8.91762	9.40457	8.43051	7.77105	8.13609	8.11887	550	872	294	200	228	236	8.73413	13.5512	4.91594	1.91326	3.32405	3.21858	28.3997	42.2687	16.4731	6.26008	10.5191	10.6201
403010	NM_001256191	nr0b2a	nuclear receptor subfamily 0, group B, member 2a	protein_coding	NP_001243120.1	ZDB-GENE-080403-1	.	2.30167	133.569	0.28459	4.22602	2.37865e-05	0.000234809	7.5418	6.33621	6.65544	6.52784	6.80933	7.15424	7.49227	7.10553	72	54	87	238	243	159	1.02447	0.752332	1.30515	2.06058	3.19463	1.96055	3.33115	2.34666	4.37352	6.7421	10.1095	6.46908
403013	NM_205710,XM_005156059	irf9	interferon regulatory factor 9	protein_coding	NP_991273.2;XP_005156116.1	ZDB-GENE-040912-165	.	2.6038	218.702	0.194317	7.10499	1.20332e-12	5.30545e-11	8.30392	6.92332	7.22744	7.37574	7.27354	7.97575	8.03835	8.04133	100	117	102	442	320	340	2.41776	2.75184	2.60446	6.50411	7.12008	7.08343	7.86153	8.58351	8.72744	21.281	22.5318	23.3726
403019	NM_207184,NM_207185	irx1a	iroquois homeobox 1a	protein_coding	NP_997067.1;NP_997068.1	ZDB-GENE-040707-1	.	2.11607	770.898	0.17753	6.09128	1.12009e-09	3.04492e-08	10.0319	8.95104	9.23935	9.07729	9.27052	9.91278	9.7067	9.82617	476	359	471	1715	911	1106	12.152	8.94265	12.652	26.4134	21.2758	24.2222	39.5131	27.8938	42.3964	86.4229	67.3282	79.924
403032	NM_205720	tes	testis derived transcript (3 LIM domains)	protein_coding	NP_991283.2	ZDB-GENE-040718-59	.	2.02812	292.469	0.268078	3.80541	0.000141571	0.00108149	8.6131	7.59526	7.6218	8.09581	7.72987	8.5354	8.37566	8.24505	129	233	144	681	380	344	2.72296	4.81943	3.19351	8.69907	7.37426	6.24818	8.85389	15.0327	10.7013	28.4628	23.3361	20.6166
403039	NM_001126463	igfbp5b	insulin-like growth factor binding protein 5b	protein_coding	NP_001119935.1	ZDB-GENE-040319-2	.	-3.43141	1928.43	0.257779	-6.90049	5.18248e-12	2.08124e-10	9.76597	11.5441	11.1746	11.5042	10.8412	10.0115	10.2634	10.2164	2630	3491	1726	1033	974	970	19.136	24.8249	13.2472	4.53803	6.49815	6.06158	62.222	77.4334	44.3907	14.8482	20.5636	20.0009
403045	NM_205731,XM_005157314,XM_021480997,XM_021480998,XR_002459910	egf	epidermal growth factor	protein_coding	NP_991294.1;XP_005157371.1;XP_021336672.1;XP_021336673.1	ZDB-GENE-070922-1	.	-2.0721	834.07	0.189847	-5.53653	3.08514e-08	6.18402e-07	9.08425	10.1362	9.75552	10.1133	9.87767	9.36177	9.2988	9.30154	844	1184	924	844	521	554	6.21806	10.1811	7.58601	4.55147	3.48754	4.70146	20.2185	31.7566	25.4204	14.8921	11.0365	15.513
403061	NM_001139464	ela2	elastase 2	protein_coding	NP_001132936.1	ZDB-GENE-041117-1	.	-10.5156	110.035	0.388232	-8.7434	2.26197e-18	1.91733e-16	4.28671	7.64783	7.17596	6.71517	7.0801	5.33862	5.77416	5.44964	221	121	189	16	33	15	10.9068	5.79796	9.81441	0.455055	1.46833	0.60891	35.4642	18.0849	32.8877	1.48891	4.6466	2.00917
403084	XM_002662240	tab1	TGF-beta activated kinase 1/MAP3K7 binding protein 1	protein_coding	XP_002662286.4	ZDB-GENE-060628-1	.	2.3495	454.75	0.174546	7.06035	1.66078e-12	7.14415e-11	9.31678	8.08628	8.34252	8.43661	8.37311	9.18634	9.0228	8.99749	234	249	232	1069	596	613	7.39612	7.70612	7.71776	20.4396	17.2886	16.6519	24.049	24.0368	25.8619	66.877	54.7105	54.9448
403114	NM_001130135	adm2a	adrenomedullin 2a	protein_coding	NP_001123607.1	ZDB-GENE-041210-100	.	2.98411	47.3613	0.386888	4.0769	4.56405e-05	0.000412596	6.15067	4.56543	5.31908	4.94276	5.18967	5.68082	5.79089	5.77078	31	10	22	94	75	77	0.74992	0.235135	0.56394	1.3981	1.68741	1.62376	2.43842	0.733431	1.88974	4.57451	5.33987	5.3578
403131	NM_001131051,XM_009307228	tlr4ba	toll-like receptor 4b, duplicate a	protein_coding	NP_001124523.1;XP_009305503.1	ZDB-GENE-040219-8	.	-2.43512	126.186	0.336429	-3.81653	0.000135342	0.00104187	6.20645	7.47998	7.27398	6.93238	7.28288	6.22203	6.60048	6.7488	184	111	177	61	79	105	2.18032	1.21567	2.07484	0.64981	0.821437	1.01203	7.08949	3.7919	6.95271	2.12614	2.59947	3.3393
403135	NM_001128675	tlr22	toll-like receptor 22	protein_coding	NP_001122147.2	ZDB-GENE-040220-5	.	4.15702	14.6771	0.621322	3.30835	0.000938478	0.00535863	4.56371	2.51228	3.55667	3.53604	3.68386	4.04788	4.0522	3.86265	4	3	8	39	27	18	0.042946	0.032969	0.113189	0.334175	0.342525	0.20992	0.139643	0.102838	0.379292	1.0934	1.08393	0.692657
403138	XM_001919017	tlr5a	toll-like receptor 5a	protein_coding	XP_001919052.2	ZDB-GENE-040219-14	.	2.14179	90.0265	0.263404	4.17161	3.02449e-05	0.000289361	6.94094	5.83763	6.23489	6.13005	6.15634	6.60614	6.80553	6.60705	58	45	48	164	144	117	0.726194	0.548356	0.629203	1.24182	1.65836	1.26038	2.36127	1.71043	2.10843	4.06316	5.24793	4.15877
404035	NM_212817	traf4b	tnf receptor-associated factor 4b	protein_coding	NP_997982.1	ZDB-GENE-040305-2	.	2.12126	52.6668	0.381454	2.84417	0.00445275	0.0195161	6.16049	5.07908	5.36259	5.22772	5.67749	5.96412	5.80025	5.83063	26	17	46	121	64	71	0.635951	0.406391	1.20139	1.81219	1.46118	1.50322	2.06784	1.26761	4.0258	5.92938	4.62396	4.96004
404040	NM_001327871,NM_001327872,NM_205757,XM_005171819,XM_021476051	dab2	Dab, mitogen-responsive phosphoprotein, homolog 2 (Drosophila)	protein_coding	NP_001314800.1;NP_001314801.1;NP_991320.2;XP_005171876.1;XP_021331726.1	ZDB-GENE-040303-1	.	-2.26058	92.1596	0.281959	-4.17328	3.00242e-05	0.000287489	5.8276	6.99467	6.83434	6.69517	6.58162	6.02594	6.16168	6.30307	137	107	93	65	55	74	2.11154	1.8875	1.33279	0.532498	0.679981	1.12721	6.86582	5.88748	4.46613	1.7423	2.15183	3.71936
404621	NM_207089,XM_005155442	loxa	lysyl oxidase a	protein_coding	NP_996972.1;XP_005155499.1	ZDB-GENE-040426-2398	.	-3.17166	65.5125	0.43207	-3.8541	0.000116157	0.000914719	4.97214	6.63861	5.91227	6.61926	5.88865	5.46591	5.37365	5.63436	60	145	55	44	23	43	1.36333	3.33159	1.34362	0.605234	0.468803	0.841428	4.43298	10.3918	4.5024	1.98029	1.48354	2.77639
404629	NM_207097	nbl1	neuroblastoma 1, DAN family BMP antagonist	protein_coding	NP_996980.1	ZDB-GENE-040426-2357	.	-2.73055	34.5903	0.413312	-3.50629	0.000454397	0.00292544	4.22093	5.65915	5.1784	5.1263	5.41026	4.71214	4.90896	4.66291	41	35	57	24	26	14	1.86001	1.57148	2.74902	0.662228	1.07406	0.52001	6.04797	4.90173	9.21184	2.16677	3.39892	1.71583
404725	NM_212825	cx30.3	connexin 30.3	protein_coding	NP_997990.2	ZDB-GENE-040406-1	.	-2.07646	120.427	0.333148	-3.16413	0.00155546	0.00820448	6.28839	7.346	6.8961	7.38175	6.88735	6.66038	6.67127	6.32515	116	201	109	134	91	54	2.2761	3.85638	2.25048	1.58428	1.63743	0.898448	7.4009	12.0288	7.54127	5.18365	5.1817	2.96454
404729	NM_001007213,XM_005167687,XM_021478635	gja5a	gap junction protein, alpha 5a	protein_coding	NP_001007214.1;XP_005167744.1;XP_021334310.1	ZDB-GENE-040407-3	.	2.74444	25.1079	0.631726	2.30561	0.0211325	0.0666075	5.19964	3.75132	4.20489	4.6337	4.09923	4.83486	4.5505	4.85191	7	25	3	62	24	46	0.241651	0.657447	0.077204	0.711405	0.398727	0.914062	0.785744	2.0507	0.258708	2.32767	1.26179	3.01606
405757	NM_212832	oclna	occludin a	protein_coding	NP_997997.2	ZDB-GENE-040426-2685	.	2.50056	146.812	0.272093	4.85956	1.17649e-06	1.66616e-05	7.71172	6.39219	6.53757	6.78858	6.91788	7.48521	7.4893	7.26955	52	75	93	334	226	182	1.03021	1.45198	1.94715	4.02619	4.13153	3.10881	3.34978	4.52899	6.52482	13.1734	13.0744	10.2579
405764	NM_212838,XM_017358727	blnk	B-cell linker	protein_coding	NP_998003.1;XP_017214216.1	ZDB-GENE-040702-4	.	2.01368	29.1053	0.450145	2.24335	0.0248745	0.0755709	5.28581	4.26301	4.7806	4.5189	4.66717	4.82688	5.12087	4.93225	24	10	17	43	51	38	0.337455	0.136019	0.223661	0.327587	0.686281	0.500132	1.09726	0.424267	0.749478	1.07184	2.17176	1.65024
405770	NM_212844	il1b	interleukin 1, beta	protein_coding	NP_998009.2	ZDB-GENE-040702-2	.	10.4515	110.078	0.396073	8.54802	1.25223e-17	9.91897e-16	7.65155	4.25445	5.79071	5.44567	5.46245	6.72267	7.24682	7.04917	30	10	11	205	255	216	0.749045	0.240216	0.294445	3.17906	5.99324	4.75274	2.43558	0.749278	0.986671	10.4017	18.9658	15.6822
405771	NM_212845,XM_009294595	rhag	Rh-associated glycoprotein	protein_coding	NP_998010.1;XP_009292870.1	ZDB-GENE-030131-8229	.	-2.56166	538.805	0.212925	-6.37352	1.84742e-10	5.68862e-09	8.2414	9.59802	9.28114	9.5386	9.11894	8.5184	8.52273	8.64046	671	837	529	421	283	352	17.4733	21.4875	14.7909	6.85515	6.78898	8.14319	56.8156	67.0235	49.5636	22.4296	21.484	26.8694
405772	NM_212846	hbbe2	hemoglobin beta embryonic-2	protein_coding	NP_998011.1	ZDB-GENE-040702-1	.	-5.67872	145.165	0.392022	-6.39139	1.64382e-10	5.10273e-09	5.43806	7.94824	7.43194	7.79987	6.80888	6.24308	6.03934	6.29149	228	321	100	71	30	54	18.8337	25.8987	8.70479	3.54837	2.27285	3.80616	61.2392	80.7828	29.1694	11.61	7.19251	12.5589
405791	NM_214726	cacna1sb	calcium channel, voltage-dependent, L type, alpha 1S subunit, b	protein_coding	NP_999891.1	ZDB-GENE-051227-1	.	-2.10023	1239.78	0.291435	-3.67336	0.000239384	0.00169294	9.6436	10.714	10.291	10.8985	10.1021	9.78632	9.86497	9.93087	1226	2238	933	1070	793	913	9.19043	16.3913	7.37702	4.84184	5.44759	5.87857	29.8834	51.1275	24.7201	15.8422	17.2391	19.3971
405792	NM_001001405	irx5b	iroquois homeobox 5b	protein_coding	NP_001001405.1	ZDB-GENE-040628-5	.	2.17718	171.365	0.31252	3.59164	0.000328599	0.002224	7.87604	6.75231	7.19996	6.6446	7.18878	7.64417	7.64602	7.56834	124	46	116	356	240	231	4.4314	1.60727	4.37543	7.68527	7.86507	7.09029	14.409	5.01337	14.6619	25.1457	24.8893	23.3953
405805	NM_212869	trib3	tribbles pseudokinase 3	protein_coding	NP_998034.1	ZDB-GENE-040426-2609	.	3.30589	1272.02	0.186465	9.25126	2.21861e-20	2.31654e-18	10.9317	9.20641	9.68212	9.68222	9.4664	10.5954	10.733	10.4923	590	552	416	2829	2202	1795	11.9002	10.883	8.84178	34.5076	40.7651	31.1298	38.6945	33.9462	29.6284	112.907	129.003	102.717
405817	NM_212881	ppm1na	protein phosphatase, Mg2+/Mn2+ dependent, 1Na (putative)	protein_coding	NP_998046.1	ZDB-GENE-040426-2731	.	-4.65793	240.498	0.25292	-8.77626	1.69003e-18	1.44857e-16	6.41381	8.62839	8.24001	7.89877	8.38676	6.94464	7.09144	7.06151	380	240	425	109	92	93	5.668	3.49734	6.68987	0.978224	1.24999	1.18002	18.4299	10.9089	22.4175	3.20069	3.95564	3.89363
405825	NM_001328345,NM_212889	mfap4	microfibrillar-associated protein 4	protein_coding	NP_001315274.1;NP_998054.2	ZDB-GENE-040426-2246	.	2.32039	27.0295	0.421149	2.88346	0.0039333	0.0176345	5.23866	4.027	4.5533	4.53284	4.50435	4.92322	4.75956	4.96941	16	14	13	59	29	46	0.629791	0.541179	0.544227	1.47555	1.08461	1.70911	2.04781	1.68804	1.82368	4.8279	3.4323	5.63941
405830	NM_212894	lgals2a	lectin, galactoside-binding, soluble, 2a	protein_coding	NP_998059.2	ZDB-GENE-050318-2	.	-2.28956	78.082	0.33838	-3.53175	0.000412813	0.00270086	5.56646	6.76521	6.31909	6.7529	6.20727	5.96537	5.94895	5.84788	82	137	66	76	49	43	4.13522	6.73615	3.49309	2.32531	2.23733	1.84325	13.446	21.0113	11.7052	7.60825	7.08012	6.08201
405833	NM_001098198,NM_212897	clic5b	chloride intracellular channel 5b	protein_coding	NP_001091668.1;NP_998062.1	ZDB-GENE-040426-2542	.	-3.54454	363.612	0.189313	-9.64326	5.24945e-22	6.18385e-20	7.32228	9.14768	8.72902	8.94063	8.69483	7.78927	7.8334	7.76121	481	570	440	235	167	159	15.5449	18.2093	14.6866	4.31753	4.7477	4.24441	50.5454	56.7982	49.2141	14.1267	15.0243	14.0049
405838	NM_212902	slc13a3	solute carrier family 13 (sodium-dependent dicarboxylate transporter), member 3	protein_coding	NP_998067.1	ZDB-GENE-040426-2486	.	-6.85936	47.4579	0.513495	-5.41012	6.29808e-08	1.19171e-06	3.60918	6.37004	5.78229	5.81044	5.61089	4.61147	4.57729	5.04899	80	78	60	10	4	27	1.01054	0.958869	0.804689	0.071638	0.039372	0.29439	3.28585	2.99089	2.69648	0.234396	0.124593	0.971376
405862	NM_212926	slc5a2	solute carrier family 5 (sodium/glucose cotransporter), member 2	protein_coding	NP_998091.1	ZDB-GENE-040426-2498	.	-2.16006	35.3601	0.480178	-2.31387	0.0206748	0.0654611	4.47544	5.59916	5.15618	5.54039	4.93436	4.95106	4.68133	4.91987	38	66	23	41	13	27	0.715944	1.21495	0.454662	0.465651	0.217671	0.436345	2.32794	3.78966	1.52355	1.52358	0.688829	1.43977
405865	NM_212929	ethe1	ethylmalonic encephalopathy 1	protein_coding	NP_998094.1	ZDB-GENE-040426-2503	.	2.95573	222.942	0.203767	7.67306	1.6794e-14	9.22904e-13	8.38002	6.8168	7.26162	7.29999	7.16253	8.09458	8.1309	7.95374	106	105	86	509	357	307	3.3271	3.20607	2.84816	9.67533	10.2924	8.28739	10.8183	10.0003	9.54408	31.6571	32.5706	27.3452
405874	NM_212938	aamp	angio-associated, migratory cell protein	protein_coding	NP_998103.1	ZDB-GENE-040426-2370	.	2.03407	839.236	0.189918	5.39374	6.90046e-08	1.29185e-06	10.1359	9.11206	9.28029	9.50922	9.21678	9.98888	9.95788	9.84535	465	583	406	1767	1145	1067	11.2021	13.7447	10.3215	25.7564	25.3212	22.1035	36.4245	42.8724	34.5868	84.2734	80.1299	72.933
405891	NM_212955,XM_005161344,XM_009295473	esrra	estrogen-related receptor alpha	protein_coding	NP_998120.1;XP_005161401.1;XP_009293748.1	ZDB-GENE-990415-68	.	-2.02403	1221.68	0.136106	-7.47381	7.79078e-14	3.96812e-12	9.65874	10.6751	10.5161	10.4619	10.4537	9.84489	9.92412	9.89179	1558	1372	1381	1129	837	851	15.7766	14.0541	15.1499	7.10916	8.29023	7.35922	51.2987	43.8373	50.7668	23.2607	26.2347	24.2826
406202	NM_212968	heg1	heart development protein with EGF-like domains 1	protein_coding	NP_998133.2	ZDB-GENE-040714-1	.	-2.58184	512.823	0.224969	-6.08262	1.18235e-09	3.19903e-08	8.16135	9.53012	9.06958	9.51383	9.12543	8.47561	8.4321	8.54195	545	840	553	418	263	324	5.26706	7.93648	5.63827	2.43782	2.32611	2.69165	17.1262	24.7554	18.8936	7.97639	7.36106	8.88141
406246	NM_001009888	sox21b	SRY (sex determining region Y)-box 21b	protein_coding	NP_001009888.1	ZDB-GENE-040429-1	.	2.00533	289.759	0.229101	4.38166	1.17777e-05	0.000127556	8.59561	7.59	8.04775	7.66717	7.74928	8.34877	8.36236	8.43215	234	129	148	548	374	430	7.61443	4.11552	5.0921	10.8026	11.185	12.0605	24.7589	12.8371	17.0634	35.3453	35.3955	39.795
406280	NM_001327825	itih2	inter-alpha-trypsin inhibitor heavy chain 2	protein_coding	NP_001314754.1	ZDB-GENE-040426-1942	.	2.36621	238.482	0.333836	3.72211	0.000197567	0.00143625	8.39009	7.14448	7.59556	7.13138	7.54617	7.77764	8.42865	8.01565	160	73	142	329	478	314	2.14704	0.960226	2.01438	2.68142	5.91021	3.63767	6.98127	2.99512	6.7501	8.77345	18.7031	12.0029
406298	NM_213025	ndufa4	NADH dehydrogenase (ubiquinone) 1 alpha subcomplex, 4	protein_coding	NP_998190.1	ZDB-GENE-040426-1962	.	-2.3943	673.87	0.216871	-5.80806	6.31996e-09	1.47387e-07	8.63534	9.89193	9.77291	9.54022	9.59854	8.699	9.00576	9.03521	1003	723	785	430	437	481	40.7765	28.74	33.6533	10.5639	16.2718	16.7931	132.588	89.6453	112.771	34.5644	51.4927	55.411
406304	NM_213031	gadd45ba	growth arrest and DNA-damage-inducible, beta a	protein_coding	NP_998196.1	ZDB-GENE-040426-1971	.	2.70372	1442.55	0.147801	9.70865	2.76971e-22	3.4206e-20	11.0405	9.60523	9.96848	9.8829	9.9604	10.7578	10.8525	10.6967	740	618	696	3060	2277	2032	25.1488	20.5135	24.9498	62.8282	70.9697	59.3144	81.7733	63.9853	83.6057	205.57	224.586	195.715
406311	NM_001291329,NM_213038	pik3r3a	phosphoinositide-3-kinase, regulatory subunit 3a (gamma)	protein_coding	NP_001278258.1;NP_998203.2	ZDB-GENE-040426-1978	.	-3.23738	710.995	0.187256	-9.05085	1.41864e-19	1.37501e-17	8.39065	10.0853	9.71066	9.93989	9.61305	8.77821	8.76855	8.85162	935	1124	797	481	317	377	12.2671	14.4172	11.0244	3.80954	3.83029	4.26454	39.8872	44.97	36.9422	12.4646	12.1211	14.0713
406319	NM_213046,XM_021470031	snn	stannin	protein_coding	NP_998211.1;XP_021325706.1	ZDB-GENE-040426-1987	.	-2.10722	205.854	0.25456	-4.2243	2.39682e-05	0.000236298	7.05376	8.12333	7.91846	7.66872	8.03398	7.1321	7.36642	7.43752	265	182	289	148	140	164	7.69878	5.2122	9.13624	2.58262	3.83105	4.22436	25.0331	16.2578	30.6151	8.45018	12.1235	13.9388
406327	NM_213054	fgg	fibrinogen gamma chain	protein_coding	NP_998219.1	ZDB-GENE-040426-1998	.	3.48259	265.152	0.312779	5.75537	8.645e-09	1.96813e-07	8.68699	6.88465	7.36826	7.081	7.56199	8.0316	8.58773	8.26016	110	63	139	434	550	404	3.07414	1.70294	4.07628	7.31569	14.1035	9.69836	9.9958	5.3118	13.6594	23.9365	44.631	32.0009
406338	NM_213249	chia.2	chitinase, acidic.2	protein_coding	NP_998414.1	ZDB-GENE-040426-2014	.	-5.15213	175.254	0.351615	-6.72658	1.73692e-11	6.33315e-10	5.82095	8.19957	7.72543	7.34714	7.9822	6.74292	6.27547	6.494	271	162	343	122	33	56	6.81621	3.98354	9.0883	1.84448	0.74779	1.20676	22.1634	12.4254	30.4545	6.03502	2.36641	3.98185
406339	NM_213066	hk2	hexokinase 2	protein_coding	NP_998231.1	ZDB-GENE-040426-2017	.	2.3342	570.653	0.29338	4.16843	3.06711e-05	0.000292829	9.64174	8.41987	8.35303	9.00365	8.61477	9.51112	9.43144	9.1955	192	435	267	1351	830	671	2.63128	5.83345	3.85211	11.1963	10.4481	7.90608	8.55581	18.1956	12.9083	36.6335	33.0633	26.087
406342	NM_213069	tcirg1b	T-cell, immune regulator 1, ATPase, H+ transporting, lysosomal V0 subunit A3b	protein_coding	NP_998234.1	ZDB-GENE-040426-2022	.	2.18168	485.434	0.16481	6.82869	8.56948e-12	3.2918e-10	9.37836	8.25426	8.47231	8.60049	8.49246	9.21851	9.12302	9.11846	260	289	254	1055	635	669	3.90778	4.25009	4.03729	9.61025	8.77748	8.66793	12.7064	13.2568	13.5288	31.4441	27.7767	28.6009
406351	NM_213078	ripk4	receptor-interacting serine-threonine kinase 4	protein_coding	NP_998243.1	ZDB-GENE-040426-2042	.	2.5232	152.133	0.238931	5.58845	2.29099e-08	4.74968e-07	7.76759	6.43221	6.70084	6.73239	6.96867	7.44474	7.54428	7.43964	66	65	96	308	234	218	0.808447	0.772587	1.24056	2.27899	2.62362	2.28804	2.62872	2.40984	4.15706	7.45672	8.30254	7.54965
406356	NM_213083,XM_021469451	tmem41ab	transmembrane protein 41ab	protein_coding	NP_998248.1;XP_021325126.1	ZDB-GENE-040426-2050	.	-8.57374	64.5901	0.530928	-5.83869	5.2613e-09	1.24595e-07	3.72934	6.85695	5.97451	6.66023	5.55679	5.10197	4.91112	4.81885	83	177	43	31	11	8	1.94858	4.21135	1.05391	0.440736	0.226909	0.156043	6.33595	13.136	3.53162	1.44206	0.718062	0.514882
406384	NM_213110	gmfb	glia maturation factor, beta	protein_coding	NP_998275.1	ZDB-GENE-040426-2114	.	-2.07512	688.236	0.218181	-4.82716	1.38495e-06	1.93868e-05	8.80784	9.85848	9.81455	9.51531	9.58138	8.84726	9.17811	9.07725	1024	683	749	508	526	490	23.5305	15.3441	18.1462	7.05094	11.0806	9.6737	76.5111	47.8612	60.8073	23.0702	35.065	31.9195
406397	NM_213123	mmp9	matrix metallopeptidase 9	protein_coding	NP_998288.1	ZDB-GENE-040426-2132	.	12.1651	514.681	0.252857	14.2558	4.12779e-46	2.96311e-43	9.89367	6.28759	7.40309	7.35074	7.40286	9.07607	9.59707	9.14679	74	62	70	1108	1276	850	1.16083	0.959053	1.16256	10.6218	18.5832	11.5883	3.77451	2.99147	3.8957	34.7538	58.8074	38.2371
406436	NM_213157	slc25a33	solute carrier family 25 (pyrimidine nucleotide carrier), member 33	protein_coding	NP_998322.1	ZDB-GENE-040426-2183	.	-2.35357	440.796	0.191727	-6.44067	1.18949e-10	3.77401e-09	8.03684	9.27373	9.07001	9.12991	8.85306	8.40644	8.32111	8.26801	595	596	440	428	255	251	15.3758	15.0462	11.9923	6.67425	6.03103	5.55651	49.9955	46.9319	40.1859	21.8377	19.0854	18.3344
406449	NM_213170	ptges3a	prostaglandin E synthase 3a (cytosolic)	protein_coding	NP_998335.1	ZDB-GENE-040426-2200	.	-2.20129	457.262	0.253496	-4.49059	7.10264e-06	8.19049e-05	8.16114	9.29525	9.17096	8.9427	9.05056	8.1059	8.57735	8.51697	651	469	540	270	347	340	17.5521	12.3458	15.3712	4.39637	8.57842	7.86805	57.072	38.5087	51.5083	14.3847	27.1468	25.9616
406452	NM_001312913	sqstm1	sequestosome 1	protein_coding	NP_001299842.1	ZDB-GENE-040426-2204	.	7.89001	787.416	0.280601	10.6202	2.40139e-26	3.94016e-24	10.4487	7.46962	8.13914	8.55389	8.0611	9.93648	10.0659	9.78142	128	231	105	2064	1585	1246	2.88388	5.10882	2.51198	28.2947	32.9825	24.2944	9.37713	15.9354	8.41753	92.5784	104.374	80.1624
406453	NM_213174	tmem37	transmembrane protein 37	protein_coding	NP_998339.2	ZDB-GENE-040426-2208	.	-4.45949	38.7707	0.440909	-4.89188	9.98749e-07	1.43121e-05	3.84798	5.98052	5.14625	5.61934	5.46748	4.56162	4.7757	4.77324	36	71	58	13	17	18	0.475391	0.924858	0.805704	0.098201	0.20817	0.195109	1.54577	2.88481	2.69988	0.321308	0.658762	0.643786
406454	NM_001017593	epcam	epithelial cell adhesion molecule	protein_coding	NP_001017593.1	ZDB-GENE-040426-2209	.	3.13877	524.038	0.233083	7.07988	1.44283e-12	6.26527e-11	9.63446	7.98453	8.16662	8.3886	8.57139	9.2489	9.45461	9.22499	166	216	282	1088	917	753	5.68467	7.24354	10.2116	22.6016	28.9258	22.2375	18.4841	22.5939	34.2186	73.951	91.5368	73.3752
406468	NM_213187	dhdds	dehydrodolichyl diphosphate synthase	protein_coding	NP_998352.1	ZDB-GENE-040426-2236	.	2.07104	242.477	0.205822	5.10321	3.33943e-07	5.39073e-06	8.35286	7.30396	7.51922	7.49593	7.68487	8.20673	8.15963	8.01535	134	121	161	527	335	298	4.91039	4.32083	6.21878	11.6749	11.2745	9.37868	15.9665	13.4775	20.8389	38.1995	35.6786	30.9461
406471	NM_213190	tnfrsf1a	tumor necrosis factor receptor superfamily, member 1a	protein_coding	NP_998355.1	ZDB-GENE-040426-2252	.	2.23326	373.202	0.218744	5.29911	1.16366e-07	2.07052e-06	9.00972	7.85139	8.03084	8.34155	7.98246	8.78082	8.78578	8.74945	183	261	162	767	518	526	3.19611	4.46703	2.98118	8.12544	8.33446	7.91966	10.3924	13.9335	9.9898	26.5859	26.3747	26.1319
406479	NM_213198,XM_017354989,XM_017354990,XM_017354991,XM_021474979,XM_021474980	orc5	origin recognition complex, subunit 5	protein_coding	NP_998363.1;XP_017210478.1;XP_017210479.1;XP_017210480.1;XP_021330654.1;XP_021330655.1	ZDB-GENE-040426-2275	.	-2.71595	152.463	0.209509	-6.88016	5.97872e-12	2.38019e-10	6.3582	7.80018	7.41538	7.56856	7.47301	6.76003	6.76552	6.76586	186	210	190	121	81	86	2.88969	4.01291	4.30542	1.20934	1.25912	1.1636	9.39603	12.517	14.4273	3.95689	3.98455	3.83944
406483	NM_213202,XM_005159345	gnb3b	guanine nucleotide binding protein (G protein), beta polypeptide 3b	protein_coding	NP_998367.1;XP_005159402.1	ZDB-GENE-040426-2280	.	-6.28609	5135.28	0.313443	-8.46138	2.64226e-17	2.02994e-15	10.4615	13.1132	12.9268	12.0665	12.7507	10.8885	11.3043	11.0326	10836	4081	8616	1536	1872	1356	256.873	94.5589	215.489	22.0194	40.6934	27.644	835.241	294.947	722.096	72.046	128.776	91.2148
406544	NM_213260,XM_021469681	olfm2b	olfactomedin 2b	protein_coding	NP_998425.2;XP_021325356.1	ZDB-GENE-040426-2402	.	-2.626	98.7777	0.362905	-3.83811	0.000123987	0.000966439	5.77549	7.15764	6.72631	6.55665	7.08679	5.95006	6.40855	6.08384	116	86	174	54	80	49	1.98533	1.27245	2.99775	0.491222	1.32679	0.734342	6.45544	3.96901	10.0453	1.60725	4.19868	2.42305
406596	NM_213304	socs3b	suppressor of cytokine signaling 3b	protein_coding	NP_998469.1	ZDB-GENE-040426-2528	.	4.54658	1567.3	0.199816	10.934	7.92902e-28	1.43415e-25	11.3272	9.14254	9.59265	9.84217	9.57167	10.8441	11.0728	10.8764	457	606	421	3432	2936	2525	9.80801	12.7079	9.52173	44.536	57.8301	46.5947	31.8914	39.6382	31.9069	145.719	183.006	153.745
406602	NM_213310,XM_005169814	egln3	egl-9 family hypoxia-inducible factor 3	protein_coding	NP_998475.1;XP_005169871.1	ZDB-GENE-040426-2541	.	7.92816	199.976	0.283111	10.5506	5.04894e-26	8.22548e-24	8.47236	5.48485	6.4691	6.48147	6.42381	7.93941	8.16241	7.61676	42	40	36	528	453	261	0.997147	0.960548	0.923552	7.9934	10.4224	5.62329	3.2423	2.99613	3.09478	26.1539	32.982	18.5547
406605	NM_213313	fam213b	family with sequence similarity 213, member B	protein_coding	NP_998478.1	ZDB-GENE-040426-2556	.	-2.58568	64.0124	0.319865	-4.28475	1.82942e-05	0.00018644	5.1545	6.52994	5.98179	6.37393	6.14059	5.62243	5.54845	5.64121	63	103	76	55	31	40	2.05276	3.30336	2.63997	1.09398	0.908809	1.11401	6.67471	10.3038	8.84643	3.57944	2.87596	3.6758
406645	NM_213336	ctsba	cathepsin Ba	protein_coding	NP_998501.1	ZDB-GENE-040426-2650	.	2.38332	1031.27	0.174064	7.19834	6.095e-13	2.80017e-11	10.5049	9.25145	9.56356	9.58331	9.46858	10.2089	10.411	10.1505	574	551	481	2016	1692	1341	17.318	16.2416	15.2996	36.7316	46.8022	34.7434	56.3108	50.6605	51.2682	120.184	148.107	114.64
406650	NM_213296	timp2b	TIMP metallopeptidase inhibitor 2b	protein_coding	NP_998461.1	ZDB-GENE-040426-2655	.	7.94078	545.102	0.272689	10.9623	5.80366e-28	1.07513e-25	9.91942	6.92875	7.89963	7.86054	7.49978	9.2047	9.5856	9.37455	138	121	63	1158	1163	988	2.05563	1.76566	0.985923	10.4796	15.9785	12.7134	6.68403	5.50741	3.30379	34.2885	50.5645	41.9495
406674	NM_213365,XM_005173245,XM_005173246,XM_005173247,XR_658191	rab41	RAB41, member RAS oncogene family	protein_coding	NP_998530.1;XP_005173302.1;XP_005173303.1;XP_005173304.1	ZDB-GENE-040426-2686	.	-2.03838	975.329	0.21453	-4.78918	1.67467e-06	2.27621e-05	9.32768	10.3533	10.3051	10.0034	10.1106	9.35582	9.70045	9.57464	1423	948	1089	730	764	691	25.0076	16.0948	20.1693	7.76876	12.4184	10.4847	81.3141	50.2028	67.5863	25.4189	39.2986	34.5954
406688	NM_213379	got2a	glutamic-oxaloacetic transaminase 2a, mitochondrial	protein_coding	NP_998544.1	ZDB-GENE-040426-2703	.	-2.19476	339.375	0.195345	-5.80543	6.42023e-09	1.49573e-07	7.73239	8.86447	8.7529	8.49163	8.62899	7.97378	8.09594	7.94534	490	338	404	300	237	204	8.92119	6.01832	7.76224	3.29681	3.95432	3.18508	29.0079	18.7723	26.0109	10.7869	12.5136	10.5095
406707	NM_213398,XM_005159424	vamp1	vesicle-associated membrane protein 1	protein_coding	NP_998563.1;XP_005159481.1	ZDB-GENE-040426-2725	.	-3.90771	1486.58	0.198888	-9.8866	4.75906e-23	6.17629e-21	9.244	11.2087	11.0028	10.8464	10.6737	9.5872	9.83783	9.69894	2543	2015	1696	749	709	622	52.1108	40.6061	36.927	9.94253	13.3348	11.0985	169.442	126.658	123.741	32.5313	42.1986	36.6207
406719	NM_213410,XM_005156810	prdm8	PR domain containing 8	protein_coding	NP_998575.1;XP_005156867.1	ZDB-GENE-040426-2747	.	2.24176	125.081	0.239172	4.86945	1.11912e-06	1.59277e-05	7.43541	6.26805	6.73048	6.47851	6.58681	7.16084	7.2021	7.15275	86	53	65	251	178	177	1.51558	0.91254	1.26441	2.67159	2.95184	2.67745	4.92804	2.84638	4.23698	8.74129	9.3412	8.83458
406734	NM_213425,XM_005170976,XM_005170977,XM_005170978,XM_009293825,XM_009293826,XM_009293837,XM_009293841,XM_021470311,XM_021470376,XM_021470393	agpat3	1-acylglycerol-3-phosphate O-acyltransferase 3	protein_coding	NP_998590.1;XP_005171033.1;XP_005171034.1;XP_005171035.1;XP_009292100.1;XP_009292101.1;XP_009292112.1;XP_009292116.1;XP_021325986.1;XP_021326051.1;XP_021326068.1	ZDB-GENE-040426-2765	.	-2.54159	4390.21	0.179022	-7.51715	5.59845e-14	2.91614e-12	11.2759	12.6213	12.5098	12.201	12.3698	11.4752	11.6599	11.5823	6707	4473	5480	3210	2729	2620	57.7437	41.2681	52.8729	19.7482	26.0126	23.2033	187.758	128.723	177.175	64.6147	82.3177	76.562
406738	NM_213639	cfl1l	cofilin 1 (non-muscle), like	protein_coding	NP_998804.1	ZDB-GENE-040426-2770	.	2.46705	280.975	0.306621	4.24885	2.14874e-05	0.000214603	8.64263	7.34244	7.6542	7.49529	7.79389	8.72365	8.17409	8.06044	148	109	171	884	317	292	5.66746	4.07695	6.91649	20.5616	11.1764	9.66418	18.4281	12.7168	23.1769	67.2762	35.3682	31.8881
406771	NM_213462	cwc25	CWC25 spliceosome-associated protein homolog (S. cerevisiae)	protein_coding	NP_998627.1	ZDB-GENE-040426-2817	.	2.22088	332.09	0.169632	6.78604	1.15251e-11	4.29777e-10	8.83896	7.6883	7.9391	7.95015	8.03336	8.62469	8.62948	8.55995	179	170	194	690	466	455	4.04372	3.76851	4.6455	9.45045	9.68709	8.87116	13.1484	11.7547	15.5669	30.9213	30.6552	29.2714
406802	NM_214774	tspan7	tetraspanin 7	protein_coding	NP_999939.1	ZDB-GENE-030131-5435	.	-2.12186	256.473	0.30949	-3.50683	0.00045348	0.00292199	7.36331	8.44415	8.28806	8.4003	7.82112	7.32706	7.73456	7.72559	353	376	189	159	192	201	7.79202	8.12602	4.39221	2.11803	3.87528	3.81196	25.3363	25.3466	14.7181	6.93006	12.2635	12.578
406811	NM_213490	zgc:55461	zgc:55461	protein_coding	NP_998655.1	ZDB-GENE-040426-2879	.	2.03337	129.493	0.272264	3.76058	0.000169518	0.00126101	7.43861	6.41798	6.52154	6.83485	6.71366	7.28596	7.28503	7.00756	58	90	76	284	191	141	1.59304	2.42772	2.22268	4.74771	4.8531	3.35493	5.1799	7.57252	7.4481	15.5342	15.3578	11.07
406823	NM_213502	eif3jb	eukaryotic translation initiation factor 3, subunit Jb	protein_coding	NP_998667.1	ZDB-GENE-040426-2900	.	-2.08576	433.125	0.219717	-4.827	1.38607e-06	1.93906e-05	8.13458	9.19283	9.14279	9.00364	8.73037	8.27187	8.43346	8.42681	648	518	381	358	298	313	16.1891	12.6386	10.0412	5.40453	6.81806	6.70474	52.64	39.4223	33.6478	17.6833	21.576	22.1231
406844	NM_213523	krt15	keratin 15	protein_coding	NP_998688.2	ZDB-GENE-040426-2931	.	-3.62915	426.293	0.207379	-8.96733	3.03803e-19	2.81397e-17	7.52318	9.38508	8.79124	9.1541	9.09988	8.04303	7.9652	7.9815	467	657	629	291	173	188	13.2455	18.2063	18.8326	4.97792	4.47811	4.55946	43.0687	56.7888	63.1073	16.2874	14.1711	15.0445
406853	NM_213532,XM_005167154	creb3l3l	cAMP responsive element binding protein 3-like 3 like	protein_coding	NP_998697.2;XP_005167211.1	ZDB-GENE-040426-2942	.	2.21296	1554.97	0.141355	8.10709	5.18465e-16	3.43218e-14	11.0647	9.91894	10.1925	10.1185	10.2208	10.9055	10.8219	10.8062	900	765	887	3375	2063	2147	15.6808	13.2633	16.0759	36.1503	33.5246	32.5151	50.9871	41.3708	53.8697	118.281	106.09	107.288
407086	NM_213556,XM_017353483	junba	jun B proto-oncogene a	protein_coding	NP_998721.2;XP_017208972.1	ZDB-GENE-040426-2172	.	9.25597	433.198	0.220223	14.5779	3.88388e-48	3.18631e-45	9.61112	6.39823	7.45738	7.33024	7.28244	8.97096	9.23768	8.96256	92	68	63	1042	927	735	2.71386	1.88039	1.884	18.3367	25.1263	18.6344	8.82431	5.86528	6.3132	59.9965	79.5133	61.4866
407613	NM_214775,XM_005158173,XM_021466671,XM_021466672,XM_021466673	rbfox1l	RNA binding protein, fox-1 homolog (C. elegans) 1-like	protein_coding	NP_999940.1;XP_005158230.1;XP_021322346.1;XP_021322347.1;XP_021322348.1	ZDB-GENE-040923-2	.	-2.179	2828.98	0.252413	-4.4517	8.51932e-06	9.61185e-05	10.7975	11.9212	11.5714	12.0298	11.3754	11.0111	10.9631	11.1186	3081	4751	2339	2553	1609	2074	79.2086	121.493	69.0432	45.903	40.8207	54.0289	257.553	378.96	231.361	150.192	129.179	178.275
407635	XM_682838	ptpn3	protein tyrosine phosphatase, non-receptor type 3	protein_coding	XP_687930.5	ZDB-GENE-030131-2934	.	2.60308	444.3	0.308748	4.47038	7.80809e-06	8.89681e-05	9.32614	7.94678	7.85552	8.59332	8.21973	9.00564	9.07214	9.04257	120	323	200	909	658	674	1.29505	3.42176	2.28611	5.95684	6.54594	6.28184	4.21095	10.6731	7.66064	19.4904	20.7149	20.7277
407651	NM_001128677,XM_005161016,XM_021468801	prlra	prolactin receptor a	protein_coding	NP_001122149.1;XP_005161073.1;XP_021324476.1	ZDB-GENE-080103-2	.	-2.76411	582.045	0.319009	-4.59804	4.26493e-06	5.19457e-05	8.27396	9.73903	9.62694	8.85977	9.64123	8.42047	8.76759	8.57902	964	371	931	356	382	315	6.79409	2.63662	6.93529	1.54285	2.74446	1.99944	22.0915	8.22412	23.2399	5.04811	8.68496	6.59737
407654	NM_214783	mob1bb	MOB kinase activator 1Bb	protein_coding	NP_999948.2	ZDB-GENE-050522-58	.	-3.07344	143.501	0.301222	-5.37761	7.54797e-08	1.40165e-06	6.14353	7.75694	7.24726	7.68479	7.18444	6.45611	6.73245	6.57085	164	259	144	83	87	71	3.71309	5.74194	3.45135	1.13259	1.7943	1.36824	12.0734	17.9102	11.5653	3.70576	5.67813	4.51467
407680	NM_001115105,XM_017353526,XM_021470602	si:zfos-1011f11.1	si:zfos-1011f11.1	protein_coding	NP_001108577.2;XP_017209015.1;XP_021326277.1	ZDB-GENE-080229-4	.	2.97825	275.251	0.278232	5.65881	1.52423e-08	3.26006e-07	8.68676	7.11301	7.30947	7.49317	7.70745	8.38182	8.56298	8.09058	91	114	158	620	511	313	1.39347	1.70632	2.61646	5.98513	7.23036	4.318	4.53097	5.32233	8.76765	19.583	22.8807	14.2478
407691	NM_001128678,XM_005160855	esrrgb	estrogen-related receptor gamma b	protein_coding	NP_001122150.1;XP_005160912.1	ZDB-GENE-040616-4	.	-3.376	97.4633	0.334849	-5.24211	1.58747e-07	2.73876e-06	5.46767	7.23529	6.98106	6.53348	6.91625	6.15859	5.81307	6.04675	166	87	146	85	28	49	3.84658	2.03645	3.55117	1.22965	0.585023	0.951642	12.5074	6.35208	11.8998	4.02334	1.85133	3.14006
407729	NM_001013273	caprin2	caprin family member 2	protein_coding	NP_001013291.1	ZDB-GENE-040812-2	.	2.37562	67.2004	0.290322	4.29973	1.71005e-05	0.000175992	6.56223	5.31837	5.7273	5.81716	5.65055	6.34229	6.19744	6.22729	36	40	29	156	86	95	0.433797	0.472859	0.360344	1.14028	0.953705	0.98858	1.41052	1.47494	1.2075	3.73094	3.01804	3.26194
407983	NM_214814,XM_005156475,XM_005156476	tp53bp2a	tumor protein p53 binding protein, 2a	protein_coding	NP_999979.1;XP_005156532.1;XP_005156533.1	ZDB-GENE-040516-8	.	2.16003	2900.14	0.172022	6.45878	1.05549e-10	3.37684e-09	11.9529	10.8422	11.0121	11.1974	11.0415	11.8751	11.6735	11.6558	1522	1800	1503	6783	3641	3781	13.7372	15.8526	14.2363	36.779	30.0486	29.2065	44.6674	49.4471	47.7051	120.339	95.0901	96.3702
414331	NM_001001730	cyp51	cytochrome P450, family 51	protein_coding	NP_001001730.2	ZDB-GENE-040625-2	.	2.49886	308.468	0.181092	7.29611	2.96209e-13	1.42211e-11	8.78321	7.46246	7.75919	7.85046	7.7854	8.53414	8.58593	8.42374	152	162	150	662	472	414	2.75141	2.85353	2.86225	7.24139	7.83404	6.44149	8.94641	8.90068	9.59127	23.6934	24.7911	21.2545
414844	NM_001001829,XM_005164734	th2	tyrosine hydroxylase 2	protein_coding	NP_001001829.1;XP_005164791.1	ZDB-GENE-050201-1	.	-2.11589	47.2267	0.311787	-3.46797	0.000524415	0.00329766	4.92401	6.00215	5.72277	5.64924	5.74356	5.27295	5.31404	5.30099	60	50	59	43	31	32	1.34777	1.06515	1.35263	0.56231	0.62201	0.593149	4.38239	3.32239	4.53261	1.83984	1.96837	1.95717
415101	NM_001001841	rel	v-rel avian reticuloendotheliosis viral oncogene homolog	protein_coding	NP_001001841.2	ZDB-GENE-040718-255	.	2.09339	172.497	0.227197	4.69125	2.71542e-06	3.48858e-05	7.8669	6.8016	6.9549	7.06321	7.22095	7.59719	7.57455	7.71979	83	92	118	329	215	272	1.7159	1.86976	2.59318	4.13244	4.10248	4.85881	5.57938	5.83213	8.68962	13.5211	12.9825	16.0322
415103	NM_001001843	tph1b	tryptophan hydroxylase 1b	protein_coding	NP_001001843.2	ZDB-GENE-030805-6	.	3.00577	70.7647	0.282588	5.61856	1.9256e-08	4.05005e-07	6.72985	5.14518	5.62763	5.70658	5.74304	6.40409	6.36644	6.31134	28	31	34	165	106	104	0.55667	0.61317	0.727831	2.04188	1.9943	1.8224	1.81005	1.91259	2.43893	6.68091	6.31105	6.01323
415133	NM_001002044,XM_005164203	mafk	v-maf avian musculoaponeurotic fibrosarcoma oncogene homolog K	protein_coding	NP_001002044.2;XP_005164260.1	ZDB-GENE-040624-9	.	3.42394	607.604	0.255957	6.93731	3.99634e-12	1.62766e-10	9.87755	8.10085	8.56055	8.66287	8.3466	9.2329	9.76953	9.53463	261	281	181	986	1199	985	4.99285	4.76807	3.24419	11.7405	18.4061	14.5661	16.2346	14.8725	10.8712	38.414	58.2467	48.0625
415139	NM_001002049	cryba2a	crystallin, beta A2a	protein_coding	NP_001002049.1	ZDB-GENE-040625-8	.	-11.4656	7113.7	0.268181	-13.1226	2.44364e-39	1.0206e-36	10.1566	13.6757	12.9496	13.4355	12.8097	11.0055	10.941	11.2598	10256	15628	8435	1494	895	1577	431.605	642.771	374.439	37.9632	34.5116	56.986	1403.39	2004.92	1254.73	124.213	109.213	188.032
415149	NM_001002059	lum	lumican	protein_coding	NP_001002059.1	ZDB-GENE-040625-24	.	-3.15621	250.251	0.369849	-4.48343	7.34538e-06	8.42391e-05	6.91455	8.56934	8.06958	8.64487	7.66038	7.0851	7.41834	7.3975	297	528	170	125	139	143	6.52933	11.3478	3.94367	1.65298	2.79804	2.68757	21.2306	35.3958	13.2151	5.40844	8.85451	8.86797
415152	NM_001002062,XM_009297232	gyg1b	glycogenin 1b	protein_coding	NP_001002062.1;XP_009295507.1	ZDB-GENE-040625-30	.	-4.58564	367.052	0.26999	-8.13781	4.02504e-16	2.67998e-14	7.04175	9.23445	8.76849	9.05788	8.55314	7.49166	7.8143	7.51163	523	670	390	160	174	116	16.6078	21.2892	13.6168	3.31106	6.09457	3.49214	54.0015	66.4049	45.6292	10.8336	19.2865	11.5227
415158	NM_001002068	cycsb	cytochrome c, somatic b	protein_coding	NP_001002068.1	ZDB-GENE-040625-38	.	-2.14683	847.93	0.215742	-5.10893	3.23985e-07	5.27072e-06	9.07523	10.1755	10.0526	10.0364	9.74889	9.13271	9.44573	9.35895	1177	1082	792	619	625	593	64.1771	57.6552	45.5505	20.3902	31.248	27.7801	208.677	179.837	152.638	66.7153	98.8856	91.6639
415182	NM_001002092,XM_009297112,XM_017353539	cyp2aa4	cytochrome P450, family 2, subfamily AA, polypeptide 4	protein_coding	NP_001002092.1;XP_009295387.1;XP_017209028.1	ZDB-GENE-040625-72	.	2.60207	154.56	0.31728	4.34839	1.37142e-05	0.000145846	7.8027	6.42359	6.87045	6.56795	6.91899	7.65026	7.61865	7.13502	88	49	90	396	257	148	2.18755	1.13254	2.31119	6.61212	5.69144	3.03809	7.11296	3.5326	7.7447	21.6344	18.0108	10.0245
415200	NM_001002110	zgc:86839	zgc:86839	protein_coding	NP_001002110.1	ZDB-GENE-040625-102	.	-2.46165	44.8833	0.373834	-3.47647	0.00050806	0.00321771	4.70911	5.99118	5.71963	5.60643	5.57249	4.98044	5.13025	5.32661	66	52	50	25	24	39	2.82529	2.17696	2.26428	0.646098	0.915602	1.41563	9.18663	6.79035	7.58751	2.11399	2.89746	4.67103
415228	NM_001002138	crygm2d6	crystallin, gamma M2d6	protein_coding	NP_001002138.1	ZDB-GENE-040625-145	.	-14.3363	3099.79	0.306253	-12.5439	4.29501e-36	1.40944e-33	8.65922	12.5007	11.562	12.3469	11.5005	9.65155	9.60009	9.81975	3844	7877	3428	555	337	519	247.014	494.71	232.341	21.5133	19.8554	28.6468	803.185	1543.09	778.567	70.39	62.8332	94.5236
415232	NM_001002142	crygm2d18	crystallin, gamma M2d18	protein_coding	NP_001002142.1	ZDB-GENE-040625-154	.	-15.5745	7199.06	0.298372	-13.2758	3.19974e-40	1.41348e-37	9.76301	13.7238	12.9109	13.4886	12.7198	10.7205	10.7173	11.0326	10307	17093	8052	1047	695	1250	722.432	1170.95	595.371	44.3311	44.6362	75.2211	2349.04	3652.43	1995.06	145.048	141.253	248.201
415240	NM_001002150	cav2	caveolin 2	protein_coding	NP_001002150.1	ZDB-GENE-040625-164	.	-2.8016	69.3103	0.409513	-3.62932	0.000284174	0.00196323	5.1842	6.67614	6.01922	6.68899	5.96592	5.71038	5.65705	5.54436	64	147	56	62	37	31	1.65036	3.74311	1.51617	0.972599	0.875262	0.681818	5.36625	11.6754	5.08063	3.18228	2.7698	2.24974
431716	NM_001002169	sat1a.2	spermidine/spermine N1-acetyltransferase 1a, duplicate 2	protein_coding	NP_001002169.1	ZDB-GENE-040704-4	.	2.09113	1334.27	0.174926	6.08418	1.17092e-09	3.17184e-08	10.8182	9.75324	10.0493	10.0215	9.89664	10.4758	10.7435	10.5949	848	766	662	2285	2069	1858	26.3078	23.2268	21.6557	42.8417	58.8977	49.5298	85.5417	72.4487	72.5675	140.175	186.384	163.43
431720	NM_001002173,XR_001797330	nr4a1	nuclear receptor subfamily 4, group A, member 1	protein_coding	NP_001002173.1	ZDB-GENE-040704-11	.	-2.75636	1002.62	0.227278	-6.43603	1.22637e-10	3.88563e-09	9.0615	10.5225	10.2205	10.4298	10.029	9.20626	9.54114	9.4115	1315	1546	1008	608	638	571	19.7693	22.5715	15.968	5.4823	8.78741	7.34084	64.2812	70.4048	53.5082	17.9377	27.8081	24.222
431725	NM_001002178,XM_005167363,XM_017357313,XM_017357314	zgc:91909	zgc:91909	protein_coding	NP_001002178.1;XP_005167420.1;XP_017212802.1;XP_017212803.1	ZDB-GENE-040704-16	.	2.59681	315.195	0.227222	6.059	1.36972e-09	3.65432e-08	8.83022	7.45313	7.70386	7.95918	7.71388	8.46126	8.71785	8.44671	139	187	134	605	545	423	4.87644	6.45695	4.99066	12.6555	17.4539	12.7623	15.8561	20.1404	16.7235	41.4081	55.2335	42.1108
431731	NM_001002184,XM_009299704	litaf	lipopolysaccharide-induced TNF factor	protein_coding	NP_001002184.1;XP_009297979.1	ZDB-GENE-040704-23	.	2.40477	120.139	0.27288	4.63904	3.50028e-06	4.36509e-05	7.40847	6.13724	6.56517	6.34469	6.58849	6.92787	7.21652	7.18747	71	45	70	195	190	194	1.63737	0.97263	2.0895	2.92488	4.29482	4.21637	5.32403	3.03382	7.00183	9.57003	13.5911	13.9124
431732	NM_001002185,XM_005162767,XM_009297459	smpx	small muscle protein, X-linked	protein_coding	NP_001002185.1;XP_005162824.1;XP_009295734.1	ZDB-GENE-040704-24	.	-4.26354	102.236	0.343578	-6.08903	1.136e-09	3.08088e-08	5.29178	7.36894	6.71912	7.18587	6.74424	5.74766	6.11101	5.95289	119	197	117	38	52	41	2.21779	3.59193	2.33659	0.445635	0.876569	0.617351	7.2113	11.2039	7.8298	1.45809	2.77393	2.03702
431744	NM_001002197	sh3bgrl2	SH3 domain binding glutamate-rich protein like 2	protein_coding	NP_001002197.1	ZDB-GENE-040704-38	.	-2.31178	276.987	0.309785	-3.90273	9.51128e-05	0.000776417	7.38882	8.59388	8.62424	7.9065	8.32449	7.46615	7.80712	7.70396	495	197	335	184	200	184	10.4224	4.04022	7.44257	2.33313	3.86065	3.31499	33.8893	12.6022	24.9397	7.63386	12.2172	10.9382
431764	NM_001002217	cpa4	carboxypeptidase A4	protein_coding	NP_001002217.1	ZDB-GENE-040704-61	.	-4.55357	30.6791	0.627619	-3.4846	0.00049288	0.00313541	3.50034	5.64506	5.061	4.90368	5.18245	4.11713	4.67536	4.31294	46	33	53	3	24	8	1.42576	0.993428	1.75982	0.054277	0.673259	0.203695	4.63597	3.09869	5.89708	0.177591	2.13055	0.672115
431766	NM_001002219	htra1a	HtrA serine peptidase 1a	protein_coding	NP_001002219.1	ZDB-GENE-040704-64	.	-2.38317	99.3216	0.331725	-3.77687	0.00015881	0.00119647	5.86986	7.13097	6.76463	7.09934	6.50769	6.36246	6.15971	6.14781	119	170	79	108	51	53	2.59897	3.64189	1.82585	1.42883	1.01095	0.99417	8.45075	11.3597	6.11835	4.67505	3.1992	3.28038
432386	NM_001002309,XM_009298773	pih1d3	PIH1 domain containing 3	protein_coding	NP_001002309.1;XP_009297048.1	ZDB-GENE-040722-2	.	5.79402	16.851	0.625403	4.05269	5.06328e-05	0.000448495	4.84628	2.30344	3.69859	3.74276	3.61167	4.03243	4.22099	4.31643	5	6	2	29	30	38	0.219696	0.258534	0.076319	0.785288	1.21992	1.43535	0.714356	0.806414	0.255741	2.56941	3.86049	4.73611
432388	NM_001002311,XM_005171374	lrrc6	leucine rich repeat containing 6	protein_coding	NP_001002311.1;XP_005171431.1	ZDB-GENE-040827-2	.	2.27031	111.449	0.295522	4.00272	6.2618e-05	0.000542792	7.27235	6.09389	6.31775	6.64827	6.29106	7.12395	6.99529	6.85153	51	82	46	267	153	134	1.07447	1.7131	1.02776	3.67839	3.17906	2.54065	3.4937	5.34347	3.44398	12.0354	10.0603	8.38318
436588	NM_001002317	polr2d	polymerase (RNA) II (DNA directed) polypeptide D	protein_coding	NP_001002317.2	ZDB-GENE-040714-2	.	2.0259	81.683	0.303037	3.36118	0.000776108	0.00457652	6.77383	5.75325	6.22673	5.96118	5.97883	6.51543	6.36483	6.6571	65	38	40	160	87	138	4.46169	2.52051	2.86367	6.71182	5.52662	8.21542	14.5075	7.86193	9.59602	21.9607	17.4892	27.1077
436603	NM_001002331	agxta	alanine-glyoxylate aminotransferase a	protein_coding	NP_001002331.1	ZDB-GENE-040718-16	.	-5.32708	41.8291	0.457546	-5.27454	1.33087e-07	2.3337e-06	3.72902	6.13746	5.65531	5.50523	5.49512	4.66196	4.54396	4.95079	74	56	56	16	5	25	2.34003	1.72559	1.88498	0.303522	0.129167	0.666549	7.60876	5.38244	6.3165	0.993103	0.408755	2.19936
436615	NM_001002343,XM_005171375,XM_021479745	gbp1	guanylate binding protein 1	protein_coding	NP_001002343.1;XP_005171432.1;XP_021335420.1	ZDB-GENE-040718-32	.	2.41642	36.7027	0.443409	2.87065	0.00409633	0.0182146	5.69525	4.43243	4.92497	4.82896	4.94643	5.5765	5.01189	5.3401	21	15	21	110	28	55	0.363489	0.227111	0.379258	1.15233	0.433128	0.824682	1.18191	0.708402	1.27088	3.77035	1.37065	2.72114
436622	NM_001002350	zgc:92162	zgc:92162	protein_coding	NP_001002350.1	ZDB-GENE-040718-41	.	-3.036	7.23383	0.78012	-2.05375	0.04	NA	1.81964	3.45124	2.96734	2.82637	2.87923	2.73071	2.65581	2.70762	13	7	9	7	2	4	0.414284	0.221545	0.319433	0.137745	0.062398	0.116609	1.34708	0.691042	1.07041	0.450693	0.197462	0.384766
436636	NM_001002363	cd36	CD36 molecule (thrombospondin receptor)	protein_coding	NP_001002363.1	ZDB-GENE-040718-55	.	-2.25089	136.6	0.257238	-4.55024	5.35838e-06	6.39083e-05	6.38963	7.56496	7.34059	7.06557	7.44134	6.79838	6.66706	6.66179	183	120	197	142	77	81	4.73714	3.01568	5.37065	2.21557	1.82087	1.80177	15.4031	9.40646	17.9968	7.2492	5.76221	5.94516
436644	NM_001002371	eef1a2	eukaryotic translation elongation factor 1 alpha 2	protein_coding	NP_001002371.1	ZDB-GENE-040718-64	.	-2.9576	32.0482	0.466996	-3.34998	0.000808167	0.00473461	4.00755	5.58534	5.00926	5.17611	5.20727	4.67054	4.40622	4.78252	35	44	47	27	6	25	0.737279	0.928956	1.06951	0.342007	0.104557	0.455947	2.39732	2.89759	3.58388	1.11903	0.330875	1.50445
436646	NM_001002373,XM_021480558	galm	galactose mutarotase	protein_coding	NP_001002373.1;XP_021336233.1	ZDB-GENE-040718-66	.	2.23944	46.129	0.325537	3.57297	0.00035295	0.00236857	5.99611	4.82936	5.27061	5.19514	5.29437	5.6489	5.73509	5.67958	27	21	27	88	68	66	0.832857	0.754569	0.904715	1.98996	1.97535	1.79034	2.70809	2.35364	3.03166	6.51103	6.25108	5.90745
436651	NM_001002378	zgc:92066	zgc:92066	protein_coding	NP_001002378.1	ZDB-GENE-040718-72	.	3.0064	3268.62	0.177189	8.96239	3.17717e-19	2.93103e-17	12.2602	10.6721	11.0057	11.1503	10.938	11.9105	12.1067	11.8659	1432	1617	1243	6806	5640	4604	71.1305	78.5131	65.1079	204.254	256.985	196.499	231.286	244.897	218.174	668.307	813.24	648.371
436652	NM_001002379	entpd8	ectonucleoside triphosphate diphosphohydrolase 8	protein_coding	NP_001002379.2	ZDB-GENE-040724-142	.	-2.59512	30.3286	0.471255	-2.91944	0.00350663	0.0160524	4.09727	5.44431	5.13385	5.08993	4.85887	4.40767	4.78136	4.59309	47	41	27	13	26	17	0.985641	0.828937	0.586379	0.159454	0.499268	0.294957	3.20488	2.58561	1.96493	0.521725	1.57995	0.973244
436668	NM_001002395,XM_005168710	faimb	Fas apoptotic inhibitory molecule b	protein_coding	NP_001002395.1;XP_005168767.1	ZDB-GENE-040718-91	.	-2.30071	213.541	0.271191	-4.43258	9.31141e-06	0.00010363	7.01655	8.21725	8.09606	7.5781	8.09802	7.27727	7.28519	7.38203	322	159	307	181	122	149	16.8239	8.10922	16.9301	5.70266	5.82722	6.65526	54.7042	25.2942	56.7321	18.6587	18.4405	21.9598
436672	NM_001002399,XM_005162686	pdha1b	pyruvate dehydrogenase (lipoamide) alpha 1b	protein_coding	NP_001002399.1;XP_005162743.1	ZDB-GENE-040718-96	.	-2.06997	84.9347	0.328937	-3.19092	0.00141822	0.00759567	5.78938	6.83999	6.76754	6.20357	6.64881	6.13087	6.09443	6.04029	136	57	111	88	55	53	3.45466	1.39969	2.99017	1.35898	1.29507	1.15802	11.2331	4.36589	10.0199	4.44651	4.09828	3.82103
436676	NM_001002403	dnase1l1l	deoxyribonuclease I-like 1-like	protein_coding	NP_001002403.1	ZDB-GENE-040718-100	.	-7.21103	250.946	0.369405	-7.71566	1.20358e-14	6.75979e-13	5.93587	8.78357	8.09184	8.61055	7.88727	6.63533	6.53586	7.04231	341	557	257	72	37	102	13.692	21.8577	10.8868	1.72492	1.35832	3.49137	44.5204	68.1781	36.4813	5.64382	4.29845	11.5202
436678	NM_001002405	arr3a	arrestin 3a, retinal (X-arrestin)	protein_coding	NP_001002405.1	ZDB-GENE-040718-102	.	-3.16213	1979.9	0.268483	-6.18623	6.16189e-10	1.74747e-08	9.8946	11.5546	11.4041	10.849	11.3702	10.013	10.3877	10.3541	3285	1667	3013	990	1103	1119	83.9604	41.6446	81.2367	15.2827	25.8465	24.5609	273.003	129.897	272.221	50.0042	81.7922	81.0416
436680	NM_001002407,XM_021468047	lim2.4	lens intrinsic membrane protein 2.4	protein_coding	NP_001002407.1;XP_021323722.1	ZDB-GENE-040718-104	.	-8.52459	676.389	0.326527	-9.46822	2.84644e-21	3.14354e-19	7.15177	10.2415	9.58683	10.0491	9.33035	7.83112	7.80057	8.24706	984	1482	710	163	101	224	46.6962	69.2149	35.9449	4.59814	4.33934	9.16039	151.836	215.894	120.45	15.0448	13.732	30.2258
436681	NM_001002408	crygm2d13	crystallin, gamma M2d13	protein_coding	NP_001002408.1	ZDB-GENE-040718-105	.	-21.0855	7425.75	0.265469	-16.5676	1.19478e-61	2.11117e-58	9.39369	13.7915	12.9714	13.4868	12.7521	10.571	10.5926	10.7603	11224	17417	8542	864	601	863	809.942	1228.35	650.233	37.6312	39.7679	53.4805	2633.58	3831.47	2178.9	123.127	125.847	176.465
436686	NM_001103137,XM_009299530	syt5a	synaptotagmin Va	protein_coding	NP_001096607.1;XP_009297805.1	ZDB-GENE-040718-110	.	-3.27299	301.523	0.271223	-6.30703	2.84446e-10	8.47471e-09	7.14033	8.85165	8.57849	8.1457	8.70635	7.62564	7.66604	7.41567	459	259	503	225	159	115	11.7512	6.36253	13.5383	3.42715	3.76098	2.47546	38.21	19.8459	45.3662	11.2134	11.9018	8.16808
436699	NM_001002426	zgc:92658	zgc:92658	protein_coding	NP_001002426.1	ZDB-GENE-040718-123	.	-2.27098	54.5719	0.38992	-3.03476	0.00240725	0.0117942	5.05941	6.2441	6.06428	5.52936	6.05627	5.44975	5.33291	5.51804	86	34	81	51	26	41	3.22991	1.23645	3.19807	1.14126	0.89536	1.29177	10.5023	3.85671	10.7166	3.73414	2.8334	4.26237
436704	NM_001002431,XM_005163426,XM_005163427,XM_005163428,XM_009298568	rgs20	regulator of G protein signaling 20	protein_coding	NP_001002431.1;XP_005163483.1;XP_005163484.1;XP_005163485.1;XP_009296843.1	ZDB-GENE-040718-128	.	-2.16127	407.332	0.271486	-4.09553	4.21195e-05	0.000385931	8.01077	9.12088	9.11091	8.46777	8.96724	8.15517	8.28875	8.33366	657	288	532	329	264	297	13.0182	5.4539	11.1775	4.22653	4.7912	5.17702	42.3295	17.0117	37.4554	13.8289	15.1619	17.0822
436716	NM_001002443	opn1lw2	opsin 1 (cone pigments), long-wave-sensitive, 2	protein_coding	NP_001002443.1	ZDB-GENE-040718-141	.	-7.66107	8368.39	0.254675	-11.5345	8.84102e-31	2.05138e-28	10.9166	13.8537	13.6065	12.9706	13.3891	11.4786	11.7821	11.6566	17477	8454	13330	2198	2322	2052	489.395	231.373	393.761	37.1665	59.6205	49.3596	1591.3	721.695	1319.48	121.607	188.671	162.868
436720	NM_001002447,XM_005156283,XM_005156285,XM_017358446	myoz1b	myozenin 1b	protein_coding	NP_001002447.1;XP_005156340.1;XP_005156342.1;XP_017213935.1	ZDB-GENE-040718-146	.	-2.1924	335.089	0.273969	-4.13372	3.56936e-05	0.000335345	7.71511	8.84565	8.49989	8.91102	8.29399	7.84192	8.05229	8.02212	373	558	276	257	230	234	12.8228	18.6326	9.92271	5.31363	7.30863	6.83736	41.6942	58.1186	33.2506	17.3859	23.1284	22.5607
436732	NM_001002459,XM_021471102	cplx2l	complexin 2, like	protein_coding	NP_001002459.1;XP_021326777.1	ZDB-GENE-040718-160	.	-3.63428	1360.98	0.172006	-10.8233	2.67126e-27	4.72012e-25	9.19959	11.0593	10.7785	10.7538	10.6152	9.51379	9.69202	9.71431	2078	1894	1655	723	620	677	51.3787	45.1181	42.4192	10.8086	13.7829	14.1136	167.062	140.732	142.145	35.3652	43.6165	46.5694
436734	NM_001002461	txn	thioredoxin	protein_coding	NP_001002461.1	ZDB-GENE-040718-162	.	6.36417	126.091	0.322877	8.26932	1.3473e-16	9.43563e-15	7.76792	5.09685	5.99015	6.09535	5.93875	7.13857	7.53272	6.97711	30	35	25	283	300	166	2.0442	2.31472	1.81058	11.7959	19.0049	9.85774	6.64687	7.22004	6.06718	38.5956	60.1419	32.5268
436735	NM_001002462	dusp23b	dual specificity phosphatase 23b	protein_coding	NP_001002462.1	ZDB-GENE-040718-163	.	-2.01928	58.6926	0.337142	-3.00717	0.00263695	0.0126775	5.27444	6.29794	5.83522	6.23859	5.93206	5.67971	5.54103	5.56562	54	92	60	67	34	38	2.97729	5.00054	3.4873	2.23561	1.72402	1.7791	9.68087	15.5976	11.6858	7.31478	5.45571	5.87036
436774	NM_001030242	sypb	synaptophysin b	protein_coding	NP_001025413.2	ZDB-GENE-040718-205	.	-2.62322	2345.53	0.236322	-5.88746	3.92171e-09	9.54296e-08	10.339	11.7295	11.6135	11.173	11.5458	10.4292	10.7793	10.6947	3655	2100	3231	1431	1518	1445	75.3543	42.3179	70.2687	17.8185	28.696	25.5881	245.02	131.998	235.468	58.3009	90.8095	84.4309
436778	NM_001002505	sub1b	SUB1 homolog, transcriptional regulator b	protein_coding	NP_001002505.1	ZDB-GENE-040718-209	.	-2.57738	111.194	0.27949	-4.88714	1.02312e-06	1.46339e-05	5.96646	7.32066	7.15055	6.83255	7.00572	6.18973	6.47697	6.38127	175	109	139	69	75	68	11.1864	6.82364	9.37732	2.67005	4.41237	3.72458	36.3733	21.2842	31.423	8.73623	13.9631	12.2897
436804	NM_001002531	rgs8	regulator of G protein signaling 8	protein_coding	NP_001002531.1	ZDB-GENE-040718-264	.	-2.32674	213.486	0.307235	-3.9654	7.32728e-05	0.000620401	7.00474	8.22184	8.1538	7.47525	8.0849	7.29005	7.39947	7.20348	347	140	305	187	146	116	11.0175	4.33908	10.221	3.59005	4.24901	3.1465	35.8241	13.5344	34.2501	11.7464	13.4462	10.3823
436805	NM_001002532	zgc:92912	zgc:92912	protein_coding	NP_001002532.1	ZDB-GENE-040718-265	.	-3.23859	319.642	0.203703	-8.32275	8.59476e-17	6.13137e-15	7.23192	8.93358	8.7002	8.56986	8.51202	7.79975	7.58213	7.62389	501	405	385	267	129	146	21.3528	16.8635	17.2811	6.86115	5.00812	5.34061	69.4302	52.6004	57.9083	22.4492	15.8484	17.622
436833	NM_001002560,XM_005158344,XM_005158346	gstk1	glutathione S-transferase kappa 1	protein_coding	NP_001002560.1;XP_005158401.1;XP_005158403.1	ZDB-GENE-040718-298	.	-2.10763	83.6011	0.290478	-3.70293	0.00021312	0.00152653	5.75118	6.82453	6.32174	6.60668	6.67894	6.02054	6.06581	6.13876	74	105	118	72	52	63	2.85063	3.94591	5.09259	2.05492	1.77673	2.17062	9.26904	12.308	17.0651	6.72358	5.62254	7.16221
436836	NM_001002563,XM_005158637	stmn4l	stathmin-like 4, like	protein_coding	NP_001002563.1;XP_005158694.1	ZDB-GENE-040718-301	.	3.61416	2211.45	0.149011	12.4397	1.59039e-35	5.0045e-33	11.7584	9.90473	10.3537	10.2722	10.4031	11.4697	11.4571	11.3358	886	741	900	5372	3555	3303	32.5425	26.5348	34.8128	119.258	119.624	104.247	105.814	82.7671	116.656	390.205	378.554	343.977
436841	NM_001002568	gc	group-specific component (vitamin D binding protein)	protein_coding	NP_001002568.2	ZDB-GENE-040718-307	.	-2.6261	20.1818	0.534957	-2.6038	0.00921954	0.034844	3.46934	4.87223	4.63104	4.15823	4.409	4.11423	4.04045	4.0247	40	13	25	20	10	10	1.08011	0.329802	0.71055	0.31287	0.236889	0.22006	3.51205	1.02871	2.38102	1.02369	0.749646	0.726113
436842	NM_001002569	tpmt.1	thiopurine S-methyltransferase, tandem duplicate 1	protein_coding	NP_001002569.2	ZDB-GENE-050522-141	.	2.62354	90.3903	0.297821	4.67232	2.9782e-06	3.78596e-05	7.031	5.64386	5.95589	6.25329	5.99577	6.79402	6.7549	6.55631	36	58	37	215	138	112	1.65065	2.60215	1.77208	5.99183	5.83612	4.44817	5.36722	8.11658	5.93818	19.6049	18.4686	14.6773
436854	NM_001002581	crygm2d8	crystallin, gamma M2d8	protein_coding	NP_001002581.2	ZDB-GENE-040718-321	.	-18.2065	7199.81	0.305904	-13.6853	1.2434e-42	6.64233e-40	9.55036	13.7366	12.7922	13.5283	12.7106	10.6419	10.5796	10.8651	9370	18140	8193	991	588	1029	657.788	1244.67	606.736	41.9929	37.8322	62.0062	2138.85	3882.36	2033.15	137.398	119.722	204.597
436855	NM_001002582	crygm2d15	crystallin, gamma M2d15	protein_coding	NP_001002582.1	ZDB-GENE-040718-322	.	-18.6938	4549.66	0.287959	-14.6705	9.96564e-49	8.80464e-46	8.85231	13.0763	12.2082	12.8293	12.039	9.95937	9.95356	10.1764	6415	11078	5129	594	391	616	453.258	765.02	382.289	25.3279	25.3344	37.3754	1473.8	2386.24	1281.03	82.8714	80.1717	123.325
436857	NM_001002584,XM_005167477	cryba2b	crystallin, beta A2b	protein_coding	NP_001002584.1;XP_005167534.1	ZDB-GENE-040718-324	.	-16.4417	4893.56	0.26379	-15.3125	6.31049e-53	8.52696e-50	9.13236	13.1715	12.3271	12.9051	12.2435	10.2061	10.1558	10.3734	6840	11362	5969	768	467	723	414.791	677.165	382.617	28.0326	25.8444	37.7139	1348.72	2112.2	1282.13	91.7208	81.7855	124.442
436859	NM_001002586	cryba1b	crystallin, beta A1b	protein_coding	NP_001002586.1	ZDB-GENE-040718-326	.	-12.9528	11379.6	0.284026	-13.01	1.07299e-38	4.10796e-36	10.6717	14.3669	13.5281	14.1609	13.4684	11.5918	11.5033	11.8163	15133	26658	13526	2198	1262	2227	647.355	1114.58	610.394	56.7796	49.5001	81.8238	2104.92	3476.57	2045.41	185.779	156.645	269.987
436860	NM_001002587	lim2.3	lens intrinsic membrane protein 2.3	protein_coding	NP_001002587.1	ZDB-GENE-040718-327	.	-7.59075	149.869	0.354133	-8.25747	1.48795e-16	1.03575e-14	5.11052	8.05089	7.40071	7.80858	7.1156	6.20862	5.89258	6.10209	221	325	150	68	21	38	12.8063	18.4412	9.15013	2.38102	1.09039	1.87211	41.6407	57.5215	30.6617	7.79053	3.45057	6.17727
436863	NM_001002590	hrasls	HRAS-like suppressor	protein_coding	NP_001002590.2	ZDB-GENE-040718-330	.	-4.1333	65.9965	0.48087	-4.25748	2.06742e-05	0.000207927	4.69404	6.72939	6.05024	6.45933	6.12203	5.11778	5.17658	5.72791	76	122	80	19	14	53	4.07943	6.39067	4.5261	0.616029	0.641015	2.40993	13.2646	19.9337	15.1668	2.01561	2.02852	7.95186
436872	NM_001002599	sult1st6	sulfotransferase family 1, cytosolic sulfotransferase 6	protein_coding	NP_001002599.1	ZDB-GENE-040718-343	.	-9.34442	43.1628	0.412143	-7.82279	5.16659e-15	3.05095e-13	3.02022	6.28933	5.58133	5.54995	5.6773	4.63435	4.54919	4.50684	69	62	75	17	7	6	1.92328	1.66607	2.19698	0.272297	0.167796	0.126786	6.25369	5.1968	7.36198	0.89094	0.530997	0.418347
436923	NM_001002650,XM_009298725,XM_017358225	crlf1a	cytokine receptor-like factor 1a	protein_coding	NP_001002650.1;XP_009297000.1;XP_017213714.1	ZDB-GENE-040718-397	.	2.05385	300.946	0.210888	4.92363	8.49536e-07	1.2406e-05	8.66099	7.62288	7.90144	8.01912	7.68423	8.44593	8.41671	8.46706	186	204	129	598	388	436	2.93293	3.43739	2.11293	6.32734	6.01938	6.05747	9.53664	10.7218	7.08033	20.7027	19.0486	19.9873
436941	NM_001002668,XM_005159611,XM_009294314,XM_017352222	zgc:91944	zgc:91944	protein_coding	NP_001002668.1;XP_005159668.1;XP_009292589.1;XP_017207711.1	ZDB-GENE-040718-417	.	-2.255	419.104	0.194793	-6.02243	1.71817e-09	4.47993e-08	8.00952	9.18119	8.81201	9.10449	8.88803	8.21553	8.29925	8.34793	455	596	473	344	258	292	5.78069	7.51087	6.34945	2.52366	2.98624	3.2158	18.7963	23.4278	21.2768	8.25725	9.45007	10.6109
436958	NM_001002685,XM_021468810	gpat3	glycerol-3-phosphate acyltransferase 3	protein_coding	NP_001002685.1;XP_021324485.1	ZDB-GENE-040718-436	.	-2.45582	441.832	0.304615	-4.25522	2.0884e-05	0.000209579	7.99804	9.29465	8.74467	9.41728	8.73729	8.32008	8.39966	8.12703	417	832	393	394	293	213	9.79408	18.9117	9.87021	5.86401	6.54148	4.3538	31.8462	58.989	33.0747	19.1867	20.7008	14.3659
436974	NM_001002701	tmem136b	transmembrane protein 136b	protein_coding	NP_001002701.1	ZDB-GENE-040718-455	.	-2.72949	94.5159	0.308562	-4.69477	2.66906e-06	3.43479e-05	5.66604	7.11121	6.90136	6.48133	6.86267	6.08027	6.22326	5.97922	150	80	136	73	62	42	6.19329	3.21766	5.94083	1.82463	2.32493	1.4917	20.1379	10.0365	19.9075	5.97007	7.35732	4.92204
436981	NM_001002708	pde6d	phosphodiesterase 6D, cGMP-specific, rod, delta	protein_coding	NP_001002708.1	ZDB-GENE-040718-463	.	-2.00651	197.226	0.281579	-3.56806	0.00035963	0.00240426	7.03942	8.03841	7.95195	7.49219	7.91987	7.08307	7.39429	7.34341	285	150	261	144	152	150	11.5701	5.94667	11.2058	3.5386	5.65562	5.22841	37.6211	18.5488	37.5502	11.5781	17.8974	17.2518
437008	NM_001002735,XM_021477464,XM_021477465,XM_021477466,XM_021477467	lctla	lactase-like a	protein_coding	NP_001002735.1;XP_021333139.1;XP_021333140.1;XP_021333141.1;XP_021333142.1	ZDB-GENE-040718-233	.	-2.81781	675.34	0.318961	-4.68575	2.78938e-06	3.56517e-05	8.46554	9.96172	9.39559	10.0194	9.42373	8.93808	8.45502	8.9285	679	1263	667	628	212	440	11.363	20.6724	11.7866	6.30616	3.25292	6.28959	36.9477	64.4811	39.4964	20.6334	10.294	20.7533
437013	NM_001002740,XM_005156067,XM_005156068,XM_005156069,XM_005156070,XR_002459724	eef2k	eukaryotic elongation factor 2 kinase	protein_coding	NP_001002740.1;XP_005156124.1;XP_005156125.1;XP_005156126.1;XP_005156127.1	ZDB-GENE-020916-2	.	2.1512	3553.68	0.151553	7.29211	3.05141e-13	1.45725e-11	12.2443	11.1393	11.3169	11.4991	11.3235	12.0539	12.047	11.9999	1891	2225	1813	7314	4867	4893	25.9326	32.8164	26.1243	62.9776	65.3413	61.9959	84.3217	102.36	87.5413	206.059	206.775	204.563
437021	NM_001002748	tspan36	tetraspanin 36	protein_coding	NP_001002748.1	ZDB-GENE-040718-248	.	3.2363	619.791	0.283594	5.97455	2.30726e-09	5.88237e-08	9.88739	8.19216	8.56815	8.76352	8.41536	9.17462	9.84941	9.52927	258	315	196	907	1289	966	7.58123	9.06069	6.09176	16.1516	34.8423	24.4596	24.6509	28.262	20.4132	52.8469	110.26	80.7074
437026	NM_001002753,NR_131952	ccdc103	coiled-coil domain containing 103	protein_coding	NP_001002753.1	ZDB-GENE-040718-253	.	2.10844	38.3712	0.451733	2.38232	0.0172039	0.0568129	5.69794	4.63416	4.91742	5.21257	4.85259	5.62841	5.2103	5.25848	18	33	14	111	38	44	0.328504	0.608346	0.268174	1.28676	0.655282	0.718984	1.06815	1.89754	0.898639	4.21019	2.07367	2.37237
445029	NM_001003423	tnni2b.2	troponin I type 2b (skeletal, fast), tandem duplicate 2	protein_coding	NP_001003423.1	ZDB-GENE-040801-9	.	-2.18488	178.444	0.256762	-4.39143	1.12605e-05	0.000122765	6.81248	7.93362	7.65863	7.85426	7.49977	6.91592	7.17674	7.18493	217	257	169	125	124	133	12.4681	14.4183	10.211	4.33866	6.52703	6.53774	40.541	44.9733	34.2166	14.1958	20.655	21.572
445034	NM_001003428	crygn2	crystallin, gamma N2	protein_coding	NP_001003428.1	ZDB-GENE-040801-16	.	-11.1954	6964	0.278284	-12.5226	5.61767e-36	1.81751e-33	10.1574	13.6423	12.8648	13.4646	12.7219	11.0334	10.9372	11.1984	9494	16221	7776	1609	917	1474	429.479	717.223	371.121	43.9654	38.0388	57.2709	1396.48	2237.15	1243.61	143.852	120.375	188.972
445036	NM_001003430	grifin	galectin-related inter-fiber protein	protein_coding	NP_001003430.1	ZDB-GENE-040801-163	.	-3.39746	24.6765	0.530668	-3.32497	0.000884269	0.00509853	3.47229	5.25756	5.00168	4.44529	4.65404	4.32725	4.18459	4.16887	55	18	29	23	9	9	3.57783	1.11009	2.02305	0.899514	0.503107	0.471266	11.6336	3.46258	6.77916	2.94315	1.5921	1.555
445044	NM_001003438	rs1a	retinoschisin 1a	protein_coding	NP_001003438.1	ZDB-GENE-040801-171	.	-2.39038	788.974	0.295885	-4.24907	2.14658e-05	0.00021448	8.86383	10.119	10.1016	9.49525	9.89265	8.81027	9.32139	9.20532	1324	624	1002	438	584	534	45.5401	20.9566	36.3582	9.09033	18.4081	15.7867	148.077	65.3675	121.835	29.743	58.2531	52.0899
445054	NM_001003448	zgc:92113	zgc:92113	protein_coding	NP_001003448.1	ZDB-GENE-040801-184	.	-2.69581	114.111	0.306105	-4.67394	2.9547e-06	3.75941e-05	5.94674	7.37973	7.0496	7.28482	6.7216	6.37125	6.25948	6.43052	153	191	94	94	51	73	4.03951	4.92323	2.60581	1.4953	1.21356	1.64355	13.1347	15.3565	8.73197	4.89254	3.84035	5.42309
445057	NM_001003451	dusp2	dual specificity phosphatase 2	protein_coding	NP_001003451.1	ZDB-GENE-040801-188	.	-2.55425	323.098	0.291633	-4.63905	3.50011e-06	4.36509e-05	7.50891	8.85815	8.76116	8.16084	8.69024	7.65309	8.00226	7.80132	526	242	462	208	228	183	10.7292	4.82618	9.93399	2.56041	4.2664	3.19284	34.8869	15.0537	33.2884	8.37749	13.5012	10.5352
445058	NM_001003452,XM_005168874	tipin	timeless interacting protein	protein_coding	NP_001003452.2;XP_005168931.1	ZDB-GENE-040801-189	.	-2.11545	48.3758	0.384231	-2.81331	0.00490336	0.021157	4.95608	6.03806	5.51461	5.87425	5.76037	5.32957	5.45771	5.11515	42	70	60	48	41	20	1.21469	2.0245	1.86959	0.846315	1.09391	0.494989	3.94964	6.31479	6.26492	2.76909	3.46171	1.63328
445083	NM_001003477	dhrs3a	dehydrogenase/reductase (SDR family) member 3a	protein_coding	NP_001003477.1	ZDB-GENE-040801-217	.	-2.39857	119.199	0.299816	-4.20983	2.55558e-05	0.000250659	6.13711	7.39246	6.98504	7.28666	6.9819	6.3626	6.70031	6.34838	133	182	126	85	97	58	3.62191	4.84927	3.61381	1.39513	2.42287	1.36065	11.7769	15.1258	12.1097	4.56479	7.66727	4.48963
445085	NM_001003479	rasgef1bb	RasGEF domain family, member 1Bb	protein_coding	NP_001003479.1	ZDB-GENE-040801-220	.	2.06122	815.838	0.159735	6.53266	6.46114e-11	2.13552e-09	10.1019	9.0573	9.30735	9.27303	9.30962	9.77768	9.98696	9.91401	493	441	470	1414	1203	1174	10.4699	9.15636	10.5234	18.1568	23.461	21.4435	34.0435	28.5604	35.2635	59.4079	74.2431	70.7553
445091	NM_001003485	zgc:92480	zgc:92480	protein_coding	NP_001003485.1	ZDB-GENE-040801-227	.	3.04437	286.063	0.350492	4.58255	4.59341e-06	5.55052e-05	8.75022	7.14489	7.35176	7.21087	7.91631	8.55215	8.47447	8.16866	96	70	206	743	458	340	1.61989	1.14486	3.66987	7.6024	7.11042	4.94802	5.26719	3.57104	12.2976	24.8746	22.5012	16.3266
445114	NM_001003508	cdk5r2b	cyclin-dependent kinase 5, regulatory subunit 2b (p39)	protein_coding	NP_001003508.1	ZDB-GENE-040801-251	.	-5.3608	798.872	0.287278	-8.43243	3.38571e-17	2.5735e-15	7.97511	10.3946	10.1421	9.49245	10.0994	8.36469	8.71333	8.62263	1504	695	1368	267	302	281	25.4688	11.4993	24.4376	2.72494	4.68833	4.08695	82.8137	35.8685	81.8893	8.91583	14.8364	13.4854
445130	NM_001003524,XM_005169682,XM_005169685,XM_005169686,XM_005169687,XM_005169688,XM_005169689,XM_005169690,XM_009291451,XM_009291452,XM_009291453,XM_009291457,XM_021481381,XM_021481382,XM_021481383,XM_021481384,XM_021481385	sh3bgr	SH3 domain binding glutamate-rich protein	protein_coding	NP_001003524.1;XP_005169739.1;XP_005169742.1;XP_005169743.1;XP_005169744.1;XP_005169745.1;XP_005169746.1;XP_005169747.1;XP_009289726.1;XP_009289727.1;XP_009289728.1;XP_009289732.1;XP_021337056.1;XP_021337057.1;XP_021337058.1;XP_021337059.1;XP_021337060.1	ZDB-GENE-040801-27	.	-2.1048	471.921	0.313852	-3.421	0.000623925	0.00381784	8.24829	9.3214	8.99922	9.4737	8.5904	8.3843	8.4998	8.53722	530	842	306	397	310	345	12.2894	18.5513	7.41131	7.51	7.4141	7.49804	39.9599	57.8651	24.835	24.5722	23.4622	24.7407
445140	NM_001003534	mipa	major intrinsic protein of lens fiber a	protein_coding	NP_001003534.1	ZDB-GENE-040801-41	.	-10.3403	1279.93	0.247261	-13.6302	2.65001e-42	1.29518e-39	7.81899	11.1886	10.688	10.8066	10.3359	8.67635	8.59306	8.90951	2265	2391	1493	303	173	311	35.0438	36.1683	24.3744	2.82598	2.45047	4.13116	113.947	112.816	81.6776	9.24642	7.75459	13.6312
445158	NM_001003552	slc16a9b	solute carrier family 16, member 9b	protein_coding	NP_001003552.1	ZDB-GENE-040801-69	.	3.96366	1206.1	0.1848	10.7513	5.84628e-27	9.94777e-25	10.9117	8.92412	9.52989	9.25267	9.42264	10.5009	10.6331	10.5114	524	331	430	2692	2082	1935	9.01912	5.5725	7.81435	28.0271	32.9103	28.6431	29.3263	17.3817	26.1856	91.7028	104.146	94.5112
445167	NM_001003561,XM_005161168	stx2a	syntaxin 2a	protein_coding	NP_001003561.1;XP_005161225.1	ZDB-GENE-040801-80	.	2.29515	108.674	0.257789	4.6495	3.32744e-06	4.16974e-05	7.24369	6.0399	6.51452	6.37385	6.28776	6.8527	7.04091	6.99626	73	54	47	192	165	165	1.04836	0.760792	0.772689	1.68433	2.21009	2.05804	3.40883	2.37305	2.58925	5.51101	6.99392	6.79074
445198	NM_001003592,XM_005167028	suv39h1a	suppressor of variegation 3-9 homolog 1a	protein_coding	NP_001003592.1;XP_005167085.1	ZDB-GENE-040801-111	.	-2.24235	24.6705	0.499849	-2.33072	0.0197681	0.063297	3.90614	5.10219	4.86726	4.67928	4.59793	4.56365	4.24972	4.30257	41	27	23	36	9	12	1.3946	0.820304	0.734936	0.826397	0.235514	0.399892	4.53464	2.55868	2.46274	2.70392	0.745293	1.31949
445208	NM_001003602,NM_001114708,XM_005166561,XM_009303481,XM_009303482,XM_009303484,XM_009303485,XM_021477468	camk2d1	calcium/calmodulin-dependent protein kinase (CaM kinase) II delta 1	protein_coding	NP_001003602.1;NP_001108180.1;XP_005166618.1;XP_009301756.1;XP_009301757.1;XP_009301759.1;XP_009301760.1;XP_021333143.1	ZDB-GENE-040801-121	.	-2.30545	600.724	0.28167	-4.27823	1.88387e-05	0.00019148	8.50548	9.71086	9.46983	8.99535	9.7691	8.81801	8.76848	8.72315	775	414	1024	571	358	357	11.0733	6.35883	15.1364	5.89781	4.80486	4.9088	36.0058	19.8344	50.7216	19.2973	15.2052	16.1972
445211	NM_001003605,XM_009294580,XM_009294581,XM_021468400	zgc:100997	zgc:100997	protein_coding	NP_001003605.1;XP_009292855.1;XP_009292856.1;XP_021324075.1	ZDB-GENE-040801-124	.	2.74981	127.375	0.268196	5.44128	5.28977e-08	1.01683e-06	7.54563	6.08562	6.65509	6.30506	6.55505	7.30966	7.17946	7.17842	78	39	63	305	175	185	1.80981	0.764012	1.23179	3.2142	3.05129	2.90362	5.88473	2.38309	4.12769	10.5167	9.65591	9.58084
445217	NM_001003611	mettl16	methyltransferase like 16	protein_coding	NP_001003611.1	ZDB-GENE-040801-130	.	3.09807	290.038	0.223858	7.28751	3.15746e-13	1.50477e-11	8.77571	7.14766	7.42817	7.65342	7.62714	8.61824	8.34325	8.36917	103	136	133	779	383	418	2.71109	3.49833	3.68199	12.4009	9.23498	9.44801	8.81529	10.912	12.3382	40.575	29.2244	31.1748
445218	NM_001003612,XM_005165921	boka	BCL2-related ovarian killer a	protein_coding	NP_001003612.2;XP_005165978.1	ZDB-GENE-040801-131	.	-2.3074	129.685	0.232444	-5.18952	2.10842e-07	3.56646e-06	6.28834	7.50152	7.25723	7.12467	7.28781	6.72336	6.605	6.55318	172	136	170	134	74	72	2.9296	2.26298	3.0489	1.37153	1.15365	1.03302	9.5258	7.05865	10.2167	4.48755	3.65076	3.40856
445247	NM_001003641	zgc:100911	zgc:100911	protein_coding	NP_001003641.1	ZDB-GENE-040801-162	.	2.94523	48.2371	0.402856	3.86833	0.000109584	0.000871624	6.1704	4.61179	5.01791	5.18578	5.32022	5.69628	5.99076	5.56384	14	21	29	95	98	55	0.399988	0.590851	0.876784	1.70343	2.65169	1.39973	1.30059	1.84298	2.93807	5.57352	8.39136	4.61858
445276	NM_001003731,XM_021468052	zgc:91910	zgc:91910	protein_coding	NP_001003731.1;XP_021323727.1	ZDB-GENE-040808-48	.	-2.04048	303.273	0.26396	-3.89798	9.70001e-05	0.000787903	7.64375	8.66732	8.62815	8.34035	8.33534	7.59648	8.00566	7.99371	459	307	310	195	233	243	22.028	14.3785	15.6221	5.6505	10.2606	9.99009	71.6257	44.8491	52.349	18.4881	32.4701	32.9635
445278	NM_001003733	cldn8	claudin 8	protein_coding	NP_001003733.1	ZDB-GENE-011018-1	.	2.27639	27.3643	0.431756	2.74865	0.00598417	0.0247769	5.24736	4.06555	4.47629	4.47341	4.68652	4.95313	4.84827	4.90371	12	11	21	61	34	40	0.278817	0.24856	0.518119	0.867083	0.732892	0.808577	0.906593	0.775306	1.73619	2.83704	2.31927	2.668
445281	NM_001003736	cyp8b1	cytochrome P450, family 8, subfamily B, polypeptide 1	protein_coding	NP_001003736.1	ZDB-GENE-040808-53	.	-5.4339	34.2449	0.446807	-5.46542	4.61808e-08	8.98238e-07	3.41833	5.85297	5.16578	5.19125	5.38169	4.43266	4.38791	4.64513	46	45	61	13	6	18	1.02494	0.97111	1.42754	0.162768	0.108481	0.327881	3.33267	3.02907	4.78364	0.532568	0.343292	1.08188
445282	NM_001003737	zgc:92041	zgc:92041	protein_coding	NP_001003737.1	ZDB-GENE-040808-55	.	-3.16544	236.36	0.365144	-4.55275	5.29502e-06	6.32182e-05	6.83132	8.48721	8.41505	7.81949	8.05467	6.94478	7.59068	7.06094	453	213	287	104	184	89	21.7782	9.98846	14.532	3.00556	8.12517	3.66476	70.8134	31.1559	48.6961	9.83401	25.7124	12.0923
445292	NM_001003748	sgcg	sarcoglycan, gamma	protein_coding	NP_001003748.2	ZDB-GENE-030724-2	.	-2.28038	230.72	0.34812	-3.41628	0.000634822	0.00386571	7.13703	8.32501	7.78192	8.48622	7.67215	7.27396	7.36815	7.56005	212	451	175	171	131	182	5.24115	10.9395	4.57736	2.55427	2.97727	3.86259	17.042	34.1225	15.3385	8.3574	9.4217	12.7451
445293	NM_001003749,XM_009294620	aqp4	aquaporin 4	protein_coding	NP_001003749.1;XP_009292895.1	ZDB-GENE-040724-152	.	-3.3414	445.473	0.265914	-6.54516	5.943e-11	1.98714e-09	7.685	9.4203	9.20466	9.13119	8.86873	7.80963	8.22688	8.23739	719	621	469	192	239	257	7.53592	6.70752	5.5925	1.16337	2.45628	3.10079	24.5036	20.922	18.7402	3.80648	7.773	10.2314
445310	NM_001003767	tmem179	transmembrane protein 179	protein_coding	NP_001003767.1	ZDB-GENE-040808-25	.	-2.87225	127.997	0.280504	-5.42659	5.74393e-08	1.09497e-06	6.05614	7.5657	7.27666	7.10475	7.28557	6.29332	6.68652	6.44075	184	139	177	70	90	64	6.98365	5.1807	7.08721	1.59772	3.14373	2.09177	22.7078	16.1596	23.749	5.22762	9.94845	6.90205
445315	NM_001327883	chrne	cholinergic receptor, nicotinic, epsilon	protein_coding	NP_001314812.1	ZDB-GENE-040808-32	.	-2.05688	170.77	0.40349	-2.57864	0.00991889	0.0369821	6.803	7.84472	7.46175	8.04036	6.91433	7.07704	6.98337	7.02381	183	338	81	177	103	116	3.09632	5.60179	1.44202	1.81533	1.60336	1.69249	10.0679	17.473	4.83214	5.93963	5.07388	5.58458
445319	NM_001003776,XM_005159585,XM_005159586,XM_009294100	ncaldb	neurocalcin delta b	protein_coding	NP_001003776.1;XP_005159642.1;XP_005159643.1;XP_009292375.1	ZDB-GENE-040808-37	.	-3.90788	1041.18	0.251541	-7.81736	5.39428e-15	3.1691e-13	8.73006	10.695	10.5224	9.95474	10.4204	9.08254	9.34776	9.14011	1864	937	1591	533	515	410	24.2021	12.0458	22.1272	4.46692	6.27795	4.61257	78.6948	37.5732	74.1474	14.6155	19.8668	15.2197
445475	NM_001004112	fhl5	four and a half LIM domains 5	protein_coding	NP_001004112.1	ZDB-GENE-040822-3	.	-5.97958	55.5806	0.449322	-5.74208	9.3519e-09	2.10198e-07	3.95444	6.57982	5.84109	6.09651	6.01665	5.22066	4.77709	4.98896	71	94	86	40	5	15	2.66556	3.473	3.43048	0.905544	0.144881	0.477422	8.66728	10.833	11.4954	2.96288	0.458483	1.57531
445481	NM_001003989,XM_005159427,XM_005159429	s100s	S100 calcium binding protein S	protein_coding	NP_001003989.1;XP_005159484.1;XP_005159486.1	ZDB-GENE-040822-31	.	-2.65548	88.9117	0.33079	-4.25941	2.04964e-05	0.00020623	5.60448	7.01312	6.46021	6.98187	6.463	6.00431	6.07986	5.98167	89	164	85	70	53	47	2.84824	6.0329	2.87281	1.48371	1.5569	1.35925	9.26126	18.8177	9.62666	4.85459	4.92688	4.485
445504	NM_001004118,XM_005157420	gdpd1	glycerophosphodiester phosphodiesterase domain containing 1	protein_coding	NP_001004118.1;XP_005157477.1	ZDB-GENE-040822-22	.	-2.00305	363.619	0.230606	-4.34593	1.38687e-05	0.000147217	7.92139	8.92128	8.92735	8.47002	8.67821	8.0763	8.24124	8.13732	568	311	406	322	269	248	9.59327	5.16447	7.23763	3.28003	4.23254	3.63433	31.1932	16.109	24.253	10.732	13.394	11.9919
445507	NM_001004009	asb12b	ankyrin repeat and SOCS box-containing 12b	protein_coding	NP_001004009.1	ZDB-GENE-040822-25	.	-2.42194	76.2241	0.436353	-2.9246	0.00344897	0.0158484	5.47693	6.7537	6.33645	6.76158	5.94721	5.78892	5.60462	6.05531	90	146	47	61	27	68	2.656	4.22517	1.46453	1.09371	0.735388	1.72148	8.63619	13.1791	4.90759	3.57857	2.32716	5.68024
445509	NM_001004120	nfil3	nuclear factor, interleukin 3 regulated	protein_coding	NP_001004120.1	ZDB-GENE-040822-28	.	2.121	763.494	0.149839	7.23938	4.50727e-13	2.10869e-11	10.0191	8.93479	9.12677	9.24463	9.18315	9.82777	9.83387	9.757	413	451	423	1566	1058	1027	9.3717	9.99212	10.12	21.4826	22.0366	20.0276	30.4727	31.1673	33.9117	70.2898	69.7356	66.0833
446130	NM_001033091	si:ch211-237l4.6	si:ch211-237l4.6	protein_coding	NP_001028263.1	ZDB-GENE-040724-42	.	-4.86855	47.071	0.390232	-5.85162	4.86793e-09	1.16118e-07	4.02	6.2839	5.63044	5.56759	5.96135	4.81476	5.00374	4.92284	61	52	92	18	20	17	3.0759	2.52503	4.9019	0.539259	0.908664	0.725202	10.0015	7.87603	16.4261	1.76442	2.8755	2.39289
447800	NM_001004539	serpinf1	serpin peptidase inhibitor, clade F (alpha-2 antiplasmin, pigment epithelium derived factor), member 1	protein_coding	NP_001004539.1	ZDB-GENE-040912-2	.	-2.39396	258.741	0.261243	-4.82079	1.42992e-06	1.99313e-05	7.25216	8.51189	8.03111	8.53419	8.07835	7.53813	7.49803	7.64314	259	436	261	218	137	179	5.9051	9.71231	6.26241	3.00221	2.86211	3.49351	19.2009	30.2945	20.9851	9.82303	9.05724	11.5273
447808	NM_001004547	fam43b	family with sequence similarity 43, member B	protein_coding	NP_001004547.1	ZDB-GENE-040912-11	.	-2.13104	141.189	0.267191	-4.08532	4.40163e-05	0.000399802	6.49015	7.5886	7.29816	7.52445	7.13997	6.89873	6.64806	6.79042	168	208	130	158	71	95	3.69266	4.45589	3.01619	2.09665	1.41381	1.79255	12.0069	13.8987	10.1071	6.86009	4.47406	5.91473
447809	NM_001004548,XM_009294596	tagapb	T-cell activation RhoGTPase activating protein b	protein_coding	NP_001004548.1;XP_009292871.1	ZDB-GENE-040724-50	.	-2.1278	79.2883	0.258831	-4.20877	2.56764e-05	0.000251734	5.66843	6.75111	6.52266	6.50405	6.41352	5.93346	6.04218	6.01912	104	95	85	67	54	55	1.10943	1.00249	0.961509	0.434402	0.52918	0.499536	3.6074	3.12694	3.22198	1.42134	1.67461	1.64828
447829	NM_001004568,XM_005169526	cdc42ep3	CDC42 effector protein (Rho GTPase binding) 3	protein_coding	NP_001004568.1;XP_005169583.1	ZDB-GENE-040912-89	.	-2.54869	296.195	0.225975	-5.97303	2.32892e-09	5.931e-08	7.38423	8.73243	8.51527	8.5773	8.23525	7.652	7.64661	7.84786	417	419	285	224	148	209	9.85721	9.90683	6.50989	2.89346	2.93297	3.88707	32.0514	30.9012	21.8144	9.46721	9.2815	12.8258
447830	NM_001004569	abhd3	abhydrolase domain containing 3	protein_coding	NP_001004569.1	ZDB-GENE-040912-90	.	-2.042	244.939	0.204203	-5.0439	4.5613e-07	7.08916e-06	7.32765	8.36301	8.01869	8.19491	8.19836	7.69549	7.5289	7.52537	259	300	306	276	146	154	7.85536	8.88865	9.80598	5.06236	4.05628	4.00694	25.5423	27.7254	32.8594	16.5637	12.8362	13.2214
447832	NM_001004571,XM_017351625,XM_017351626,XM_017351627,XM_021467150,XM_021467151	capn3a	calpain 3a, (p94)	protein_coding	NP_001004571.1;XP_017207114.1;XP_017207115.1;XP_017207116.1;XP_021322825.1;XP_021322826.1	ZDB-GENE-040912-97	.	-5.73286	4476.52	0.276178	-9.12184	7.38606e-20	7.28177e-18	10.3767	12.8962	12.3057	12.7873	12.1475	11.0331	10.7417	11.1226	5983	9209	4800	2117	920	1699	80.4769	118.711	66.6968	16.8567	11.3444	19.2134	261.676	370.281	223.498	55.1541	35.8997	63.397
447835	NM_001004574,XM_021479979	cx47.1	connexin 47.1	protein_coding	NP_001004574.1;XP_021335654.1	ZDB-GENE-040912-134	.	-2.59959	40.6269	0.413938	-3.32969	0.000869434	0.00503321	4.49909	5.87383	5.61197	5.51969	5.29724	4.99518	5.155	4.79594	65	53	37	34	32	13	1.18647	1.02427	0.726605	0.365092	0.530855	0.201457	3.85788	3.19489	2.43482	1.19456	1.67991	0.66473
447836	NM_001004575	pfkma	phosphofructokinase, muscle a	protein_coding	NP_001004575.1	ZDB-GENE-040912-135	.	-2.61011	730.09	0.348702	-3.96933	7.20738e-05	0.000612467	8.65974	10.0441	9.4908	10.2521	9.20553	8.94066	8.8637	9.03008	722	1549	488	592	357	472	12.2124	25.6131	8.69604	6.04293	5.53845	6.85636	39.7096	79.8922	29.1401	19.7721	17.5266	22.6234
447843	NM_001004582	ctrl	chymotrypsin-like	protein_coding	NP_001004582.1	ZDB-GENE-040912-147	.	-5.179	129.543	0.337024	-7.04008	1.92131e-12	8.20343e-11	5.39815	7.761	7.55163	6.99976	7.17061	6.04035	6.34157	5.994	274	134	168	52	60	32	14.129	6.77001	9.11626	1.62022	2.79992	1.38286	45.9414	21.1169	30.5482	5.30126	8.86046	4.5629
447865	NM_001004604	zgc:92481	zgc:92481	protein_coding	NP_001004604.1	ZDB-GENE-040912-181	.	2.58616	392.573	0.206086	6.65166	2.89796e-11	1.021e-09	9.14479	7.77541	8.03186	8.13575	8.16762	8.98404	8.93789	8.66411	178	193	205	947	604	466	2.83792	3.00562	3.44149	9.12945	8.83589	6.38709	9.22769	9.37509	11.5323	29.871	27.9615	21.075
447866	NM_001004605	arrdc3b	arrestin domain containing 3b	protein_coding	NP_001004605.1	ZDB-GENE-040912-182	.	5.11634	6429.84	0.170779	13.7904	2.91194e-43	1.59262e-40	13.393	11.0377	11.693	11.5016	11.6212	12.8761	13.112	12.9455	2157	1540	1857	14172	12175	10835	33.77	23.5669	30.6759	134.057	174.851	145.753	109.805	73.5094	102.794	438.625	553.323	480.929
447879	NM_001004618,NM_001327784	nmrk2	nicotinamide riboside kinase 2	protein_coding	NP_001004618.2;NP_001314713.1	ZDB-GENE-040912-44	.	-3.99499	851.216	0.318904	-6.2658	3.70907e-10	1.07849e-08	8.41367	10.4109	9.8953	10.4532	9.49985	8.73517	8.93729	8.93924	1083	1828	657	412	367	390	36.4683	60.2478	23.433	8.5309	11.4624	11.4187	118.579	187.924	78.5229	27.9126	36.273	37.6775
447889	NM_001004628,XM_017358248,XM_021479997	pnp5b	purine nucleoside phosphorylase 5b	protein_coding	NP_001004628.1;XP_017213737.1;XP_021335672.1	ZDB-GENE-040912-54	.	2.14505	721.075	0.169851	6.48221	9.03859e-11	2.93671e-09	9.94222	8.8403	9.17666	9.06512	9.03914	9.67456	9.83937	9.65104	465	376	369	1369	1106	947	8.86783	7.92949	8.22731	22.8788	24.7451	19.7146	28.8344	24.7336	27.5694	74.858	78.3067	65.0508
447890	NM_001004629,XM_005164943	ms4a17a.5	membrane-spanning 4-domains, subfamily A, member 17A.5	protein_coding	NP_001004629.1;XP_005165000.1	ZDB-GENE-040912-55	.	7.38785	53.1564	0.48956	5.89336	3.78415e-09	9.22779e-08	6.54778	3.67306	4.69328	5.16903	4.84649	5.93656	6.04891	5.82586	3	22	8	136	107	84	0.10175	0.841123	0.326455	3.46007	4.11045	2.89526	0.330846	2.62362	1.09394	11.3211	13.0077	9.55325
447893	NM_001004632	anxa3a	annexin A3a	protein_coding	NP_001004632.1	ZDB-GENE-040912-58	.	3.53939	54.4619	0.371013	4.91491	8.88211e-07	1.28889e-05	6.40878	4.58255	5.19297	5.17947	5.41109	5.87481	6.16266	5.83064	18	16	29	109	110	73	0.572329	0.491383	1.00043	2.18403	3.35363	2.07802	1.86097	1.53272	3.3524	7.14599	10.6127	6.85667
447895	NM_001004634	gpx1b	glutathione peroxidase 1b	protein_coding	NP_001004634.2	ZDB-GENE-040912-60	.	2.76343	42.2877	0.355218	4.12834	3.6539e-05	0.000342447	5.95761	4.48725	5.04452	5.12921	4.98507	5.47945	5.61124	5.63259	20	23	16	78	65	71	0.966364	1.10214	0.805944	2.37287	2.98366	3.08189	3.1422	3.43779	2.70069	7.76387	9.4419	10.1691
447897	NM_001004635	ap1s3b	adaptor-related protein complex 1, sigma 3 subunit, b	protein_coding	NP_001004635.1	ZDB-GENE-040912-62	.	2.65443	82.6247	0.341389	4.1255	3.69923e-05	0.000345823	6.90553	5.50342	5.8009	5.93348	6.07449	6.78633	6.58029	6.27191	31	38	50	233	121	83	1.25743	1.47965	2.12719	5.72706	4.50361	2.89822	4.08864	4.61531	7.12814	18.7386	14.2519	9.56302
447903	NM_001004641	dhrs13a.2	dehydrogenase/reductase (SDR family) member 13a, tandem duplicate 2	protein_coding	NP_001004641.1	ZDB-GENE-040912-69	.	-4.57509	146.66	0.336537	-6.51876	7.08919e-11	2.3297e-09	5.7178	7.91103	7.09357	7.24019	7.84382	6.338	6.36918	6.3857	143	161	327	75	52	57	6.03789	6.66111	14.6373	1.90112	1.99051	2.0429	19.6326	20.7773	49.0489	6.22033	6.29903	6.74078
447904	NM_001004642	ildr1b	immunoglobulin-like domain containing receptor 1b	protein_coding	NP_001004642.2	ZDB-GENE-040912-72	.	2.05703	58.54	0.393162	2.64665	0.00812937	0.0315492	6.30178	5.2551	5.41329	5.64782	5.6672	5.65159	6.1561	6.14508	24	37	39	65	96	100	0.390854	0.58262	0.667308	0.630883	1.42261	1.39837	1.27089	1.8173	2.23612	2.06421	4.5019	4.61409
447916	NM_001004654	rrh	retinal pigment epithelium-derived rhodopsin homolog	protein_coding	NP_001004654.1	ZDB-GENE-040912-94	.	-2.26021	29.8281	0.456319	-2.57815	0.00993307	0.0370197	4.20961	5.36297	4.91835	5.13087	4.94363	4.42857	4.6745	4.77303	32	44	32	14	20	27	1.07299	1.4389	1.15268	0.288668	0.614189	0.776506	3.48892	4.4882	3.86258	0.944505	1.94362	2.56217
447923	NM_001004661	aqp8a.1	aquaporin 8a, tandem duplicate 1	protein_coding	NP_001004661.1	ZDB-GENE-040912-106	.	-2.49893	63.9204	0.32863	-4.02065	5.80369e-05	0.000506714	5.19094	6.51274	6.12627	6.3224	6.04668	5.58667	5.47538	5.77334	78	96	66	51	26	51	3.32366	3.97243	2.94593	1.29722	1.02008	1.86666	10.8071	12.3908	9.87167	4.24442	3.22809	6.15926
447933	NM_001004671	uxt	ubiquitously-expressed, prefoldin-like chaperone	protein_coding	NP_001004671.1	ZDB-GENE-040912-118	.	2.24193	101.207	0.260609	4.46931	7.84721e-06	8.92833e-05	7.12821	5.9662	6.21674	6.46994	6.23404	6.88407	6.85955	6.82724	48	69	47	213	139	141	2.425	3.41521	2.48551	6.56414	6.49058	6.1832	7.88505	10.6527	8.32883	21.4775	20.5397	20.4022
448857	XM_001340381,XM_005172083,XM_005172084	trim25l	tripartite motif containing 25, like, transcript variant X2	protein_coding	XP_001340417.5;XP_005172140.1;XP_005172141.1	ZDB-GENE-040914-87	.	2.11765	137.387	0.216665	4.99604	5.85203e-07	8.8848e-06	7.54353	6.46286	6.73047	6.84481	6.72063	7.32931	7.26428	7.31216	76	85	71	284	176	198	0.879316	0.962978	0.869331	1.99978	1.87903	1.97529	2.85916	3.00371	2.91309	6.54315	5.94626	6.51772
448858	NM_001252504	txnipb	thioredoxin interacting protein b	protein_coding	NP_001239433.1	ZDB-GENE-040917-1	.	-3.31135	316.665	0.30078	-5.74313	9.29446e-09	2.09522e-07	7.19643	8.92677	8.55999	8.88866	8.1271	7.73265	7.50512	7.62906	439	590	250	253	120	154	10.0391	13.1876	6.03832	3.49746	2.5151	3.01233	32.6428	41.1347	20.2341	11.4435	7.95912	9.93955
448885	XM_009294188	tril	TLR4 interactor with leucine-rich repeats	protein_coding	XP_009292463.1	ZDB-GENE-131218-1	.	-2.08735	102.911	0.300452	-3.53358	0.000409979	0.00268538	6.05843	7.12078	6.85137	7.07013	6.59555	6.33628	6.24147	6.4703	126	156	84	96	54	84	1.83319	2.22119	1.29146	0.844635	0.714137	1.05343	5.96076	6.92832	4.32761	2.76359	2.25991	3.47592
449541	NM_001005583	ptp4a2a	protein tyrosine phosphatase type IVA, member 2a	protein_coding	NP_001005583.1	ZDB-GENE-040930-1	.	-2.68699	722.58	0.224206	-6.36019	2.0151e-10	6.13097e-09	8.61667	10.0398	9.93076	9.60706	9.7181	8.73173	9.05647	9.02246	1158	756	871	429	448	454	28.8112	18.3667	22.8407	6.43448	10.2133	9.68621	93.6816	57.2891	76.5382	21.0532	32.3204	31.9608
449615	NM_001005603,XM_005162569	gcm2	glial cells missing homolog 2 (Drosophila)	protein_coding	NP_001005603.1;XP_005162626.1	ZDB-GENE-050127-1	.	3.36236	24.8178	0.57113	3.06318	0.00218999	0.0109006	5.25857	3.50515	4.28317	4.12087	4.45388	4.65345	4.5871	4.95824	10	3	17	46	27	59	0.206175	0.062112	0.364641	0.584973	0.512288	1.06165	0.670392	0.19374	1.2219	1.91399	1.62115	3.50303
449651	NM_001005923	stmn2a	stathmin 2a	protein_coding	NP_001005923.2	ZDB-GENE-041010-85	.	-2.0808	2237.78	0.190758	-5.54179	2.99392e-08	6.04335e-07	10.5052	11.5614	11.4538	11.2674	11.3372	10.5376	10.8425	10.8008	3074	2338	2569	1657	1641	1651	63.2905	47.0335	55.7874	20.5993	30.9787	29.1903	205.793	146.706	186.941	67.3996	98.0333	96.3168
449653	NM_001320056,XM_005165925	stk25a	serine/threonine kinase 25a	protein_coding	NP_001306985.1;XP_005165982.1	ZDB-GENE-041010-92	.	-2.0347	207.39	0.209391	-4.89429	9.86615e-07	1.4147e-05	7.09673	8.11844	7.971	7.95703	7.73974	7.28721	7.3612	7.41634	278	256	199	183	136	156	6.13953	5.58953	4.74283	2.53181	2.85735	3.0562	19.9631	17.4348	15.893	8.28392	9.04218	10.0843
449656	NM_001005927,XM_009306607,XM_009306608,XM_009306609,XM_009306610,XM_009306611,XM_021480054	osbpl7	oxysterol binding protein-like 7	protein_coding	NP_001005927.1;XP_009304882.1;XP_009304883.1;XP_009304884.1;XP_009304885.1;XP_009304886.1;XP_021335729.1	ZDB-GENE-041010-212	.	-2.54589	1494.02	0.255995	-5.26638	1.39139e-07	2.43424e-06	9.71865	11.0671	10.9139	10.372	11.0102	10.0924	10.0365	9.90175	2216	1123	2337	1376	858	761	25.5294	12.6633	28.4832	9.65616	9.12435	7.60675	83.0106	39.4992	95.4459	31.5943	28.8743	25.0994
449661	NM_001005932,NM_001122786,XM_021476098	tars	threonyl-tRNA synthetase	protein_coding	NP_001005932.1;NP_001116258.1;XP_021331773.1	ZDB-GENE-041010-218	.	2.89812	1434.81	0.137059	11.2004	4.05895e-29	8.55395e-27	11.059	9.52381	9.92516	9.89116	9.83215	10.7884	10.7898	10.7412	710	635	596	3197	2148	2157	12.0749	10.4833	10.6128	32.6534	33.3757	31.333	39.2625	32.6994	35.5632	106.84	105.619	103.387
449677	NM_001328192	cpt1b	carnitine palmitoyltransferase 1B (muscle)	protein_coding	NP_001315121.1	ZDB-GENE-041010-9	.	-2.0079	470.453	0.309603	-3.24832	0.0011609	0.00639959	8.28856	9.29513	8.79826	9.49888	8.72848	8.56469	8.48066	8.45207	416	863	363	502	301	307	6.20685	12.5861	5.71495	4.519	4.11364	3.93042	20.182	39.2583	19.1506	14.7859	13.0178	12.9689
449679	NM_205738	cav3	caveolin 3	protein_coding	NP_991301.1	ZDB-GENE-050522-426	.	-2.86848	135.19	0.427568	-3.55567	0.000377021	0.0025045	6.12914	7.64665	7.17451	7.72759	6.61005	6.34621	6.46442	6.68221	163	291	71	79	64	96	6.8841	12.0412	3.15609	2.00084	2.45372	3.46999	22.3841	37.5588	10.5759	6.54663	7.76489	11.4496
449707	XM_005160604,XM_021468631,XM_021468632,XM_021468633,XM_021468634	mylk4b	myosin light chain kinase family, member 4b, transcript variant X1	protein_coding	XP_005160661.1;XP_021324306.1;XP_021324307.1;XP_021324308.1;XP_021324309.1	ZDB-GENE-041001-128	.	-4.29739	273.728	0.340244	-6.18222	6.32065e-10	1.78807e-08	6.69294	8.7944	8.15542	8.77715	7.99526	7.10701	7.12371	7.44738	319	592	251	124	84	148	4.81301	8.96112	3.99701	1.13784	1.14327	1.88514	15.6499	27.9514	13.3938	3.72293	3.61793	6.22025
449761	XM_021478432	si:ch211-163l21.8	si:ch211-163l21.8	protein_coding	XP_021334107.1	ZDB-GENE-041008-93	.	2.17677	178.648	0.201045	5.5818	2.38048e-08	4.91745e-07	7.93504	6.81463	7.05209	7.14349	7.15246	7.73535	7.71281	7.62951	93	100	103	379	248	237	0.972773	1.01869	1.1422	2.40854	2.39154	2.13762	3.16304	3.17748	3.82748	7.88059	7.56811	7.05334
449792	NM_001005965	cryba1l2	crystallin, beta A1, like 2	protein_coding	NP_001005965.2	ZDB-GENE-041010-40	.	-4.55675	303.275	0.255666	-8.55805	1.14793e-17	9.12427e-16	6.76778	8.95879	8.47967	8.70998	8.39454	7.3896	7.14152	7.51925	426	514	368	169	73	145	10.95	12.9184	9.96818	2.62712	1.7015	3.18566	35.6049	40.295	33.4029	8.59578	5.38446	10.5115
449806	NM_001005979,XM_005156821	fbln5	fibulin 5	protein_coding	NP_001005979.1;XP_005156878.1	ZDB-GENE-041010-54	.	-2.08408	132.253	0.280065	-3.78274	0.00015511	0.00117312	6.42258	7.4816	7.22433	7.45257	6.95101	6.67274	6.64555	6.78776	162	201	107	121	77	102	2.92021	3.54517	2.04212	1.31673	1.26738	1.56162	9.49529	11.058	6.84306	4.30827	4.01066	5.15276
449833	NM_001006003,XM_021476124	zdhhc15a	zinc finger, DHHC-type containing 15a	protein_coding	NP_001006003.1;XP_021331799.1	ZDB-GENE-041010-87	.	-2.27266	21.1911	0.511768	-2.31429	0.0206518	0.0654154	3.71584	4.87	4.45839	4.4299	4.5699	3.99522	4.22978	4.29046	25	22	30	9	15	19	0.765912	0.654245	0.994758	0.162503	0.419388	0.508803	2.49042	2.04071	3.33339	0.5317	1.32717	1.67886
449839	NM_001006007	nrn1b	neuritin 1b	protein_coding	NP_001006007.1	ZDB-GENE-041010-98	.	-3.11478	28.6614	0.454908	-3.60321	0.000314307	0.00214029	3.82152	5.43245	4.98818	4.79971	5.08561	4.33853	4.60528	4.46317	41	27	46	13	20	14	1.18189	0.749105	1.38057	0.21205	0.523908	0.328237	3.84299	2.3366	4.62622	0.693813	1.65793	1.08306
449866	NM_001258317	si:ch211-39i2.2	si:ch211-39i2.2	protein_coding	NP_001245246.1	ZDB-GENE-041008-126	.	12.6406	725.87	0.201115	18.1986	5.29917e-74	1.35252e-70	10.3937	6.7337	7.80646	7.89932	7.76464	9.68656	9.96415	9.73501	94	104	82	1758	1570	1315	4.11545	4.43207	3.79448	46.6814	63.3088	49.6479	13.3817	13.8245	12.7152	152.739	200.343	163.819
449875	NM_001012251	gsx1	GS homeobox 1	protein_coding	NP_001012251.1	ZDB-GENE-041008-135	.	2.80505	93.0063	0.316025	4.70858	2.49449e-06	3.2267e-05	7.10111	5.60643	6.18021	5.91594	6.1073	6.50766	6.78122	6.92571	54	30	45	145	141	179	1.71118	0.926678	1.50606	2.80738	4.1506	4.92771	5.56404	2.89048	5.04675	9.18557	13.1347	16.2596
449994	NM_001006015	pawr	PRKC, apoptosis, WT1, regulator	protein_coding	NP_001006015.1	ZDB-GENE-041010-108	.	2.13949	656.843	0.161526	6.79314	1.09716e-11	4.1181e-10	9.80613	8.70891	8.89944	9.06296	8.92441	9.56044	9.63716	9.57021	350	406	344	1276	934	917	11.9294	13.5455	12.4017	26.3405	29.257	26.9233	38.7894	42.2509	41.5575	86.1843	92.5848	88.8365
450001	NM_001006022,XM_005161172	zgc:103482	zgc:103482	protein_coding	NP_001006022.1;XP_005161229.1	ZDB-GENE-041010-115	.	2.25299	35.249	0.441598	2.65364	0.00796296	0.0310398	5.60949	4.43796	4.77956	4.68748	5.114	5.2673	5.29052	5.25754	15	10	32	71	50	50	0.433728	0.271395	1.01159	1.30328	1.38518	1.28857	1.4103	0.846533	3.38979	4.26426	4.38346	4.25179
450002	NM_001006023	tecrl2b	trans-2,3-enoyl-CoA reductase-like 2b	protein_coding	NP_001006023.1	ZDB-GENE-041010-116	.	-3.42879	32.9801	0.417037	-4.26269	2.01977e-05	0.000203403	3.91076	5.67016	5.19461	5.32244	5.02056	4.51633	4.63199	4.70933	47	54	33	16	15	20	1.55943	1.74606	1.15087	0.323869	0.456867	0.551902	5.0706	5.4463	3.85651	1.05968	1.44577	1.82106
450007	NM_001006028	fhl2b	four and a half LIM domains 2b	protein_coding	NP_001006028.2	ZDB-GENE-041010-121	.	-4.91626	98.2918	0.359351	-6.39363	1.61989e-10	5.04207e-09	5.06419	7.34986	6.48326	7.15048	6.78828	5.65883	5.88825	5.883	93	201	132	35	38	40	2.2925	4.83962	3.4158	0.512404	0.8552	0.826248	7.45422	15.0957	11.4462	1.67655	2.70631	2.7263
450012	NM_001006033,XM_005167996,XM_021473006,XM_021473081	adprhl1	ADP-ribosylhydrolase like 1	protein_coding	NP_001006033.1;XP_005168053.1;XP_021328681.1;XP_021328756.1	ZDB-GENE-041010-126	.	-2.46925	53.461	0.446588	-2.92008	0.00349938	0.0160224	4.95628	6.2456	5.56434	6.18048	5.77824	5.08858	5.51989	5.40942	42	99	57	24	42	36	0.61099	1.20466	0.663188	0.158276	0.552613	0.46676	1.98668	3.75757	2.22232	0.517869	1.74876	1.54013
450018	NM_001006039,XM_005169164,XM_009305561	samsn1b	SAM domain, SH3 domain and nuclear localisation signals 1b	protein_coding	NP_001006039.2;XP_005169221.1;XP_009303836.1	ZDB-GENE-041010-135	.	-2.92718	326.445	0.231541	-6.69218	2.19869e-11	7.90511e-10	7.37975	8.92584	8.68903	8.34075	8.76117	7.66527	7.83123	7.79806	484	302	499	212	180	182	8.99973	5.87036	9.92983	2.29794	3.01672	2.85886	29.2633	18.3107	33.2744	7.51871	9.54651	9.43316
450019	NM_001006040	hspb7	heat shock protein family, member 7 (cardiovascular)	protein_coding	NP_001006040.1	ZDB-GENE-041010-136	.	-2.06996	58.3729	0.406354	-2.58297	0.00979538	0.0366167	5.25426	6.29607	5.66427	6.28663	5.92885	5.41469	5.73966	5.49803	42	101	62	42	52	35	1.71669	4.06118	2.6942	1.02734	1.97037	1.21106	5.58193	12.6676	9.02814	3.36141	6.23532	3.99603
450041	NM_001006061	ccdc113	coiled-coil domain containing 113	protein_coding	NP_001006061.1	ZDB-GENE-041010-163	.	2.42157	30.5402	0.458835	2.78083	0.00542194	0.0228569	5.43647	4.15177	4.75651	4.74412	4.45746	4.91346	5.15249	5.10767	21	19	7	48	50	49	0.792159	0.683425	0.260545	1.11225	1.75982	1.60411	2.57576	2.13173	0.873074	3.63922	5.56902	5.29294
450051	NM_001006071	tlcd1	TLC domain containing 1	protein_coding	NP_001006071.1	ZDB-GENE-041010-173	.	-3.28484	47.6629	0.447949	-3.8304	0.000127936	0.000993851	4.47442	6.19172	5.67686	5.91059	5.59311	5.04759	4.83276	5.33153	61	80	51	30	9	39	2.64888	3.37913	2.32939	0.779169	0.31946	1.44399	8.61304	10.5401	7.8057	2.54939	1.01094	4.76462
450076	NM_001006096	arl6ip5a	ADP-ribosylation factor-like 6 interacting protein 5a	protein_coding	NP_001006096.1	ZDB-GENE-031113-22	.	-2.12963	36.0229	0.377631	-2.88801	0.00387687	0.0174277	4.52079	5.61735	5.44279	5.22367	5.20034	4.97651	4.94517	4.83303	57	37	36	39	24	19	1.94452	1.22074	1.28985	0.811752	0.753633	0.539298	6.32275	3.80773	4.32223	2.656	2.3849	1.77948
450082	NM_001006102	cyb561d2	cytochrome b561 family, member D2	protein_coding	NP_001006102.1	ZDB-GENE-041010-205	.	-3.19748	23.7401	0.466628	-3.59373	0.000325978	0.00220886	3.49799	5.17721	4.8474	4.5196	4.66028	4.24087	4.25065	4.18718	44	22	30	18	12	10	1.49162	0.698332	1.04206	0.356193	0.353421	0.287684	4.8501	2.17823	3.4919	1.16544	1.11841	0.949248
474318	NM_001020493	irx4b	iroquois homeobox 4b	protein_coding	NP_001018329.2	ZDB-GENE-040712-4	.	2.2696	115.515	0.261942	4.51413	6.35781e-06	7.42099e-05	7.32518	6.14303	6.5953	6.34601	6.50278	7.11584	6.90183	7.12962	77	47	63	255	130	185	1.79616	1.06448	1.55625	3.61795	2.7974	3.72065	5.84033	3.3203	5.21493	11.8377	8.85249	12.2767
474328	NM_001007058	crygm5	crystallin, gamma M5	protein_coding	NP_001007059.1	ZDB-GENE-041024-6	.	-12.2799	173.796	0.339434	-10.6596	1.5728e-26	2.5992e-24	4.72748	8.32688	7.74559	7.84133	7.44498	5.8	5.9086	6.21761	311	323	212	24	20	45	12.8647	13.084	9.22729	0.590525	0.743736	1.57843	41.8304	40.8114	30.9203	1.93216	2.35358	5.20821
474346	NM_001007062,NM_001313857,XM_021481389,XM_021481390,XM_021481391,XM_021481392,XM_021481393,XM_021481394,XM_021481395	mag	myelin associated glycoprotein	protein_coding	NP_001007063.2;NP_001300786.1;XP_021337064.1;XP_021337065.1;XP_021337066.1;XP_021337067.1;XP_021337068.1;XP_021337069.1;XP_021337070.1	ZDB-GENE-041217-24	.	-2.08607	1105.91	0.229701	-4.61811	3.87252e-06	4.76463e-05	9.48595	10.5457	10.3189	10.5218	10.1162	9.57802	9.90882	9.63185	1344	1575	1013	882	901	672	17.1752	19.0475	13.166	6.62463	10.3074	7.68902	55.8463	59.4128	44.1188	21.6754	32.6183	25.3708
474350	NM_001007064	dmrta2	DMRT-like family A2	protein_coding	NP_001007065.2	ZDB-GENE-041116-2	.	2.81005	74.259	0.364826	4.08577	4.39303e-05	0.000399495	6.77629	5.28185	5.83065	5.4606	5.95966	6.32833	6.4576	6.4535	40	15	48	143	115	121	1.22643	0.434979	1.55821	2.66306	3.24875	3.20225	3.98784	1.35678	5.2215	8.71337	10.2808	10.5662
492328	NM_001007294	ankrd9	ankyrin repeat domain 9	protein_coding	NP_001007295.1	ZDB-GENE-041114-3	.	-4.66888	216.436	0.289365	-7.68261	1.55881e-14	8.60753e-13	6.25256	8.47827	7.89278	8.35902	7.74785	6.90254	6.78292	6.94667	277	436	222	118	63	89	10.3911	15.9869	8.77392	2.66379	2.14241	2.86579	33.7873	49.866	29.4011	8.71577	6.77972	9.45601
492331	NM_001007297,XM_005169359,XM_005169360	ace2	angiotensin I converting enzyme 2	protein_coding	NP_001007298.1;XP_005169416.1;XP_005169417.1	ZDB-GENE-041114-6	.	-2.90938	197.661	0.254525	-6.05327	1.41932e-09	3.7648e-08	6.6638	8.19933	8.02154	7.58656	7.95779	6.97062	7.14753	7.09112	319	177	282	128	112	109	5.52611	2.98816	5.14779	1.31904	1.74746	1.52974	17.9686	9.32064	17.25	4.31582	5.52991	5.04757
492334	NM_001007300	slc5a11	solute carrier family 5 (sodium/inositol cotransporter), member 11	protein_coding	NP_001007301.1	ZDB-GENE-041114-9	.	-2.28298	36.773	0.394182	-3.02124	0.00251745	0.0122207	4.49229	5.67353	5.2659	5.50398	5.17727	4.81753	4.89833	5.02286	42	58	34	26	21	30	0.77137	1.03693	0.657717	0.289267	0.351539	0.467518	2.50817	3.23439	2.20398	0.946465	1.11246	1.54263
492345	NM_001007311,NM_001243173,NM_001243174,NM_001243176	hmgn3	high mobility group nucleosomal binding domain 3	protein_coding	NP_001007312.1;NP_001230102.1;NP_001230103.1;NP_001230105.1	ZDB-GENE-041114-180	.	-4.28211	2223.29	0.224051	-9.36538	7.57738e-21	8.09582e-19	9.71832	11.8155	11.4465	11.606	11.2201	10.0094	10.2686	10.3408	3327	3683	2477	923	894	1044	120.419	129.675	94.3463	20.5172	30.228	32.9037	391.551	404.482	316.151	67.131	95.6577	108.57
492356	NM_001007322,XM_005164739,XM_009300266,XM_009300272,XM_009300273,XM_009300276,XM_017355005,XM_017355006,XM_017355007,XM_021475002,XM_021475003,XM_021475004,XM_021475005,XM_021475006,XM_021475007	mybpc1	myosin binding protein C, slow type	protein_coding	NP_001007323.1;XP_005164796.1;XP_009298541.1;XP_009298547.1;XP_009298548.1;XP_009298551.1;XP_017210494.1;XP_017210495.1;XP_017210496.1;XP_021330677.1;XP_021330678.1;XP_021330679.1;XP_021330680.1;XP_021330681.1;XP_021330682.1	ZDB-GENE-041114-196	.	-2.6899	1858.73	0.237911	-6.00036	1.96878e-09	5.0587e-08	9.97643	11.4041	10.9744	11.4501	10.8611	10.3002	10.2824	10.2937	2088	3271	1746	1502	983	1057	21.1125	32.3671	17.9891	8.764	9.12676	9.00875	68.6487	100.959	60.2807	28.6753	28.882	29.7254
492358	NM_001007324,XM_005170175	cx28.9	connexin 28.9	protein_coding	NP_001007325.1;XP_005170232.1	ZDB-GENE-041114-200	.	-4.46056	27.4084	0.476858	-4.52383	6.07307e-06	7.12849e-05	3.29095	5.49279	4.98252	4.77507	4.97029	4.42109	4.22973	4.21529	46	30	43	23	7	7	0.819917	0.513343	0.80644	0.2461	0.107424	0.097893	2.66602	1.60121	2.70235	0.805224	0.339946	0.32301
492460	NM_001007332	trmt10c	tRNA methyltransferase 10C, mitochondrial RNase P subunit	protein_coding	NP_001007333.2	ZDB-GENE-041114-12	.	2.281	153.79	0.260581	4.56545	4.98426e-06	5.98814e-05	7.73946	6.55273	6.6548	6.87578	7.05868	7.54179	7.4538	7.42727	59	80	107	341	206	211	1.6749	2.20311	3.19709	5.85092	5.35165	5.15697	5.44606	6.8719	10.7133	19.1438	16.9355	17.016
492474	NM_001007346	dennd2db	DENN/MADD domain containing 2Db	protein_coding	NP_001007347.1	ZDB-GENE-041114-34	.	2.12061	51.4756	0.345097	3.14254	0.0016749	0.00873739	6.13056	5.03955	5.47368	5.23439	5.51449	5.73173	5.87278	5.90497	34	18	35	87	73	81	0.810135	0.412696	0.878887	1.27378	1.62713	1.6873	2.63421	1.28728	2.94511	4.16771	5.14912	5.56745
492479	NM_001007351,NM_001326706,NM_001326707,NM_001326708	btg3	B-cell translocation gene 3	protein_coding	NP_001007352.1;NP_001313635.1;NP_001313636.1;NP_001313637.1	ZDB-GENE-031113-19	.	2.65003	298.118	0.234342	5.99981	1.97542e-09	5.07011e-08	8.75843	7.35026	7.88884	7.70175	7.4954	8.37761	8.53493	8.49437	192	138	102	572	461	466	6.52762	4.64669	3.65573	11.807	14.4498	13.6549	21.225	14.4939	12.2502	38.6319	45.7269	45.0561
492485	NM_001007357,XM_005172993,XM_005172994,XM_005172995,XM_005172996,XM_021480055,XM_021480056,XM_021480057,XM_021480058,XM_021480059,XM_021480060,XM_021480061	lrrc20	leucine rich repeat containing 20	protein_coding	NP_001007358.1;XP_005173050.2;XP_005173051.2;XP_005173052.2;XP_005173053.2;XP_021335730.1;XP_021335731.1;XP_021335732.1;XP_021335733.1;XP_021335734.1;XP_021335735.1;XP_021335736.1	ZDB-GENE-041114-49	.	-2.10256	328.916	0.256858	-4.1741	2.99163e-05	0.000286576	7.72782	8.8004	8.54385	8.81105	8.28642	7.96611	7.84373	8.10767	395	502	275	308	173	264	21.5469	26.5635	15.6029	9.83755	8.1413	11.7498	70.0612	82.8566	52.2847	32.1878	25.7635	38.7699
492486	NM_001007358	adra1bb	adrenoceptor alpha 1Bb	protein_coding	NP_001007359.1	ZDB-GENE-041114-51	.	-2.34585	18.0272	0.506808	-2.42717	0.0152172	0.0514882	3.41485	4.66614	4.27608	4.16039	4.33515	4.04218	3.95164	3.88839	24	17	26	21	10	8	0.572444	0.388394	0.655791	0.299492	0.212016	0.153052	1.86134	1.21147	2.19753	0.97992	0.670933	0.505012
492494	NM_001007366	vsnl1a	visinin-like 1a	protein_coding	NP_001007367.1	ZDB-GENE-041001-211	.	-2.57014	1977.97	0.178626	-7.62402	2.45897e-14	1.33219e-12	10.1146	11.4754	11.356	11.1369	11.1439	10.2929	10.5088	10.4515	3022	2225	2278	1379	1225	1206	39.9967	28.7897	31.8049	11.0209	14.8702	13.7105	130.052	89.8006	106.577	36.0596	47.0573	45.2395
492500	NM_001007372	gsto2	glutathione S-transferase omega 2	protein_coding	NP_001007373.1	ZDB-GENE-041114-67	.	2.32293	87.8776	0.298864	4.06855	4.73059e-05	0.00042386	6.93893	5.72957	5.96067	6.25435	6.06405	6.79818	6.61985	6.50717	37	59	43	219	117	106	1.66103	2.57114	2.02513	5.96619	4.82742	4.1002	5.40095	8.01988	6.78612	19.521	15.2766	13.5291
492503	NM_001007375	si:dkey-42i9.4	si:dkey-42i9.4	protein_coding	NP_001007376.2	ZDB-GENE-030131-8398	.	3.59867	521.211	0.159632	11.5733	5.62991e-31	1.34395e-28	9.67215	7.82385	8.30219	8.29388	8.28989	9.27027	9.39534	9.3081	209	193	195	1130	871	838	10.3773	9.40034	10.234	34.0042	39.7896	35.8729	33.7424	29.3214	34.2936	111.26	125.916	118.367
492509	NM_001007381,XM_005168000	pcid2	PCI domain containing 2	protein_coding	NP_001007382.1;XP_005168057.1	ZDB-GENE-041114-79	.	2.09566	192.782	0.223084	4.78474	1.71207e-06	2.3134e-05	8.02683	6.96298	7.16852	7.26966	7.28286	7.93764	7.79194	7.6355	102	111	115	455	257	224	2.72625	2.92099	3.26263	7.37352	6.35645	5.20102	8.86461	9.11112	10.9329	24.1257	20.1152	17.1614
492515	NM_001007387	ftr72	finTRIM family, member 72	protein_coding	NP_001007388.2	ZDB-GENE-041114-86	.	2.21474	21.4547	0.475018	2.41494	0.015738	0.0528589	4.88684	3.7359	4.20122	4.29355	4.19117	4.48215	4.66209	4.43387	11	14	10	39	38	25	0.265868	0.331202	0.257024	0.579891	0.857877	0.52613	0.864487	1.03308	0.861277	1.89737	2.71479	1.73603
492516	NM_001007388	ttc36	tetratricopeptide repeat domain 36	protein_coding	NP_001007389.1	ZDB-GENE-041114-87	.	-3.00032	27.6733	0.437254	-3.62516	0.000288783	0.00199208	3.78418	5.37746	4.81023	5.06781	4.85177	4.47821	4.50009	4.35043	31	46	32	23	16	10	1.87159	2.68645	2.00362	0.830938	0.863484	0.505264	6.0856	8.37955	6.71404	2.71878	2.73253	1.66718
492517	NM_001007389,XM_021477514,XM_021477515	zgc:103586	zgc:103586	protein_coding	NP_001007390.1;XP_021333189.1;XP_021333190.1	ZDB-GENE-041114-88	.	-4.18199	109.542	0.290804	-7.0982	1.26391e-12	5.55128e-11	5.40534	7.46519	6.94342	7.25862	6.79677	6.00266	6.09978	6.06807	147	201	116	57	45	45	2.03455	3.12561	1.97306	0.831474	0.897967	0.726544	6.61548	9.74936	6.61164	2.72053	2.84165	2.39732
492518	NM_001007390,XM_005156599	haao	3-hydroxyanthranilate 3,4-dioxygenase	protein_coding	NP_001007391.1;XP_005156656.1	ZDB-GENE-041114-89	.	-2.52248	124.458	0.280374	-4.76095	1.92682e-06	2.57871e-05	6.1517	7.47428	7.21586	7.14275	7.14637	6.31861	6.73832	6.46241	172	147	150	74	98	67	3.07541	2.51528	2.92235	0.715858	1.45141	1.58792	9.99992	7.84563	9.79268	2.34224	4.59303	5.23953
492519	NM_001007391,NM_001291706,XM_005163430	fam173b	family with sequence similarity 173, member B	protein_coding	NP_001007392.2;NP_001278635.1;XP_005163487.1	ZDB-GENE-041114-90	.	-2.16599	37.4594	0.453041	-2.4612	0.0138474	0.0478687	4.58023	5.67235	5.24915	5.35468	5.39728	4.70882	5.20594	4.86714	40	45	49	18	40	20	1.38367	1.54411	1.81025	0.370766	1.28779	0.555339	4.49911	4.81636	6.06608	1.21312	4.07527	1.83241
492617	NM_001079953	isoc2	isochorismatase domain containing 2	protein_coding	NP_001073422.2	ZDB-GENE-070518-1	.	-2.00736	102.75	0.279958	-3.59089	0.000329548	0.00222845	6.09985	7.09713	6.91054	6.91979	6.70998	6.21584	6.34643	6.54442	135	128	98	77	64	93	6.47883	6.00379	4.98856	2.24107	2.81864	3.83825	21.0664	18.7269	16.7165	7.33265	8.9197	12.6647
492631	NM_001130597	zgc:193538	zgc:193538	protein_coding	NP_001124069.1	ZDB-GENE-041111-206	.	-2.28222	41.8556	0.362804	-3.28121	0.00103363	0.0058024	4.67434	5.86238	5.42615	5.41004	5.7094	5.05656	5.05845	5.16056	45	41	67	35	23	31	2.54269	2.25125	4.03679	1.2111	1.20021	1.50748	8.26774	7.02208	13.5271	3.96263	3.7981	4.97411
492763	NM_001007404	casp9	caspase 9, apoptosis-related cysteine protease	protein_coding	NP_001007405.2	ZDB-GENE-030825-5	.	2.75079	369.691	0.201335	7.25084	4.14208e-13	1.94975e-11	9.08336	7.62151	8.06799	7.94188	7.95228	8.6915	8.95842	8.70738	201	157	162	711	646	515	5.09353	3.89115	4.33837	10.904	15.0284	11.2301	16.562	12.1372	14.5377	35.6773	47.5579	37.055
492766	NM_001007407,NM_001045229,XM_017355009,XM_021475010	svopl	SVOP-like	protein_coding	NP_001007408.2;NP_001038694.1;XP_017210498.1;XP_021330685.1	ZDB-GENE-041114-109	.	2.07693	66.0333	0.386776	2.72626	0.00640564	0.0261636	6.47875	5.42224	5.51618	5.84855	5.86415	6.01702	6.43207	6.04411	22	44	46	101	126	75	0.34047	0.550174	0.630881	0.837218	1.62037	0.920662	1.10706	1.71609	2.11406	2.73932	5.12773	3.03783
492767	NM_001007408	ccdc114	coiled-coil domain containing 114	protein_coding	NP_001007409.1	ZDB-GENE-041114-110	.	2.68451	124.509	0.250924	5.67766	1.36546e-08	2.95906e-07	7.50309	6.07917	6.44428	6.38707	6.65105	7.21972	7.23002	7.11424	56	47	75	277	189	173	1.35819	1.10143	1.89563	4.05585	4.18572	3.60374	4.41625	3.43556	6.35217	13.2705	13.2459	11.891
493612	NM_001007772	zgc:101810	zgc:101810	protein_coding	NP_001007773.1	ZDB-GENE-041121-7	.	3.99271	220.319	0.313591	6.36934	1.89844e-10	5.8223e-09	8.46037	6.46609	6.86448	7.00509	7.15763	8.3447	8.06051	7.64691	62	74	96	715	351	227	1.90079	2.23254	3.12802	13.3549	9.94385	6.03234	6.18056	6.96371	10.4819	43.6962	31.4677	19.9044
493627	NM_001007782	nkx2.2b	NK2 homeobox 2b	protein_coding	NP_001007783.2	ZDB-GENE-050217-3	.	2.42922	48.7866	0.339463	3.7721	0.000161877	0.001214	6.11281	4.82619	5.34107	5.1555	5.36563	5.70051	5.84731	5.78273	29	17	29	90	76	73	0.806614	0.462704	0.843826	1.5248	1.97031	1.76128	2.62276	1.44326	2.82762	4.98905	6.23511	5.81156
493629	NM_001007784	crygn1	crystallin, gamma N1	protein_coding	NP_001007785.1	ZDB-GENE-050225-1	.	-6.40208	28.6141	0.452682	-5.91705	3.27767e-09	8.11329e-08	2.95755	5.62819	4.92331	5.05959	4.95182	4.21641	4.30815	4.18992	41	48	41	11	10	6	2.12137	2.40695	2.22592	0.328791	0.45229	0.230244	6.89778	7.50772	7.45897	1.07578	1.43129	0.759716
494039	NM_001008582	c3a.6	complement component c3a, duplicate 6	protein_coding	NP_001008582.4	ZDB-GENE-041212-2	.	5.44078	591.564	0.27302	8.95103	3.52176e-19	3.21025e-17	9.96512	7.52033	8.13459	7.97855	8.32645	9.25688	9.8152	9.40137	162	117	205	1107	1351	923	1.37723	0.970097	1.84744	5.70957	10.5796	6.76934	4.47816	3.02591	6.19068	18.6814	33.4794	22.3362
494042	NM_001008585,XM_009305270	slc43a2b	solute carrier family 43 (amino acid system L transporter), member 2b	protein_coding	NP_001008585.1;XP_009303545.1	ZDB-GENE-041212-6	.	3.46118	2442.91	0.227731	7.86571	3.67e-15	2.22437e-13	11.8883	10.0967	10.4861	10.466	10.5697	11.2623	11.8371	11.4856	970	883	1031	4050	5051	3683	11.68	10.2295	13.2307	41.988	70.1271	47.042	37.9785	31.9076	44.3357	137.382	221.92	155.221
494053	NM_001008596,XM_005169637,XM_005169638,XM_009291320,XM_021481397,XM_021481398	lxn	latexin	protein_coding	NP_001008596.1;XP_005169694.1;XP_005169695.1;XP_009289595.1;XP_021337072.1;XP_021337073.1	ZDB-GENE-041212-18	.	2.37036	349.343	0.184024	6.76601	1.32381e-11	4.88893e-10	8.94117	7.69448	8.03408	8.02543	7.95362	8.6124	8.81135	8.6326	197	182	167	662	559	482	9.17115	8.30812	8.28972	20.4123	22.8218	18.6773	29.8206	25.9146	27.7785	66.7877	72.2203	61.6281
494064	NM_001008607	hsdl1	hydroxysteroid dehydrogenase like 1	protein_coding	NP_001008607.1	ZDB-GENE-041212-31	.	-6.19636	33.6176	0.504359	-5.21736	1.81491e-07	3.10195e-06	3.24346	5.85211	5.41617	5.29445	4.7831	4.3078	4.44826	4.42977	72	57	24	10	11	11	1.99083	1.55286	0.695409	0.158036	0.274538	0.253111	6.47332	4.84367	2.33028	0.517085	0.868784	0.83517
494075	NM_001008618,XM_005171844	oclnb	occludin b	protein_coding	NP_001008618.1;XP_005171901.1	ZDB-GENE-041212-43	.	2.46815	65.4903	0.388157	3.358	0.000785088	0.00461825	6.54262	5.23868	5.46254	5.50961	5.93534	6.13697	6.36785	6.09284	22	23	54	124	115	83	0.39749	0.391117	1.01996	1.34564	1.9082	1.28084	1.29247	1.21997	3.41784	4.40285	6.03859	4.2263
494087	NM_001008630,XM_005172586	nxnl2	nucleoredoxin-like 2	protein_coding	NP_001008630.1;XP_005172643.2	ZDB-GENE-041212-55	.	-2.12641	133.151	0.254567	-4.27558	1.90637e-05	0.000193424	6.41279	7.50066	7.40118	7.18046	7.141	6.68681	6.58071	6.84087	200	142	137	122	68	109	9.12876	6.38792	6.62354	3.39135	2.84086	4.27833	29.6828	19.9251	22.1952	11.0963	8.99	14.1169
494088	NM_001008631,XM_021466680,XR_002455714	jazf1b	JAZF zinc finger 1b	protein_coding	NP_001008631.1;XP_021322355.1	ZDB-GENE-041212-56	.	-2.20508	580.818	0.185612	-6.14633	7.92977e-10	2.21062e-08	8.50383	9.6414	9.46712	9.34037	9.4303	8.60668	8.83031	8.85024	774	627	706	430	389	423	6.97487	5.68943	6.71866	2.35494	3.21816	3.44392	22.6793	17.7464	22.5139	7.70523	10.184	11.3636
494090	NM_001008633,XM_005163493,XM_009298615	bfsp2	beaded filament structural protein 2, phakinin	protein_coding	NP_001008633.1;XP_005163550.1;XP_009296890.1	ZDB-GENE-041212-58	.	-3.4135	3817.42	0.304459	-5.8177	5.96645e-09	1.39852e-07	10.7563	12.5278	11.9283	12.6061	11.8539	11.2331	10.8962	11.2556	4068	7820	3559	2875	1219	2101	100.709	198.591	97.1258	45.0485	28.7406	46.2942	327.462	619.442	325.464	147.396	90.9506	152.753
494097	NM_001008640	mgme1	mitochondrial genome maintenance exonuclease 1	protein_coding	NP_001008640.1	ZDB-GENE-041212-68	.	-4.80851	118.327	0.358584	-6.31816	2.6469e-10	7.91692e-09	5.33242	7.61737	6.88279	7.39488	7.04608	6.28605	5.97257	5.8615	132	228	154	91	33	27	4.56004	7.73245	5.61364	1.90682	1.03182	0.791138	14.8273	24.1189	18.8111	6.23899	3.26524	2.61045
494129	NM_205586	prnpa	prion protein a	protein_coding	NP_991149.1	ZDB-GENE-041217-6	.	-6.14611	111.359	0.439031	-5.96694	2.41743e-09	6.12923e-08	4.96843	7.58053	7.35582	6.25317	7.13505	5.69877	5.93011	5.74916	258	60	192	38	40	29	12.6054	2.86464	9.91096	1.10062	1.75467	1.19081	40.9874	8.93535	33.2112	3.60117	5.55273	3.92924
494176	NM_001009912	rdh12l	retinol dehydrogenase 12, like	protein_coding	NP_001009912.1	ZDB-GENE-040801-48	.	3.39589	35.2755	0.553001	3.18949	0.00142524	0.00762973	5.76592	4.01225	4.5739	4.9982	4.47991	5.49167	5.08124	5.25194	9	28	5	108	38	54	0.319136	0.989594	0.159215	2.37302	1.26688	1.66974	1.03769	3.08673	0.533521	7.76437	4.0091	5.50951
494451	NM_001009558,NM_001018118,XM_005157517,XM_005157518,XM_009291645	il15l	interleukin 15, like	protein_coding	NP_001009558.1;NP_001018128.2;XP_005157574.1;XP_005157575.1;XP_009289920.1	ZDB-GENE-041111-173	.	-2.51344	38.9618	0.440848	-3.01615	0.00256004	0.0123751	4.48086	5.79687	5.28733	5.39254	5.54109	4.76233	4.83622	5.18605	41	46	59	20	16	39	1.1835	1.1156	1.60125	0.297862	0.404636	0.94021	3.84823	3.47975	5.36573	0.974586	1.28049	3.10233
494473	NR_029993,rna-mir1-1	mir1-1	microRNA 1-1	miRNA	.	ZDB-GENE-041228-15	.	-5.42518	14.9023	0.631179	-3.86526	0.00011097	0.00088014	2.22901	4.65056	3.95184	4.11472	3.81729	3.44896	3.45831	3.58814	22	29	15	5	3	8	8.72243	11.0776	5.98533	0.844345	0.605878	2.52218	28.3616	34.5532	20.0566	2.76264	1.91732	8.32223
494476	NM_001009916	tfr2	transferrin receptor 2	protein_coding	NP_001009916.1	ZDB-GENE-041220-3	.	4.58741	156.008	0.219711	10.0026	1.48446e-23	2.01607e-21	8.00086	5.80386	6.46035	6.50883	6.51054	7.57346	7.59873	7.5304	48	49	50	379	263	257	0.923894	0.909693	1.00959	4.41116	4.64703	4.25559	3.00411	2.8375	3.3831	14.433	14.7057	14.0418
494477	NM_001009917,XM_005163666	tfr1a	transferrin receptor 1a	protein_coding	NP_001009917.1;XP_005163723.1	ZDB-GENE-041220-1	.	-2.5609	637.701	0.215619	-6.29189	3.13626e-10	9.27196e-09	8.48537	9.84081	9.53043	9.75778	9.39778	8.69412	8.74348	8.94799	798	961	652	457	327	455	4.45577	5.10468	3.88444	2.47255	1.71642	2.30195	14.4883	15.9224	13.0166	8.09003	5.43166	7.59556
494487	NM_205729	nr1d1	nuclear receptor subfamily 1, group d, member 1	protein_coding	NP_991292.2	ZDB-GENE-050105-1	.	-4.5298	830.69	0.177899	-12.251	1.65903e-34	4.76369e-32	8.23053	10.4105	10.0396	9.91245	10.0859	8.81207	8.8577	8.65484	1275	1040	1274	466	332	261	18.9793	15.1209	20.0012	4.18874	4.52521	3.33233	61.7127	47.1648	67.0233	13.7053	14.3202	10.9954
494534	NM_001009990	cdc40	cell division cycle 40 homolog (S. cerevisiae)	protein_coding	NP_001009990.1	ZDB-GENE-050116-3	.	2.03108	582.033	0.182628	5.59742	2.1757e-08	4.54345e-07	9.60718	8.58551	8.68456	8.82941	8.93767	9.42379	9.45705	9.32106	291	331	387	1178	821	744	6.40482	7.1391	8.99796	15.7036	16.62	14.104	20.8257	22.2682	30.1518	51.3813	52.5945	46.5377
494572	NM_001011660	guca1g	guanylate cyclase activator 1g	protein_coding	NP_001011660.1	ZDB-GENE-050120-1	.	-4.94985	139.27	0.270339	-8.53516	1.3996e-17	1.09727e-15	5.56142	7.85373	7.46301	7.19341	7.47537	6.11389	6.35001	6.34668	231	157	223	51	53	56	18.0109	11.971	18.2817	2.38214	3.73781	3.74755	58.5637	37.3399	61.2613	7.79422	11.8284	12.3655
494573	NM_001011661	guca1d	guanylate cyclase activator 1d	protein_coding	NP_001011661.1	ZDB-GENE-040724-231	.	-8.51887	99.2284	0.375926	-8.22145	2.01049e-16	1.37449e-14	4.39313	7.47123	6.92489	6.47988	7.08067	5.45318	5.69848	5.38357	175	95	199	27	31	14	13.8024	7.27284	16.483	1.28338	2.19273	0.936057	44.8795	22.6853	55.2339	4.19914	6.93898	3.08863
497283	NM_001012371,XM_005161350,XM_021468817	hif1al2	hypoxia-inducible factor 1, alpha subunit, like 2	protein_coding	NP_001012371.2;XP_005161407.1;XP_021324492.1	ZDB-GENE-050211-2	.	-6.12498	158.544	0.270641	-9.66115	4.40874e-22	5.24732e-20	5.46895	8.09168	7.32767	7.69029	7.68316	6.3431	6.19177	6.36426	185	264	266	72	34	52	2.97096	3.9813	4.6805	0.669076	0.479566	0.683545	9.66029	12.4184	15.6842	2.18917	1.51761	2.25544
497538	NR_120358	si:ch211-147k10.6	si:ch211-147k10.6	lncRNA	.	ZDB-GENE-050208-254	.	-2.14384	218.682	0.303501	-3.62503	0.000288932	0.00199251	7.12091	8.22002	8.0125	7.52118	8.24445	7.33092	7.33984	7.47107	287	144	357	191	129	165	8.56758	4.20156	11.2496	3.43787	3.51928	4.23439	27.8581	13.1055	37.6968	11.2485	11.1369	13.9719
497601	NM_001267589	tnks1bp1	tankyrase 1 binding protein 1	protein_coding	NP_001254518.1	ZDB-GENE-050208-317	.	2.10014	104.613	0.300318	3.56452	0.000364528	0.00243106	7.14804	6.07455	6.27257	6.39562	6.46349	6.74366	7.14071	6.72327	51	59	67	172	193	119	0.480741	0.543645	0.671239	0.993273	1.69106	0.973613	1.56316	1.69573	2.24929	3.24993	5.35142	3.21255
497645	NM_001012385,XM_005156825,XM_005156826,XM_005156827	matn3b	matrilin 3b	protein_coding	NP_001012385.1;XP_005156882.1;XP_005156883.1;XP_005156884.1	ZDB-GENE-050221-9	.	-2.0475	94.1623	0.517106	-1.99933	0.0455728	0.119832	5.94755	6.98424	6.21764	7.26789	5.99499	6.24527	6.10658	6.1124	62	227	40	105	56	60	1.79371	6.6196	1.07132	1.91091	1.31665	1.51912	5.83237	20.6478	3.58996	6.25237	4.16658	5.0125
497646	NM_001012386	gadd45bb	growth arrest and DNA-damage-inducible, beta b	protein_coding	NP_001012386.1	ZDB-GENE-050223-1	.	2.17096	206.032	0.25213	4.43554	9.18406e-06	0.000102411	8.14047	7.02107	7.23991	7.51253	7.13432	7.75589	7.9647	7.95463	107	148	86	350	303	317	3.91711	5.31221	3.31866	7.76594	10.2079	9.97721	12.7368	16.5698	11.1207	25.4097	32.3032	32.921
503514	NM_001126478,XM_005167165,XM_005167166	angptl2b	angiopoietin-like 2b	protein_coding	NP_001119950.1;XP_005167222.1;XP_005167223.1	ZDB-GENE-050624-1	.	-2.29731	344.344	0.285199	-4.2074	2.58322e-05	0.000253046	7.70803	8.90566	8.56793	8.93595	8.35344	7.79033	7.95538	8.17191	399	567	293	234	198	281	4.43151	6.06282	3.42611	1.55227	2.02973	2.63155	14.4094	18.9111	11.4807	5.07892	6.42316	8.68311
503565	NM_001012618	drd4b	dopamine receptor D4b	protein_coding	NP_001012636.1	ZDB-GENE-070508-3	.	-5.00467	111.521	0.268028	-8.66804	4.39616e-18	3.64564e-16	5.2126	7.53886	7.10907	6.85408	7.17402	5.99145	5.95214	5.99858	181	124	186	57	34	40	6.74989	4.51198	7.32374	1.27073	1.14052	1.25307	21.9478	14.0737	24.5415	4.15775	3.60921	4.13464
503594	NM_001013282,XM_005164209	il4r.1	interleukin 4 receptor, tandem duplicate 1	protein_coding	NP_001013300.1;XP_005164266.1	ZDB-GENE-050227-5	.	2.37673	278.271	0.245456	5.08839	3.61115e-07	5.74857e-06	8.61393	7.36417	7.54616	7.87832	7.56948	8.18273	8.48126	8.36956	124	186	122	472	450	419	3.16888	4.71299	2.83468	6.55751	9.99231	8.87065	10.3038	14.7007	9.4989	21.4558	31.621	29.2698
503707	NM_001013301,XM_005157923,XM_017351344	upp1	uridine phosphorylase 1	protein_coding	NP_001013319.1;XP_005157980.1;XP_017206833.1	ZDB-GENE-050306-2	.	-2.37546	125.671	0.234305	-5.32729	9.96895e-08	1.79464e-06	6.22262	7.46486	7.21921	7.10578	7.21525	6.48109	6.5445	6.68486	169	137	160	95	70	93	4.1092	3.44083	4.218	1.35255	1.57354	2.0166	13.3613	10.7326	14.1343	4.42546	4.97954	6.654
503739	NM_001328208,XM_009293553,XM_021467640,XM_021467641	hsf4	heat shock transcription factor 4	protein_coding	NP_001315137.1;XP_009291828.1;XP_021323315.1;XP_021323316.1	ZDB-GENE-050306-18	.	-3.16566	465.007	0.318156	-5.22544	1.73742e-07	2.97394e-06	7.80184	9.4653	8.86615	9.51528	8.84651	8.20755	7.94333	8.37366	481	921	447	338	152	300	10.4719	20.3491	10.5203	4.73135	2.90567	6.34199	34.0502	63.4726	35.253	15.4807	9.1951	20.9262
503742	NM_001013320	tmem182a	transmembrane protein 182a	protein_coding	NP_001013338.1	ZDB-GENE-050306-22	.	-2.53792	164.675	0.372943	-3.60283	0.000314775	0.00214243	6.543	7.88327	7.47501	7.96618	7.03563	6.68707	6.91264	6.98656	194	322	103	103	98	116	4.91474	7.99395	2.74116	1.57147	2.28111	2.53564	15.9806	24.9346	9.1855	5.14175	7.21866	8.36664
503744	NM_001013322	nfybb	nuclear transcription factor Y, beta b	protein_coding	NP_001013340.1	ZDB-GENE-050306-25	.	3.32814	339.431	0.207797	8.34814	6.93469e-17	5.00726e-15	9.02843	7.29162	7.82129	7.6027	7.7984	8.60221	8.81643	8.63835	160	107	147	696	595	516	6.9281	4.52438	6.69498	18.2322	23.6541	19.2152	22.5272	14.1124	22.4346	59.6544	74.8542	63.4029
503746	NM_001013324	nkx3.3	NK3 homeobox 3	protein_coding	NP_001013342.2	ZDB-GENE-050306-27	.	2.53979	27.03	0.436467	3.0809	0.00206376	0.0103757	5.27951	3.92778	4.47426	4.56479	4.44326	4.74721	4.93839	4.97094	13	16	11	43	42	47	0.348673	0.442678	0.314336	0.746482	1.08917	1.15533	1.13373	1.38079	1.05333	2.44244	3.44673	3.81214
503752	NM_001013330	ptrh1	peptidyl-tRNA hydrolase 1 homolog	protein_coding	NP_001013348.1	ZDB-GENE-050306-33	.	2.72463	139.379	0.238245	6.06964	1.28198e-09	3.43622e-08	7.67223	6.22469	6.65164	6.67525	6.61007	7.32541	7.50439	7.2257	69	67	61	288	241	181	2.47322	2.35577	2.32078	6.2659	7.94569	5.59179	8.04184	7.34808	7.77684	20.5016	25.1445	18.4508
503753	NM_001013331,XM_005164512,XM_005164513	zgc:113263	zgc:113263	protein_coding	NP_001013349.2;XP_005164569.1;XP_005164570.1	ZDB-GENE-050306-34	.	3.11911	2675.68	0.160727	10.2107	1.77622e-24	2.61549e-22	11.9845	10.3434	10.7135	10.8355	10.6087	11.6869	11.7221	11.6375	1170	1284	965	6001	4181	4040	10.5302	11.2783	9.23953	32.8948	34.8015	31.5249	34.2399	35.1791	30.9613	107.63	110.131	104.02
503764	NM_001327869	zgc:112964	zgc:112964	protein_coding	NP_001314798.1	ZDB-GENE-050306-47	.	2.32506	80.6715	0.381152	3.19365	0.00140487	0.00753299	6.8158	5.60542	5.64824	6.0832	6.10755	6.72454	6.48359	6.26778	22	51	54	219	108	84	0.50201	1.15509	1.30204	3.06751	2.29823	1.65599	1.63232	3.60294	4.36307	10.0367	7.27285	5.46413
503772	NM_001013350	agtr2	angiotensin II receptor, type 2	protein_coding	NP_001013368.1	ZDB-GENE-050306-56	.	-2.03173	109.626	0.315048	-3.24621	0.00116953	0.00643944	6.17467	7.19981	6.8893	7.22076	6.6332	6.50133	6.49841	6.34222	125	178	83	116	77	63	3.03181	4.23282	2.11908	1.69974	1.7116	1.30768	9.85814	13.203	7.10096	5.56143	5.41642	4.31485
503788	NM_001142566,XM_005161432	slc13a5a	info solute carrier family 13 (sodium-dependent citrate transporter), member 5a	protein_coding	NP_001136038.1;XP_005161489.1	ZDB-GENE-030131-4628	.	-2.68345	76.7942	0.315236	-4.51753	6.25642e-06	7.31009e-05	5.37935	6.80689	6.21726	6.6774	6.41339	5.85285	5.86577	5.76103	73	128	92	65	44	38	1.22445	2.24364	1.71152	0.695935	0.754836	0.545738	3.98138	6.99835	5.73522	2.27705	2.38871	1.80073
503792	NM_001302253	gpc2	glypican 2	protein_coding	NP_001289182.1	ZDB-GENE-050302-31	.	2.11794	664.755	0.215679	5.01978	5.17297e-07	7.9166e-06	9.81837	8.73689	8.87344	8.88899	9.16109	9.75609	9.45124	9.57142	336	321	465	1584	752	915	9.40248	8.77888	13.726	26.7836	19.3063	21.9984	30.5728	27.383	45.9953	87.6341	61.0954	72.5862
504040	NM_001109698	ak7b	adenylate kinase 7b	protein_coding	NP_001103168.2	ZDB-GENE-050309-170	.	2.10397	73.0556	0.280165	3.83029	0.000127992	0.000993948	6.62861	5.55956	5.84915	5.93688	5.91531	6.44769	6.39961	6.23431	39	43	42	163	103	86	0.696137	0.742891	0.794267	1.76623	1.68639	1.32544	2.26354	2.31722	2.66155	5.779	5.33663	4.37344
504088	NM_001199731	enpep	glutamyl aminopeptidase	protein_coding	NP_001186660.1	ZDB-GENE-050309-218	.	-3.07555	223.412	0.22114	-7.32947	2.31058e-13	1.11976e-11	6.77128	8.39913	7.98042	8.04525	8.15974	7.33036	7.21076	7.06822	279	282	327	194	108	91	3.97082	3.92435	4.91555	1.66424	1.404	1.10897	12.9114	12.2408	16.4718	5.44529	4.44302	3.65916
541319	NM_001159819,NM_001166582	crip1	cysteine-rich protein 1	protein_coding	NP_001153291.1;NP_001160054.1	ZDB-GENE-041111-1	.	-3.59921	69.5644	0.287165	-6.43421	1.24118e-10	3.92717e-09	4.92051	6.76612	6.39066	6.38813	6.21266	5.54547	5.59631	5.53925	107	100	80	44	32	30	3.21818	2.93101	2.55217	0.775982	0.862718	0.751526	10.4641	9.14237	8.5522	2.53896	2.73011	2.47975
541344	NM_001013471	prdx1	peroxiredoxin 1	protein_coding	NP_001013489.2	ZDB-GENE-050320-35	.	3.65362	288.565	0.203349	9.19269	3.83149e-20	3.86023e-18	8.8237	6.95448	7.40734	7.56002	7.40931	8.42557	8.57736	8.36777	104	123	99	641	511	427	3.70803	4.28546	3.74508	13.8948	16.8362	13.1791	12.0569	13.3671	12.5496	45.463	53.2789	43.4859
541345	NM_001013472	zgc:110340	zgc:110340	protein_coding	NP_001013490.1	ZDB-GENE-050320-36	.	4.01889	1215.44	0.263846	7.60594	2.82832e-14	1.51797e-12	10.9267	8.91967	9.39489	9.10299	9.62749	10.4889	10.7425	10.4022	440	266	572	2673	2350	1728	19.1766	11.3003	26.3203	70.4388	94.0202	64.7351	62.354	35.2478	88.1981	230.471	297.531	213.601
541395	NM_001013522,XM_005169763	lim2.5	lens intrinsic membrane protein 2.5	protein_coding	NP_001013540.1;XP_005169820.1	ZDB-GENE-050320-94	.	-5.6278	104.07	0.391642	-6.36442	1.96035e-10	5.98818e-09	4.98073	7.46405	6.79448	7.20473	6.7341	5.61927	5.63492	6.07982	136	207	120	31	20	56	5.79728	8.94448	5.46584	0.784514	0.772073	2.00915	18.8503	27.8995	18.3158	2.56688	2.44325	6.62944
541419	NM_001013546,XM_005160685,XM_021468416	cx23	connexin 23	protein_coding	NP_001013564.1;XP_005160742.1;XP_021324091.1	ZDB-GENE-050320-121	.	-8.01319	102.44	0.340289	-8.82301	1.11424e-18	9.69516e-17	4.52969	7.50607	6.97166	7.05167	6.68982	5.40836	5.62259	5.76104	177	182	120	20	23	34	4.47008	4.46377	3.17742	0.285569	0.501455	0.713297	14.5348	13.9233	10.6474	0.934363	1.58687	2.35361
541445	NM_001013570	ogn	osteoglycin	protein_coding	NP_001013588.1	ZDB-GENE-050208-650	.	-3.99161	151.434	0.305027	-6.54686	5.87606e-11	1.97338e-09	5.92531	7.91944	7.45563	7.77666	7.15393	6.46453	6.61572	6.43112	211	287	138	84	72	55	6.11727	8.12912	4.19258	1.45932	1.88827	1.355	19.8908	25.3562	14.0492	4.77482	5.9755	4.47099
541492	NM_001014305,XM_005157144	zgc:110843	zgc:110843	protein_coding	NP_001014327.1;XP_005157201.1	ZDB-GENE-050327-15	.	-2.18275	284.953	0.229276	-4.91176	9.02633e-07	1.30569e-05	7.48882	8.60838	8.41221	8.37446	8.32246	7.52608	7.90605	7.8139	374	335	320	188	216	202	9.31493	8.14817	8.36675	2.92532	5.03418	4.33198	30.2882	25.4157	28.0366	9.57145	15.9308	14.2939
541497	NM_001014310,XM_021468818	slc47a1	solute carrier family 47 (multidrug and toxin extrusion), member 1	protein_coding	NP_001014332.2;XP_021324493.1	ZDB-GENE-050327-20	.	-3.81009	108.27	0.307714	-6.27148	3.57634e-10	1.04386e-08	5.49029	7.42281	6.8127	7.13285	7.01829	6.13896	6.23416	5.87386	124	173	153	73	57	29	2.20597	3.01611	2.88529	0.784814	0.934523	0.433502	7.17286	9.40781	9.66849	2.56786	2.95733	1.43039
541514	NM_001014327,XM_005172669,XM_005172670,XM_017357965	hhla2a.1	HERV-H LTR-associating 2a, tandem duplicate 1	protein_coding	NP_001014349.1;XP_005172726.1;XP_005172727.1;XP_017213454.1	ZDB-GENE-050327-45	.	2.36281	743.83	0.199993	6.20273	5.54906e-10	1.58542e-08	10.0295	8.78967	8.90005	9.25202	9.04728	9.8134	9.8204	9.72179	317	474	369	1588	1074	1018	8.66042	12.4611	10.4595	25.7443	26.3817	23.619	28.16	38.8684	35.0493	84.2338	83.486	77.9338
541520	NM_001014333	cdcp1a	CUB domain containing protein 1a	protein_coding	NP_001014355.1	ZDB-GENE-050327-55	.	3.74869	179.911	0.232754	8.19055	2.60031e-16	1.762e-14	8.15052	6.24164	6.8805	6.70144	6.8131	7.74123	7.8965	7.64474	79	54	67	406	327	258	1.32736	0.882677	1.18813	4.15644	5.08163	3.76127	4.31602	2.75324	3.98138	13.5996	16.081	12.4108
541525	NM_001014338,XM_005170176,XM_009294917	smpdl3a	sphingomyelin phosphodiesterase, acid-like 3A	protein_coding	NP_001014360.1;XP_005170233.1;XP_009293192.1	ZDB-GENE-050327-61	.	2.16022	175.699	0.204875	5.42368	5.83845e-08	1.11114e-06	7.90831	6.79653	7.11903	7.10446	7.06618	7.64035	7.59386	7.7613	105	96	92	342	217	282	2.64878	2.36483	2.44577	5.15978	4.94496	5.98872	8.6127	7.37636	8.19567	16.8825	15.6485	19.7605
541540	NM_001014354,XM_021467646,XM_021467647,XM_021467648,XM_021467649,XM_021467650	kcnab1a	potassium voltage-gated channel, shaker-related subfamily, beta member 1 a	protein_coding	NP_001014376.1;XP_021323321.1;XP_021323322.1;XP_021323323.1;XP_021323324.1;XP_021323325.1	ZDB-GENE-050327-79	.	-2.24197	324.554	0.221098	-5.26809	1.37853e-07	2.41358e-06	7.64445	8.81065	8.48433	8.42142	8.76118	7.987	7.98141	7.80199	372	323	487	321	213	175	6.88632	5.84501	9.71532	3.63593	3.55212	2.83297	22.3914	18.2317	32.5556	11.8965	11.2408	9.34773
541552	NM_001282173,XM_005162314,XM_005162316,XM_005162321,XM_009296986,XM_021469796,XM_021469797,XM_021469798,XM_021469799,XM_021469800,XM_021469801	eya4	EYA transcriptional coactivator and phosphatase 4	protein_coding	NP_001269102.1;XP_005162371.1;XP_005162373.1;XP_005162378.1;XP_009295261.1;XP_021325471.1;XP_021325472.1;XP_021325473.1;XP_021325474.1;XP_021325475.1;XP_021325476.1	ZDB-GENE-050327-93	.	-2.0266	625.662	0.253292	-4.02327	5.73948e-05	0.000501872	8.69079	9.71097	9.26388	9.81794	9.31498	8.98822	8.83148	8.91645	583	1022	589	671	366	434	8.60566	14.968	9.28783	6.12316	5.04653	5.53398	27.9819	46.688	31.1231	20.0346	15.9699	18.26
544656	NM_001014820,XM_005160416	angptl1a	angiopoietin-like 1a	protein_coding	NP_001014820.1;XP_005160473.1	ZDB-GENE-040724-269	.	-2.17349	233.454	0.270353	-4.14278	3.43125e-05	0.000323427	7.20152	8.32066	7.92109	8.37793	7.82952	7.42819	7.54592	7.44129	243	389	206	204	161	147	4.32722	7.33016	4.10085	2.30762	2.70556	2.72125	14.0703	22.8641	13.7418	7.55039	8.56184	8.97908
548337	NM_001017541	hsh2d	hematopoietic SH2 domain containing	protein_coding	NP_001017541.2	ZDB-GENE-050410-3	.	2.41097	74.5013	0.347659	3.6519	0.000260304	0.00181563	6.71919	5.44766	6.08347	5.82049	5.59185	6.46979	6.37994	6.36028	60	35	21	169	101	104	1.20555	0.674262	0.435363	2.04586	1.84926	1.79942	3.91992	2.10315	1.45888	6.69393	5.85204	5.93741
550134	NM_001013272	ubb	ubiquitin B	protein_coding	NP_001013290.2	ZDB-GENE-050411-10	.	4.11244	4636.73	0.152921	13.3402	1.35187e-40	6.08898e-38	12.8649	10.8248	11.2942	11.3827	11.2469	12.4081	12.5973	12.4916	1621	1710	1443	9947	8160	7728	35.4964	36.5832	33.328	131.591	163.887	145.391	115.419	114.11	111.681	430.557	518.628	479.734
550229	NM_001017567	sncga	synuclein, gamma a	protein_coding	NP_001017567.1	ZDB-GENE-050417-18	.	-3.48999	855.761	0.362206	-4.97845	6.40945e-07	9.65968e-06	8.57497	10.3774	9.86213	10.5026	9.34438	8.79247	9.04696	9.0384	1035	1909	539	441	420	440	35.6243	64.2551	19.5576	9.15904	13.2482	12.9904	115.835	200.423	65.5366	29.9678	41.9243	42.8634
550266	NM_001017603,XM_005166840	acer1	alkaline ceramidase 1	protein_coding	NP_001017603.1;XP_005166897.1	ZDB-GENE-050417-70	.	-2.70373	31.5022	0.450008	-3.18872	0.00142902	0.0076446	4.10517	5.5171	4.96901	5.27095	5.02636	4.45992	4.68896	4.75667	33	52	35	14	19	24	0.864605	1.27698	0.94546	0.187695	0.395422	0.485944	2.81133	3.98314	3.1682	0.614125	1.25133	1.60343
550270	NM_001017607	camk4	calcium/calmodulin-dependent protein kinase IV	protein_coding	NP_001017607.1	ZDB-GENE-050417-76	.	-2.30321	305.738	0.21004	-5.73055	1.00103e-08	2.23032e-07	7.53441	8.735	8.62282	8.28563	8.51694	7.75076	7.86761	7.86564	456	287	384	245	193	204	8.52781	5.23633	7.56815	2.76116	3.29842	3.2803	27.7288	16.3331	25.3606	9.03433	10.438	10.8237
550277	NM_001017614,XM_021481406	rhbdd1	rhomboid domain containing 1	protein_coding	NP_001017614.1;XP_021337081.1	ZDB-GENE-050417-85	.	5.05167	205.93	0.249654	9.36001	7.97325e-21	8.40154e-19	8.42555	6.08807	6.77766	6.87978	6.701	7.9102	8.17386	7.81117	61	68	50	469	424	298	1.61139	1.7827	1.47981	7.65932	10.5235	6.93648	5.23954	5.56057	4.95877	25.0608	33.3019	22.8877
550346	NM_001017653	cyr61l1	cysteine-rich, angiogenic inducer 61 like 1	protein_coding	NP_001017653.1	ZDB-GENE-050417-136	.	2.10033	97.1723	0.382908	2.79601	0.00517381	0.0220456	7.04162	5.96805	6.35118	6.47639	5.87067	6.53979	6.79891	6.92444	66	75	24	142	136	169	1.55563	1.74146	0.581199	2.0363	2.96027	3.44741	5.05824	5.43195	1.94757	6.66266	9.36788	11.3751
550353	NM_001017660	histh1l	histone H1 like	protein_coding	NP_001017660.1	ZDB-GENE-050417-145	.	2.6861	9594.65	0.237177	6.01034	1.85139e-09	4.78384e-08	13.7715	12.3458	12.7865	12.438	12.711	13.2186	13.7098	13.5135	5600	3329	4844	15095	17318	14868	179.524	104.302	163.821	292.34	509.206	409.51	583.734	325.338	548.957	956.519	1611.4	1351.23
550357	NM_001017664,XM_021470164,XM_021470165,XM_021470166	cremb	cAMP responsive element modulator b	protein_coding	NP_001017664.1;XP_021325839.1;XP_021325840.1;XP_021325841.1	ZDB-GENE-050417-150	.	2.16753	54.2638	0.355179	3.14223	0.00167667	0.00874343	6.21723	5.09288	5.5117	5.51573	5.37713	5.71663	6.13054	5.85453	34	32	24	80	100	71	0.709279	0.669482	0.53446	1.49893	2.92569	1.70728	2.30627	2.08824	1.79095	4.90439	9.25847	5.63339
550359	NM_001017666	morn3	MORN repeat containing 3	protein_coding	NP_001017666.1	ZDB-GENE-050417-152	.	4.10559	40.5992	0.414741	4.91292	8.97301e-07	1.2988e-05	6.02998	3.98683	4.95582	4.9005	4.65136	5.48007	5.52555	5.59504	20	16	6	88	64	75	0.771041	0.632101	0.236871	2.14864	2.37258	2.58376	2.5071	1.97164	0.793746	7.03022	7.50812	8.52542
550361	XM_005164059,XM_009299563,XM_021474192,XM_021474195,XM_021474199	cpt1cb	carnitine palmitoyltransferase 1Cb, transcript variant X5	protein_coding	XP_005164116.1;XP_009297838.1;XP_021329867.1;XP_021329870.1;XP_021329874.1	ZDB-GENE-050417-155	.	2.39553	178.615	0.213578	5.9011	3.61082e-09	8.85211e-08	7.97634	6.71965	6.98405	7.10518	7.09455	7.8063	7.60611	7.70171	85	96	96	417	220	262	1.31573	1.45531	1.50549	4.53538	3.12359	3.82658	4.27821	4.53938	5.04485	14.8395	9.88472	12.6263
550367	NM_001159820	triap1	TP53 regulated inhibitor of apoptosis 1	protein_coding	NP_001153292.2	ZDB-GENE-050417-161	.	-2.65607	65.8618	0.301653	-4.6719	2.9842e-06	3.79148e-05	5.18028	6.57689	6.31213	6.23815	6.11844	5.53951	5.76001	5.60245	98	83	71	44	45	35	3.96825	3.30583	3.05727	1.069	1.66266	1.22712	12.9031	10.3115	10.2448	3.49771	5.26155	4.04903
550371	NM_001017676,XM_009298923	capsla	calcyphosine-like a	protein_coding	NP_001017676.1;XP_009297198.1	ZDB-GENE-030131-7291	.	2.13533	27.8244	0.44973	2.43359	0.01495	0.0508014	5.24191	4.15439	4.61967	4.58039	4.55221	5.02058	4.66475	5.0187	18	15	14	67	22	48	0.79791	0.668375	0.632621	1.83559	0.989956	1.86784	2.59446	2.08479	2.11989	6.00594	3.13275	6.16315
550375	NM_001017680	fbxo16	F-box protein 16	protein_coding	NP_001017680.1	ZDB-GENE-041015-747	.	5.50413	80.1008	0.328247	7.49592	6.58339e-14	3.40602e-12	7.08375	4.61773	5.6311	5.48596	5.49835	6.51562	6.75994	6.39665	28	18	19	186	170	114	0.722982	0.446019	0.516581	2.90059	4.02707	2.5333	2.35083	1.39122	1.73104	9.49056	12.7438	8.35893
550406	NM_001017711,XM_021476153	grk1b	G protein-coupled receptor kinase 1 b	protein_coding	NP_001017711.2;XP_021331828.1	ZDB-GENE-050417-211	.	-7.64287	1997.22	0.258916	-11.3323	9.07992e-30	1.96769e-27	8.85263	11.7863	11.3898	10.8073	11.5194	9.5706	9.67662	9.53923	3608	1822	3913	656	514	442	65.2274	31.9124	75.2103	7.13306	8.58227	6.91462	212.092	99.5408	252.026	23.3389	27.1589	22.8156
550409	XM_005164952,XM_017355857	ms4a17a.7	membrane-spanning 4-domains, subfamily A, member 17A.7, transcript variant X2	protein_coding	XP_005165009.1;XP_017211346.1	ZDB-GENE-080829-2	.	2.60173	150.952	0.315352	4.37439	1.21775e-05	0.000131082	7.76933	6.38768	6.87724	6.91464	6.44241	7.3437	7.64727	7.35983	91	90	40	278	270	202	1.51727	1.40391	0.662847	2.70383	3.96657	2.80972	4.9335	4.37905	2.22117	8.84675	12.5524	9.27102
550419	NM_001017724	zgc:112160	zgc:112160	protein_coding	NP_001017724.1	ZDB-GENE-050417-229	.	-5.90378	80.5856	0.36545	-7.00955	2.39082e-12	1.0077e-10	4.5526	7.10542	6.83106	6.15808	6.55166	5.39452	5.48702	5.50855	176	70	120	30	24	27	4.8571	1.88254	3.5018	0.497882	0.60386	0.630483	15.7932	5.872	11.7344	1.62904	1.91094	2.08035
550420	NM_001309529	gucy1a3	guanylate cyclase 1, soluble, alpha 3	protein_coding	NP_001296458.1	ZDB-GENE-050417-230	.	-2.03423	430.11	0.161946	-6.32607	2.51478e-10	7.56113e-09	8.14664	9.17201	8.95778	8.89699	9.03079	8.40896	8.34718	8.41352	523	456	541	429	264	306	8.2849	7.06471	9.05124	4.11044	3.84072	4.16475	26.9389	22.0362	30.3303	13.4491	12.1541	13.7421
550433	NM_001017738	cryba1l1	crystallin, beta A1, like 1	protein_coding	NP_001017738.1	ZDB-GENE-050417-249	.	-9.95112	8912.36	0.282311	-11.7419	7.77548e-32	1.94142e-29	10.6686	13.9834	13.2323	13.8208	13.0901	11.4612	11.3736	11.6786	12080	20454	9896	2213	1284	2182	596.124	986.511	515.146	65.9558	58.1062	92.4986	1938.34	3077.11	1726.23	215.803	183.879	305.21
550442	NM_001017747	coq10b	coenzyme Q10B	protein_coding	NP_001017747.1	ZDB-GENE-050417-263	.	-2.39903	269.324	0.30896	-4.08613	4.38629e-05	0.000399198	7.30745	8.57079	8.13599	8.67876	7.89737	7.63375	7.61216	7.5672	289	503	204	244	158	157	13.8059	23.4919	10.274	7.03343	6.90592	6.42414	44.8908	73.2755	34.4278	23.0129	21.854	21.1972
550443	NM_001017748,XM_005159012,XM_017351921	tmem243a	transmembrane protein 243, mitochondrial a	protein_coding	NP_001017748.1;XP_005159069.1;XP_017207410.1	ZDB-GENE-050417-264	.	-3.13368	53.1924	0.43731	-3.76817	0.000164448	0.00122967	4.70525	6.32729	5.9531	5.77439	5.96023	4.91853	5.3952	5.394	79	57	76	14	34	36	1.5405	1.09638	1.39552	0.141322	0.568602	0.556341	5.00905	3.41981	4.67634	0.462397	1.79936	1.83571
550445	NM_001017750	acta1a	actin, alpha 1a, skeletal muscle	protein_coding	NP_001017750.1	ZDB-GENE-050417-267	.	2.41087	1983.13	0.310466	4.08918	4.32897e-05	0.000394293	11.4529	10.1835	10.3518	10.8253	9.99631	11.2123	11.1636	11.2091	935	1574	539	4211	2677	2981	25.9145	42.6445	15.7642	70.5481	68.0771	71.0181	84.2629	133.016	52.8252	230.829	215.433	234.333
550446	NM_001159821	ss18l2	synovial sarcoma translocation gene on chromosome 18-like 2	protein_coding	NP_001153293.1	ZDB-GENE-050417-268	.	-3.18511	30.446	0.406727	-4.10925	3.9695e-05	0.000366937	3.87826	5.52941	5.14623	5.03023	5.02171	4.47435	4.65261	4.53071	48	37	37	17	19	14	2.21266	1.64521	1.76081	0.469257	0.789353	0.550807	7.19462	5.13173	5.90042	1.53538	2.49794	1.81745
550456	NM_001017760,XM_021469325	lrrc39	leucine rich repeat containing 39	protein_coding	NP_001017760.1;XP_021325000.1	ZDB-GENE-050417-279	.	-3.1005	566.032	0.295204	-5.53008	3.20083e-08	6.39359e-07	8.10871	9.74151	9.32032	9.76063	9.02443	8.46966	8.31383	8.65031	705	1065	476	398	212	360	12.517	18.3372	10.1769	5.27543	4.28988	4.69976	40.6999	57.197	34.1023	17.2609	13.5755	15.5074
550476	NM_001017779,NM_001291346,XM_005163261	zgc:110366	zgc:110366	protein_coding	NP_001017779.2;NP_001278275.1;XP_005163318.1	ZDB-GENE-050417-302	.	-2.62972	55.0222	0.358653	-3.8893	0.000100533	0.000812287	4.92621	6.31542	6.00694	6.01559	5.80947	5.30224	5.25159	5.59419	79	75	56	37	21	47	2.18388	2.00967	1.63273	0.613716	0.53254	1.10646	7.10103	6.26854	5.4712	2.00804	1.68524	3.65089
550497	NM_001017799	zgc:110333	zgc:110333	protein_coding	NP_001017799.1	ZDB-GENE-050417-331	.	2.20475	76.1213	0.376399	3.03033	0.00244284	0.011924	6.70815	5.57548	5.74371	5.91704	6.05341	6.70668	6.35755	6.08049	31	41	53	225	96	67	0.760371	0.977909	1.37416	3.39054	2.1797	1.41992	2.4724	3.05028	4.60474	11.0936	6.89776	4.68518
550501	NM_001017803	zgc:111983	zgc:111983	protein_coding	NP_001017803.1	ZDB-GENE-050417-335	.	6.10701	28.4774	0.525006	4.97226	6.61773e-07	9.9275e-06	5.61273	3.00395	4.20341	4.30684	4.30232	4.94844	5.22669	4.72163	5	8	8	67	70	32	0.092694	0.170302	0.179589	0.902979	1.42968	0.602407	0.301402	0.531204	0.601794	2.95449	4.52426	1.98771
550502	NM_001017804	adss	adenylosuccinate synthase	protein_coding	NP_001017804.1	ZDB-GENE-050417-337	.	-2.26592	559.466	0.216274	-5.45648	4.85671e-08	9.37508e-07	8.42022	9.6006	9.23122	9.61077	9.18888	8.69561	8.70687	8.67431	610	875	552	508	345	350	12.6066	17.6711	12.026	6.34005	6.53979	6.21528	40.9913	55.1193	40.2987	20.7442	20.6954	20.5081
550523	NM_001017825	stoml3b	stomatin (EPB72)-like 3b	protein_coding	NP_001017825.1	ZDB-GENE-050417-366	.	-2.3799	39.2446	0.382332	-3.27176	0.00106882	0.00596206	4.53573	5.78906	5.44889	5.19456	5.60474	5.00302	4.97365	4.98375	52	31	63	36	22	24	1.91251	1.09939	2.42052	0.80088	0.716012	0.748846	6.21867	3.4292	8.11105	2.62043	2.26585	2.47091
550539	NM_001017841,XM_005158600	slc18b1	solute carrier family 18, subfamily B, member 1	protein_coding	NP_001017841.1;XP_005158657.1	ZDB-GENE-050417-386	.	-2.06495	86.1759	0.249948	-4.18531	2.8478e-05	0.000274745	5.81031	6.86092	6.58857	6.65059	6.56662	6.17226	6.14347	6.05908	104	106	96	90	57	52	1.77822	2.0623	1.91176	0.901208	1.15163	0.803282	5.782	6.43269	6.40623	2.94869	3.64437	2.65052
550549	NM_001017851,XM_005156639,XM_021480575	eif4e1c	eukaryotic translation initiation factor 4E family member 1c	protein_coding	NP_001017851.2;XP_005156696.1;XP_021336250.1	ZDB-GENE-050417-398	.	-2.39852	370.487	0.182196	-6.92741	4.2861e-12	1.73644e-10	7.76962	9.03	8.73553	8.89952	8.67496	8.02658	8.11922	8.08664	456	515	404	300	228	231	11.2864	12.4433	10.6434	4.51947	5.22807	4.94986	36.6985	38.8129	35.6657	14.7874	16.5444	16.3327
550551	NM_001017853,XM_005171579	cbx7a	chromobox homolog 7a	protein_coding	NP_001017853.1;XP_005171636.1	ZDB-GENE-050417-400	.	9.10803	1840.4	0.224289	14.21	7.94433e-46	5.52998e-43	11.6955	8.5085	9.27622	9.51642	9.25164	10.944	11.3475	11.1632	292	398	266	3887	3954	3471	6.33446	8.53374	6.26606	51.6412	79.5503	65.4218	20.5969	26.6183	20.9973	168.967	251.74	215.867
550561	NM_001017863	ppp1r14aa	protein phosphatase 1, regulatory (inhibitor) subunit 14Aa	protein_coding	NP_001017863.1	ZDB-GENE-050417-413	.	-2.49662	42.1936	0.37746	-3.497	0.000470529	0.0030192	4.61057	5.90587	5.55852	5.55221	5.51817	4.86701	5.18685	5.12892	56	52	50	21	31	29	2.62667	2.35444	2.453	0.580513	1.30368	1.15524	8.54081	7.34395	8.2199	1.8994	4.12554	3.81184
550562	NM_001017864,XM_017357328	spinb	spindlin b	protein_coding	NP_001017864.1;XP_017212817.1	ZDB-GENE-050417-414	.	2.35157	54.819	0.333291	3.70133	0.000214469	0.00153428	6.26612	5.03005	5.44376	5.49213	5.43579	5.91035	6.12317	5.77624	29	30	27	107	98	62	0.981669	1.01235	0.962834	2.22589	3.08233	1.84091	3.19197	3.15772	3.22642	7.28298	9.75415	6.07431
550568	NM_001017870	pdlim1	PDZ and LIM domain 1 (elfin)	protein_coding	NP_001017870.1	ZDB-GENE-030131-5227	.	2.5179	424.768	0.189008	7.04851	1.80842e-12	7.73577e-11	9.24841	7.91487	8.21786	8.32531	8.17716	8.83858	9.07363	9.02404	213	231	191	758	666	667	6.21254	6.60159	5.89949	13.3935	17.8756	16.7664	20.2005	20.5916	19.769	43.8226	56.568	55.3229
550580	NM_001017881,XM_005163161,XM_021470490	sqrdl	sulfide quinone reductase-like (yeast)	protein_coding	NP_001017881.1;XP_005163218.1;XP_021326165.1	ZDB-GENE-050417-436	.	2.48698	169.932	0.258264	5.08936	3.59278e-07	5.73521e-06	7.92019	6.60943	6.80961	7.07193	6.99769	7.77514	7.67947	7.41941	69	98	89	421	253	194	1.68821	2.30657	2.41222	6.51549	5.88377	4.35362	5.48934	7.19463	8.08326	21.3183	18.6194	14.3653
550584	NM_001017885,XM_021467652	chrna5	cholinergic receptor, nicotinic, alpha 5	protein_coding	NP_001017885.1;XP_021323327.1	ZDB-GENE-050417-440	.	2.58644	446.437	0.174807	7.84275	4.40782e-15	2.65057e-13	9.33027	7.96094	8.27079	8.29216	8.33007	9.17694	9.02769	8.96774	219	211	226	1080	613	606	4.80979	5.18388	5.33183	16.4713	14.0702	13.198	15.6394	16.1695	17.8667	53.8932	44.5256	43.5484
550596	NM_001017897	pbld2	phenazine biosynthesis-like protein domain containing 2	protein_coding	NP_001017897.1	ZDB-GENE-050417-456	.	-2.83384	111.808	0.383554	-3.91798	8.92928e-05	0.000737822	5.86996	7.36747	6.9186	7.3792	6.52506	6.1402	6.43943	6.22999	136	222	75	68	75	56	5.56809	8.9024	3.21473	1.67054	2.79908	1.9763	18.105	27.7683	10.7724	5.46591	8.85779	6.52105
550602	NM_001017903,NM_001348483,XM_005164743,XM_009300279,XM_021475014	epyc	epiphycan	protein_coding	NP_001017903.3;NP_001335412.1;XP_005164800.1;XP_009298554.1;XP_021330689.1	ZDB-GENE-041008-9	.	-2.17324	3866.06	0.285104	-3.92785	8.5708e-05	0.000711786	11.2505	12.3706	11.8814	12.5412	11.8451	11.6271	11.3596	11.4252	3611	6949	3292	4322	2073	2389	60.013	105.151	57.246	41.8758	28.2965	33.7537	195.137	327.986	191.829	137.015	89.5453	111.374
550609	NM_001017910,XM_005158424	rpz4	rapunzel 4	protein_coding	NP_001017910.1;XP_005158481.1	ZDB-GENE-050417-472	.	2.07185	179.371	0.26687	3.93794	8.21848e-05	0.000686497	7.919	6.86688	7.14171	7.32971	6.9005	7.56035	7.67452	7.80002	107	131	69	306	237	292	2.70621	3.23934	1.80885	4.69125	5.52288	6.17791	8.79944	10.1041	6.06137	15.3495	17.4774	20.3847
552924	NM_001020494	slc2a15b	solute carrier family 2 (facilitated glucose transporter), member 15b	protein_coding	NP_001018330.1	ZDB-GENE-050508-1	.	-2.04393	177.864	0.27404	-3.76348	0.000167566	0.00124936	6.87187	7.89849	7.6094	7.86432	7.47266	6.94207	7.10893	7.30391	204	260	163	130	112	157	4.73772	5.92167	3.99299	1.82959	2.37822	3.12858	15.405	18.4708	13.3803	5.98632	7.52597	10.3231
552960	NM_001020500	cybrd1	cytochrome b reductase 1	protein_coding	NP_001018336.1	ZDB-GENE-050522-365	.	2.11742	139.23	0.26233	4.12575	3.69536e-05	0.000345768	7.56228	6.48309	6.54678	6.94408	6.80663	7.34715	7.2769	7.32396	55	98	81	289	178	200	2.6537	4.63847	4.16762	8.50267	7.95364	8.3801	8.62869	14.4683	13.9655	27.8202	25.1696	27.6511
553169	NM_001020513	gstp2	glutathione S-transferase pi 2	protein_coding	NP_001018349.1	ZDB-GENE-050601-1	.	12.7915	102.266	0.37181	9.88978	4.61045e-23	6.01743e-21	7.56736	3.89348	5.31707	5.31614	5.60681	6.96623	7.04154	6.73001	9	8	22	293	216	159	0.498714	0.449837	1.42829	10.8764	12.1643	8.40931	1.6216	1.40312	4.78615	35.587	38.4945	27.7475
553178	NM_001018125,XM_009305688	cryba4	crystallin, beta A4	protein_coding	NP_001018135.1;XP_009303963.1	ZDB-GENE-050522-143	.	-9.52137	9650.55	0.290636	-11.1864	4.75453e-29	9.92875e-27	10.8411	14.0923	13.3067	13.9468	13.2323	11.6495	11.4743	11.8295	12471	22288	10966	2654	1338	2461	758.43	1319.79	714.062	98.9609	74.6263	130.333	2466.09	4116.69	2392.79	323.794	236.158	430.05
553181	NM_001018127	kitlgb	kit ligand b	protein_coding	NP_001018137.1	ZDB-GENE-070424-2	.	2.30176	39.737	0.41108	2.9258	0.00343567	0.0157968	5.78909	4.59564	4.80758	5.20211	5.05456	5.55124	5.4005	5.4128	11	30	22	94	50	54	0.555101	1.56985	1.26269	3.09848	2.4724	2.50221	1.80495	4.89665	4.23123	10.138	7.824	8.25633
553212	XM_678306	st8sia6	ST8 alpha-N-acetyl-neuraminide alpha-2,8-sialyltransferase 6	protein_coding	XP_683398.2	ZDB-GENE-060322-9	.	-2.7173	787.943	0.273987	-5.26366	1.41214e-07	2.46491e-06	8.72907	10.1694	9.90207	10.1271	9.52865	8.80799	9.19995	9.11022	1076	1286	668	445	508	479	9.21775	10.7723	6.03943	2.3044	3.99066	3.52621	29.9722	33.6008	20.2379	7.53984	12.6286	11.6352
553216	NM_001037371	pm20d1.1	peptidase M20 domain containing 1, tandem duplicate 1	protein_coding	NP_001032448.1	ZDB-GENE-051120-102	.	-2.95041	63.2016	0.320238	-4.87423	1.09233e-06	1.55724e-05	5.00622	6.55865	6.2361	6.00172	6.25639	5.47737	5.66003	5.43576	94	63	92	43	41	27	2.50582	1.63324	2.60157	0.693202	1.00198	0.610492	8.14785	5.09439	8.71774	2.26811	3.17081	2.01439
553218	NM_001025472,XM_005157631,XM_005157632,XM_005157633	lsr	lipolysis stimulated lipoprotein receptor	protein_coding	NP_001020643.1;XP_005157688.1;XP_005157689.1;XP_005157690.1	ZDB-GENE-050913-73	.	2.11693	216.902	0.229776	4.7088	2.49181e-06	3.22658e-05	8.20238	7.12155	7.31913	7.44952	7.4219	8.02747	8.09874	7.74872	113	128	125	465	340	235	1.82788	2.11538	2.12248	4.76216	5.25894	3.41499	5.94348	6.59827	7.11233	15.5815	16.6421	11.2682
553232	NM_001044319	znf296	zinc finger protein 296	protein_coding	NP_001037784.1	ZDB-GENE-050419-201	.	2.10029	240.233	0.291328	3.67487	0.000237974	0.00168459	8.34677	7.27527	7.63249	7.18447	7.71409	8.12455	8.23895	7.94405	162	76	172	488	375	279	1.98763	0.910947	2.22728	3.62206	4.22402	2.94101	6.46293	2.84141	7.46351	11.8511	13.3671	9.70422
553243	NM_001202527,XM_005158673	add3b	adducin 3 (gamma) b	protein_coding	NP_001189456.1;XP_005158730.1	ZDB-GENE-080718-6	.	-2.19202	180.754	0.201363	-5.623	1.87673e-08	3.9587e-07	6.82039	7.95705	7.72061	7.65225	7.75099	7.17904	7.03771	7.14237	230	198	227	182	98	122	4.01856	3.38306	4.20001	1.8756	1.52522	1.85132	13.0667	10.5524	14.0741	6.13686	4.82663	6.10866
553256	NM_001098178	slc6a19a.1	solute carrier family 6 (neutral amino acid transporter), member 19a, tandem duplicate 1	protein_coding	NP_001091648.1	ZDB-GENE-070620-2	.	-6.78252	92.3825	0.356351	-7.75029	9.16833e-15	5.18733e-13	4.571	7.33088	6.77639	6.43985	6.98821	5.50921	5.43617	5.71503	150	92	183	32	16	35	1.68428	1.01064	2.17288	0.215227	0.161149	0.335257	5.47657	3.15238	7.28124	0.704208	0.509962	1.10622
553293	NM_001079956,XM_017351348,XM_021466689	pbxip1b	pre-B-cell leukemia homeobox interacting protein 1b	protein_coding	NP_001073425.2;XP_017206837.1;XP_021322364.1	ZDB-GENE-070112-2032	.	-2.22112	769.495	0.236065	-4.87699	1.07715e-06	1.53684e-05	8.90165	10.0508	9.78025	10.0049	9.63739	8.91604	9.28051	9.23937	927	1114	748	508	553	556	7.36832	8.71673	6.32602	2.53133	4.03705	3.84286	23.9586	27.1891	21.1982	8.28237	12.7754	12.68
553326	NM_001327864,XM_005166551,XR_223879	hacd1	3-hydroxyacyl-CoA dehydratase 1	protein_coding	NP_001314793.1;XP_005166608.1	ZDB-GENE-170413-2	.	-3.71036	188.139	0.382196	-4.94919	7.45227e-07	1.10158e-05	6.32433	8.21016	7.73382	8.19154	7.2497	6.5989	7.03137	6.76658	252	394	131	82	110	77	4.61169	7.12375	2.53323	0.909603	1.84462	1.23859	14.9952	22.2203	8.48874	2.97616	5.83737	4.08688
553328	NM_001037101	hells	helicase, lymphoid-specific	protein_coding	NP_001032178.1	ZDB-GENE-030131-9923	.	-2.61133	268.943	0.215734	-6.41895	1.37215e-10	4.31775e-09	7.21758	8.60381	8.30721	8.42392	8.20814	7.57619	7.42155	7.69569	351	376	297	222	117	186	4.86984	5.09777	4.33808	1.85369	1.48556	2.20663	15.8346	15.9009	14.5367	6.06514	4.7011	7.28103
553352	XM_021470359	aglb	amylo-alpha-1, 6-glucosidase, 4-alpha-glucanotransferase b	protein_coding	XP_021326034.1	ZDB-GENE-050309-54	.	-4.88902	1408.88	0.323768	-7.07156	1.53203e-12	6.62756e-11	8.90285	11.1917	10.579	11.213	10.2419	9.30336	9.45691	9.55478	1758	3219	1147	572	482	587	16.9726	30.3727	11.6776	3.33438	4.26205	4.86144	55.1877	94.738	39.1312	10.9099	13.4874	16.0409
553353	XM_017351848	si:ch211-202f3.3	si:ch211-202f3.3	protein_coding	XP_017207337.2	ZDB-GENE-080917-19	.	3.18109	213.269	0.36145	4.61896	3.85676e-06	4.75033e-05	8.34169	6.67418	6.73842	7.01651	7.44295	8.14086	8.05581	7.7061	48	75	144	571	349	244	0.78989	1.19511	2.48808	5.66775	5.25673	3.43783	2.56838	3.72778	8.33745	18.5445	16.6351	11.3435
553375	NM_001128232,XM_009301181,XM_009301182,XM_009301183,XM_009301184,XM_009301185	spef2	sperm flagellar 2	protein_coding	NP_001121704.1;XP_009299456.1;XP_009299457.1;XP_009299458.1;XP_009299459.1;XP_009299460.1	ZDB-GENE-060526-47	.	5.59507	401.811	0.223588	11.1104	1.11638e-28	2.22994e-26	9.4127	6.93144	7.4738	7.73879	7.62528	9.11817	8.82099	8.92467	87	126	107	1187	578	686	0.651835	0.935521	0.854453	5.44286	4.03516	4.48206	2.11949	2.91807	2.86323	17.8087	12.7694	14.7891
553377	NM_001328330,XM_005160688	prg4b	proteoglycan 4b	protein_coding	NP_001315259.1;XP_005160745.1	ZDB-GENE-041014-324	.	2.18383	38.0411	0.363872	3.09686	0.00195579	0.00992278	5.7061	4.57759	5.02872	4.96374	5.03219	5.40205	5.4879	5.26814	23	18	22	78	61	44	0.338341	0.257233	0.346403	0.709328	0.827853	0.557173	1.10014	0.802356	1.16078	2.32088	2.61977	1.83846
553386	XM_005167397	LOC553386	uncharacterized LOC553386	protein_coding	XP_005167454.1	.	.	-2.72198	18.5861	0.492505	-2.93328	0.00335399	0.0154757	3.30392	4.77063	4.35466	4.32876	4.26285	4.0333	3.95021	3.91124	27	24	21	19	9	8	1.13447	1.00093	0.925458	0.487655	0.353644	0.288471	3.68882	3.12209	3.10117	1.59558	1.11912	0.951846
553420	NM_001020520	mipb	major intrinsic protein of lens fiber b	protein_coding	NP_001018356.1	ZDB-GENE-050706-86	.	-7.95365	1483.97	0.245811	-12.1704	4.46923e-34	1.22218e-31	8.37296	11.3644	10.8169	11.0913	10.5924	9.10168	8.99883	9.32335	2318	2874	1739	454	255	449	47.8201	57.9654	37.8466	5.65803	4.80939	7.95627	155.49	180.805	126.822	18.5127	15.2195	26.2527
553432	NM_001042753	lrit1b	leucine-rich repeat, immunoglobulin-like and transmembrane domains 1b	protein_coding	NP_001036218.1	ZDB-GENE-060616-45	.	-3.09134	674.202	0.220432	-7.38656	1.50682e-13	7.45971e-12	8.36561	9.99232	9.83873	9.38341	9.75775	8.6683	8.76913	8.81559	1108	623	965	433	333	376	19.2097	10.5558	17.647	4.53141	5.28409	5.58619	62.4618	32.9256	59.1345	14.8265	16.7217	18.4323
553433	NM_001079702,XM_017356086,XM_017356088,XM_021476154,XM_021476155	pisd	phosphatidylserine decarboxylase	protein_coding	NP_001073170.1;XP_017211575.1;XP_017211577.1;XP_021331829.1;XP_021331830.1	ZDB-GENE-061215-46	.	-2.42932	817.613	0.162923	-7.85986	3.84563e-15	2.31858e-13	8.89778	10.1777	10.0372	9.79963	9.93834	9.17452	9.1981	9.21276	1191	854	1015	685	473	511	19.5105	14.7428	18.5894	6.79755	6.92112	7.36841	63.4398	45.9856	62.2923	22.2411	21.9021	24.3129
553441	NM_001327746,XM_009303339	tex9	testis expressed 9	protein_coding	NP_001314675.1;XP_009301614.1	ZDB-GENE-110623-3	.	3.39132	82.946	0.339266	5.19312	2.06801e-07	3.50068e-06	7.00165	5.23821	5.91306	5.57247	5.95409	6.67086	6.67533	6.43556	41	17	42	206	140	108	1.08709	0.44531	1.1829	3.38768	3.50897	2.51245	3.53476	1.38901	3.96386	11.0843	11.1043	8.29011
553443	NM_001083819,XM_021480577,XM_021480578	vstm4a	V-set and transmembrane domain containing 4a	protein_coding	NP_001077288.1;XP_021336252.1;XP_021336253.1	ZDB-GENE-060810-69	.	-2.00812	95.0086	0.297827	-3.37728	0.000732076	0.00435548	5.98444	6.98532	6.70226	6.94702	6.49789	6.17839	6.3698	6.23649	111	143	79	81	74	63	3.35408	4.21643	2.49735	1.44992	2.0433	1.56025	10.906	13.1518	8.36852	4.74404	6.4661	5.14823
553464	NM_001045267	hdhd3	haloacid dehalogenase-like hydrolase domain containing 3	protein_coding	NP_001038732.2	ZDB-GENE-040724-118	.	-2.00251	59.237	0.363079	-2.75919	0.00579441	0.0241899	5.31337	6.29849	6.11476	5.92626	6.02001	5.34703	5.65292	5.7912	82	58	68	33	42	57	2.83158	1.96042	2.46834	0.679067	1.33092	1.68045	9.20709	6.11491	8.27129	2.22187	4.21176	5.54485
553473	XM_005169625	crybb1l1	crystallin, beta B1, like 1	protein_coding	XP_005169682.1	ZDB-GENE-100112-3	.	-10.0852	17997.9	0.277411	-12.0189	2.82727e-33	7.55177e-31	11.665	14.9991	14.2321	14.8198	14.153	12.4841	12.3488	12.6819	24044	40690	21047	4564	2452	4363	946.675	1565.82	874.224	108.538	88.5164	147.551	3078.18	4884.07	2929.49	355.131	280.114	486.861
553474	NM_001033722	crybgx	crystallin beta gamma X	protein_coding	NP_001028894.1	ZDB-GENE-070410-2	.	-52.3513	1746.69	0.293615	-19.4478	3.04337e-84	9.98702e-81	6.04176	11.7429	10.7768	11.3271	10.6093	7.86546	8.00915	8.08502	2645	4211	2129	69	67	87	159.027	247.443	135.053	2.47384	3.65373	4.4588	517.089	771.821	452.558	8.09426	11.5624	14.7124
553479	XM_687026	si:ch211-133j6.3	si:ch211-133j6.3	protein_coding	XP_692118.7	ZDB-GENE-090312-205	.	-2.63381	21.6497	0.481372	-2.90244	0.00370265	0.0167825	3.55944	4.97773	4.5109	4.4466	4.65265	4.23496	4.05793	4.20592	27	22	34	22	7	14	0.553607	0.445733	0.744758	0.278643	0.126358	0.242632	1.80009	1.39033	2.49565	0.911703	0.399866	0.800592
553492	XM_009301727,XM_021476611,XM_021476612	LOC553492	transcription factor TFIIIB component B'' homolog, transcript variant X1	protein_coding	XP_009300002.1;XP_021332286.1;XP_021332287.1	.	.	2.16087	457.068	0.214316	5.1868	2.13933e-07	3.60699e-06	9.28709	8.17695	8.30344	8.63847	8.33964	9.14788	9.0253	9.00437	219	321	219	1016	593	613	1.26975	1.82119	1.33752	3.56575	3.15478	3.05566	4.12869	5.68063	4.48198	11.6669	9.98342	10.0825
553512	NM_001077248,XM_005160200	slc27a1b	solute carrier family 27 (fatty acid transporter), member 1b	protein_coding	NP_001070716.1;XP_005160257.1	ZDB-GENE-061013-672	.	2.03682	225.35	0.269759	3.80456	0.000142055	0.0010841	8.23958	7.21386	7.17401	7.66671	7.50044	7.94483	8.13093	7.95143	86	167	135	410	344	294	1.50524	2.88966	2.50285	4.38639	5.58944	4.44034	4.89439	9.01341	8.38696	14.352	17.688	14.6514
553515	XM_001337411	si:ch211-95j8.2	si:ch211-95j8.2	protein_coding	XP_001337447.2	ZDB-GENE-091204-28	.	4.34879	84.8767	0.4418	4.79994	1.58711e-06	2.17917e-05	7.10941	4.985	5.78766	5.37313	5.87098	6.5471	6.94123	6.28617	35	10	39	183	200	92	0.772587	0.206129	0.902223	2.44767	4.0533	1.74442	2.51212	0.642956	3.02331	8.00864	12.8268	5.75592
553517	NM_001327797	si:ch73-252i11.1	si:ch73-252i11.1	protein_coding	NP_001314726.1	ZDB-GENE-141210-7	.	2.26975	58.6616	0.352899	3.35092	0.000805438	0.00472224	6.34674	5.16734	5.35081	5.59631	5.70118	6.06553	6.15443	5.87992	20	33	41	124	95	67	0.233992	0.382544	0.510026	0.889505	1.03247	0.684073	0.760843	1.19323	1.70908	2.9104	3.26728	2.25718
553530	NM_001030281	mep1a.1	meprin A, alpha (PABA peptide hydrolase), tandem duplicate 1	protein_coding	NP_001025452.1	ZDB-GENE-041001-209	.	-3.80723	41.2213	0.560391	-3.44178	0.000577904	0.00358107	4.08014	6.03406	5.47613	5.07215	5.80971	5.04008	4.77355	4.54553	58	27	88	44	15	6	1.28664	0.574193	2.03808	0.583788	0.288048	0.097996	4.18361	1.79102	6.82951	1.91012	0.91154	0.323349
553537	XM_017353668	cyp2aa11	cytochrome P450, family 2, subfamily AA, polypeptide 11	protein_coding	XP_017209157.1	ZDB-GENE-110114-3	.	2.95688	860.434	0.212875	7.3474	2.02106e-13	9.83597e-12	10.3285	8.76488	9.08553	9.0981	9.21097	10.1435	10.15	9.74565	372	354	419	2147	1451	978	6.50607	6.04509	7.72109	22.6949	23.285	14.6931	21.155	18.8558	25.873	74.2561	73.6863	48.4816
553552	NM_001020531	zgc:109934	zgc:109934	protein_coding	NP_001018367.1	ZDB-GENE-050522-428	.	4.00565	394.275	0.195967	10.2162	1.67837e-24	2.48734e-22	9.30145	7.29984	7.73461	7.86577	7.88257	8.90323	9.05025	8.80406	124	142	148	908	717	578	6.19249	6.9248	7.7689	27.4498	32.8917	24.8432	20.1353	21.5997	26.0333	89.814	104.087	81.9731
553553	NM_001020532	cfd	complement factor D (adipsin)	protein_coding	NP_001018368.1	ZDB-GENE-050522-411	.	-2.28288	42.9021	0.439586	-2.70904	0.00674788	0.0272849	4.69384	5.90503	5.51961	5.31409	5.76642	5.29804	4.89408	5.08891	52	34	72	57	14	26	2.49086	1.61133	3.69306	1.65908	0.582298	1.0527	8.09922	5.02604	12.3753	5.42842	1.8427	3.47351
553575	NM_001020554,XM_005169592,XM_017359015,XM_021481023	gsr	glutathione reductase	protein_coding	NP_001018390.1;XP_005169649.1;XP_017214504.1;XP_021336698.1	ZDB-GENE-050522-116	.	2.31513	486.778	0.181641	6.66752	2.60157e-11	9.25086e-10	9.40885	8.19874	8.50493	8.54089	8.41812	9.26702	9.19596	9.02719	274	269	231	1120	694	605	5.68507	5.39829	5.08437	14.1259	13.4278	10.6799	18.4854	16.8383	17.0375	46.2189	42.4928	35.2397
553578	NM_001020557	tmx3	thioredoxin-related transmembrane protein 3	protein_coding	NP_001018393.2	ZDB-GENE-050522-396	.	-3.52686	464.99	0.246962	-7.363	1.7982e-13	8.82615e-12	7.6825	9.50094	9.17272	8.79051	9.39016	8.13229	8.10239	8.16106	681	412	820	304	194	224	20.0694	11.8548	25.4846	5.40407	5.2392	5.65597	65.257	36.9772	85.3979	17.6818	16.5797	18.6625
553584	NM_001020562,XM_009295679	endou2	endonuclease, polyU-specific 2	protein_coding	NP_001018398.1;XP_009293954.1	ZDB-GENE-050522-373	.	-8.13979	194.039	0.329017	-9.19402	3.78415e-20	3.82932e-18	5.40265	8.43369	7.63845	8.2481	7.56064	6.40012	6.25061	6.4248	245	447	213	69	32	50	10.1252	18.4064	9.2839	1.64052	1.15731	1.69301	32.9227	57.4129	31.11	5.36769	3.66236	5.5863
553593	NM_001020570	ccdc3b	coiled-coil domain containing 3b	protein_coding	NP_001018406.1	ZDB-GENE-050522-184	.	-2.15103	116.292	0.371516	-2.97436	0.00293597	0.0138371	6.21379	7.30708	7.12148	7.0463	6.9147	6.04423	6.6888	6.63573	162	138	118	47	98	96	2.76542	2.29956	2.11773	0.482786	1.52946	1.40292	8.99195	7.17274	7.09642	1.57965	4.84003	4.6291
553612	NM_001020586	mpeg1.2	macrophage expressed 1, tandem duplicate 2	protein_coding	NP_001018422.1	ZDB-GENE-050522-305	.	6.8509	20.9308	0.595594	4.66139	3.14088e-06	3.96642e-05	5.19241	2.4049	3.90416	3.82146	3.97446	4.32673	4.56316	4.65233	5	2	7	36	39	48	0.079469	0.032618	0.120611	0.357098	0.591701	0.676885	0.258399	0.101742	0.404161	1.1684	1.87246	2.23346
553622	NM_001020596	phlda2	pleckstrin homology-like domain, family A, member 2	protein_coding	NP_001018432.1	ZDB-GENE-050522-73	.	2.77832	269.199	0.249851	5.90035	3.62729e-09	8.88298e-08	8.62929	7.15397	7.48638	7.43906	7.6634	8.24655	8.55697	8.12141	121	105	149	532	510	326	5.8058	4.94138	7.52827	15.4667	22.5293	13.4796	18.878	15.4131	25.2269	50.6062	71.2947	44.4777
553628	XM_005164344,XR_001798147	ftr43	finTRIM family, member 43, transcript variant X1	protein_coding	XP_005164401.1	ZDB-GENE-090507-8	.	5.9122	50.0673	0.429905	5.96341	2.47031e-09	6.23577e-08	6.42117	3.85176	4.95281	5.04445	4.79955	5.57247	6.05025	5.86582	14	17	7	84	111	92	0.323694	0.37174	0.156853	1.17713	2.35691	1.82275	1.05252	1.15952	0.525607	3.85149	7.45852	6.01438
553634	NM_001020607,XM_005156332,XM_021480111	casp7	caspase 7, apoptosis-related cysteine peptidase	protein_coding	NP_001018443.1;XP_005156389.1;XP_021335786.1	ZDB-GENE-050522-506	.	-3.69678	676.704	0.276726	-6.81638	9.33639e-12	3.55665e-10	8.16987	10.0572	9.63543	9.95657	9.41985	8.65724	8.35913	8.80096	912	1206	681	447	191	385	15.4808	19.5154	12.2132	4.5009	2.86611	5.71402	50.3369	60.8722	40.9258	14.7267	9.0699	18.8541
553666	NM_001020639	cfap52	cilia and flagella associated protein 52	protein_coding	NP_001018475.1	ZDB-GENE-050522-296	.	3.66035	71.9176	0.330831	5.65841	1.52779e-08	3.26464e-07	6.81819	4.95378	5.45309	5.7884	5.56413	6.50773	6.33808	6.32437	19	38	24	192	104	108	0.383061	0.754926	0.500259	2.37481	1.94443	1.88572	1.24555	2.35475	1.67635	7.77023	6.1532	6.22215
553679	NM_001020652,XM_021480112	sncgb	synuclein, gamma b (breast cancer-specific protein 1)	protein_coding	NP_001018488.1;XP_021335787.1	ZDB-GENE-050522-235	.	-3.20781	4791.75	0.2217	-7.58498	3.32537e-14	1.76822e-12	11.1537	12.8347	12.6595	12.4485	12.4462	11.2817	11.7081	11.5664	7715	5756	5833	2375	2816	2488	144.009	107.053	115.468	30.0436	49.5207	42.1931	468.254	333.918	386.928	98.3009	156.71	139.221
553684	NM_001020657,XM_021480113	dhrs7cb	dehydrogenase/reductase (SDR family) member 7Cb	protein_coding	NP_001018493.1;XP_021335788.1	ZDB-GENE-050522-226	.	-2.40542	125.125	0.451599	-2.80401	0.00504711	0.0216108	6.19911	7.4658	6.82741	7.67309	6.49662	6.4551	6.39671	6.6065	110	287	64	103	62	92	3.48094	8.8152	2.09145	1.95339	1.79392	2.48195	11.3185	27.4963	7.00835	6.39135	5.67694	8.18947
553688	NM_001020663	bach1b	BTB and CNC homology 1, basic leucine zipper transcription factor 1 b	protein_coding	NP_001018499.1	ZDB-GENE-050522-220	.	2.37636	117.198	0.274194	4.55426	5.25704e-06	6.28301e-05	7.36686	6.11553	6.66405	6.29186	6.44808	7.10771	7.13054	7.00067	85	42	57	251	174	156	3.27611	1.5649	2.31352	5.8672	6.16535	5.19702	10.6525	4.88123	7.7525	19.1971	19.5105	17.1482
553694	NM_001020668	zgc:112242	zgc:112242	protein_coding	NP_001018504.1	ZDB-GENE-050522-63	.	-3.76455	116.502	0.41017	-4.66264	3.12175e-06	3.94659e-05	5.60351	7.52657	6.8532	7.52612	6.64251	6.35933	6.05292	6.02262	127	264	91	102	39	39	4.83325	9.85714	3.64632	2.34735	1.35509	1.24981	15.7157	30.7463	12.2187	7.68038	4.28823	4.1239
553698	NM_001243171	zgc:112271	zgc:112271	protein_coding	NP_001230100.1	ZDB-GENE-050522-443	.	-3.42786	33.1207	0.462317	-3.84435	0.000120871	0.000945043	3.88878	5.68449	5.14388	5.43882	4.88846	4.6857	4.52825	4.59687	44	65	26	28	11	15	3.93507	5.68167	2.38466	1.51306	0.84531	1.13171	12.7952	17.7222	7.9909	4.95064	2.67502	3.73421
553700	NM_001020673	creb3l3a	cAMP responsive element binding protein 3-like 3a	protein_coding	NP_001018509.1	ZDB-GENE-030131-4298	.	2.08246	52.7395	0.435035	2.43265	0.0149888	0.0508954	6.1577	5.09113	5.42577	5.18997	5.62364	5.50271	6.02519	5.94582	31	16	43	59	91	86	0.878757	0.446165	1.28381	1.01278	2.37302	2.09409	2.85734	1.39167	4.30201	3.31376	7.5095	6.90971
553701	NM_001020674	gda	guanine deaminase	protein_coding	NP_001018510.1	ZDB-GENE-050522-434	.	-9.65203	33.96	0.476206	-6.86852	6.48715e-12	2.54729e-10	2.69797	5.9409	5.01253	5.25691	5.37523	4.22179	4.32344	4.3339	40	55	66	7	7	8	0.919021	1.23321	1.58055	0.095826	0.139224	0.139798	2.98826	3.8466	5.29637	0.313538	0.440579	0.461279
553710	NM_001020681	crygm2d1	crystallin, gamma M2d1	protein_coding	NP_001018517.2	ZDB-GENE-050522-395	.	-13.4128	8351.83	0.294241	-12.7295	4.05377e-37	1.38984e-34	10.1786	13.9241	13.0703	13.7537	12.9332	11.1312	11.0498	11.3051	11073	20477	9132	1609	935	1508	774.866	1400.57	674.182	68.0175	59.9978	90.6628	2519.53	4368.63	2259.16	222.549	189.865	299.153
553726	NM_001020697	trim35-7	tripartite motif containing 35-7	protein_coding	NP_001018533.1	ZDB-GENE-050522-333	.	2.56545	90.3615	0.291019	4.67053	3.00427e-06	3.81488e-05	7.02419	5.65988	6.21563	5.8939	6.12458	6.63821	6.80131	6.66872	58	29	47	175	146	130	1.60634	0.764949	1.37253	2.92137	3.70776	3.08355	5.22312	2.38602	4.5993	9.55853	11.7333	10.1745
553736	NM_001020707,XM_005162445,XM_009297070,XM_017353569,XM_017353570,XM_017353571,XM_017353572,XM_017353573,XM_017353574,XM_017353575,XM_017353576,XM_021469808,XM_021469809	zgc:112994	zgc:112994	protein_coding	NP_001018543.1;XP_005162502.1;XP_009295345.1;XP_017209058.1;XP_017209059.1;XP_017209060.1;XP_017209061.1;XP_017209062.1;XP_017209063.1;XP_017209064.1;XP_017209065.1;XP_021325483.1;XP_021325484.1	ZDB-GENE-050522-519	.	-2.33922	358.698	0.298349	-4.10938	3.96721e-05	0.000366937	7.74979	8.972	8.6541	8.88051	8.56671	7.77901	8.35532	7.85556	430	521	369	221	325	175	5.93131	6.98734	5.46659	1.88071	4.13291	2.08641	19.2861	21.7948	18.3183	6.15358	13.0788	6.88437
553741	NM_001020712	zgc:113090	zgc:113090	protein_coding	NP_001018548.1	ZDB-GENE-050522-532	.	2.17971	118.747	0.243701	4.61275	3.97373e-06	4.8735e-05	7.34678	6.22328	6.54534	6.42974	6.65541	7.13684	7.12731	7.00134	68	52	77	254	169	152	1.6359	1.23116	1.95225	3.71935	3.75644	3.15007	5.31926	3.84023	6.54189	12.1695	11.8874	10.394
553748	NM_001020719,XM_021479619	zgc:113276	zgc:113276	protein_coding	NP_001018555.1;XP_021335294.1	ZDB-GENE-050522-7	.	-4.38158	106.373	0.378123	-5.63693	1.73105e-08	3.67844e-07	5.30537	7.43631	6.92012	7.22992	6.65814	5.90712	5.73601	6.2159	150	203	102	52	22	64	3.46217	4.56938	2.38916	0.695408	0.44784	1.20569	11.2575	14.2528	8.00597	2.27533	1.41721	3.97832
553753	NM_001020724	zgc:113307	zgc:113307	protein_coding	NP_001018560.1	ZDB-GENE-050522-29	.	-3.10432	25.1882	0.460477	-3.5491	0.000386545	0.00255962	3.63177	5.24719	4.79267	4.88793	4.61357	4.2171	4.31388	4.40137	36	40	24	13	12	17	1.03791	1.11155	0.719807	0.219804	0.314066	0.400431	3.37483	3.46713	2.41204	0.719185	0.993873	1.32127
553766	NM_001020732	cabp5b	calcium binding protein 5b	protein_coding	NP_001018568.1	ZDB-GENE-050522-146	.	-2.14655	71.8073	0.33829	-3.25762	0.0011235	0.00622025	5.51816	6.61156	6.46115	6.03323	6.41784	5.75057	5.99771	5.76495	108	54	97	57	59	41	4.06184	1.96916	3.8751	1.2994	2.04336	1.31258	13.2074	6.14218	12.9853	4.25156	6.46629	4.331
553767	NM_001172635	atpv0e2	ATPase, H+ transporting V0 subunit e2	protein_coding	NP_001166106.1	ZDB-GENE-050522-135	.	-2.59989	321.96	0.332504	-4.14566	3.38836e-05	0.000320305	7.48615	8.85994	8.87296	8.1866	8.50848	7.47756	8.0278	7.82782	601	254	380	162	240	194	28.6757	11.8136	19.1105	4.66797	10.4814	7.94004	93.241	36.8488	64.0384	15.2733	33.1687	26.1991
553782	NM_001020746	zgc:110425	zgc:110425	protein_coding	NP_001018582.1	ZDB-GENE-050522-103	.	4.03585	332.553	0.182841	11.0089	3.46323e-28	6.52081e-26	9.05847	7.04363	7.62969	7.56481	7.57737	8.58759	8.74822	8.68871	128	108	112	710	571	566	4.32377	3.56916	3.97806	14.5601	17.7669	16.5023	14.059	11.1329	13.3303	47.6399	56.224	54.4514
553790	NM_001020752	trmt112	tRNA methyltransferase 11-2 homolog (S. cerevisiae)	protein_coding	NP_001018588.1	ZDB-GENE-050522-30	.	2.1287	69.9487	0.326298	3.34042	0.000836506	0.00486835	6.57504	5.47753	5.97101	5.81052	5.67001	6.14019	6.45764	6.2592	53	37	28	112	118	95	3.11029	2.10716	1.74482	3.98636	6.40793	4.8344	10.1133	6.57261	5.84683	13.0431	20.2781	15.9517
553797	NM_001020759	wdr78	WD repeat domain 78	protein_coding	NP_001018595.1	ZDB-GENE-050522-322	.	3.13031	111.731	0.323708	5.08578	3.66122e-07	5.82424e-06	7.40394	5.75767	6.22051	6.49777	5.99788	6.97	7.1505	6.97802	46	69	27	229	193	165	0.685063	1.01462	0.425895	2.08739	2.66779	2.12922	2.22753	3.1648	1.42716	6.82981	8.44233	7.02561
553804	NM_001020766	mcee	methylmalonyl CoA epimerase	protein_coding	NP_001018602.1	ZDB-GENE-050522-368	.	-2.0601	60.4222	0.313729	-3.3236	0.000888627	0.00512069	5.30668	6.34456	6.06557	6.10991	6.02213	5.55464	5.52828	5.80348	74	74	66	50	31	56	2.19744	2.14337	2.05693	0.890575	0.823715	1.40724	7.14512	6.68558	6.89269	2.91391	2.60668	4.64337
554046	NM_001023574,XM_005161178,XM_009295309,XM_021468839,XM_021468840	phkg1b	phosphorylase kinase, gamma 1b (muscle)	protein_coding	NP_001018868.1;XP_005161235.2;XP_009293584.1;XP_021324514.1;XP_021324515.1	ZDB-GENE-050522-52	.	-2.89277	449.502	0.275928	-5.5538	2.79518e-08	5.66208e-07	7.85064	9.3841	8.916	9.42993	8.74215	8.25147	8.15866	8.22581	511	844	396	360	211	246	10.8183	17.6943	9.02186	4.66768	4.0587	4.31774	35.1766	55.1918	30.2319	15.2723	12.8439	14.2469
554050	NM_001024072	itgbl1	integrin, beta-like 1	protein_coding	NP_001019243.1	ZDB-GENE-050522-410	.	-2.26937	222.313	0.303759	-3.89221	9.93339e-05	0.000805152	7.08833	8.26934	7.88932	8.34899	7.63769	7.28427	7.36058	7.46296	246	393	170	177	132	162	8.34598	13.057	6.09658	3.63008	4.101	4.72404	27.1375	40.7273	20.4294	11.8774	12.9778	15.5875
554089	NM_001024391	s100z	S100 calcium binding protein Z	protein_coding	NP_001019562.1	ZDB-GENE-050522-69	.	6.34623	19.4603	0.695913	3.83079	0.00012773	0.00099259	5.07092	2.40823	3.78317	3.76505	3.79403	4.5491	4.55713	3.88711	5	4	5	66	46	10	0.158203	0.14046	0.175982	1.56834	1.6506	0.307478	0.514408	0.43812	0.589708	5.1315	5.22338	1.01456
554091	NM_001024393	dnajb9b	DnaJ (Hsp40) homolog, subfamily B, member 9b	protein_coding	NP_001019564.1	ZDB-GENE-050522-76	.	2.6907	56.222	0.360569	3.96035	7.48395e-05	0.000631804	6.359	4.92419	5.46125	5.52556	5.27615	5.76432	6.08913	6.09387	30	32	18	85	93	99	1.31494	1.36021	0.807269	2.24225	3.72112	3.71687	4.27562	4.24276	2.70512	7.33649	11.7756	12.2643
554117	NM_001024413,XM_021479174,XM_021479175	morn5	MORN repeat containing 5	protein_coding	NP_001019584.1;XP_021334849.1;XP_021334850.1	ZDB-GENE-050522-267	.	4.09837	30.1237	0.449523	4.52713	5.9789e-06	7.02873e-05	5.59668	3.56753	4.41159	4.6263	4.39853	5.08563	5.03043	5.1312	8	16	7	71	44	55	0.206364	0.521447	0.201156	1.7256	1.1323	1.29157	0.671007	1.62649	0.674064	5.64606	3.58321	4.26169
554127	NM_001024422	tubb2	tubulin, beta 2A class IIa	protein_coding	NP_001019593.1	ZDB-GENE-050522-384	.	-2.23456	489.84	0.179443	-6.4644	1.01704e-10	3.28125e-09	8.24277	9.40251	9.14439	9.25791	9.09991	8.48438	8.42879	8.62769	600	639	542	428	265	367	16.5303	17.1987	15.7533	7.11158	6.68587	8.69003	53.7494	53.6459	52.7887	23.2686	21.1577	28.6738
554132	NM_001024427	crygmxl2	crystallin, gamma MX, like 2	protein_coding	NP_001019598.1	ZDB-GENE-050522-401	.	-13.0523	4569.28	0.283921	-13.0537	6.05178e-39	2.43887e-36	9.34458	13.0513	12.3492	12.8049	12.0628	10.3754	10.1387	10.4622	7004	10320	4952	1026	453	834	383.447	552.206	285.983	33.9156	22.7055	39.1905	1246.81	1722.43	958.318	110.97	71.8524	129.314
554141	NM_001327926	c9	complement component 9	protein_coding	NP_001314855.1	ZDB-GENE-050522-442	.	2.23333	237.231	0.261766	4.42838	9.49422e-06	0.000105358	8.35737	7.19481	7.54245	7.30018	7.59336	7.84921	8.28307	8.13832	145	94	148	353	399	357	2.98669	1.8929	3.21181	4.39145	7.53994	6.3197	9.71145	5.90431	10.7626	14.3685	23.8604	20.8526
554148	NM_001024376	pdlim3a	PDZ and LIM domain 3a	protein_coding	NP_001019547.1	ZDB-GENE-050505-1	.	-2.20616	45.0893	0.33008	-3.45836	0.000543482	0.0034008	4.81404	5.95533	5.73935	5.57798	5.59337	5.22544	5.26581	5.14612	66	48	50	43	31	25	1.92337	1.36984	1.52391	0.75663	0.829167	0.612104	6.25398	4.2728	5.10657	2.47565	2.62393	2.01971
554157	NM_001024409	ctss2.1	cathepsin S, ortholog2, tandem duplicate 1	protein_coding	NP_001019580.2	ZDB-GENE-050522-559	.	3.654	24.0451	0.523655	3.57005	0.00035691	0.00238956	5.23963	3.36569	4.12693	4.19954	4.32369	4.50675	4.6986	4.91309	6	8	13	36	36	55	0.192646	0.247016	0.48626	0.765931	1.14924	1.67382	0.626403	0.770488	1.62944	2.50608	3.6368	5.52297
554166	NM_001004016,XM_005157060	st3gal7	ST3 beta-galactoside alpha-2,3-sialyltransferase 7	protein_coding	NP_001004016.2;XP_005157117.1	ZDB-GENE-060322-2	.	-2.12776	33.9789	0.381816	-2.85304	0.00433029	0.019074	4.45313	5.52525	5.13484	5.26924	5.20504	4.71585	4.90795	4.89936	37	44	40	23	25	26	0.662314	0.698119	0.968866	0.221396	0.363236	0.519104	2.15356	2.17756	3.24663	0.724394	1.14947	1.71285
554167	NM_001024447	tnfb	tumor necrosis factor b (TNF superfamily, member 2)	protein_coding	NP_001019618.1	ZDB-GENE-050601-2	.	6.34806	12.5504	0.698698	3.81612	0.000135566	0.00104325	4.44007	1.76302	3.35749	3.30196	3.33345	3.72724	3.86011	3.68904	4	2	3	29	27	19	0.111818	0.060404	0.092334	0.615476	0.863658	0.575138	0.363584	0.188412	0.309407	2.0138	2.73308	1.89774
554168	NM_001024448,XM_021476875,XM_021476876	myh11a	myosin, heavy chain 11a, smooth muscle	protein_coding	NP_001019619.1;XP_021332550.1;XP_021332551.1	ZDB-GENE-050531-1	.	-2.04579	1390.4	0.180669	-5.71572	1.09239e-08	2.41979e-07	9.83497	10.8669	10.5808	10.8284	10.5618	9.96377	10.1241	10.0944	1551	1913	1443	1185	975	995	9.6097	11.5615	9.40578	4.42604	5.53686	5.31008	31.2466	36.0623	31.5184	14.4817	17.5216	17.5213
554272	NM_001024819	rhd	Rh blood group, D antigen	protein_coding	NP_001019990.1	ZDB-GENE-051213-1	.	-2.32854	16.803	0.605078	-2.01532	0.0438716	0.116349	3.34804	4.54987	3.84535	4.23185	4.22511	3.75654	3.9615	3.81198	9	26	26	10	15	9	0.195029	0.567891	0.61415	0.132997	0.301746	0.166581	0.63415	1.77136	2.05799	0.435157	0.954886	0.549655
554458	NM_001003526,XM_005164130	zgc:100868	zgc:100868	protein_coding	NP_001003526.1;XP_005164187.1	ZDB-GENE-040801-33	.	4.20651	587.714	0.324022	6.39657	1.5891e-10	4.95295e-09	9.89108	7.81947	7.97629	8.2556	8.63851	9.67821	9.55123	9.19366	117	173	301	1705	1000	713	1.34632	1.94913	3.66944	11.9379	10.6255	7.09357	4.37765	6.0797	12.2961	39.0601	33.6248	23.4061
554477	NM_213397,XM_005164819,XM_005164820,XM_021475017	pfkfb3	6-phosphofructo-2-kinase/fructose-2,6-biphosphatase 3	protein_coding	NP_998562.1;XP_005164876.1;XP_005164877.1;XP_021330692.1	ZDB-GENE-040426-2724	.	2.99904	1806.21	0.236909	6.68823	2.25894e-11	8.10781e-10	11.4036	9.81918	10.0607	10.436	9.9802	11.0639	11.2273	11.0064	702	1071	596	3825	3062	2551	11.7098	19.091	10.4676	40.0621	48.0111	36.8532	38.0754	59.5484	35.0764	131.081	151.933	121.602
554673	NM_001002736	asb1	ankyrin repeat and SOCS box containing 1	protein_coding	NP_001002736.1	ZDB-GENE-040718-234	.	2.66675	37.5765	0.387159	3.65504	0.000257138	0.00179754	5.77434	4.35192	4.99054	4.92197	4.80816	5.27596	5.36637	5.5192	23	18	13	66	52	70	0.753482	0.572411	0.445383	1.3323	1.58606	1.99854	2.45	1.78546	1.49246	4.3592	5.01913	6.59443
554700	NM_001243082,NM_212799	pde6g	phosphodiesterase 6G, cGMP-specific, rod, gamma	protein_coding	NP_001230011.1;NP_997964.1	ZDB-GENE-030904-1	.	-3.6534	621.216	0.329584	-5.67152	1.41537e-08	3.05282e-07	8.06288	9.9293	9.85624	9.0415	9.61804	8.19206	8.65951	8.57759	1225	462	904	250	330	313	31.4992	11.5961	24.5029	3.86998	7.78018	6.90855	102.422	36.1705	82.1083	12.6623	24.6207	22.7956
554826	NM_213497	crip2	cysteine-rich protein 2	protein_coding	NP_998662.2	ZDB-GENE-040426-2889	.	-2.42947	347.103	0.214696	-5.96492	2.44761e-09	6.19207e-08	7.66439	8.94058	8.7306	8.76798	8.51991	7.809	8.02689	8.07099	476	465	354	236	215	242	10.388	9.91464	8.1427	3.10564	4.30195	4.52688	33.7772	30.9256	27.2858	10.1615	13.6137	14.937
555179	XM_005166601,XM_009303477	gramd2aa	GRAM domain containing 2Aa, transcript variant X1	protein_coding	XP_005166658.1;XP_009301752.1	ZDB-GENE-040724-9	.	-2.02403	302.703	0.253014	-4.02045	5.80872e-05	0.000506961	7.64601	8.66216	8.60668	8.0876	8.55365	7.86453	7.94537	7.83967	448	224	401	288	215	197	11.0856	5.37716	10.4453	4.27913	4.82002	4.14893	36.0455	16.7724	35.0017	14.001	15.2531	13.6899
555184	NM_001030080	grapb	GRB2-related adaptor protein b	protein_coding	NP_001025251.2	ZDB-GENE-050913-4	.	-3.11001	69.3102	0.340372	-4.8092	1.51534e-06	2.09819e-05	5.07869	6.71186	6.50096	6.00919	6.35583	5.60059	5.70913	5.52853	123	58	97	49	40	29	1.68069	0.769302	1.39757	0.403217	0.501832	0.337167	5.46489	2.3996	4.68319	1.3193	1.58807	1.11252
555251	NM_001144784	inaa	internexin neuronal intermediate filament protein, alpha a	protein_coding	NP_001138256.1	ZDB-GENE-060531-65	.	-4.4612	332.589	0.35117	-6.14356	8.06927e-10	2.23594e-08	6.93142	9.08513	8.87667	8.09986	8.81865	7.33904	7.74214	7.28805	632	244	565	145	177	93	15.0663	5.68884	14.2123	2.08113	3.85457	1.8908	48.9891	17.7446	47.6249	6.80932	12.1979	6.2389
555254	XM_021481280	itga6l	integrin, alpha 6, like, transcript variant X1	protein_coding	XP_021336955.1	ZDB-GENE-040914-57	.	-2.53744	43.2199	0.341541	-3.93327	8.37976e-05	0.000698445	4.61469	5.9528	5.57157	5.65808	5.53038	5.04327	5.0476	5.19944	55	59	49	32	21	32	0.941629	0.989009	0.897087	0.331698	0.322172	0.471277	3.06177	3.08491	3.0061	1.08529	1.01953	1.55503
555258	NM_001302254	si:dkey-175a17.4	si:dkey-175a17.4	protein_coding	NP_001289183.1	ZDB-GENE-130530-865	.	-2.79395	127.823	0.278134	-5.32948	9.84923e-08	1.77448e-06	6.0676	7.559	7.00385	7.4205	7.19893	6.60547	6.38263	6.48584	130	205	159	119	54	69	3.12687	4.83108	4.04391	1.72346	1.17637	1.41917	10.1672	15.069	13.551	5.63905	3.72267	4.68273
555269	NM_001077140	vrtn	vertebrae development associated	protein_coding	NP_001070608.1	ZDB-GENE-060929-700	.	2.4017	41.0581	0.365274	3.46057	0.00053903	0.0033803	5.85781	4.59235	5.2039	4.99838	4.99216	5.58325	5.52367	5.44584	30	17	17	94	58	54	0.590607	0.326719	0.339286	1.11436	1.03917	0.909432	1.9204	1.0191	1.13693	3.6461	3.28848	3.00078
555288	NM_001130073,XM_005166710,XR_002459339	slc35a2	solute carrier family 35 (UDP-galactose transporter), member 2	protein_coding	NP_001123545.1;XP_005166767.1	ZDB-GENE-030616-62	.	2.073	717.294	0.162335	6.47871	9.25098e-11	3.0013e-09	9.91822	8.86735	9.10417	9.12753	9.09837	9.80408	9.72824	9.5888	423	408	399	1584	976	881	6.63188	5.71459	5.77827	16.831	17.2412	15.8738	21.564	17.8249	19.3627	55.0699	54.5603	52.3776
555297	NM_001110451	stk24a	serine/threonine kinase 24a (STE20 homolog, yeast)	protein_coding	NP_001103921.1	ZDB-GENE-070424-52	.	-6.42247	28.9336	0.452719	-5.92669	3.09099e-09	7.70935e-08	2.9811	5.64303	5.08139	4.95612	4.94719	4.187	4.24146	4.3252	52	40	40	9	7	11	1.50979	1.13669	1.21781	0.152138	0.183496	0.266871	4.9092	3.54555	4.08084	0.497786	0.580679	0.880572
555317	XM_021477719	si:ch211-276a23.5	si:ch211-276a23.5	protein_coding	XP_021333394.1	ZDB-GENE-141215-4	.	2.28274	43.6303	0.352662	3.37651	0.000734111	0.00436533	5.92467	4.72883	5.18062	5.03857	5.27136	5.52888	5.63253	5.64564	25	16	29	79	63	68	0.330345	0.199769	0.401868	0.645078	0.777598	0.783641	1.07414	0.623118	1.34664	2.11065	2.46074	2.58572
555328	NM_001110374	serpinh1a	serpin peptidase inhibitor, clade H (heat shock protein 47), member 1a	protein_coding	NP_001103844.1	ZDB-GENE-080219-21	.	-2.74687	277.844	0.262493	-5.55363	2.79796e-08	5.66273e-07	7.21363	8.6698	8.2309	8.66297	8.11511	7.49549	7.58853	7.63941	318	487	263	195	149	170	3.65484	5.47012	3.18324	1.35369	1.56971	1.66932	11.884	17.0623	10.6669	4.42917	4.9674	5.50813
555345	XM_001918606,XM_009296623,XM_009296626	ccdc13	coiled-coil domain containing 13, transcript variant X2	protein_coding	XP_001918641.4;XP_009294898.1;XP_009294901.1	ZDB-GENE-061207-11	.	2.33966	164.498	0.211727	5.7919	6.95953e-09	1.60832e-07	7.84904	6.62101	6.93932	7.03343	6.90359	7.50276	7.63215	7.61195	87	94	78	307	242	250	0.983473	0.990332	0.964409	2.74643	3.43695	2.71379	3.19783	3.08903	3.23169	8.98616	10.8763	8.95447
555379	NM_001044330,XM_009293619	si:dkeyp-59c12.1	si:dkeyp-59c12.1	protein_coding	NP_001037795.1;XP_009291894.1	ZDB-GENE-050419-167	.	-2.24386	14.3795	0.571363	-2.0407	0.0412804	0.111272	3.1638	4.30721	3.84126	3.90927	3.96809	3.56512	3.64971	3.7755	15	17	20	8	8	14	0.442495	0.557947	0.644208	0.219661	0.203328	0.36254	1.4388	1.74034	2.15871	0.718717	0.643438	1.19624
555427	XM_677926	si:ch211-242e8.1	si:ch211-242e8.1, transcript variant X1	protein_coding	XP_683018.3	ZDB-GENE-060503-600	.	-2.52699	192.016	0.264369	-5.0589	4.21679e-07	6.62543e-06	6.76537	8.10457	7.99699	7.58614	7.81223	7.19371	7.2007	6.92612	312	178	239	181	122	84	4.30806	2.40364	3.48088	1.51256	1.53913	0.991467	14.008	7.49741	11.6643	4.94902	4.87063	3.27147
555428	NM_001348047,XM_021468067	col28a1a	collagen, type XXVIII, alpha 1a	protein_coding	NP_001334976.1;XP_021323742.1	ZDB-GENE-070705-84	.	-2.59684	215.779	0.242983	-5.66604	1.46131e-08	3.13718e-07	6.9062	8.28362	7.70225	8.12726	8.08569	7.26497	7.30044	7.22352	200	313	303	178	125	118	1.67128	2.55515	2.6726	0.896185	1.10833	0.844196	5.43427	7.96998	8.95579	2.93226	3.50735	2.78552
555483	NM_001199991	ptgdsa	prostaglandin D2 synthase a	protein_coding	NP_001186920.1	ZDB-GENE-081022-118	.	-2.24247	41.8991	0.577374	-2.01791	0.0436007	0.115813	4.69494	5.85542	5.25268	5.94423	4.84114	4.89095	5.08881	5.04507	38	99	14	29	30	29	1.96931	5.04076	0.771957	0.890181	1.43205	1.3018	6.40337	15.7231	2.58679	2.91262	4.53179	4.29544
555548	NM_001201561	pln	phospholamban	protein_coding	NP_001188490.1	ZDB-GENE-060503-603	.	-2.46846	17.7171	0.54503	-2.39181	0.0167654	0.0555165	3.35447	4.6557	4.41357	4.14636	4.07304	3.92363	3.98441	3.82469	34	18	15	16	13	7	0.490321	0.256526	0.224499	0.134553	0.166773	0.087332	1.59431	0.800152	0.752288	0.440248	0.527761	0.288162
555567	NM_001111151	si:ch211-225p5.8	si:ch211-225p5.8	protein_coding	NP_001104621.1	ZDB-GENE-060503-783	.	-2.37527	39.5558	0.397659	-3.1386	0.00169757	0.00883437	4.55621	5.79663	5.39152	5.61858	5.26841	4.94475	5.14152	4.88202	47	63	36	31	32	18	0.56964	0.738831	0.450891	0.227634	0.347161	0.181987	1.85223	2.30455	1.51092	0.744805	1.09861	0.600487
555583	XM_017353955,XM_017353956,XM_678134	dlec1	deleted in lung and esophageal cancer 1, transcript variant X2	protein_coding	XP_017209444.1;XP_017209445.1;XP_683226.4	ZDB-GENE-091204-65	.	2.16529	223.384	0.27438	4.06209	4.86349e-05	0.000433693	8.25496	7.14243	7.09641	7.62325	7.47265	8.04484	8.0325	7.95477	77	160	132	468	310	299	0.618745	1.26218	1.12158	2.28735	2.29873	2.079	2.01189	3.93699	3.75835	7.48407	7.27442	6.85991
555601	NM_001077369	ccdc151	coiled-coil domain containing 151	protein_coding	NP_001070837.2	ZDB-GENE-061013-787	.	2.50202	106.689	0.261536	5.05894	4.21583e-07	6.62543e-06	7.25179	5.93003	6.22329	6.42192	6.32972	6.95738	7.063	6.81656	46	61	53	226	174	134	1.09633	1.40606	1.32129	3.24315	3.79745	2.73603	3.56481	4.38575	4.42758	10.6114	12.0172	9.02785
555617	NM_001145556	si:dkey-22i16.3	si:dkey-22i16.3	protein_coding	NP_001139028.1	ZDB-GENE-071005-4	.	-5.02455	64.8587	0.391884	-5.94307	2.79735e-09	7.0074e-08	4.44442	6.75415	6.09778	6.50219	5.96237	5.14229	5.43475	5.26213	84	133	66	22	30	21	3.0677	4.78362	2.53383	0.474879	0.996618	0.644246	9.97486	14.921	8.49075	1.55377	3.15384	2.12577
555705	NM_001080558,XM_009295313,XM_009295314,XM_009295315,XM_021468848	dnai1.2	dynein, axonemal, intermediate chain 1, paralog 2	protein_coding	NP_001074027.1;XP_009293588.1;XP_009293589.1;XP_009293590.1;XP_021324523.1	ZDB-GENE-070112-1302	.	2.21525	194.012	0.200076	5.73517	9.74128e-09	2.18096e-07	8.06186	6.91658	7.20181	7.25932	7.20427	7.87595	7.7143	7.85498	107	109	102	422	233	293	1.95688	1.99948	2.03854	5.01179	3.95196	4.68333	6.36293	6.23674	6.83107	16.3983	12.5061	15.4532
555725	NM_001037374,XM_005157481	pcyt1bb	phosphate cytidylyltransferase 1, choline, beta b	protein_coding	NP_001032451.1;XP_005157538.1	ZDB-GENE-051120-48	.	-2.01396	38.66	0.49864	-2.02558	0.0428081	0.114369	4.68641	5.6885	5.25782	5.71343	4.93061	4.84675	5.05207	5.05576	40	76	19	27	29	31	1.04049	1.94364	0.525507	0.427461	0.689452	0.694656	3.38323	6.06259	1.76095	1.39863	2.1818	2.2921
555778	NM_001039808	slc2a1a	solute carrier family 2 (facilitated glucose transporter), member 1a	protein_coding	NP_001034897.1	ZDB-GENE-030131-3158	.	-5.20998	191.599	0.387478	-6.14559	7.96692e-10	2.21559e-08	5.95539	8.32708	7.90903	7.38932	8.09786	6.38926	6.94477	6.44016	317	161	371	59	102	45	8.28589	4.10255	10.2286	0.921253	2.4349	1.00714	26.9422	12.7966	34.2757	3.01428	7.70533	3.32317
555782	XM_009297924,XM_009297926,XM_021470645	ccdc135	coiled-coil domain containing 135, transcript variant X2	protein_coding	XP_009296199.1;XP_009296201.1;XP_021326320.1	ZDB-GENE-120406-10	.	2.53286	529.769	0.210492	6.3697	1.89404e-10	5.81657e-09	9.56883	8.2292	8.31625	8.66456	8.63206	9.33696	9.3028	9.27189	196	299	291	1161	750	767	2.91464	4.32966	4.55489	10.4148	10.2556	9.79637	9.47717	13.505	15.2632	34.0765	32.4542	32.3243
555790	NM_001145559	si:dkey-9i23.15	si:dkey-9i23.15	protein_coding	NP_001139031.1	ZDB-GENE-090313-361	.	-2.08676	73.7678	0.284996	-3.7238	0.000196246	0.00142838	5.58506	6.63709	6.48668	6.36656	6.23223	5.81393	5.98144	5.91623	107	85	71	60	54	51	3.27018	2.53557	2.30343	1.1014	1.52084	1.33655	10.6332	7.9089	7.71868	3.60371	4.81276	4.41011
555793	XM_021477267,XM_021477268,XR_002459113	LOC555793	protein FAM107B, transcript variant X1	protein_coding	XP_021332942.1;XP_021332943.1	.	.	-2.00085	113.283	0.377906	-2.64779	0.00810208	0.0314699	6.24538	7.23554	7.01715	6.70584	7.15482	6.10512	6.75832	6.50761	145	89	164	56	111	81	1.38892	0.833119	1.80828	0.334496	1.05726	0.691735	4.51616	2.59865	6.05946	1.09445	3.34573	2.28246
555812	NM_131176,XM_009305562	ucp2	uncoupling protein 2	protein_coding	NP_571251.1;XP_009303837.1	ZDB-GENE-990708-8	.	-2.18716	1623.24	0.256849	-4.39582	1.10357e-05	0.000120485	9.99245	11.1214	10.6537	11.2454	10.6638	10.192	10.3165	10.1795	1551	2788	1492	1429	1121	998	45.9857	80.7527	47.0906	25.0174	30.4328	25.2969	149.526	251.883	157.798	81.8553	96.3057	83.4702
555852	NM_001199998	si:dkey-7n6.2	si:dkey-7n6.2	protein_coding	NP_001186927.1	ZDB-GENE-091204-262	.	-2.22073	58.7712	0.443297	-2.59653	0.00941697	0.0354677	5.19721	6.33726	5.91903	5.69206	6.30525	5.26277	5.48835	5.77162	65	42	106	30	33	59	1.92283	1.19295	3.30647	0.533329	0.875385	1.4944	6.25221	3.72105	11.0798	1.74502	2.77019	4.93095
555881	NM_001089372,XM_021470494,XR_002456667	zgc:162634	zgc:162634	protein_coding	NP_001082841.1;XP_021326169.1	ZDB-GENE-050506-109	.	-3.08059	94.9215	0.306783	-5.29106	1.21612e-07	2.15385e-06	5.5296	7.16641	6.82902	6.68994	6.83889	6.20665	6.05735	5.81601	138	108	133	92	47	30	3.14166	2.5501	3.33129	1.50543	1.32247	0.723038	10.2153	7.95424	11.163	4.92568	4.18499	2.38575
555921	XM_005163446,XM_678581	kcnb2	potassium voltage-gated channel, Shab-related subfamily, member 2, transcript variant X1	protein_coding	XP_005163503.1;XP_683673.2	ZDB-GENE-070912-170	.	-3.28426	772.805	0.229254	-7.48327	7.24944e-14	3.72543e-12	8.496	10.2102	10.0003	9.54759	10.0311	8.81538	8.96653	8.92022	1230	694	1209	472	389	387	10.8293	5.96633	11.226	2.50928	3.13821	2.91977	35.2121	18.6101	37.6179	8.21021	9.93098	9.63412
556023	XM_009303124	dnah2	dynein, axonemal, heavy chain 2, transcript variant X1	protein_coding	XP_009301399.1	ZDB-GENE-130530-910	.	2.39726	1355.38	0.230131	5.48115	4.2256e-08	8.268e-07	10.9013	9.64052	9.71462	10.1667	9.82509	10.7685	10.6084	10.5776	552	928	610	3194	1796	1838	1.74681	2.87185	2.03486	6.10801	5.21353	4.99885	5.67988	8.95785	6.81875	19.985	16.4984	16.4943
556083	XM_021476629	si:ch211-117c19.1	si:ch211-117c19.1	protein_coding	XP_021332304.1	ZDB-GENE-060526-15	.	-6.67581	81.7811	0.416717	-6.57267	4.94221e-11	1.67692e-09	4.44241	7.14792	6.67536	6.31887	6.67534	5.13488	5.64913	5.41883	147	88	140	13	35	22	2.02866	1.18486	2.04002	0.102305	0.431086	0.256902	6.59632	3.69581	6.83603	0.334735	1.36419	0.847678
556126	XM_009291903,XM_678858	gal3st2	galactose-3-O-sulfotransferase 2, transcript variant X1	protein_coding	XP_009290178.1;XP_683950.6	ZDB-GENE-131127-533	.	-3.55561	218.767	0.260701	-7.0199	2.22022e-12	9.40973e-11	6.58673	8.41539	8.25203	7.73195	8.07033	7.04704	7.02401	7.16902	396	202	307	135	86	115	6.21372	2.97709	4.94588	1.21111	1.2762	1.45885	20.2044	9.28611	16.5734	3.96269	4.03857	4.81365
556154	NM_001130397,XM_005165471	mamdc2a	MAM domain containing 2a	protein_coding	NP_001123869.1;XP_005165528.1	ZDB-GENE-060526-16	.	-3.22693	76.6308	0.341948	-4.94275	7.70299e-07	1.13499e-05	5.16955	6.8737	6.26064	6.73192	6.3298	5.84682	5.6474	5.66178	81	141	85	68	30	33	1.73002	2.90264	1.91762	0.883605	0.5787	0.583357	5.62529	9.05389	6.42588	2.8911	1.83132	1.92485
556181	NM_001190303,XM_005169165,XM_005169166,XM_021479178	slc1a3b	solute carrier family 1 (glial high affinity glutamate transporter), member 3b	protein_coding	NP_001177232.1;XP_005169222.1;XP_005169223.1;XP_021334853.1	ZDB-GENE-090708-3	.	2.36445	2007.65	0.237457	5.22831	1.71063e-07	2.93245e-06	11.4626	10.2205	10.6527	10.2924	10.4963	10.9305	11.383	11.2915	1334	783	1042	3003	3336	3200	22.8471	13.0752	18.9247	36.0063	55.8988	50.6724	74.2889	40.7839	63.416	117.81	176.894	167.199
556193	NM_001145563,XM_017354910	sgms2	sphingomyelin synthase 2	protein_coding	NP_001139035.1;XP_017210399.1	ZDB-GENE-070730-2	.	-2.42762	27.0043	0.552447	-2.31614	0.0205509	0.0651947	3.98725	5.25359	4.75789	5.0739	4.61594	4.27559	4.32731	4.69228	30	49	21	13	10	30	0.817162	1.44772	0.551199	0.222991	0.219529	0.679832	2.65706	4.51569	1.84704	0.729613	0.694707	2.24319
556200	XM_678953	si:ch211-117k10.3	si:ch211-117k10.3	protein_coding	XP_684045.1	ZDB-GENE-141212-273	.	2.27251	1085.89	0.140713	8.41632	3.8851e-17	2.92605e-15	10.5584	9.37452	9.6225	9.70089	9.61434	10.3523	10.2893	10.3505	587	608	552	2276	1423	1614	14.7402	14.9387	14.6173	34.5495	32.8083	34.8564	47.9287	46.5967	48.9818	113.044	103.823	115.013
556291	XM_679055	gnpda2	glucosamine-6-phosphate deaminase 2	protein_coding	XP_684147.2	ZDB-GENE-091117-41	.	2.27102	158.227	0.217795	5.43329	5.53235e-08	1.05991e-06	7.77988	6.59513	6.8373	6.98608	6.93879	7.42805	7.5844	7.54465	77	91	86	288	235	237	2.59586	2.99727	3.04913	5.89772	7.29744	6.89314	8.44063	9.34904	10.2175	19.297	23.093	22.7447
556301	XM_017351790,XM_017351791,XM_021467467	rbm33b	RNA binding motif protein 33b, transcript variant X3	protein_coding	XP_017207279.1;XP_017207280.1;XP_021323142.1	ZDB-GENE-060526-276	.	2.9807	40.2738	0.383507	4.10854	3.98168e-05	0.000367765	5.91582	4.3345	4.88532	4.93157	5.04536	5.33452	5.59715	5.56033	15	16	22	67	69	69	0.282769	0.285578	0.441489	0.755812	1.19605	1.10797	0.919442	0.890773	1.47941	2.47297	3.78494	3.65588
556318	NM_001030100	noxa1	NADPH oxidase activator 1	protein_coding	NP_001025271.1	ZDB-GENE-050913-32	.	5.34396	21.6678	0.515424	4.69111	2.71733e-06	3.48909e-05	5.19096	2.76703	4.03808	3.96455	4.05064	4.55889	4.61692	4.60133	7	4	7	50	38	39	0.261421	0.152976	0.275783	1.26385	1.45953	1.3888	0.85003	0.47716	0.924137	4.13525	4.61875	4.5825
556445	NM_001083825,XM_005173960,XR_002456414	gls2b	glutaminase 2b (liver, mitochondrial)	protein_coding	NP_001077294.1;XP_005174017.1	ZDB-GENE-050208-408	.	-2.47612	186.897	0.395913	-3.30396	0.000953294	0.00543377	6.75089	8.05579	7.38639	8.23471	7.32193	6.82431	7.19967	7.08716	157	400	137	112	132	119	2.61141	7.87765	2.60813	1.12481	2.29373	1.69979	8.4912	24.5719	8.73975	3.68029	7.25859	5.60866
556489	NM_001044349,XM_009303217,XM_009303219,XM_009303221,XM_021477538,XM_021477539,XM_021477540,XM_021477541,XM_021477544,XR_002459139	mybpc3	myosin binding protein C, cardiac	protein_coding	NP_001037814.2;XP_009301492.1;XP_009301494.1;XP_009301496.1;XP_021333213.1;XP_021333214.1;XP_021333215.1;XP_021333216.1;XP_021333219.1	ZDB-GENE-070112-2362	.	-2.10715	831.432	0.264603	-4.06381	4.8279e-05	0.000430853	9.06361	10.1393	9.79763	10.2417	9.60183	9.30574	9.15923	9.40395	900	1378	680	801	442	644	9.31109	13.87	7.6369	5.20154	4.17793	5.7851	30.2757	43.263	25.5909	17.0191	13.2212	19.0886
556497	XM_009305325,XM_679321	si:dkey-5g14.1	si:dkey-5g14.1, transcript variant X1	protein_coding	XP_009303600.1;XP_684413.5	ZDB-GENE-091204-361	.	-3.54698	96.0377	0.318005	-5.7439	9.25201e-09	2.0877e-07	5.39195	7.22965	6.84867	6.68049	6.89963	6.06521	5.7236	6.09753	143	108	145	74	23	55	3.46578	2.55489	3.70377	1.08993	0.491833	1.15047	11.2692	7.96918	12.4112	3.56617	1.55642	3.79612
556502	NM_001326709	adma	adrenomedullin a	protein_coding	NP_001313638.1	ZDB-GENE-120221-5	.	7.31402	546.283	0.220922	12.994	1.32292e-38	4.94853e-36	9.9085	7.03887	7.75258	8.01488	7.73167	9.37942	9.52613	9.31152	103	148	94	1371	1075	907	2.83447	3.97397	2.70912	22.8408	27.2091	21.4839	9.21647	12.3955	9.07816	74.7337	86.1041	70.8887
556528	NM_001030101,XM_005173961,XM_009296105	rdh5	retinol dehydrogenase 5 (11-cis/9-cis)	protein_coding	NP_001025272.1;XP_005174018.1;XP_009294380.1	ZDB-GENE-050208-411	.	-5.10886	144.908	0.338315	-6.95507	3.5239e-12	1.45589e-10	5.56691	7.92133	7.18478	7.82486	7.13183	6.29458	6.34047	6.1996	165	322	147	73	52	42	4.3489	8.34498	4.06743	1.16701	1.24564	0.942848	14.1408	26.0296	13.6298	3.81837	3.94186	3.11104
556532	XM_021470009,XM_679356	LOC556532	delta-type opioid receptor-like, transcript variant X1	protein_coding	XP_021325684.1;XP_684448.3	.	.	-2.21655	45.3337	0.381124	-3.01297	0.00258705	0.0124744	4.82672	5.96091	5.58066	5.5196	5.78645	5.08908	5.39851	5.10487	52	44	68	32	41	23	1.44018	1.15062	1.9423	0.529933	1.00165	0.528869	4.68284	3.589	6.50858	1.73391	3.16976	1.74507
556551	XM_005172940,XM_017358378,XM_021479922,XM_679378	shroom2b	shroom family member 2b, transcript variant X1	protein_coding	XP_005172997.2;XP_017213867.2;XP_021335597.1;XP_684470.7	ZDB-GENE-130819-2	.	2.26105	974.488	0.175427	6.7093	1.95557e-11	7.0966e-10	10.4004	9.22264	9.56485	9.34181	9.55464	10.0977	10.2386	10.1738	599	417	562	1833	1440	1419	5.69535	3.86654	5.63653	10.6219	12.5657	11.7013	18.5188	12.0605	18.8878	34.7543	39.7646	38.61
556563	NM_001326500,NM_001326501,XM_002664987,XM_021466693	si:dkey-7j14.5	si:dkey-7j14.5	protein_coding	NP_001313429.1;NP_001313430.1;XP_002665033.1;XP_021322368.1	ZDB-GENE-030131-8110	.	-2.04813	1210.41	0.163601	-6.32214	2.57969e-10	7.74615e-09	9.63432	10.6672	10.5088	10.4382	10.4475	9.73541	9.88473	9.96281	1558	1347	1383	990	805	941	35.4485	30.7378	33.8051	15.906	17.6701	18.8699	115.263	95.8768	113.28	52.0434	55.9178	62.2634
556575	NM_001135971	lratb.2	lecithin retinol acyltransferase b, tandem duplicate 2	protein_coding	NP_001129443.1	ZDB-GENE-081022-106	.	-5.57924	50.9005	0.381955	-6.49309	8.40936e-11	2.74781e-09	3.96882	6.42866	5.73524	6.03283	5.77944	4.83193	4.93492	5.08479	66	93	67	16	14	23	3.53073	4.84997	3.74931	0.486527	0.638969	1.0554	11.4804	15.128	12.5638	1.59189	2.02204	3.48241
556601	NM_001077372,XM_017353833	slc22a13b	solute carrier family 22 member 13b	protein_coding	NP_001070840.2;XP_017209322.1	ZDB-GENE-061013-532	.	-2.6362	22.5381	0.59167	-2.36358	0.0180992	0.0590479	3.60623	5.03993	4.42637	4.83644	4.38597	4.38379	4.11137	4.02032	22	45	19	32	9	6	0.378525	0.7818	0.354924	0.341298	0.137361	0.078834	1.2308	2.43858	1.18934	1.11671	0.434684	0.260122
556612	NM_001123237	serpine3	serpin peptidase inhibitor, clade E (nexin, plasminogen activator inhibitor type 1), member 3	protein_coding	NP_001116709.1	ZDB-GENE-050309-223	.	-2.14303	40.0077	0.516186	-2.13035	0.033143	0.0941072	4.66912	5.77013	5.08499	5.85397	5.03806	4.97388	4.96145	5.05136	28	90	24	36	23	30	0.639373	2.06378	0.578247	0.505931	0.494984	0.598916	2.07897	6.43733	1.93768	1.65538	1.56639	1.97619
556628	XM_005156418	zgc:111868	zgc:111868	protein_coding	XP_005156475.1	ZDB-GENE-050809-138	.	-2.27526	50.2446	0.328279	-3.61287	0.000302821	0.00207274	4.9491	6.12098	5.72201	5.78545	5.89066	5.22434	5.44264	5.35808	56	58	69	35	37	33	0.572213	0.576304	0.74988	0.216886	0.344809	0.283555	1.86059	1.7976	2.51282	0.709636	1.09116	0.935625
556634	XM_021476316	adamtsl7	ADAMTS-like 7	protein_coding	XP_021331991.1	ZDB-GENE-070816-2	.	3.50772	158.957	0.304921	5.9377	2.89044e-09	7.22485e-08	7.95018	6.14168	6.50125	6.77005	6.698	7.64453	7.76795	7.21263	48	72	65	398	309	167	0.939488	1.38269	1.35103	4.75328	5.60885	2.82753	3.05481	4.31286	4.52724	15.5524	17.7494	9.32978
556635	NM_001082806,XR_002459798	zgc:161973	zgc:161973	protein_coding	NP_001076275.1	ZDB-GENE-070410-13	.	-2.15791	134.765	0.210881	-5.26188	1.42587e-07	2.4851e-06	6.41605	7.52464	7.25383	7.23536	7.32653	6.71088	6.75185	6.70743	164	150	171	124	88	87	4.02964	3.75093	4.56828	1.93896	2.23381	1.9982	13.1027	11.6999	15.3081	6.34415	7.06899	6.59331
556650	NM_001044810	irgq2	immunity-related GTPase family, q2	protein_coding	NP_001038275.1	ZDB-GENE-051212-7	.	-5.32195	66.3378	0.382584	-6.30439	2.89337e-10	8.60927e-09	4.41046	6.79973	6.0958	6.49102	6.13149	5.13501	5.47816	5.21905	82	128	82	21	32	18	2.92024	4.43898	3.08216	0.442938	1.03843	0.525895	9.49536	13.846	10.3282	1.44927	3.28615	1.73525
556653	XM_009292031,XM_021466809	LOC556653	uncharacterized LOC556653, transcript variant X1	protein_coding	XP_009290306.1;XP_021322484.1	.	.	-2.49325	223.341	0.283434	-4.65021	3.31605e-06	4.16018e-05	7.00188	8.31522	8.2572	7.66624	8.07359	7.18294	7.43386	7.35444	379	174	292	152	147	139	7.20213	3.16019	5.84792	1.73085	2.55075	2.24023	23.4182	9.85721	19.5961	5.66323	8.07193	7.3919
556677	NM_001039357	mfap2	microfibrillar-associated protein 2	protein_coding	NP_001034446.1	ZDB-GENE-030131-6710	.	-2.0204	192.051	0.352751	-2.87637	0.00402272	0.0179638	6.992	8.00456	7.39009	8.17929	7.51028	7.04074	7.23901	7.35554	147	359	164	144	129	161	12.9454	31.0754	15.2931	7.70272	10.4454	12.2403	42.093	96.9301	51.2467	25.2028	33.0549	40.3884
556696	XM_679547	slc7a14b	solute carrier family 7, member 14b	protein_coding	XP_684639.2	ZDB-GENE-091113-47	.	-2.37303	27.6756	0.4812	-2.59088	0.00957296	0.0359363	4.03253	5.28489	4.76243	5.17306	4.63534	4.52455	4.50255	4.48208	28	54	20	26	16	16	0.36897	0.696883	0.274156	0.204748	0.192885	0.179214	1.19973	2.17371	0.918684	0.669924	0.610393	0.591337
556760	NM_001044352,XM_005159260	daw1	dynein assembly factor with WDR repeat domains 1	protein_coding	NP_001037817.1;XP_005159317.1	ZDB-GENE-050419-255	.	2.88734	79.7983	0.299659	5.10493	3.30909e-07	5.36059e-06	6.88955	5.35863	5.81553	5.7909	5.97463	6.50974	6.68302	6.38017	34	30	44	169	143	101	0.849245	0.73837	1.19418	2.63941	3.38738	2.23916	2.76138	2.30311	4.00164	8.63599	10.7195	7.38839
556781	NM_001099417	tdh2	L-threonine dehydrogenase 2	protein_coding	NP_001092887.1	ZDB-GENE-070620-14	.	-2.27753	2449.04	0.142084	-8.35753	6.40458e-17	4.65568e-15	10.545	11.733	11.4387	11.5848	11.4933	10.8597	10.7625	10.8089	2878	3166	2908	2344	1387	1560	51.7276	55.6164	55.1371	25.4485	22.8545	24.0836	168.196	173.478	184.762	83.2658	72.3238	79.4668
556794	NM_001256764,XM_017353579,XR_659675	ttll9	tubulin tyrosine ligase-like family, member 9	protein_coding	NP_001243693.1;XP_017209068.1	ZDB-GENE-030131-1582	.	2.09588	73.5194	0.283826	3.7613	0.000169034	0.00125782	6.6357	5.57296	5.84097	6.01501	5.86785	6.45673	6.38295	6.26969	38	49	38	164	100	90	0.949126	1.5677	0.817039	2.01862	2.21391	1.99139	3.08615	4.88996	2.73786	6.60479	7.006	6.57084
556849	XM_679770	entpd5a	ectonucleoside triphosphate diphosphohydrolase 5a	protein_coding	XP_684862.2	ZDB-GENE-100419-1	.	-2.16851	67.0472	0.307403	-3.63269	0.000280479	0.00194004	5.40828	6.5177	6.21418	6.38161	6.06054	5.65487	5.75775	5.84118	82	97	62	52	42	52	0.860984	1.00369	0.682707	0.329419	0.403471	0.464245	2.79955	3.1307	2.28772	1.07784	1.2768	1.53183
556876	XM_009291433	si:dkey-83h2.5	si:dkey-83h2.5	protein_coding	XP_009289708.1	ZDB-GENE-131125-81	.	-2.10682	194.436	0.254764	-4.21986	2.4445e-05	0.000240585	6.96659	8.04332	7.5992	8.06331	7.67971	7.2561	7.20743	7.24879	187	307	197	190	118	133	2.55937	4.12044	2.85419	1.57755	1.48073	1.5599	8.32198	12.8524	9.56429	5.16166	4.68581	5.14708
556898	XM_017351207	meox2a	mesenchyme homeobox 2a	protein_coding	XP_017206696.1	ZDB-GENE-080613-1	.	-2.85993	112.787	0.384292	-3.94486	7.98454e-05	0.000669146	5.86195	7.38728	7.10465	7.28689	6.51564	6.4961	6.17738	6.14559	170	198	73	121	47	47	1.38939	1.57575	0.627825	0.595589	0.348697	0.325098	4.51771	4.91506	2.10382	1.94873	1.10346	1.0727
556921	NM_001099983	arl14	ADP-ribosylation factor-like 14	protein_coding	NP_001093453.1	ZDB-GENE-070705-288	.	2.94583	426.715	0.189049	8.24481	1.65422e-16	1.14111e-14	9.31548	7.75677	8.12838	8.26012	8.04365	8.96011	8.95971	9.10926	192	216	161	885	594	744	8.18313	9.00462	7.2435	22.862	23.2906	27.3423	26.608	28.0871	24.2727	74.8031	73.704	90.2193
556978	XM_005170278	tusc5b	tumor suppressor candidate 5b	protein_coding	XP_005170335.1	ZDB-GENE-091204-45	.	-2.28411	50.8265	0.426424	-2.79448	0.00519839	0.0221093	4.96101	6.13968	5.73895	6.07798	5.47856	5.14092	5.50336	5.30925	59	90	36	30	43	31	1.14898	1.70693	0.732257	0.344635	0.758508	0.517457	3.73599	5.32422	2.45376	1.12762	2.40033	1.70741
556980	NM_001346162,XM_021480592	sdccag8	serologically defined colon cancer antigen 8	protein_coding	NP_001333091.1;XP_021336267.1	ZDB-GENE-090313-318	.	2.17408	1066.75	0.18257	6.13684	8.41781e-10	2.3269e-08	10.5128	9.39329	9.55058	9.63801	9.74156	10.4389	10.2564	10.1682	541	568	659	2529	1385	1327	9.46535	9.70572	12.1563	26.7431	22.2259	19.9563	30.7773	30.274	40.7354	87.5017	70.3348	65.8482
556984	NM_001114413	tnmd	tenomodulin	protein_coding	NP_001107885.1	ZDB-GENE-080220-31	.	-2.64301	217.649	0.294414	-4.76261	1.91104e-06	2.56118e-05	6.90429	8.30156	7.95986	8.26946	7.67172	7.05627	7.34707	7.33676	276	369	184	130	135	141	5.92967	7.7427	4.16796	1.68745	2.6547	2.60393	19.2807	24.1509	13.9667	5.52123	8.4009	8.59199
556987	XM_009291771	LOC556987	gap junction delta-2 protein-like	protein_coding	XP_009290046.1	.	.	-4.74712	86.3814	0.420702	-5.3412	9.23343e-08	1.67404e-06	4.90199	7.1585	6.44856	6.96597	6.43172	5.71355	5.35475	5.83556	101	179	94	51	12	45	2.70391	4.67608	2.65092	0.816206	0.286247	1.02406	8.79197	14.5856	8.88312	2.67058	0.905838	3.37902
557046	XM_005173160,XM_680022	slc26a2	solute carrier family 26 (anion exchanger), member 2, transcript variant X2	protein_coding	XP_005173217.1;XP_685114.1	ZDB-GENE-030717-3	.	-2.18169	143.469	0.293051	-3.84044	0.000122815	0.000957633	6.49808	7.61875	7.28317	7.62131	7.0847	6.6493	6.8724	6.83366	164	232	120	107	101	101	3.12346	4.31145	2.31633	1.17447	1.76789	1.58865	10.1562	13.4482	7.76191	3.8428	5.59455	5.24194
557064	XM_001920876	aifm5	apoptosis-inducing factor, mitochondrion-associated, 5	protein_coding	XP_001920911.2	ZDB-GENE-091118-96	.	-3.40213	568.476	0.222688	-7.93235	2.15033e-15	1.36451e-13	8.01276	9.77919	9.32062	9.6349	9.3331	8.40753	8.30661	8.59878	702	928	677	362	208	334	5.6609	7.31153	5.75448	1.75969	1.53315	2.31143	18.4068	22.806	19.283	5.7576	4.85172	7.62685
557176	NM_001281844,XM_005165662,XM_005165663,XM_005165664	pik3r1	phosphoinositide-3-kinase, regulatory subunit 1 (alpha)	protein_coding	NP_001268773.1;XP_005165719.1;XP_005165720.1;XP_005165721.1	ZDB-GENE-030131-1280	.	-2.24267	6695.38	0.130498	-8.92902	4.29793e-19	3.87167e-17	12.0119	13.1769	12.9823	12.9702	12.9188	12.2084	12.2854	12.3133	8686	8021	7699	5630	4163	4567	80.4231	71.3252	74.6654	30.7557	34.6645	36.0804	261.502	222.477	250.201	100.631	109.697	119.052
557196	XM_680210	slc24a3	solute carrier family 24 (sodium/potassium/calcium exchanger), member 3	protein_coding	XP_685302.4	ZDB-GENE-090312-67	.	-2.33665	1449.63	0.194231	-6.30405	2.89961e-10	8.61668e-09	9.76377	10.9872	10.8566	10.5326	10.8302	9.9243	10.1177	10.0609	2084	1356	1925	1105	952	938	19.7757	12.5776	19.2713	6.33301	8.28067	7.64269	64.3022	39.2318	64.5773	20.7212	26.2045	25.218
557223	XM_680236	si:ch211-1a19.3	si:ch211-1a19.3	protein_coding	XP_685328.3	ZDB-GENE-141216-322	.	-2.77751	89.3849	0.421465	-3.49683	0.000470817	0.00301961	5.55854	7.04046	6.26056	7.09504	6.41133	6.1357	5.97061	5.79051	69	192	82	92	46	34	2.11351	5.74305	2.65347	1.70352	1.29009	0.883408	6.87222	17.9137	8.89165	5.57383	4.08256	2.91491
557237	NM_001319136,XM_021478686	tmem237a	transmembrane protein 237a	protein_coding	NP_001306065.1;XP_021334361.1	ZDB-GENE-070402-3	.	-2.17408	480.41	0.273657	-4.09419	4.23642e-05	0.000387245	8.2419	9.36214	9.32548	8.65838	9.26681	8.50327	8.48902	8.4824	753	321	671	454	298	313	23.9204	9.89636	22.503	8.73683	8.66243	8.5556	77.779	30.8686	75.4065	28.5863	27.4126	28.2302
557279	NM_001025488	slc22a16	solute carrier family 22 (organic cation/carnitine transporter), member 16	protein_coding	NP_001020659.1	ZDB-GENE-041001-166	.	-2.00499	97.214	0.280433	-3.57874	0.000345249	0.00232641	6.01626	7.01906	6.73577	6.93235	6.61598	6.25564	6.19516	6.43524	113	137	91	89	53	84	2.91561	3.44867	2.47032	1.39084	1.2373	1.85425	9.48033	10.7571	8.27796	4.55073	3.91547	6.11833
557301	NM_001327818	LOC557301	cocaine- and amphetamine-regulated transcript protein-like	protein_coding	NP_001314747.1	.	.	6.16298	54.5007	0.350764	7.47974	7.4468e-14	3.80981e-12	6.55153	3.92603	5.02093	5.04558	5.0622	5.91946	6.0091	6.04979	13	13	14	124	95	106	0.771632	0.771273	0.876691	4.70357	5.46132	5.75064	2.50902	2.40575	2.93775	15.3898	17.2825	18.9749
557306	XM_002663453	LOC557306	hippocampus abundant transcript 1 protein-like	protein_coding	XP_002663499.2	.	.	-2.41257	2483.4	0.231473	-5.48905	4.04093e-08	7.94728e-07	10.5076	11.7777	11.7164	11.2147	11.5956	10.6501	10.9239	10.7598	3925	2100	3274	1801	1716	1477	27.6121	14.4371	24.2984	7.65344	11.0699	8.92223	89.7828	45.032	81.4229	25.0416	35.0311	29.44
557394	XM_680463	gpr78a	G protein-coupled receptor 78a	protein_coding	XP_685555.2	ZDB-GENE-110411-251	.	-2.30302	37.6962	0.407656	-2.95231	0.00315411	0.0146815	4.52641	5.71003	5.33769	5.18904	5.52386	4.77965	5.06923	4.96268	46	33	59	22	30	25	1.04955	0.739564	1.42632	0.300577	0.622208	0.49371	3.41269	2.30684	4.77955	0.983469	1.969	1.62905
557454	XM_021474294	unc119.2	unc-119 lipid binding chaperone B homolog 2	protein_coding	XP_021329969.1	ZDB-GENE-030131-7635	.	-4.77642	20.4381	0.605539	-3.72549	0.000194936	0.00142065	2.84398	5.07451	4.43925	4.14502	4.6544	3.78471	3.83901	4.02892	31	15	43	6	5	13	1.15138	0.547097	1.72119	0.124086	0.162669	0.427493	3.74378	1.7065	5.76764	0.406001	0.514772	1.41057
557494	XM_009302600,XM_680574	slc4a8	solute carrier family 4, sodium bicarbonate cotransporter, member 8, transcript variant X2	protein_coding	XP_009300875.1;XP_685666.5	ZDB-GENE-131119-88	.	-2.16396	1112.51	0.152942	-7.28171	3.29621e-13	1.56441e-11	9.4575	10.5717	10.3902	10.272	10.3992	9.73727	9.62952	9.75932	1444	1183	1387	1074	625	784	12.9043	10.2793	13.0353	5.78395	5.13088	5.98045	41.9594	32.063	43.6806	18.9247	16.2369	19.7332
557500	NM_001123241,XM_005166733	nr1h5	nuclear receptor subfamily 1, group H, member 5	protein_coding	NP_001116713.1;XP_005166790.1	ZDB-GENE-080403-3	.	2.05777	102.599	0.320722	3.24605	0.00117018	0.00644147	7.11011	6.0671	6.25405	6.43678	6.37787	6.75244	7.1377	6.58421	51	65	60	178	196	100	0.906196	1.33331	1.44453	2.0193	3.49467	1.58426	2.94656	4.15885	4.84055	6.60703	11.059	5.22745
557552	NM_001044830,XM_021467659	zgc:153031	zgc:153031	protein_coding	NP_001038295.1;XP_021323334.1	ZDB-GENE-060929-1190	.	-2.19054	85.9392	0.256164	-4.41627	1.00417e-05	0.000110632	5.75375	6.88168	6.62872	6.51574	6.66576	6.04935	6.06118	6.16782	111	89	111	74	50	64	2.72	2.14459	2.90042	1.10102	1.15155	1.38969	8.84428	6.68936	9.71918	3.60248	3.64414	4.58543
557557	XM_017354460	cfi	complement factor I	protein_coding	XP_017209949.1	ZDB-GENE-110922-7	.	2.42862	270.483	0.272773	4.69304	2.69172e-06	3.46007e-05	8.58276	7.29967	7.73637	7.37923	7.70194	8.07266	8.52528	8.28288	170	93	154	425	485	389	3.34138	1.79414	3.19414	5.06452	8.78488	6.59643	10.8647	5.59625	10.7034	16.5708	27.8001	21.7657
557568	XM_680654	ankrd33aa	ankyrin repeat domain 33Aa	protein_coding	XP_685746.3	ZDB-GENE-080520-2	.	-2.93649	296.399	0.253665	-6.12655	8.98025e-10	2.47939e-08	7.23496	8.78842	8.55806	8.11869	8.65296	7.62354	7.68579	7.56679	447	249	473	222	162	144	10.7022	5.81846	11.9521	3.21127	3.54918	2.95278	34.7989	18.1489	40.0511	10.5071	11.2315	9.74306
557602	NM_001044833,XM_005164640,XM_005164641	dyrk2	dual-specificity tyrosine-(Y)-phosphorylation regulated kinase 2	protein_coding	NP_001038298.1;XP_005164697.1;XP_005164698.1	ZDB-GENE-030131-2804	.	-2.31951	1903.63	0.212972	-5.69942	1.20214e-08	2.62993e-07	10.1638	11.3773	11.126	11.36	10.8805	10.3388	10.4429	10.5028	2389	2887	1720	1502	1152	1317	24.8124	31.9859	19.9573	10.3572	12.0243	12.5784	80.6793	99.7701	66.876	33.888	38.0514	41.504
557628	NM_001044834,XM_005160421	si:dkey-239i20.4	si:dkey-239i20.4	protein_coding	NP_001038299.2;XP_005160478.1	ZDB-GENE-030131-2644	.	3.74082	179.213	0.241247	7.88966	3.03016e-15	1.85615e-13	8.14394	6.23969	6.78647	6.80971	6.79111	7.73149	7.94051	7.57107	68	66	65	403	345	237	0.944196	0.898848	0.957631	3.69378	4.74477	3.08981	3.07012	2.80368	3.20898	12.0858	15.015	10.1952
557632	NM_001329437	si:ch211-197l9.4	si:ch211-197l9.4	protein_coding	NP_001316366.1	ZDB-GENE-091204-137	.	-2.21721	652.677	0.171237	-6.70851	1.96619e-11	7.12386e-10	8.66603	9.81243	9.62914	9.6381	9.48184	8.82582	8.99539	8.9667	862	815	693	520	436	445	9.2031	8.4995	7.80094	3.35341	4.26321	4.07822	29.9245	26.5115	26.1406	10.9722	13.4911	13.4566
[truncated: 1,808 more rows]
